# Supplementary material for: Does the Act of Copulation per se, without Considering Seminal Deposition, Change the Expression of Genes in the Porcine Female Genital Tract?
Source: PubMed Central journal article supplement (PMC7432858; doi:10.3390/ijms21155477), 2020-07-31
Supplement: ijms-21-05477-s001.pdf [file ijms-21-05477-s001.pdf]

**Supplementary Table 1.** List (akronym and description) of differentially expressed genes ( $P < 0.05$ ) solely related to copulation, in in pig endocervix (Cvx) up- or down-regulated.

| UP                  | Description                                                                                                                                  | DOWN                |                                                                                                                                                        |
|---------------------|----------------------------------------------------------------------------------------------------------------------------------------------|---------------------|--------------------------------------------------------------------------------------------------------------------------------------------------------|
| <i>AGT</i>          | angiotensinogen (serpin peptidase inhibitor, clade A, member 8)                                                                              | <i>ABHD2</i>        | abhydrolase domain containing 2(ABHD2)                                                                                                                 |
| <i>AKAP13</i>       | A kinase (PRKA) anchor protein 13; A-kinase anchor protein 13-like                                                                           | <i>AGPAT2</i>       | 1-acylglycerol-3-phosphate O-acyltransferase 2(AGPAT2)                                                                                                 |
| <i>AKAP9</i>        | A kinase (PRKA) anchor protein 9; A-kinase anchor protein 9-like                                                                             | <i>ANXA5</i>        | annexin A5(ANXA5)                                                                                                                                      |
| <i>ANKRD33B</i>     | ankyrin repeat domain 33B; ankyrin repeat domain-containing protein 33B-like                                                                 | <i>ATP6V0C</i>      | ATPase H+ transporting V0 subunit c(ATP6V0C)                                                                                                           |
| <i>C2H5orf45</i>    | chromosome 2 open reading frame, human C5orf45                                                                                               | <i>B3GALT2</i>      | beta-1,3-galactosyltransferase 2(B3GALT2)                                                                                                              |
| <i>C4H1orf110</i>   | chromosome 4 open reading frame, human C1orf110                                                                                              | <i>B4GALT1</i>      | beta-1,4-galactosyltransferase 1(B4GALT1)                                                                                                              |
| <i>CCDC130</i>      | coiled-coil domain containing 130(CCDC130)                                                                                                   | <i>BRINP2</i>       | BMP/retinoic acid inducible neural specific 2(BRINP2)                                                                                                  |
| <i>CCDC92</i>       | coiled-coil domain containing 92(CCDC92)                                                                                                     | <i>C7H14orf119</i>  | chromosome 7 open reading frame, human C14orf119(C7H14orf119)                                                                                          |
| <i>CDKAL1</i>       | CDK5 regulatory subunit associated protein 1 like 1(CDKAL1)                                                                                  | <i>C8H4orf32</i>    | chromosome 8 open reading frame, human C4orf32                                                                                                         |
| <i>COLCA2</i>       | colorectal cancer associated 2(COLCA2)                                                                                                       | <i>CD47</i>         | CD47 molecule                                                                                                                                          |
| <i>CPD</i>          | carboxypeptidase D(CPD)                                                                                                                      | <i>CDH7</i>         | cadherin 7(CDH7)                                                                                                                                       |
| <i>CRTC1</i>        | CREB regulated transcription coactivator 1(CRTC1)                                                                                            | <i>CMPK2</i>        | cytidine/uridine monophosphate kinase 2(CMPK2)                                                                                                         |
| <i>DACH1</i>        | dachshund family transcription factor 1                                                                                                      | <i>CMTR1</i>        | cap methyltransferase 1; cap-specific mRNA (nucleoside-2-O)-methyltransferase 1-like; uncharacterized LOC102158493 (CMTR1; LOC106507681; LOC102158493) |
| <i>DAZAP2</i>       | DAZ associated protein 2(DAZAP2)                                                                                                             | <i>CPXM1</i>        | carboxypeptidase X, M14 family member 1(CPXM1)                                                                                                         |
| <i>DDX17</i>        | DEAD-box helicase 17(DDX17)                                                                                                                  | <i>CXCL10</i>       | C-X-C motif chemokine ligand 10(CXCL10)                                                                                                                |
| <i>DECR2</i>        | 2,4-dienoyl-CoA reductase 2, peroxisomal(DECR2)                                                                                              | <i>CYP51</i>        | cytochrome P450, family 51, subfamily A, polypeptide 1(CYP51)                                                                                          |
| <i>ENPP5</i>        | ectonucleotide pyrophosphatase/phosphodiesterase 5 (putative)(ENPP5)                                                                         | <i>DCBLD1</i>       | discoidin, CUB and LCCL domain containing 1(DCBLD1)                                                                                                    |
| <i>FAM107A</i>      | family with sequence similarity 107 member A(FAM107A)                                                                                        | <i>DLGAP2</i>       | DLG associated protein 2(DLGAP2)                                                                                                                       |
| <i>FMO1</i>         | flavin containing monooxygenase 1(FMO1)                                                                                                      | <i>DPT</i>          | dermatopontin(DPT)                                                                                                                                     |
| <i>FUNDC2</i>       | FUN14 domain containing 2(FUNDC2)                                                                                                            | <i>DRAM1</i>        | DNA damage regulated autophagy modulator 1(DRAM1)                                                                                                      |
| <i>GGA2</i>         | golgi associated, gamma adaptin ear containing, ARF binding protein 2(GGA2)                                                                  | <i>ENPEP</i>        | glutamyl aminopeptidase(ENPEP)                                                                                                                         |
| <i>HDAC9</i>        | histone deacetylase 9(HDAC9)                                                                                                                 | <i>FAM111A</i>      | family with sequence similarity 111 member A(FAM111A)                                                                                                  |
| <i>IGF1R</i>        | insulin like growth factor 1 receptor(IGF1R)                                                                                                 | <i>FDP5</i>         | farnesyl diphosphate synthase(FDP5)                                                                                                                    |
| <i>ING1</i>         | inhibitor of growth family, member 1                                                                                                         | <i>FGFBP1</i>       | fibroblast growth factor binding protein 1(FGFBP1)                                                                                                     |
| <i>KCNQ4</i>        | potassium voltage-gated channel subfamily Q member 4(KCNQ4)                                                                                  | <i>GARS</i>         | glycyl-tRNA synthetase(GARS)                                                                                                                           |
| <i>LOC100153094</i> | glutathione S-transferase theta-1(LOC100153094)                                                                                              | <i>GCNT3</i>        | glucosaminyl (N-acetyl) transferase 3, mucin type(GCNT3)                                                                                               |
| <i>LOC100153559</i> | leucine rich adaptor protein 1-like                                                                                                          | <i>GJA1</i>         | gap junction protein alpha 1(GJA1)                                                                                                                     |
| <i>LOC100520903</i> | zinc finger protein 300-like(LOC100520903)                                                                                                   | <i>HMGR</i>         | 3-hydroxy-3-methylglutaryl-CoA reductase(HMGR)                                                                                                         |
| <i>LOC100521052</i> | mitochondrial inner membrane protease subunit 2(LOC100521052)                                                                                | <i>HMGC1</i>        | 3-hydroxy-3-methylglutaryl-CoA synthase 1(HMGC1)                                                                                                       |
| <i>LOC100523068</i> | CUB and sushi domain-containing protein 2-like; uncharacterized LOC102159420                                                                 | <i>HTRA4</i>        | HtrA serine peptidase 4(HTRA4)                                                                                                                         |
| <i>LOC100627616</i> | calcium-activated potassium channel subunit alpha-1-like; potassium channel, calcium activated large conductance subfamily M alpha, member 1 | <i>IER3</i>         | immediate early response 3(IE3)                                                                                                                        |
| <i>LOC100738970</i> | CXXC-type zinc finger protein 4(LOC100738970)                                                                                                | <i>IFI44</i>        | interferon induced protein 44(IFI44)                                                                                                                   |
| <i>LOC102159576</i> | trinucleotide repeat-containing gene 6B protein-like; uncharacterized LOC106510264; uncharacterized LOC100516974                             | <i>IFRD1</i>        | interferon related developmental regulator 1(IFRD1)                                                                                                    |
| <i>LOC102166095</i> | nuclear receptor coactivator 2-like(LOC102166095)                                                                                            | <i>IL6ST</i>        | interleukin 6 signal transducer(IL6ST)                                                                                                                 |
| <i>LOC102166102</i> | methylcytosine dioxygenase TET2-like; methylcytosine dioxygenase TET2                                                                        | <i>INSIG1</i>       | insulin induced gene 1(INSIG1)                                                                                                                         |
| <i>MIR181B-1</i>    | microRNA 181b-(MIR181B-1)                                                                                                                    | <i>ISG12(A)</i>     | putative ISG12(a) protein(ISG12(A))                                                                                                                    |
| <i>MTURN</i>        | myosin regulatory light chain interacting protein(MYLIP)                                                                                     | <i>KSR1</i>         | kinase suppressor of ras 1(KSR1)                                                                                                                       |
| <i>MYLIP</i>        | myosin regulatory light chain interacting protein                                                                                            | <i>LOC100152428</i> | multidrug resistance-associated protein 1-like(LOC100152428)                                                                                           |
| <i>NCOR2</i>        | nuclear receptor corepressor 2(NCOR2)                                                                                                        | <i>LOC100153163</i> | MHC class I polypeptide-related sequence B-like                                                                                                        |
| <i>NDRG4</i>        | NDRG family member 4(NDRG4)                                                                                                                  | <i>LOC100154959</i> | olfactory receptor 4K3(LOC100154959)                                                                                                                   |
| <i>NTN4</i>         | netrin 4(NTN4)                                                                                                                               | <i>LOC100157647</i> | pleckstrin homology domain-containing family A member 1; pleckstrin homology domain-containing family A member 1-like                                  |

|                 |                                                         |                     |                                                                                                |
|-----------------|---------------------------------------------------------|---------------------|------------------------------------------------------------------------------------------------|
| <i>PCBD1</i>    | pterin-4 alpha-carbinolamine dehydratase 1(PCBD1)       | <i>LOC100158037</i> | probable ATP-dependent RNA helicase DDX60(LOC100158037)                                        |
| <i>PDZRN4</i>   | PDZ domain containing ring finger 4(PDZRN4)             | <i>LOC100511841</i> | UDP-glucuronosyltransferase 1-10(LOC100511841)                                                 |
| <i>PNISR</i>    | PNN interacting serine and arginine rich protein(PNISR) | <i>LOC100517053</i> | integrin alpha-3(LOC100517053)                                                                 |
| <i>PRKCC</i>    | protein kinase C theta(PRKCC)                           | <i>LOC100517940</i> | apolipoprotein L3-like                                                                         |
| <i>PYGO1</i>    | pygopus family PHD finger 1(PYGO1)                      | <i>LOC100518083</i> | E3 ISG15-protein ligase HERC5(LOC100518083)                                                    |
| <i>RETSAT</i>   | retinol saturase(RETSAT)                                | <i>LOC100523138</i> | transmembrane protein 88-like(LOC100523138)                                                    |
| <i>RFXAP</i>    | regulatory factor X associated protein(RFXAP)           | <i>LOC100525346</i> | poliovirus receptor homolog(LOC100525346)                                                      |
| <i>RNF149</i>   | ring finger protein 149(RNF149)                         | <i>LOC100623063</i> | protein FAM69A-like; family with sequence similarity 69, member A (LOC100623063; FAM69A)       |
| <i>SESN3</i>    | sestrin 3(SESN3)                                        | <i>LOC100625846</i> | histone deacetylase 8-like                                                                     |
| <i>SLC9A3R2</i> | SLC9A3 regulator 2(SLC9A3R2)                            | <i>LOC100737852</i> | peptidyl-prolyl cis-trans isomerase C-like                                                     |
| <i>SPHKAP</i>   | SPHK1 interactor, AKAP domain containing                | <i>LOC100739412</i> | histidine decarboxylase-like                                                                   |
| <i>SREK1</i>    | splicing regulatory glutamine/lysine-rich protein 1     | <i>LOC100739844</i> | semaphorin-3A-like(LOC100739844)                                                               |
| <i>THBS3</i>    | thrombospondin 3(THBS3)                                 | <i>LOC102161647</i> | trichohyalin                                                                                   |
| <i>TMEM131</i>  | transmembrane protein 131(TMEM131)                      | <i>LOC102165708</i> | uncharacterized LOC102165708                                                                   |
| <i>TMEM141</i>  | transmembrane protein 141(TMEM141)                      | <i>LOC106504198</i> | protein S100-A5-like; protein S100-A5                                                          |
| <i>TMEM213</i>  | transmembrane protein 213(TMEM213)                      | <i>LRP12</i>        | LDL receptor related protein 12(LRP12)                                                         |
| <i>TSHZ2</i>    | teashirt zinc finger homeobox 2(TSHZ2)                  | <i>LRP8</i>         | LDL receptor related protein 8(LRP8)                                                           |
| <i>VAMP2</i>    | vesicle associated membrane protein 2(VAMP2)            | <i>MAN2A1</i>       | mannosidase alpha class 2A member 1(MAN2A1)                                                    |
| <i>ZBTB44</i>   | zinc finger and BTB domain containing 44(ZBTB44)        | <i>MAPK6</i>        | mitogen-activated protein kinase 6(MAPK6)                                                      |
| <i>ZNF239</i>   | zinc finger protein 239                                 | <i>MFSD2A</i>       | major facilitator superfamily domain containing 2A(MFSD2A)                                     |
| <i>ZNF318</i>   | zinc finger protein 318                                 | <i>MIR671</i>       | microRNA mir-671; chondroitin polymerizing factor 2 (MIR671; CHPF2)                            |
|                 |                                                         | <i>MMP3</i>         | matrix metalloproteinase 3 (stromelysin 1, progelatinase)(MMP3)                                |
|                 |                                                         | <i>MTMR11</i>       | myotubularin related protein 11(MTMR11)                                                        |
|                 |                                                         | <i>MX1</i>          | myxovirus (influenza virus) resistance 1, interferon-inducible protein p78 (mouse)(MX1)        |
|                 |                                                         | <i>NCOA4</i>        | nuclear receptor coactivator 4(NCOA4)                                                          |
|                 |                                                         | <i>NPC1</i>         | NPC intracellular cholesterol transporter 1(NPC1)                                              |
|                 |                                                         | <i>NPR2</i>         | natriuretic peptide receptor B/guanylate cyclase B (atrionatriuretic peptide receptor B)(NPR2) |
|                 |                                                         | <i>NPY2R</i>        | neuropeptide Y receptor Y2(NPY2R)                                                              |
|                 |                                                         | <i>NT5C2</i>        | 5'-nucleotidase, cytosolic II(NT5C2)                                                           |
|                 |                                                         | <i>OLFML3</i>       | olfactomedin like 3(OLFML3)                                                                    |
|                 |                                                         | <i>PALM2</i>        | paralemmin 2(PALM2)                                                                            |
|                 |                                                         | <i>PANK3</i>        | pantothenate kinase 3(PANK3)                                                                   |
|                 |                                                         | <i>PAPSS2</i>       | 3'-phosphoadenosine 5'-phosphosulfate synthase 2(PAPSS2)                                       |
|                 |                                                         | <i>PGD</i>          | phosphogluconate dehydrogenase(PGD)                                                            |
|                 |                                                         | <i>PLAT</i>         | plasminogen activator, tissue type(PLAT)                                                       |
|                 |                                                         | <i>PLAUR</i>        | plasminogen activator, urokinase receptor(PLAUR)                                               |
|                 |                                                         | <i>PLOD2</i>        | procollagen-lysine,2-oxoglutarate 5-dioxygenase 2(PLOD2)                                       |
|                 |                                                         | <i>PRSS23</i>       | protease, serine 23(PRSS23)                                                                    |
|                 |                                                         | <i>RASD1</i>        | ras related dexamethasone induced 1(RASD1)                                                     |
|                 |                                                         | <i>RECS</i>         | RECS meiotic recombination protein(RECS)                                                       |
|                 |                                                         | <i>RIPK3</i>        | receptor interacting serine/threonine kinase 3(RIPK3)                                          |
|                 |                                                         | <i>RNF24</i>        | ring finger protein 24                                                                         |
|                 |                                                         | <i>RSAD2</i>        | radical S-adenosyl methionine domain containing 2(RSAD2)                                       |
|                 |                                                         | <i>S1PR3</i>        | sphingosine-1-phosphate receptor 3(S1PR3)                                                      |
|                 |                                                         | <i>SEPHS2</i>       | selenophosphate synthetase 2(SEPHS2)                                                           |
|                 |                                                         | <i>SGPP2</i>        | sphingosine-1-phosphate phosphatase 2(SGPP2)                                                   |
|                 |                                                         | <i>SLA-7</i>        | MHC class I antigen 7(SLA-7)                                                                   |
|                 |                                                         | <i>SLC25A17</i>     | solute carrier family 25 member 17(SLC25A17)                                                   |
|                 |                                                         | <i>SLC30A7</i>      | solute carrier family 30 member 7(SLC30A7)                                                     |
|                 |                                                         | <i>SNX31</i>        | sorting nexin 31(SNX31)                                                                        |
|                 |                                                         | <i>SOLE</i>         | squalene epoxidase(SOLE)                                                                       |
|                 |                                                         | <i>SRPX2</i>        | sushi repeat containing protein, X-linked 2(SRPX2)                                             |
|                 |                                                         | <i>STARD4</i>       | StAR related lipid transfer domain containing 4(STARD4)                                        |
|                 |                                                         | <i>TAPBP</i>        | TAP binding protein(TAPBP)                                                                     |
|                 |                                                         | <i>TDG</i>          | thymine-DNA glycosylase(TDG)                                                                   |

|  |  |                |                                                           |
|--|--|----------------|-----------------------------------------------------------|
|  |  | <i>THBS1</i>   | thrombospondin 1(THBS1)                                   |
|  |  | <i>TM4SF1</i>  | transmembrane 4 L six family member 1(TM4SF1)             |
|  |  | <i>TRIB2</i>   | tribbles pseudokinase 2                                   |
|  |  | <i>UBA7</i>    | ubiquitin like modifier activating enzyme 7(UBA7)         |
|  |  | <i>UBASH3B</i> | ubiquitin associated and SH3 domain containing B(UBASH3B) |
|  |  | <i>VCAN</i>    | versican(VCAN)                                            |
|  |  | <i>XPNPEP1</i> | X-prolyl aminopeptidase 1(XPNPEP1)                        |
|  |  | <i>ZBP1</i>    | Z-DNA binding protein 1(ZBP1)                             |

**Supplementary Table 2.** List (akronym and description) of differentially expressed genes ( $P < 0.05$ ) solely related to copulation, in pig distal endometrium (DistUt) up- or down-regulated.

| UP         |                                                                                 | DOWN     |                                                                       |
|------------|---------------------------------------------------------------------------------|----------|-----------------------------------------------------------------------|
| AAR2       | AAR2 splicing factor homolog(AAR2)                                              | ABCB1    | ATP-binding cassette, sub-family B (MDR/TAP), member 1(ABCB1)         |
| ABCA9      | ATP binding cassette subfamily A member 9(ABCA9)                                | ABHD2    | abhydrolase domain containing 2(ABHD2)                                |
| ADCK2      | aarF domain containing kinase 2(ADCK2)                                          | ACKR3    | atypical chemokine receptor 3(ACKR3)                                  |
| ADRA2A     | adrenoceptor alpha 2A(ADRA2A)                                                   | ADAM22   | ADAM metallopeptidase domain 22(ADAM22)                               |
| ALDH2      | aldehyde dehydrogenase 2 family (mitochondrial)(ALDH2)                          | ADAMTS3  | ADAM metallopeptidase with thrombospondin type 1 motif, 3             |
| ALDH6A1    | aldehyde dehydrogenase 6 family member A1(ALDH6A1)                              | ADAMTS5  | ADAM metallopeptidase with thrombospondin type 1 motif 5(ADAMTS5)     |
| ANXA9      | annexin A9(ANXA9)                                                               | AFF1     | AF4/FMR2 family member 1(AFF1)                                        |
| AQP9       | aquaporin 9(AQP9)                                                               | AFF2     | AF4/FMR2 family member 2(AFF2)                                        |
| ARRB2      | arrestin beta 2(ARRB2)                                                          | AGR2     | anterior gradient 2, protein disulphide isomerase family member(AGR2) |
| ATP2A3     | ATPase sarcoplasmic/endoplasmic reticulum Ca2+ transporting 3(ATP2A3)           | AGTR1    | angiotensin II receptor type 1(AGTR1)                                 |
| ATP2C2     | ATPase secretory pathway Ca2+ transporting 2(ATP2C2)                            | ALCAM    | activated leukocyte cell adhesion molecule(ALCAM)                     |
| ATP5E      | ATP synthase, H+ transporting, mitochondrial F1 complex, epsilon subunit(ATP5E) | ANXA5    | annexin A5(ANXA5)                                                     |
| BRINP3     | BMP/retinoic acid inducible neural specific 3(BRINP3)                           | ARF4     | ADP ribosylation factor 4(ARF4)                                       |
| C4H1orf110 | chromosome 4 open reading frame, human Clorf110                                 | ARHGAP28 | Rho GTPase activating protein 28(ARHGAP28)                            |
| CACNB2     | calcium voltage-gated channel auxiliary subunit beta 2(CACNB2)                  | ARL6IP5  | ADP ribosylation factor like GTPase 6 interacting protein 5(ARL6IP5)  |
| CAP2       | CAP, adenylate cyclase-associated protein, 2 (yeast)(CAP2)                      | ARMCX3   | armadillo repeat containing, X-linked 3(ARMCX3)                       |
| CAPN15     | calpain 15(CAPN15)                                                              | ATP8B2   | ATPase phospholipid transporting 8B2(ATP8B2)                          |
| CAPN5      | calpain 5(CAPN5)                                                                | B3GALT2  | beta-1,3-galactosyltransferase 2(B3GALT2)                             |
| CASP2      | caspase 2, apoptosis-related cysteine peptidase                                 | B4GALT1  | beta-1,4-galactosyltransferase 1(B4GALT1)                             |
| CBX8       | chromobox 8(CBX8)                                                               | BICC1    | BicC family RNA binding protein 1(BICC1)                              |
| CCDC124    | coiled-coil domain containing 124(CCDC124)                                      | BRINP2   | BMP/retinoic acid inducible neural specific 2(BRINP2)                 |
| CDC25B     | cell division cycle 25B(CDC25B)                                                 | CALU     | calumenin(CALU)                                                       |
| CDC25C     | cell division cycle 25C(CDC25C)                                                 | CC2D2B   | coiled-coil and C2 domain containing 2B(CC2D2B)                       |
| CEP68      | centrosomal protein 68(CEP68)                                                   | CD248    | CD248 molecule(CD248)                                                 |
| CHKA       | choline kinase alpha(CHKA)                                                      | CDH11    | cadherin 11(CDH11)                                                    |
| CNOT1      | CCR4-NOT transcription complex subunit 1(CNOT1)                                 | CFL2     | cofilin 2(CFL2)                                                       |
| CNOT2      | CCR4-NOT transcription complex subunit 2(CNOT2)                                 | CHSY3    | chondroitin sulfate synthase 3(CHSY3)                                 |
| COQ4       | coenzyme Q4(COQ4)                                                               | CLDN11   | claudin 11(CLDN11)                                                    |
| CSF1R      | colony stimulating factor 1 receptor(CSF1R)                                     | CLINT1   | clathrin interactor 1(CLINT1)                                         |
| CUL4A      | cullin 4A(CUL4A)                                                                | COL1A2   | collagen type I alpha 2 chain(COL1A2)                                 |
| CYFIP2     | cytoplasmic FMR1 interacting protein 2(CYFIP2)                                  | COL3A1   | collagen type III alpha 1 chain(COL3A1)                               |
| DGAT1      | diacylglycerol O-acyltransferase 1(DGAT1)                                       | COL4A1   | collagen type IV alpha 1 chain(COL4A1)                                |
| DGUOK      | deoxyguanosine kinase(DGUOK)                                                    | COL5A2   | collagen type V alpha 2 chain(COL5A2)                                 |
| DHRS3      | dehydrogenase/reductase 3(DHRS3)                                                | COL6A3   | collagen type VI alpha 3 chain(COL6A3)                                |
| DHX32      | DEAH-box helicase 32 (putative)(DHX32)                                          | CREB3L2  | cAMP responsive element binding protein 3 like 2(CREB3L2)             |
| DOPEY2     | dopey family member 2(DOPEY2)                                                   | CRISPLD2 | cysteine rich secretory protein LCCL domain containing 2(CRISPLD2)    |
| EHMT2      | euchromatic histone lysine methyltransferase 2(EHMT2)                           | CRYGS    | crystallin gamma S(CRYGS)                                             |
| FAH        | fumarylacetoacetate hydrolase(FAH)                                              | DCLK1    | doublecortin-like kinase 1                                            |
| FAM149A    | family with sequence similarity 149 member A(FAM149A)                           | DCN      | decorin(DCN)                                                          |
| FAM84A     | family with sequence similarity 84 member A(FAM84A)                             | DDX26B   | DEAD/H (Asp-Glu-Ala-Asp/His) box polypeptide 26B                      |
| FCGR1A     | Fc fragment of IgG, high affinity 1a, receptor (CD64)(FCGR1A)                   | DMP1     | dentin matrix acidic phosphoprotein 1(DMP1)                           |

|                     |                                                                                                                        |                 |                                                                                                |
|---------------------|------------------------------------------------------------------------------------------------------------------------|-----------------|------------------------------------------------------------------------------------------------|
| <i>FMO2</i>         | flavin containing monooxygenase 2(FMO2)                                                                                | <i>DNAJB9</i>   | DnaJ heat shock protein family (Hsp40) member B9(DNAJB9)                                       |
| <i>GABRB2</i>       | gamma-aminobutyric acid type A receptor beta2 subunit(GABRB2)                                                          | <i>EDEM3</i>    | ER degradation enhancing alpha-mannosidase like protein 3(EDEM3)                               |
| <i>GARNL3</i>       | GTPase activating Rap/RanGAP domain like 3(GARNL3)                                                                     | <i>EIF2AK3</i>  | eukaryotic translation initiation factor 2 alpha kinase 3(EIF2AK3)                             |
| <i>GMPR</i>         | guanosine monophosphate reductase(GMPR)                                                                                | <i>ELL2</i>     | elongation factor for RNA polymerase II 2(ELL2)                                                |
| <i>GNMT</i>         | glycine N-methyltransferase(GNMT)                                                                                      | <i>ENPEP</i>    | glutamyl aminopeptidase(ENPEP)                                                                 |
| <i>GPA33</i>        | glycoprotein A33(GPA33)                                                                                                | <i>EPHA4</i>    | EPH receptor A4(EPHA4)                                                                         |
| <i>GSTK1</i>        | glutathione S-transferase kappa 1(GSTK1)                                                                               | <i>ERLEC1</i>   | endoplasmic reticulum lectin 1(ERLEC1)                                                         |
| <i>HADH</i>         | hydroxyacyl-CoA dehydrogenase(HADH)                                                                                    | <i>ERO1A</i>    | endoplasmic reticulum oxidoreductase 1 alpha(ERO1A)                                            |
| <i>HSP90AB1</i>     | heat shock protein 90 alpha family class B member 1(HSP90AB1)                                                          | <i>EXOC5</i>    | exocyst complex component 5(EXOC5)                                                             |
| <i>HSP1</i>         | heat shock protein family E (Hsp10) member 1(HSP1)                                                                     | <i>FAM114A1</i> | family with sequence similarity 114 member A1(FAM114A1)                                        |
| <i>IDH3G</i>        | isocitrate dehydrogenase 3 (NAD(+)), gamma(IDH3G)                                                                      | <i>FAM171B</i>  | family with sequence similarity 171 member B(FAM171B)                                          |
| <i>IGSF8</i>        | immunoglobulin superfamily member 8(IGSF8)                                                                             | <i>FAM213A</i>  | family with sequence similarity 213 member A(FAM213A)                                          |
| <i>IL1RAPL2</i>     | interleukin 1 receptor accessory protein like 2(IL1RAPL2)                                                              | <i>FAP</i>      | fibroblast activation protein alpha(FAP)                                                       |
| <i>ING1</i>         | inhibitor of growth family, member 1                                                                                   | <i>FBN1</i>     | fibrillin 1(FBN1)                                                                              |
| <i>IQCE</i>         | IQ motif containing E(IQCE)                                                                                            | <i>FBXL5</i>    | F-box and leucine rich repeat protein 5(FBXL5)                                                 |
| <i>KBTD4</i>        | kelch repeat and BTB domain containing 4(KBTD4)                                                                        | <i>FBXO28</i>   | F-box protein 28(FBXO28)                                                                       |
| <i>KCNMB4</i>       | potassium large conductance calcium-activated channel, subfamily M, beta member 4(KCNMB4)                              | <i>FGF2</i>     | fibroblast growth factor 2(FGF2)                                                               |
| <i>KCTD1</i>        | potassium channel tetramerization domain containing 1(KCTD1)                                                           | <i>FGFR1</i>    | fibroblast growth factor receptor 1(FGFR1)                                                     |
| <i>KCTD12</i>       | potassium channel tetramerization domain containing 12(KCTD12)                                                         | <i>FKBP7</i>    | FK506 binding protein 7(FKBP7)                                                                 |
| <i>KRT19</i>        | keratin 19(KRT19)                                                                                                      | <i>FOXP2</i>    | forkhead box P2(FOXP2)                                                                         |
| <i>LOC100152489</i> | olfactory receptor 13C8(LOC100152489)                                                                                  | <i>FRZB</i>     | frizzled-related protein(FRZB)                                                                 |
| <i>LOC100153966</i> | activator of 90 kDa heat shock protein ATPase homolog 1(LOC100153966)                                                  | <i>GCLM</i>     | glutamate-cysteine ligase modifier subunit(GCLM)                                               |
| <i>LOC100155148</i> | mitochondrial intermediate peptidase                                                                                   | <i>GCNT3</i>    | glucosaminyl (N-acetyl) transferase 3, mucin type(GCNT3)                                       |
| <i>LOC100513474</i> | platelet-activating factor acetylhydrolase 1B subunit gamma(LOC100513474)                                              | <i>GJA1</i>     | gap junction protein alpha 1(GJA1)                                                             |
| <i>LOC100513647</i> | uncharacterized LOC100513647                                                                                           | <i>GNAI1</i>    | G protein subunit alpha ii(GNAI1)                                                              |
| <i>LOC100514456</i> | E3 ubiquitin-protein ligase RNF144A-like                                                                               | <i>GORAB</i>    | golgin, RAB6-interacting                                                                       |
| <i>LOC100520426</i> | leucine carboxyl methyltransferase 1 (LOC100520426; LCMT1)                                                             | <i>GPX8</i>     | glutathione peroxidase 8 (putative)(GPX8)                                                      |
| <i>LOC100521052</i> | mitochondrial inner membrane protease subunit 2(LOC100521052)                                                          | <i>GREB1</i>    | growth regulation by estrogen in breast cancer 1                                               |
| <i>LOC100521189</i> | potassium channel subfamily K member 12                                                                                | <i>GUCY1B3</i>  | guanylate cyclase 1, soluble, beta 3(GUCY1B3)                                                  |
| <i>LOC100521617</i> | myelin and lymphocyte protein(LOC100521617)                                                                            | <i>HCFC2</i>    | host cell factor C2(HCFC2)                                                                     |
| <i>LOC100624445</i> | gamma-glutamylcyclotransferase-like(LOC100624445)                                                                      | <i>HELZ</i>     | helicase with zinc finger(HELZ)                                                                |
| <i>LOC100626307</i> | DNA primase large subunit-like(LOC100626307)                                                                           | <i>HIF1A</i>    | hypoxia inducible factor 1, alpha subunit (basic helix-loop-helix transcription factor)(HIF1A) |
| <i>LOC100736752</i> | palmitoyltransferase ZDHHC13-like                                                                                      | <i>HOXA10</i>   | homeobox A10(HOXA10)                                                                           |
| <i>LOC100737730</i> | integrator complex subunit 4-like                                                                                      | <i>HRH1</i>     | histamine receptor H1(HRH1)                                                                    |
| <i>LOC100738939</i> | nuclear envelope integral membrane protein 1(LOC100738939)                                                             | <i>HSP1L1</i>   | heat shock factor binding protein 1 like 1(HSP1L1)                                             |
| <i>LOC100738957</i> | B9 domain-containing protein 2-like                                                                                    | <i>HSD11B1</i>  | hydroxysteroid 11-beta dehydrogenase 1(HSD11B1)                                                |
| <i>LOC102160697</i> | ADAMTS-like protein 1                                                                                                  | <i>HSD17B11</i> | hydroxysteroid 17-beta dehydrogenase 11(HSD17B11)                                              |
| <i>LOC106504056</i> | two pore calcium channel protein 1-like; two pore calcium channel protein 1 (LOC106504056; LOC100151806; LOC102167997) | <i>HSPA13</i>   | heat shock protein family A (Hsp70) member 13(HSPA13)                                          |
| <i>LOC106504128</i> | R3H domain-containing protein 1-like(LOC106504128)                                                                     | <i>HTR2A</i>    | 5-hydroxytryptamine receptor 2A(HTR2A)                                                         |
| <i>LRRC1</i>        | leucine rich repeat containing 1(LRRC1)                                                                                | <i>HTRA4</i>    | HtrA serine peptidase 4(HTRA4)                                                                 |
| <i>MAP4K2</i>       | mitogen-activated protein kinase kinase kinase kinase 2(MAP4K2)                                                        | <i>IFRD1</i>    | interferon related developmental regulator 1(IFRD1)                                            |
| <i>MPP1</i>         | membrane palmitoylated protein 1(MPP1)                                                                                 | <i>IKBIP</i>    | IKKB interacting protein(IKBIP)                                                                |
| <i>MSLN</i>         | mesothelin(MSLN)                                                                                                       | <i>INPP5F</i>   | inositol polyphosphate-5-phosphatase F(INPP5F)                                                 |

|                  |                                                                        |                     |                                                                                                                                                                                                  |
|------------------|------------------------------------------------------------------------|---------------------|--------------------------------------------------------------------------------------------------------------------------------------------------------------------------------------------------|
| <i>MTMR7</i>     | myotubularin related protein 7(MTMR7)                                  | <i>ISG12(A)</i>     | putative ISG12(a) protein(ISG12(A))                                                                                                                                                              |
| <i>NCKIPSD</i>   | NCK interacting protein with SH3 domain(NCKIPSD)                       | <i>KCTD9</i>        | potassium channel tetramerization domain containing 9(KCTD9)                                                                                                                                     |
| <i>NCOR2</i>     | nuclear receptor corepressor 2(NCOR2)                                  | <i>KDELR3</i>       | KDEL endoplasmic reticulum protein retention receptor 3(KDELR3)                                                                                                                                  |
| <i>NDUFA10</i>   | NADH:ubiquinone oxidoreductase subunit A10(NDUFA10)                    | <i>KIFAP3</i>       | kinesin associated protein 3(KIFAP3)                                                                                                                                                             |
| <i>NDUFV1</i>    | NADH:ubiquinone oxidoreductase core subunit VI(NDUFV1)                 | <i>LOC100152428</i> | multidrug resistance-associated protein 1-like(LOC100152428)                                                                                                                                     |
| <i>NFIX</i>      | nuclear factor 1 X(NFIX)                                               | <i>LOC100153395</i> | fibronectin type III domain-containing protein 3B; fibronectin type III domain-containing protein 3B-like; uncharacterized LOC106504256 (LOC100153395; LOC100519977; LOC100625867; LOC106504256) |
| <i>NIPSNAP1</i>  | nipsnap homolog 1 (C. elegans)(NIPSNAP1)                               | <i>LOC100157647</i> | pleckstrin homology domain-containing family A member 1; pleckstrin homology domain-containing family A member 1-like (LOC100157647; LOC100625949)                                               |
| <i>NIPSNAP3A</i> | nipsnap homolog 3A(NIPSNAP3A)                                          | <i>LOC100157704</i> | olfactory receptor 1L8-like(LOC100157704)                                                                                                                                                        |
| <i>NTRK3</i>     | neurotrophic receptor tyrosine kinase 3(NTRK3)                         | <i>LOC100511013</i> | protein GREB1                                                                                                                                                                                    |
| <i>NUDT14</i>    | nudix hydrolase 14(NUDT14)                                             | <i>LOC100512644</i> | uncharacterized LOC100512644(LOC100512644)                                                                                                                                                       |
| <i>OLFML2A</i>   | olfactomedin like 2A(OLFML2A)                                          | <i>LOC100515061</i> | probable glutathione peroxidase 8; glutathione peroxidase 8 (putative) (LOC100515061; GPX8)                                                                                                      |
| <i>PCBD1</i>     | pterin-4 alpha-carbinolamine dehydratase 1(PCBD1)                      | <i>LOC100515833</i> | FYVE, RhoGEF and PH domain-containing protein 6-like; FYVE, RhoGEF and PH domain-containing protein 6 (LOC100515833; LOC100517825)                                                               |
| <i>PDF</i>       | peptide deformylase (mitochondrial)(PDF)                               | <i>LOC100516665</i> | protocadherin gamma-C3; protocadherin gamma-A11; protocadherin gamma-A2-like; protocadherin gamma-B5-like (100736974; LOC106509588; LOC100737660)                                                |
| <i>PDGFD</i>     | platelet derived growth factor D(PDGFD)                                | <i>LOC100517015</i> | cAMP-dependent protein kinase inhibitor beta-like(LOC100517015)                                                                                                                                  |
| <i>PLD2</i>      | phospholipase D2(PLD2)                                                 | <i>LOC100517735</i> | chondroitin sulfate N-acetylgalactosaminyltransferase 1(LOC100517735)                                                                                                                            |
| <i>PLXDC1</i>    | plexin domain containing 1(PLXDC1)                                     | <i>LOC100517820</i> | proteasome activator complex subunit 4(LOC100517820)                                                                                                                                             |
| <i>POFUT1</i>    | protein O-fucosyltransferase 1(POFUT1)                                 | <i>LOC100517940</i> | apolipoprotein L3-like                                                                                                                                                                           |
| <i>POLR1A</i>    | RNA polymerase I subunit A(POLR1A)                                     | <i>LOC100518433</i> | tetratricopeptide repeat protein 39A                                                                                                                                                             |
| <i>POLR1D</i>    | RNA polymerase I subunit D(POLR1D)                                     | <i>LOC100518541</i> | A disintegrin and metalloproteinase with thrombospondin motifs 19-like; A disintegrin and metalloproteinase with thrombospondin motifs 19 (LOC100518541; LOC100518181)                           |
| <i>PRPSAP1</i>   | phosphoribosyl pyrophosphate synthetase associated protein 1(PRPSAP1)  | <i>LOC100518720</i> | chondroitin sulfate synthase 3(LOC100518720)                                                                                                                                                     |
| <i>PRR3</i>      | proline rich 3(PRR3)                                                   | <i>LOC100520066</i> | geranylgeranyl transferase type-1 subunit beta                                                                                                                                                   |
| <i>RAB3IP</i>    | RAB3A interacting protein(RAB3IP)                                      | <i>LOC100520265</i> | protocadherin-9(LOC100520265)                                                                                                                                                                    |
| <i>RARG</i>      | retinoic acid receptor gamma(RARG)                                     | <i>LOC100525491</i> | rho GTPase-activating protein 7                                                                                                                                                                  |
| <i>RNF167</i>    | ring finger protein 167(RNF167)                                        | <i>LOC100525519</i> | anoctamin-4                                                                                                                                                                                      |
| <i>RNF4</i>      | ring finger protein 4(RNF4)                                            | <i>LOC100623063</i> | protein FAM69A-like; family with sequence similarity 69, member A (LOC100623063; FAM69A)                                                                                                         |
| <i>RREB1</i>     | ras responsive element binding protein 1(RREB1)                        | <i>LOC100736857</i> | microphthalmia-associated transcription factor-like(LOC100736857)                                                                                                                                |
| <i>RUFY1</i>     | RUN and FYVE domain containing 1(RUFY1)                                | <i>LOC100737666</i> | collagen alpha-1(XVI) chain(LOC100737666)                                                                                                                                                        |
| <i>SAMD1</i>     | sterile alpha motif domain containing 1                                | <i>LOC100737852</i> | peptidyl-prolyl cis-trans isomerase C-like                                                                                                                                                       |
| <i>SLC15A1</i>   | solute carrier family 15 member 1(SLC15A1)                             | <i>LOC100738213</i> | collagen alpha-1(I) chain                                                                                                                                                                        |
| <i>SLC35F1</i>   | solute carrier family 35 member F1(SLC35F1)                            | <i>LOC100738373</i> | epidermal growth factor receptor kinase substrate 8-like(LOC100738373)                                                                                                                           |
| <i>SLC44A1</i>   | solute carrier family 44 member 1(SLC44A1)                             | <i>LOC100738400</i> | ubiquitin-conjugating enzyme E2 E2                                                                                                                                                               |
| <i>SLC7A7</i>    | solute carrier family 7 member 7(SLC7A7)                               | <i>LOC100739719</i> | tetraspanin-6(LOC100739719)                                                                                                                                                                      |
| <i>SPR</i>       | sepiapterin reductase (7,8-dihydrobiopterin:NADP+ oxidoreductase)(SPR) | <i>LOC100739763</i> | LOC100739763                                                                                                                                                                                     |
| <i>SRCAP</i>     | Snf2 related CREBBP activator protein(SRCAP)                           | <i>LOC100739844</i> | semaphorin-3A-like(LOC100739844)                                                                                                                                                                 |
| <i>STARD10</i>   | STAR related lipid transfer domain containing 10(STARD10)              | <i>LOC102157535</i> | 40S ribosomal protein S6 pseudogene                                                                                                                                                              |
| <i>STRIP2</i>    | striatin interacting protein 2(STRIP2)                                 | <i>LOC102161149</i> | melanoma inhibitory activity protein 3-like (LOC102161149; LOC100520445)                                                                                                                         |
| <i>STX10</i>     | syntaxin 10(STX10)                                                     | <i>LOC102161405</i> | uncharacterized LOC102161405                                                                                                                                                                     |
| <i>TBLIX</i>     | transducin beta like 1X-linked(TBLIX)                                  | <i>LOC102162328</i> | uncharacterized LOC102162328                                                                                                                                                                     |
| <i>TDP1</i>      | tyrosyl-DNA phosphodiesterase 1(TDP1)                                  | <i>LOC102163342</i> | A disintegrin and metalloproteinase with thrombospondin motifs 19-like                                                                                                                           |
| <i>TENM2</i>     | teneurin transmembrane protein 2(TENM2)                                | <i>LOC102164530</i> | collagen alpha-1(XV) chain                                                                                                                                                                       |
| <i>TET3</i>      | tet methylcytosine dioxygenase 3(TET3)                                 | <i>LOC102164566</i> | uncharacterized LOC102164566                                                                                                                                                                     |
| <i>TMEM164</i>   | transmembrane protein 164                                              | <i>LOC102164569</i> | pro-neuregulin-1, membrane-bound isoform-like; pro-neuregulin-3, membrane-bound isoform-like (LOC102164569; LOC100620584)                                                                        |
| <i>TRAF1</i>     | TNF receptor associated protein 1(TRAF1)                               | <i>LOC102165708</i> | uncharacterized LOC102165708                                                                                                                                                                     |
| <i>TRIM9</i>     | tripartite motif containing 9(TRIM9)                                   | <i>LOC102165740</i> | uncharacterized LOC102165740                                                                                                                                                                     |

|                |                                                                                           |                     |                                                                                                                                                                   |
|----------------|-------------------------------------------------------------------------------------------|---------------------|-------------------------------------------------------------------------------------------------------------------------------------------------------------------|
| <i>UBP1</i>    | upstream binding protein 1 (LBP-1a)(UBP1)                                                 | <i>LOC106504075</i> | proton myo-inositol cotransporter; uncharacterized LOC100520492 (LOC106504075; LOC100520492)                                                                      |
| <i>UBQLN4</i>  | ubiquilin 4(UBQLN4)                                                                       | <i>LOC106504251</i> | multidrug resistance protein 1-like (LOC106504251; LOC100522455)                                                                                                  |
| <i>UNC13D</i>  | unc-13 homolog D(UNC13D)                                                                  | <i>LOC106508947</i> | collagen alpha-1(XII) chain-like; collagen alpha-1(XII) chain (LOC106508947; LOC106508948; LOC100156689)                                                          |
| <i>USP2</i>    | ubiquitin specific peptidase 2(USP2)                                                      | <i>LOC397380</i>    | uncharacterized LOC397380                                                                                                                                         |
| <i>VEGFB</i>   | vascular endothelial growth factor B(VEGFB)                                               | <i>LOC397571</i>    | collagen alpha-1(I) chain                                                                                                                                         |
| <i>WN17A</i>   | Wnt family member 7A(WN17A)                                                               | <i>LRRC17</i>       | leucine rich repeat containing 17; leucine-rich repeat-containing protein 17-like; leucine-rich repeat-containing protein 17 (LRRC17; LOC100513808; LOC100513611) |
| <i>WRAP73</i>  | WD repeat containing, antisense to TP73(WRAP73)                                           | <i>LYSMD3</i>       | LysM domain containing 3(LYSMD3)                                                                                                                                  |
| <i>ZBTB7C</i>  | zinc finger and BTB domain containing 7C(ZBTB7C)                                          | <i>MAGED1</i>       | MAGE family member D1(MAGED1)                                                                                                                                     |
| <i>ZCCHC14</i> | zinc finger CCHC-type containing 14(ZCCHC14)                                              | <i>MAN2A1</i>       | mannosidase alpha class 2A member 1(MAN2A1)                                                                                                                       |
| <i>ZMYM3</i>   | zinc finger MYM-type containing 3(ZMYM3)                                                  | <i>MARCH-5</i>      | membrane-associated ring finger (C3HC4) 5                                                                                                                         |
| <i>ZNF185</i>  | zinc finger protein 185 (LIM domain); zinc finger protein 185-like (ZNF185; LOC100737297) | <i>MARCKS</i>       | myristoylated alanine rich protein kinase C substrate(MARCKS)                                                                                                     |
| <i>ZSWIM1</i>  | zinc finger SWIM-type containing 1(ZSWIM1)                                                | <i>ME1</i>          | malic enzyme 1(ME1)                                                                                                                                               |
|                |                                                                                           | <i>MFAP2</i>        | microfibrillar associated protein 2(MFAP2)                                                                                                                        |
|                |                                                                                           | <i>MGAT4D</i>       | MGAT4 family member D(MGAT4D)                                                                                                                                     |
|                |                                                                                           | <i>MIR671</i>       | microRNA mir-671; chondroitin polymerizing factor 2 (MIR671; CHIPF2)                                                                                              |
|                |                                                                                           | <i>MMP1</i>         | matrix metalloproteinase 1(MMP1)                                                                                                                                  |
|                |                                                                                           | <i>MMP3</i>         | matrix metalloproteinase 3 (stromelysin 1, progelatinase)(MMP3)                                                                                                   |
|                |                                                                                           | <i>MON2</i>         | MON2 homolog, regulator of endosome-to-Golgi trafficking(MON2)                                                                                                    |
|                |                                                                                           | <i>MORC3</i>        | MORC family CW-type zinc finger 3(MORC3)                                                                                                                          |
|                |                                                                                           | <i>MOSPD1</i>       | motile sperm domain containing 1(MOSPD1)                                                                                                                          |
|                |                                                                                           | <i>MRC2</i>         | mannose receptor C type 2(MRC2)                                                                                                                                   |
|                |                                                                                           | <i>MXRA5</i>        | matrix remodeling associated 5(MXRA5)                                                                                                                             |
|                |                                                                                           | <i>NCEH1</i>        | neutral cholesterol ester hydrolase 1(NCEH1)                                                                                                                      |
|                |                                                                                           | <i>NPR2</i>         | natriuretic peptide receptor B/guanylate cyclase B (atrionatriuretic peptide receptor B)(NPR2)                                                                    |
|                |                                                                                           | <i>OLFM3</i>        | olfactomedin 3(OLFM3)                                                                                                                                             |
|                |                                                                                           | <i>OMD</i>          | osteomodulin(OMD)                                                                                                                                                 |
|                |                                                                                           | <i>PDIA3</i>        | protein disulfide isomerase family A member 3(PDIA3)                                                                                                              |
|                |                                                                                           | <i>PDP1</i>         | pyruvate dehydrogenase phosphatase catalytic subunit 1(PDP1)                                                                                                      |
|                |                                                                                           | <i>PELO</i>         | pelota homolog (Drosophila)(PELO)                                                                                                                                 |
|                |                                                                                           | <i>PLAU</i>         | plasminogen activator, urokinase(PLAU)                                                                                                                            |
|                |                                                                                           | <i>PLAUR</i>        | plasminogen activator, urokinase receptor(PLAUR)                                                                                                                  |
|                |                                                                                           | <i>PLEKHA8</i>      | pleckstrin homology domain containing A8(PLEKHA8)                                                                                                                 |
|                |                                                                                           | <i>PLOD2</i>        | procollagen-lysine,2-oxoglutarate 5-dioxygenase 2(PLOD2)                                                                                                          |
|                |                                                                                           | <i>PMAIP1</i>       | phorbol-12-myristate-13-acetate-induced protein 1(PMAIP1)                                                                                                         |
|                |                                                                                           | <i>PPAP2A</i>       | protein phosphatase 3 catalytic subunit gamma(PPP3CC)                                                                                                             |
|                |                                                                                           | <i>PPP3CC</i>       | protein phosphatase 4 regulatory subunit 4(PPP4R4)                                                                                                                |
|                |                                                                                           | <i>PPP4R4</i>       | PR/SET domain 1(PRD1)                                                                                                                                             |
|                |                                                                                           | <i>PRDM1</i>        | prion protein(PRN1)                                                                                                                                               |
|                |                                                                                           | <i>PRNP</i>         | protease, serine 23(PRSS23)                                                                                                                                       |
|                |                                                                                           | <i>PRSS23</i>       | prostaglandin F receptor(PTGFR)                                                                                                                                   |
|                |                                                                                           | <i>PTGFR</i>        | RAS like family 12(RASL12)                                                                                                                                        |
|                |                                                                                           | <i>RASL12</i>       | regulator of calcineurin 2(RCAN2)                                                                                                                                 |
|                |                                                                                           | <i>RCAN2</i>        | RNA exonuclease 2(REXO2)                                                                                                                                          |
|                |                                                                                           | <i>REXO2</i>        | Rho family GTPase 3(RND3)                                                                                                                                         |
|                |                                                                                           | <i>RND3</i>         | ring finger protein 11(RNF11)                                                                                                                                     |
|                |                                                                                           | <i>RNF11</i>        | ribosomal protein S6 kinase A6(RPS6KA6)                                                                                                                           |
|                |                                                                                           | <i>RNF24</i>        | sphingosine-1-phosphate receptor 3(S1PR3)                                                                                                                         |
|                |                                                                                           | <i>RPS6KA6</i>      | syndecan 2(SDC2)                                                                                                                                                  |
|                |                                                                                           | <i>S1PR3</i>        | Sec23 homolog A, coat complex II component(SEC23A)                                                                                                                |
|                |                                                                                           | <i>SDC2</i>         | Sec23 homolog B, coat complex II component(SEC23B)                                                                                                                |
|                |                                                                                           | <i>SEC23A</i>       | SEC63 homolog, protein translocation regulator(SEC63)                                                                                                             |
|                |                                                                                           | <i>SEC23B</i>       | solute carrier family 30 member 7(SLC30A7)                                                                                                                        |
|                |                                                                                           | <i>SEC63</i>        | solute carrier family 38 member 1(SLC38A1)                                                                                                                        |

|  |                 |                                                                                                  |
|--|-----------------|--------------------------------------------------------------------------------------------------|
|  | <i>SELK</i>     | solute carrier family 38 member 2(SLC38A2)                                                       |
|  | <i>SLC30A7</i>  | solute carrier family 39 member 7(SLC39A7)                                                       |
|  | <i>SLC38A1</i>  | solute carrier family 41 member 2(SLC41A2)                                                       |
|  | <i>SLC38A2</i>  | solute carrier organic anion transporter family, member 2A1(SLCO2A1)                             |
|  | <i>SLC39A7</i>  | secreted protein, acidic, cysteine-rich (osteonectin)(SPARC)                                     |
|  | <i>SLC41A2</i>  | sushi repeat containing protein, X-linked 2(SRPX2)                                               |
|  | <i>SLCO2A1</i>  | STEAP2 metalloredutase(STEAP2)                                                                   |
|  | <i>SPARC</i>    | secreted protein, acidic, cysteine-rich (osteonectin); SPARC (SPARC; LOC100737020; LOC100514136) |
|  | <i>SRPX2</i>    | sushi-repeat containing protein, X-linked 2                                                      |
|  | <i>STEAP2</i>   | STEAP family member 2, metalloredutase; metalloredutase STEAP2 (STEAP2; LOC100624711)            |
|  | <i>SVEP1</i>    | sushi, von Willebrand factor type A, EGF and pentraxin domain containing 1(SVEP1)                |
|  | <i>TAC3</i>     | tachykinin 3(TAC3)                                                                               |
|  | <i>TCF7L2</i>   | transcription factor 7 like 2(TCF7L2)                                                            |
|  | <i>TDG</i>      | thymine-DNA glycosylase(TDG)                                                                     |
|  | <i>TGM2</i>     | transglutaminase 2(TGM2)                                                                         |
|  | <i>TMEM170B</i> | transmembrane protein 170B(TMEM170B)                                                             |
|  | <i>TMEM263</i>  | transmembrane protein 263(TMEM263)                                                               |
|  | <i>TMEM35</i>   | transmembrane protein 35                                                                         |
|  | <i>TRIB2</i>    | tribbles pseudokinase 2                                                                          |
|  | <i>TSPAN9</i>   | tetraspanin 9(TSPAN9)                                                                            |
|  | <i>TTC39B</i>   | tetratricopeptide repeat domain 39B(TTC39B)                                                      |
|  | <i>TVP23B</i>   | trans-golgi network vesicle protein 23 homolog B(TVP23B)                                         |
|  | <i>UBL3</i>     | ubiquitin like 3(UBL3)                                                                           |
|  | <i>UCAL-P19</i> | uterocalin P19(UCAL-P19)                                                                         |
|  | <i>UGGT2</i>    | UDP-glucose glycoprotein glucosyltransferase 2(UGGT2)                                            |
|  | <i>VCAN</i>     | versican(VCAN)                                                                                   |
|  | <i>VGLL3</i>    | vestigial like family member 3(VGLL3)                                                            |
|  | <i>VSTM4</i>    | V-set and transmembrane domain containing 4(VSTM4)                                               |
|  | <i>WDR72</i>    | WD repeat domain 72                                                                              |
|  | <i>WFDC9</i>    | WAP four-disulfide core domain 9(WFDC9)                                                          |
|  | <i>WIP1</i>     | WD repeat domain, phosphoinositide interacting 1(WIP1)                                           |
|  | <i>WNT2</i>     | Wnt family member 2(WNT2)                                                                        |
|  | <i>ZBTB38</i>   | zinc finger and BTB domain containing 38(ZBTB38)                                                 |
|  | <i>ZFAND5</i>   | zinc finger AN1-type containing 5(ZFAND5)                                                        |
|  | <i>ZNF516</i>   | zinc finger protein 516(ZNF516)                                                                  |



**Supplementary Table 3.** List (akronym and description) of differentially expressed genes ( $P < 0.05$ ) solely related to copulation, in pig proximal endometrium (ProxUt) up- or down-regulated.

| UP                  |                                                                                                         | DOWN               |                                                                                                               |
|---------------------|---------------------------------------------------------------------------------------------------------|--------------------|---------------------------------------------------------------------------------------------------------------|
| <i>ADHFE1</i>       | alcohol dehydrogenase, iron containing 1(ADHFE1)                                                        | <i>ABCB1</i>       | ATP-binding cassette, sub-family B (MDR/TAP), member 1(ABCB1)                                                 |
| <i>ADRA1A</i>       | adrenoceptor alpha 1A(ADRA1A)                                                                           | <i>ABHD2</i>       | abhydrolase domain containing 2(ABHD2)                                                                        |
| <i>ADRA2A</i>       | adrenoceptor alpha 2A(ADRA2A)                                                                           | <i>ACKR3</i>       | atypical chemokine receptor 3(ACKR3)                                                                          |
| <i>ALDH2</i>        | aldehyde dehydrogenase 2 family (mitochondrial)(ALDH2)                                                  | <i>ADAM12</i>      | ADAM metallopeptidase domain 12(ADAM12)                                                                       |
| <i>ALOXE3</i>       | arachidonate lipoxigenase 3                                                                             | <i>ADAM22</i>      | ADAM metallopeptidase domain 22(ADAM22)                                                                       |
| <i>ANKRD23</i>      | ankyrin repeat domain 23(ANKRD23)                                                                       | <i>ADAMTS9</i>     | ADAM metallopeptidase with thrombospondin type 1 motif 9(ADAMTS9)                                             |
| <i>ASGR2</i>        | asialoglycoprotein receptor 2(ASGR2)                                                                    | <i>ADD3</i>        | adducin 3(ADD3)                                                                                               |
| <i>C15H2orf72</i>   | chromosome 15 open reading frame, human C2orf72                                                         | <i>AFF2</i>        | AF4/FMR2 family member 2(AFF2)                                                                                |
| <i>CIH15orf52</i>   | chromosome 1 open reading frame, human C15orf52                                                         | <i>AGR2</i>        | anterior gradient 2, protein disulphide isomerase family member(AGR2)                                         |
| <i>C4H1orf110</i>   | chromosome 4 open reading frame, human C1orf110                                                         | <i>AGTR1</i>       | angiotensin II receptor type 1(AGTR1)                                                                         |
| <i>CALM1</i>        | calmodulin 1(CALM1)                                                                                     | <i>AMMECR1</i>     | Alport syndrome, mental retardation, midface hypoplasia and elliptocytosis chromosomal region gene 1(AMMECR1) |
| <i>CD207</i>        | CD207 molecule, langerin(CD207)                                                                         | <i>ATAD2B</i>      | beta-1,3-galactosyltransferase 2(B3GALT2)                                                                     |
| <i>CELF4</i>        | CUGBP, Elav-like family member 4(CELF4)                                                                 | <i>B3GALT2</i>     | UDP-GlcNAc:betaGal beta-1,3-N-acetylglucosaminyltransferase 2(B3GNT2)                                         |
| <i>CEP250</i>       | centrosome-associated protein CEP250-like; centrosomal protein 250kDa (LOC100521166; CEP250)            | <i>B3GNT2</i>      | beta-1,4-galactosyltransferase 1(B4GALT1)                                                                     |
| <i>CHCHD10</i>      | coiled-coil-helix-coiled-coil-helix domain containing 10(CHCHD10)                                       | <i>B4GALT1</i>     | bone morphogenetic protein 1(BMP1)                                                                            |
| <i>CHST4</i>        | carbohydrate sulfotransferase 4(CHST4)                                                                  | <i>BMP1</i>        | BMP/retinoic acid inducible neural specific 2(BRINP2)                                                         |
| <i>CNTROB</i>       | centrobin, centriole duplication and spindle assembly protein(CNTROB)                                   | <i>BRINP2</i>      | bone morphogenetic protein/retinoic acid inducible neural-specific 2                                          |
| <i>CRACR2A</i>      | calcium release activated channel regulator 2A                                                          | <i>C7H14orf119</i> | chromosome 7 open reading frame, human C14orf119(C7H14orf119)                                                 |
| <i>CRYL1</i>        | crystallin lambda 1(CRYL1)                                                                              | <i>CCDC160</i>     | coiled-coil domain containing 160(CCDC160)                                                                    |
| <i>CTXN3</i>        | cortixin 3(CTXN3)                                                                                       | <i>CDH11</i>       | cadherin 11(CDH11)                                                                                            |
| <i>DDB1</i>         | damage specific DNA binding protein 1(DDB1)                                                             | <i>CHIC2</i>       | cysteine rich hydrophobic domain 2(CHIC2)                                                                     |
| <i>DEAF1</i>        | DEAF1, transcription factor(DEAF1)                                                                      | <i>CHSY3</i>       | chondroitin sulfate synthase 3(CHSY3)                                                                         |
| <i>DGAT1</i>        | diacylglycerol O-acyltransferase 1(DGAT1)                                                               | <i>CLDN11</i>      | claudin 11(CLDN11)                                                                                            |
| <i>FAM117A</i>      | family with sequence similarity 117 member A(FAM117A)                                                   | <i>CLDND1</i>      | claudin domain containing 1(CLDND1)                                                                           |
| <i>FIGF</i>         | c-fos induced growth factor (vascular endothelial growth factor D)                                      | <i>CLIC2</i>       | chloride intracellular channel 2(CLIC2)                                                                       |
| <i>GALK1</i>        | galactokinase 1(GALK1)                                                                                  | <i>CLINT1</i>      | clathrin interactor 1(CLINT1)                                                                                 |
| <i>GCM2</i>         | glial cells missing homolog 2 (Drosophila)                                                              | <i>COL1A2</i>      | collagen type I alpha 2 chain(COL1A2)                                                                         |
| <i>GFRA1</i>        | GDNF family receptor alpha 1                                                                            | <i>COL3A1</i>      | collagen type III alpha 1 chain(COL3A1)                                                                       |
| <i>GPR26</i>        | G protein-coupled receptor 26(GPR26)                                                                    | <i>COL7A1</i>      | collagen type VII alpha 1 chain(COL7A1)                                                                       |
| <i>GRK1</i>         | G protein-coupled receptor kinase 1(GRK1)                                                               | <i>CPQ</i>         | carboxypeptidase Q; carboxypeptidase Q-like (CPQ; LOC106508327; LOC102163803)                                 |
| <i>HOXD12</i>       | homeobox D12(HOXD12)                                                                                    | <i>CPXM1</i>       | carboxypeptidase X, M14 family member 1(CPXM1)                                                                |
| <i>HSF1</i>         | heat shock transcription factor 1(HSF1)                                                                 | <i>CREB3L1</i>     | cAMP responsive element binding protein 3 like 1(CREB3L1)                                                     |
| <i>HSPB1</i>        | heat shock protein family B (small) member 1(HSPB1)                                                     | <i>CREB3L2</i>     | cAMP responsive element binding protein 3 like 2(CREB3L2)                                                     |
| <i>IL17D</i>        | interleukin 17D(IL17D)                                                                                  | <i>CRISPLD2</i>    | cysteine rich secretory protein LCCL domain containing 2(CRISPLD2)                                            |
| <i>JADE3</i>        | jade family PHD finger 3(JADE3)                                                                         | <i>CRYGS</i>       | crystallin gamma S(CRYGS)                                                                                     |
| <i>JAZF1</i>        | JAZF zinc finger 1(JAZF1)                                                                               | <i>DAP</i>         | death-associated protein                                                                                      |
| <i>KCNQ4</i>        | potassium voltage-gated channel subfamily Q member 4(KCNQ4)                                             | <i>DCLRE1A</i>     | DNA cross-link repair 1A(DCLRE1A)                                                                             |
| <i>KHK</i>          | ketohexokinase(KHK)                                                                                     | <i>DCTD</i>        | dCMP deaminase(DCTD)                                                                                          |
| <i>LCN10</i>        | lipocalin 10(LCN10)                                                                                     | <i>DMP1</i>        | dentin matrix acidic phosphoprotein 1(DMP1)                                                                   |
| <i>LIM2</i>         | lens intrinsic membrane protein 2(LIM2)                                                                 | <i>DRAM1</i>       | DNA damage regulated autophagy modulator 1(DRAM1)                                                             |
| <i>LOC100152736</i> | zinc finger protein 142(LOC100152736)                                                                   | <i>ECE1</i>        | endothelin converting enzyme 1(ECE1)                                                                          |
| <i>LOC100155148</i> | mitochondrial intermediate peptidase                                                                    | <i>ELF4</i>        | E74 like ETS transcription factor 4(ELF4)                                                                     |
| <i>LOC100511353</i> | A disintegrin and metalloproteinase with thrombospondin motifs 12                                       | <i>ENPEP</i>       | glutamyl aminopeptidase(ENPEP)                                                                                |
| <i>LOC100511598</i> | WD repeat-containing protein 17-like                                                                    | <i>ENTPD5</i>      | ectonucleoside triphosphate diphosphohydrolase 5(ENTPD5)                                                      |
| <i>LOC100513291</i> | butyrophilin, subfamily 1, member; butyrophilin subfamily 3 member A2-like (LOC100513291; LOC106504090) | <i>EPAS1</i>       | endothelial PAS domain protein 1(EPAS1)                                                                       |

|              |                                                                                                                                                                     |  |              |                                                                                                                                                                                                  |
|--------------|---------------------------------------------------------------------------------------------------------------------------------------------------------------------|--|--------------|--------------------------------------------------------------------------------------------------------------------------------------------------------------------------------------------------|
| LOC100513769 | taste receptor type 2 member 16                                                                                                                                     |  | EPHA4        | EPH receptor A4(EPHA4)                                                                                                                                                                           |
| LOC100515137 | 5-oxoprolinase-like(LOC100515137)                                                                                                                                   |  | ERCC6        | ERCC excision repair 6, chromatin remodeling factor(ERCC6)                                                                                                                                       |
| LOC100515312 | C2 calcium-dependent domain-containing protein 4D-like(LOC100515312)                                                                                                |  | ERLEC1       | endoplasmic reticulum lectin 1(ERLEC1)                                                                                                                                                           |
| LOC100516511 | olfactory receptor 1A1(LOC100516511)                                                                                                                                |  | ERP44        | endoplasmic reticulum protein 44(ERP44)                                                                                                                                                          |
| LOC100516539 | splicing factor 3A subunit 2(LOC100516539)                                                                                                                          |  | EXOC5        | exocyst complex component 5(EXOC5)                                                                                                                                                               |
| LOC100517804 | putative olfactory receptor 5AK3(LOC100517804)                                                                                                                      |  | FAM111A      | family with sequence similarity 111 member A(FAM111A)                                                                                                                                            |
| LOC100521466 | olfactory receptor 52L1(LOC100521466)                                                                                                                               |  | FAM114A1     | family with sequence similarity 114 member A1(FAM114A1)                                                                                                                                          |
| LOC100524975 | olfactory receptor 10H1(LOC100524975)                                                                                                                               |  | FAM171B      | family with sequence similarity 171 member B(FAM171B)                                                                                                                                            |
| LOC100626192 | sodium-dependent proline transporter-like                                                                                                                           |  | FAP          | fibroblast activation protein alpha(FAP)                                                                                                                                                         |
| LOC100627836 | uncharacterized LOC100627836                                                                                                                                        |  | FBLN1        | fibulin 1(FBLN1)                                                                                                                                                                                 |
| LOC100737030 | keratin, type I cytoskeletal 42                                                                                                                                     |  | FBN1         | fibillin 1(FBN1)                                                                                                                                                                                 |
| LOC100737805 | SUN domain-containing protein 1-like(LOC100737805)                                                                                                                  |  | FBXL5        | F-box and leucine rich repeat protein 5(FBXL5)                                                                                                                                                   |
| LOC100737809 | ras-specific guanine nucleotide-releasing factor RalGPS2-like; Ral GEF with PH domain and SH3 binding motif 2 (LOC100737809; RALGPS2)                               |  | FGFBP1       | fibroblast growth factor binding protein 1(FGFBP1)                                                                                                                                               |
| LOC100738970 | CXXC-type zinc finger protein 4(LOC100738970)                                                                                                                       |  | FGFR1OP2     | FGFR1 oncogene partner 2(FGFR1OP2)                                                                                                                                                               |
| LOC100739011 | putative lipoyltransferase 2, mitochondrial(LOC100739011)                                                                                                           |  | FKBP10       | FK506 binding protein 10, 65 kDa                                                                                                                                                                 |
| LOC102160697 | ADAMTS-like protein 1                                                                                                                                               |  | FKBP7        | FK506 binding protein 7(FKBP7)                                                                                                                                                                   |
| LOC102161977 | ral guanine nucleotide dissociation stimulator-like (LOC102161977; LOC106504274)                                                                                    |  | FRZB         | frizzled-related protein(FRZB)                                                                                                                                                                   |
| LOC102162013 | calcium-binding mitochondrial carrier protein ScaMC-3-like; solute carrier family 25 (mitochondrial carrier; phosphate carrier), member 23 (LOC102162013; SLC25A23) |  | GCNT3        | glucosaminyl (N-acetyl) transferase 3, mucin type(GCNT3)                                                                                                                                         |
| LOC102164149 | uncharacterized LOC102164149                                                                                                                                        |  | GJA1         | gap junction protein alpha 1(GJA1)                                                                                                                                                               |
| LOC102164150 | neuronal PAS domain-containing protein 2-like; neuronal PAS domain protein 2 (LOC102164150; NPAS2)                                                                  |  | GLB1L        | galactosidase beta 1 like(GLB1L)                                                                                                                                                                 |
| LOC106506271 | sodium channel protein type 1 subunit alpha-like                                                                                                                    |  | GMNN         | geminin, DNA replication inhibitor(GMNN)                                                                                                                                                         |
| LOC106506828 | uncharacterized LOC106506828; WAS/WASL interacting protein family, member 3 (LOC106506828; WIPF3)                                                                   |  | GNAI1        | G protein subunit alpha 1(GNAI1)                                                                                                                                                                 |
| MAPT         | microtubule associated protein tau(MAPT)                                                                                                                            |  | GOLGA5       | golgin A5(GOLGA5)                                                                                                                                                                                |
| MIR193A      | microRNA mir-193a                                                                                                                                                   |  | GORAB        | golgin, RAB6-interacting                                                                                                                                                                         |
| MIR30A       | microRNA mir-30a                                                                                                                                                    |  | GPD2         | glycerol-3-phosphate dehydrogenase 2(GPD2)                                                                                                                                                       |
| MIR99B       | microRNA mir-99b                                                                                                                                                    |  | GPX8         | glutathione peroxidase 8 (putative)(GPX8)                                                                                                                                                        |
| MLXIP        | MLX interacting protein(MLXIP)                                                                                                                                      |  | HOXA10       | homeobox A10(HOXA10)                                                                                                                                                                             |
| MST1         | macrophage stimulating 1(MST1)                                                                                                                                      |  | HSD11B1      | hydroxysteroid 11-beta dehydrogenase 1(HSD11B1)                                                                                                                                                  |
| MTMR7        | myotubularin related protein 7(MTMR7)                                                                                                                               |  | HSPA13       | heat shock protein family A (Hsp70) member 13(HSPA13)                                                                                                                                            |
| OTOGL        | otogelin like(OTOGL)                                                                                                                                                |  | HTRA4        | HtrA serine peptidase 4(HTRA4)                                                                                                                                                                   |
| PACSIN3      | protein kinase C and casein kinase substrate in neurons 3(PACSIN3)                                                                                                  |  | IER3         | immediate early response 3(IER3)                                                                                                                                                                 |
| PCBD1        | pterin-4 alpha-carbinolamine dehydratase 1(PCBD1)                                                                                                                   |  | IFI27L2      | interferon, alpha-inducible protein 27-like 2                                                                                                                                                    |
| PGLYRP1      | peptidoglycan recognition protein 1(PGLYRP1)                                                                                                                        |  | IRAK4        | interleukin 1 receptor associated kinase 4(IRAK4)                                                                                                                                                |
| PPAPDC1A     | phosphatidic acid phosphatase type 2 domain containing 1A                                                                                                           |  | ISG12(A)     | putative ISG12(a) protein(ISG12(A))                                                                                                                                                              |
| RHBDL1       | rhomboid like 1(RHBDL1)                                                                                                                                             |  | KDEL3        | KDEL endoplasmic reticulum protein retention receptor 3(KDEL3)                                                                                                                                   |
| RHCG         | Rh family C glycoprotein(RHCG)                                                                                                                                      |  | KDR          | kinase insert domain receptor(KDR)                                                                                                                                                               |
| RNF152       | ring finger protein 152(RNF152)                                                                                                                                     |  | LMAN2        | lectin, mannose binding 2(LMAN2)                                                                                                                                                                 |
| RREB1        | ras responsive element binding protein 1(RREB1)                                                                                                                     |  | LOC100152428 | multidrug resistance-associated protein 1-like(LOC100152428)                                                                                                                                     |
| RTN4RL1      | reticulon 4 receptor like 1(RTN4RL1)                                                                                                                                |  | LOC100153395 | fibronectin type III domain-containing protein 3B; fibronectin type III domain-containing protein 3B-like; uncharacterized LOC106504256 (LOC100153395; LOC100519977; LOC100625867; LOC106504256) |
| RXFP4        | relaxin/insulin like family peptide receptor 4(RXFP4)                                                                                                               |  | LOC100157647 | pleckstrin homology domain-containing family A member 1; pleckstrin homology domain-containing family A member 1-like (LOC100157647; LOC100625949)                                               |
| SDR16C5      | short chain dehydrogenase/reductase family 16C, member 5(SDR16C5)                                                                                                   |  | LOC100512381 | brain-specific angiogenesis inhibitor 3                                                                                                                                                          |
| SERINC5      | serine incorporator 5(SERINC5)                                                                                                                                      |  | LOC100512644 | uncharacterized LOC100512644(LOC100512644)                                                                                                                                                       |
| SERTM1       | serine rich and transmembrane domain containing 1(SERTM1)                                                                                                           |  | LOC100512873 | antileukoproteinase(LOC100512873)                                                                                                                                                                |
| SLC35F1      | solute carrier family 35 member F1(SLC35F1)                                                                                                                         |  | LOC100513074 | serine protease inhibitor Kazal-type 9(LOC100513074)                                                                                                                                             |
| SP7          | Sp7 transcription factor(SP7)                                                                                                                                       |  | LOC100513729 | hippocampus abundant transcript 1 protein                                                                                                                                                        |

|        |                                                                        |              |                                                                                                                                                                   |
|--------|------------------------------------------------------------------------|--------------|-------------------------------------------------------------------------------------------------------------------------------------------------------------------|
| SPR    | sepiapterin reductase (7,8-dihydrobiopterin:NADP+ oxidoreductase)(SPR) | LOC100515061 | glutathione peroxidase 8 (putative); probable glutathione peroxidase 8 (GPX8; LOC100515061)                                                                       |
| SSMEM1 | serine rich single-pass membrane protein 1(SSMEM1)                     | LOC100516193 | uncharacterized LOC100516193; spermatogenesis associated, serine-rich 2 (LOC100516193; SPATS2)                                                                    |
| STK11  | serine/threonine kinase 11(STK11)                                      | LOC100517015 | cAMP-dependent protein kinase inhibitor beta-like(LOC100517015)                                                                                                   |
| THAP10 | THAP domain containing 11(THAP11)                                      | LOC100517569 | lysine-specific demethylase 4C-like (LOC100622077; LOC100517569)                                                                                                  |
| THAP11 | thymosin beta 4, X-linked(TMSB4X)                                      | LOC100518433 | tetratricopeptide repeat protein 39A                                                                                                                              |
| TMSB4X | thymosin beta 4, X-linked(TMSB4X)                                      | LOC100518720 | chondroitin sulfate synthase 3(LOC100518720)                                                                                                                      |
| VIPR1  | vasoactive intestinal peptide receptor 1(VIPR1)                        | LOC100520265 | protocadherin-9(LOC100520265)                                                                                                                                     |
| XAB2   | XPA binding protein 2(XAB2)                                            | LOC100523107 | melanoma-associated antigen D4(LOC100523107)                                                                                                                      |
| XK     | X-linked Kx blood group(XK)                                            | LOC100523528 | protein CASC4-like(LOC100523528)                                                                                                                                  |
| ZNF576 | zinc finger protein 576(ZNF576)                                        | LOC100525121 | neuron navigator 1(LOC100525121)                                                                                                                                  |
| ZNF697 | zinc finger protein 697(ZNF697)                                        | LOC100620725 | piezo-type mechanosensitive ion channel component 2                                                                                                               |
| ZSWIM1 | zinc finger SWIM-type containing 1(ZSWIM1)                             | LOC100623063 | protein FAM69A-like; family with sequence similarity 69, member A (LOC100623063; FAM69A)                                                                          |
|        |                                                                        | LOC100623707 | phosphatidylinositol 3-kinase regulatory subunit alpha-like(LOC100623707)                                                                                         |
|        |                                                                        | LOC100623976 | neuron navigator 1                                                                                                                                                |
|        |                                                                        | LOC100736973 | ras-related protein Rap-1b(LOC100736973)                                                                                                                          |
|        |                                                                        | LOC100737260 | astrotactin-1-like                                                                                                                                                |
|        |                                                                        | LOC100737666 | collagen alpha-1(XVI) chain(LOC100737666)                                                                                                                         |
|        |                                                                        | LOC100737681 | contactin-associated protein-like 2(LOC100737681)                                                                                                                 |
|        |                                                                        | LOC100737852 | peptidyl-prolyl cis-trans isomerase C-like                                                                                                                        |
|        |                                                                        | LOC100738023 | zinc finger protein 705A-like (LOC100738023; LOC100525433)                                                                                                        |
|        |                                                                        | LOC100738213 | collagen alpha-1(I) chain                                                                                                                                         |
|        |                                                                        | LOC100738595 | fibulin-2                                                                                                                                                         |
|        |                                                                        | LOC100738704 | TNFAIP3-interacting protein 3; TNFAIP3-interacting protein 3-like (LOC100738704; LOC106504099)                                                                    |
|        |                                                                        | LOC100739719 | tetraspanin-6(LOC100739719)                                                                                                                                       |
|        |                                                                        | LOC100739844 | semaphorin-3A-like(LOC100739844)                                                                                                                                  |
|        |                                                                        | LOC102157535 | 40S ribosomal protein S6 pseudogene                                                                                                                               |
|        |                                                                        | LOC102161405 | uncharacterized LOC102161405                                                                                                                                      |
|        |                                                                        | LOC102161446 | ras GTPase-activating protein 2-like; ras GTPase-activating protein 2 (LOC102161446; LOC100515414)                                                                |
|        |                                                                        | LOC102164530 | collagen alpha-1(XV) chain                                                                                                                                        |
|        |                                                                        | LOC102164566 | uncharacterized LOC102164566                                                                                                                                      |
|        |                                                                        | LOC102164569 | pro-neuregulin-1, membrane-bound isoform-like (LOC100739280; LOC102164569)                                                                                        |
|        |                                                                        | LOC102165708 | uncharacterized LOC102165708                                                                                                                                      |
|        |                                                                        | LOC102165740 | uncharacterized LOC102165740                                                                                                                                      |
|        |                                                                        | LOC102168155 | succinate--hydroxymethylglutarate CoA-transferase; succinate--hydroxymethylglutarate CoA-transferase pseudogene (LOC102168155; LOC106508407)                      |
|        |                                                                        | LOC106505778 | protein HEG homolog 1-like; HEG homolog 1 (zebrafish) (LOC106505778; HEG1)                                                                                        |
|        |                                                                        | LOC106508945 | uncharacterized LOC106508945; transmembrane protein 30A; uncharacterized LOC100737076 (LOC106508945; TMEM30A; LOC100737076)                                       |
|        |                                                                        | LOC397380    | uncharacterized LOC397380                                                                                                                                         |
|        |                                                                        | LOC397571    | collagen alpha-1(I) chain                                                                                                                                         |
|        |                                                                        | LRRC17       | leucine rich repeat containing 17; leucine-rich repeat-containing protein 17-like; leucine-rich repeat-containing protein 17 (LRRC17; LOC100513808; LOC100513611) |
|        |                                                                        | LUM          | lumican(LUM)                                                                                                                                                      |
|        |                                                                        | MAGED1       | MAGE family member D1(MAGED1)                                                                                                                                     |
|        |                                                                        | MAN1A1       | mannosidase alpha class 1A member 1(MAN1A1)                                                                                                                       |
|        |                                                                        | MAN2A1       | mannosidase alpha class 2A member 1(MAN2A1)                                                                                                                       |
|        |                                                                        | MARCKS       | myristoylated alanine rich protein kinase C substrate(MARCKS)                                                                                                     |
|        |                                                                        | MDFIC        | MyoD family inhibitor domain containing(MDFIC)                                                                                                                    |
|        |                                                                        | MFAP2        | microfibrillar associated protein 2(MFAP2)                                                                                                                        |
|        |                                                                        | MFGES        | milk fat globule-EGF factor 8 protein(MFGES)                                                                                                                      |
|        |                                                                        | MGAT4D       | MGAT4 family member D(MGAT4D)                                                                                                                                     |

|  |  |                 |                                                                      |
|--|--|-----------------|----------------------------------------------------------------------|
|  |  | <i>MIER1</i>    | matrix metallopeptidase 1(MMP1)                                      |
|  |  | <i>MMP1</i>     | MORC family CW-type zinc finger 3(MORC3)                             |
|  |  | <i>MORC3</i>    | mannose receptor C type 2(MRC2)                                      |
|  |  | <i>MRC2</i>     | mannose receptor, C type 2                                           |
|  |  | <i>NCEH1</i>    | neutral cholesterol ester hydrolase 1(NCEH1)                         |
|  |  | <i>NOX4</i>     | NADPH oxidase 4(NOX4)                                                |
|  |  | <i>NSF</i>      | N-ethylmaleimide sensitive factor, vesicle fusing ATPase(NSF)        |
|  |  | <i>OLFM3</i>    | olfactomedin 3(OLFM3)                                                |
|  |  | <i>OLFML3</i>   | olfactomedin like 3(OLFML3)                                          |
|  |  | <i>OMD</i>      | osteomodulin(OMD)                                                    |
|  |  | <i>OSTC</i>     | oligosaccharyltransferase complex non-catalytic subunit(OSTC)        |
|  |  | <i>P2RX7</i>    | purinergic receptor P2X 7(P2RX7)                                     |
|  |  | <i>PDE7B</i>    | phosphodiesterase 7B(PDE7B)                                          |
|  |  | <i>PDP1</i>     | pyruvate dehydrogenase phosphatase catalytic subunit 1(PDP1)         |
|  |  | <i>PLAU</i>     | plasminogen activator, urokinase(PLAU)                               |
|  |  | <i>PLAUR</i>    | plasminogen activator, urokinase receptor(PLAUR)                     |
|  |  | <i>PLEKHG2</i>  | pleckstrin homology and RhoGEF domain containing G2(PLEKHG2)         |
|  |  | <i>PLOD2</i>    | procollagen-lysine,2-oxoglutarate 5-dioxygenase 2(PLOD2)             |
|  |  | <i>PMAIP1</i>   | phorbol-12-myristate-13-acetate-induced protein 1(PMAIP1)            |
|  |  | <i>PPP3CC</i>   | protein phosphatase 3 catalytic subunit gamma(PPP3CC)                |
|  |  | <i>PPP4R4</i>   | protein phosphatase 4 regulatory subunit 4(PPP4R4)                   |
|  |  | <i>PRDM1</i>    | PR/SET domain 1(PRDM1)                                               |
|  |  | <i>PRSS23</i>   | protease, serine 23(PRSS23)                                          |
|  |  | <i>PTPN1</i>    | protein tyrosine phosphatase, non-receptor type 1(PTPN1)             |
|  |  | <i>RAB32</i>    | RAB32, member RAS oncogene family(RAB32)                             |
|  |  | <i>RAB8B</i>    | RAB8B, member RAS oncogene family(RAB8B)                             |
|  |  | <i>RAP2C</i>    | RAP2C, member of RAS oncogene family(RAP2C)                          |
|  |  | <i>RARA</i>     | retinoic acid receptor alpha(RARA)                                   |
|  |  | <i>RNF24</i>    | ring finger protein 24                                               |
|  |  | <i>ROBO2</i>    | roundabout guidance receptor 2(ROBO2)                                |
|  |  | <i>SDC2</i>     | syndecan 2(SDC2)                                                     |
|  |  | <i>SDC4</i>     | syndecan 4(SDC4)                                                     |
|  |  | <i>SEC22B</i>   | SEC22 homolog B, vesicle trafficking protein(SEC22B)                 |
|  |  | <i>SEC23A</i>   | Sec23 homolog A, coat complex II component(SEC23A)                   |
|  |  | <i>SELL</i>     | selectin L(SELL)                                                     |
|  |  | <i>SERPINH1</i> | signal induced proliferation associated 1 like 1(SIPA1L1)            |
|  |  | <i>SIPA1L1</i>  | solute carrier family 12 member 2(SLC12A2)                           |
|  |  | <i>SLC12A2</i>  | solute carrier family 38 member 2(SLC38A2)                           |
|  |  | <i>SLC38A2</i>  | solute carrier family 9 member B1(SLC9B1)                            |
|  |  | <i>SLC9B1</i>   | snail family transcriptional repressor 2(SNAI2)                      |
|  |  | <i>SNAI2</i>    | snail homolog 2 (Drosophila)(SNAI2)                                  |
|  |  | <i>SPARC</i>    | secreted protein, acidic, cysteine-rich (osteonectin)(SPARC)         |
|  |  | <i>SRP54</i>    | signal recognition particle 54(SRP54)                                |
|  |  | <i>SRPX2</i>    | sushi repeat containing protein, X-linked 2(SRPX2)                   |
|  |  | <i>STAT2</i>    | signal transducer and activator of transcription 2(STAT2)            |
|  |  | <i>STEAP2</i>   | STEAP2 metalloductase(STEAP2)                                        |
|  |  | <i>TAC3</i>     | tachykinin 3(TAC3)                                                   |
|  |  | <i>TBC1D15</i>  | TBC1 domain family member 15(TBC1D15)                                |
|  |  | <i>TCEAL8</i>   | transcription elongation factor A like 8(TCEAL8)                     |
|  |  | <i>TCF7L2</i>   | transcription factor 7 like 2(TCF7L2)                                |
|  |  | <i>TDG</i>      | thymine-DNA glycosylase(TDG)                                         |
|  |  | <i>TMEM263</i>  | transmembrane protein 263(TMEM263)                                   |
|  |  | <i>TMEM39A</i>  | transmembrane protein 39A(TMEM39A)                                   |
|  |  | <i>TMEM74</i>   | transmembrane protein 74(TMEM74)                                     |
|  |  | <i>TXNDC5</i>   | thioredoxin domain containing 5(TXNDC5)                              |
|  |  | <i>UACA</i>     | uveal autoantigen with coiled-coil domains and ankyrin repeats(UACA) |
|  |  | <i>UCAL-P19</i> | uterocalin P19(UCAL-P19)                                             |
|  |  | <i>USP15</i>    | ubiquitin specific peptidase 15(USP15)                               |

|  |  |               |                                                     |
|--|--|---------------|-----------------------------------------------------|
|  |  | <i>VCAN</i>   | versican(VCAN)                                      |
|  |  | <i>VNN1</i>   | vanin 1(VNN1)                                       |
|  |  | <i>VWA5A</i>  | von Willebrand factor A domain containing 5A(VWA5A) |
|  |  | <i>WBP5</i>   | WW domain binding protein 5                         |
|  |  | <i>WDR72</i>  | WD repeat domain 72                                 |
|  |  | <i>WNT2</i>   | Wnt family member 2(WNT2)                           |
|  |  | <i>XPB1</i>   | X-box binding protein 1(XBP1)                       |
|  |  | <i>ZBTB1</i>  | zinc finger and BTB domain containing 1(ZBTB1)      |
|  |  | <i>ZNF516</i> | zinc finger protein 516(ZNF516)                     |

**Supplementary Table 4.** List (akronym and description) of differentially expressed genes ( $P < 0.05$ ) solely related to copulation, in pig utero-tubal junction mucosa (UTJ) up- or down-regulated.

| <i>UP</i>         |                                                                                                        |  | <i>DOWN</i>         |                                                                                          |
|-------------------|--------------------------------------------------------------------------------------------------------|--|---------------------|------------------------------------------------------------------------------------------|
| <i>ADAP2</i>      | ArfGAP with dual PH domains 2(ADAP2)                                                                   |  | <i>ABHD2</i>        | abhydrolase domain containing 2(ABHD2)                                                   |
| <i>ALDH2</i>      | aldehyde dehydrogenase 2 family (mitochondrial)(ALDH2)                                                 |  | <i>ACKR3</i>        | atypical chemokine receptor 3(ACKR3)                                                     |
| <i>ANKZF1</i>     | ankyrin repeat and zinc finger domain containing 1(ANKZF1)                                             |  | <i>ALDH18A1</i>     | aldehyde dehydrogenase 18 family member A1(ALDH18A1)                                     |
| <i>ARHGAP20</i>   | Rho GTPase activating protein 20(ARHGAP20)                                                             |  | <i>ATP8B2</i>       | ATPase phospholipid transporting 8B2(ATP8B2)                                             |
| <i>ARRB1</i>      | arrestin beta 1(ARRB1)                                                                                 |  | <i>B4GALT1</i>      | beta-1,4-galactosyltransferase 1(B4GALT1)                                                |
| <i>BMPER</i>      | BMP binding endothelial regulator(BMPER)                                                               |  | <i>C13H3orf14</i>   | chromosome 13 open reading frame, human C3orf14(C13H3orf14)                              |
| <i>C18H7orf49</i> | chromosome 18 open reading frame, human C7orf49(C18H7orf49)                                            |  | <i>C6H1orf123</i>   | chromosome 6 open reading frame, human C1orf123(C6H1orf123)                              |
| <i>C1H9orf171</i> | chromosome 1 open reading frame, human C9orf171                                                        |  | <i>CALM2</i>        | calmodulin 2(CALM2)                                                                      |
| <i>C1QC</i>       | complement C1q C chain(C1QC)                                                                           |  | <i>CCNO</i>         | cyclin O(CCNO)                                                                           |
| <i>C4H1orf110</i> | chromosome 4 open reading frame, human C1orf110                                                        |  | <i>CD248</i>        | CD248 molecule(CD248)                                                                    |
| <i>CA9</i>        | carbonic anhydrase 9(CA9)                                                                              |  | <i>CD276</i>        | CD276 molecule(CD276)                                                                    |
| <i>CACNA1D</i>    | calcium voltage-gated channel subunit alpha1 D(CACNA1D)                                                |  | <i>CD63</i>         | CD63 molecule(CD63)                                                                      |
| <i>CAMK1D</i>     | calcium/calmodulin dependent protein kinase ID(CAMK1D)                                                 |  | <i>COL1A2</i>       | collagen type I alpha 2 chain(COL1A2)                                                    |
| <i>CCDC37</i>     | coiled-coil domain containing 37; coiled-coil domain-containing protein 37-like (CCDC37; LOC100624365) |  | <i>COPG1</i>        | coatomer protein complex, subunit gamma 1                                                |
| <i>CCDC81</i>     | coiled-coil domain containing 81(CCDC81)                                                               |  | <i>CPQ</i>          | carboxypeptidase Q; carboxypeptidase Q-like (CPQ; LOC106508327; LOC102163803)            |
| <i>CD27</i>       | CD27 molecule(CD27)                                                                                    |  | <i>CPXM1</i>        | carboxypeptidase X, M14 family member 1(CPXM1)                                           |
| <i>CDC14A</i>     | cell division cycle 14A(CDC14A)                                                                        |  | <i>CREB3L2</i>      | cAMP responsive element binding protein 3 like 2(CREB3L2)                                |
| <i>CHDH</i>       | choline dehydrogenase(CHDH)                                                                            |  | <i>CYP51</i>        | cytochrome P450, family 51, subfamily A, polypeptide 1(CYP51)                            |
| <i>CHKA</i>       | choline kinase alpha(CHKA)                                                                             |  | <i>DPF2</i>         | double PHD fingers 2(DPF2)                                                               |
| <i>CHN2</i>       | chimerin 2(CHN2)                                                                                       |  | <i>EEF1G</i>        | eukaryotic translation elongation factor 1 gamma(EEF1G)                                  |
| <i>COLCA2</i>     | colorectal cancer associated 2(COLCA2)                                                                 |  | <i>FAM114A1</i>     | family with sequence similarity 114 member A1(FAM114A1)                                  |
| <i>CTDSPL</i>     | CTD small phosphatase like(CTDSPL)                                                                     |  | <i>FAM167B</i>      | family with sequence similarity 167 member B(FAM167B)                                    |
| <i>CXHorf21</i>   | chromosome X open reading frame, human CXorf21(CXHorf21)                                               |  | <i>FAM19A4</i>      | family with sequence similarity 19 member A4, C-C motif chemokine like(FAM19A4)          |
| <i>DLEC1</i>      | deleted in lung and esophageal cancer 1(DLEC1)                                                         |  | <i>FAM98A</i>       | family with sequence similarity 98 member A(FAM98A)                                      |
| <i>DYRK1A</i>     | dual specificity tyrosine phosphorylation regulated kinase 1A(DYRK1A)                                  |  | <i>FBN1</i>         | fibrillin 1(FBN1)                                                                        |
| <i>ECT2L</i>      | epithelial cell transforming 2 like(ECT2L)                                                             |  | <i>FBXL5</i>        | F-box and leucine rich repeat protein 5(FBXL5)                                           |
| <i>EFCAB6</i>     | EF-hand calcium binding domain 6(EFCAB6)                                                               |  | <i>FKBP10</i>       | FK506 binding protein 10, 65 kDa                                                         |
| <i>ELMO1</i>      | engulfment and cell motility 1(ELMO1)                                                                  |  | <i>GAPDH</i>        | glyceraldehyde-3-phosphate dehydrogenase(GAPDH)                                          |
| <i>EP300</i>      | E1A binding protein p300(EP300)                                                                        |  | <i>GDI2</i>         | GDP dissociation inhibitor 2(GDI2)                                                       |
| <i>EPB41L1</i>    | erythrocyte membrane protein band 4.1 like 1(EPB41L1)                                                  |  | <i>GNG2</i>         | G protein subunit gamma 2(GNG2)                                                          |
| <i>EPS15</i>      | epidermal growth factor receptor pathway substrate 15(EPS15)                                           |  | <i>HMGCS1</i>       | 3-hydroxy-3-methylglutaryl-CoA synthase 1(HMGCS1)                                        |
| <i>FHAD1</i>      | forkhead-associated (FHA) phosphopeptide binding domain 1                                              |  | <i>HSPA13</i>       | heat shock protein family A (Hsp70) member 13(HSPA13)                                    |
| <i>GAS2L2</i>     | growth arrest specific 2 like 2(GAS2L2)                                                                |  | <i>HTRA4</i>        | HtrA serine peptidase 4(HTRA4)                                                           |
| <i>HAVCR2</i>     | hepatitis A virus cellular receptor 2(HAVCR2)                                                          |  | <i>KDELR3</i>       | KDEL endoplasmic reticulum protein retention receptor 3(KDELR3)                          |
| <i>HIPK3</i>      | homeodomain interacting protein kinase 3(HIPK3)                                                        |  | <i>LOC100513729</i> | hippocampus abundant transcript 1 protein                                                |
| <i>HPGD</i>       | hydroxyprostaglandin dehydrogenase 15-(NAD)(HPGD)                                                      |  | <i>LOC100523107</i> | melanoma-associated antigen D4(LOC100523107)                                             |
| <i>IRF2</i>       | interferon regulatory factor 2(IRF2)                                                                   |  | <i>LOC100524585</i> | ephrin type-B receptor 1(LOC100524585)                                                   |
| <i>JADE1</i>      | jade family PHD finger 1(JADE1)                                                                        |  | <i>LOC100623063</i> | protein FAM69A-like; family with sequence similarity 69, member A (LOC100623063; FAM69A) |
| <i>JAK2</i>       | Janus kinase 2(JAK2)                                                                                   |  | <i>LOC100737260</i> | astrotactin-1-like                                                                       |
| <i>KCNRG</i>      | potassium channel regulator(KCNRG)                                                                     |  | <i>LOC100738034</i> | citrate synthase, mitochondrial-like; citrate synthase (LOC100738034; CS)                |
| <i>KIAA1147</i>   | KIAA1147 ortholog(KIAA1147)                                                                            |  | <i>LOC100738213</i> | collagen alpha-1(I) chain                                                                |
| <i>KIAA1551</i>   | KIAA1551 ortholog(KIAA1551)                                                                            |  | <i>LOC100739719</i> | tetrasparin-6(LOC100739719)                                                              |

|                     |                                                                                                                                    |                     |                                                                                                         |
|---------------------|------------------------------------------------------------------------------------------------------------------------------------|---------------------|---------------------------------------------------------------------------------------------------------|
| <i>KIAA2018</i>     | KIAA2018 ortholog                                                                                                                  | <i>LOC102161647</i> | trichohyalin                                                                                            |
| <i>LOC100154396</i> | sister chromatid cohesion protein PDS5 homolog B( <i>LOC100154396</i> )                                                            | <i>LOC397571</i>    | collagen alpha-1(I) chain                                                                               |
| <i>LOC100157427</i> | nesprin-1-like                                                                                                                     | <i>MAGED1</i>       | MAGE family member D1( <i>MAGED1</i> )                                                                  |
| <i>LOC100514181</i> | coiled-coil domain-containing protein 40                                                                                           | <i>MIR218B</i>      | microRNA mir-218b                                                                                       |
| <i>LOC100514701</i> | MAP kinase-activating death domain protein                                                                                         | <i>MMP19</i>        | matrix metalloproteinase 19( <i>MMP19</i> )                                                             |
| <i>LOC100518397</i> | dynein heavy chain 9, axonemal                                                                                                     | <i>NPR2</i>         | natriuretic peptide receptor B/guanylate cyclase B (atrionatriuretic peptide receptor B)( <i>NPR2</i> ) |
| <i>LOC100519735</i> | dynein heavy chain 9, axonemal-like                                                                                                | <i>OSTC</i>         | oligosaccharyltransferase complex non-catalytic subunit( <i>OSTC</i> )                                  |
| <i>LOC100525061</i> | B-cell scaffold protein with ankyrin repeats( <i>LOC100525061</i> )                                                                | <i>PGK1</i>         | phosphoglycerate kinase 1( <i>PGK1</i> )                                                                |
| <i>LOC100624977</i> | uncharacterized protein C9orf117-like; chromosome 1 open reading frame, human C9orf117 ( <i>LOC100624977</i> ; <i>C1H9orf117</i> ) | <i>PLAUR</i>        | plasminogen activator, urokinase receptor( <i>PLAUR</i> )                                               |
| <i>LOC100627422</i> | ligand-dependent corepressor( <i>LOC100627422</i> )                                                                                | <i>PPM1J</i>        | protein phosphatase, Mg2+/Mn2+ dependent, 1J                                                            |
| <i>LOC102164742</i> | uncharacterized <i>LOC102164742</i>                                                                                                | <i>PRSS23</i>       | protease, serine 23( <i>PRSS23</i> )                                                                    |
| <i>LOC106504646</i> | intraflagellar transport protein 88 homolog; uncharacterized <i>LOC106504652</i> ( <i>LOC106504646</i> ; <i>LOC106504652</i> )     | <i>PTGFRN</i>       | prostaglandin F2 receptor inhibitor( <i>PTGFRN</i> )                                                    |
| <i>MAFB</i>         | MAF bZIP transcription factor B( <i>MAFB</i> )                                                                                     | <i>RABAC1</i>       | Rab acceptor 1( <i>RABAC1</i> )                                                                         |
| <i>MAPK10</i>       | mitogen-activated protein kinase 10( <i>MAPK10</i> )                                                                               | <i>REXO2</i>        | RNA exonuclease 2( <i>REXO2</i> )                                                                       |
| <i>MGA</i>          | MAX gene associated                                                                                                                | <i>RHOC</i>         | ras homolog family member C( <i>RHOC</i> )                                                              |
| <i>MIR425</i>       | microRNA mir-425                                                                                                                   | <i>SEC23A</i>       | Sec23 homolog A, coat complex II component( <i>SEC23A</i> )                                             |
| <i>MTR</i>          | 5-methyltetrahydrofolate-homocysteine methyltransferase( <i>MTR</i> )                                                              | <i>SEC61G</i>       | Sec61 translocon gamma subunit( <i>SEC61G</i> )                                                         |
| <i>MYLIP</i>        | myosin regulatory light chain interacting protein( <i>MYLIP</i> )                                                                  | <i>SEPN1</i>        | selenoprotein N, 1                                                                                      |
| <i>PNRC1</i>        | proline-rich nuclear receptor coactivator 1                                                                                        | <i>SHAS2</i>        | hyaluronan synthase 2( <i>SHAS2</i> )                                                                   |
| <i>RAB11FIP1</i>    | RAB11 family interacting protein 1( <i>RAB11FIP1</i> )                                                                             | <i>SLC9B1</i>       | solute carrier family 9 member B1( <i>SLC9B1</i> )                                                      |
| <i>RDH10</i>        | retinol dehydrogenase 10 (all-trans)( <i>RDH10</i> )                                                                               | <i>SQLE</i>         | squalene epoxidase( <i>SQLE</i> )                                                                       |
| <i>RENBP</i>        | renin binding protein( <i>RENBP</i> )                                                                                              | <i>SRPX2</i>        | sushi repeat containing protein, X-linked 2( <i>SRPX2</i> )                                             |
| <i>RNF128</i>       | ring finger protein 128, E3 ubiquitin protein ligase( <i>RNF128</i> )                                                              | <i>TMEM183A</i>     | transmembrane protein 183A( <i>TMEM183A</i> )                                                           |
| <i>SLC2A12</i>      | solute carrier family 2 member 12( <i>SLC2A12</i> )                                                                                | <i>TMEM45A</i>      | transmembrane protein 45A( <i>TMEM45A</i> )                                                             |
| <i>STMND1</i>       | stathmin domain containing 1( <i>STMND1</i> )                                                                                      | <i>TP23</i>         | basic proline-rich protein( <i>TP23</i> )                                                               |
| <i>TCTE1</i>        | t-complex-associated-testis-expressed 1( <i>TCTE1</i> )                                                                            | <i>VCAN</i>         | versican( <i>VCAN</i> )                                                                                 |
| <i>TEKT2</i>        | tektin 2( <i>TEKT2</i> )                                                                                                           | <i>WBP5</i>         | WW domain binding protein 5                                                                             |
| <i>TSHZ2</i>        | teashirt zinc finger homeobox 2( <i>TSHZ2</i> )                                                                                    |                     |                                                                                                         |
| <i>TSNAXIP1</i>     | translin associated factor X interacting protein 1( <i>TSNAXIP1</i> )                                                              |                     |                                                                                                         |
| <i>TTC39C</i>       | tetratricopeptide repeat domain 39C( <i>TTC39C</i> )                                                                               |                     |                                                                                                         |
| <i>TTL10</i>        | tubulin tyrosine ligase-like family member 10                                                                                      |                     |                                                                                                         |
| <i>TTL6</i>         | tubulin tyrosine ligase like 6( <i>TTL6</i> )                                                                                      |                     |                                                                                                         |
| <i>UAP1</i>         | UDP-N-acetylglucosamine pyrophosphorylase 1( <i>UAP1</i> )                                                                         |                     |                                                                                                         |
| <i>ZNF12</i>        | zinc finger protein 12                                                                                                             |                     |                                                                                                         |
| <i>ZNF202</i>       | zinc finger protein 202                                                                                                            |                     |                                                                                                         |
| <i>ZNF217</i>       | zinc finger protein 217( <i>ZNF217</i> )                                                                                           |                     |                                                                                                         |
| <i>ZXDB</i>         | zinc finger, X-linked, duplicated B( <i>ZXDB</i> )                                                                                 |                     |                                                                                                         |

**Table 5.** List of biological KEGG-pathways (DAVID database,  $P < 0.05$ ) of differentially-expressed genes (DEGs, ID and name) solely related to copulation, in pig uterine mucosae (endocervix (Cvx), endometrium (distal: D-Endom or proximal: P-Endom) and utero-tubal junction (UTJ)), up- or down-regulated.

| Tissue | Regulation | ID                  | Gene Name                                                              | KEGG_PATHWAY                                                                                                                                                                                                                                                                                                                                                                              |
|--------|------------|---------------------|------------------------------------------------------------------------|-------------------------------------------------------------------------------------------------------------------------------------------------------------------------------------------------------------------------------------------------------------------------------------------------------------------------------------------------------------------------------------------|
| Cvx    | UP         | <i>LOC100153094</i> | glutathione S-transferase theta-1( <i>LOC100153094</i> )               | ssc00480:Glutathione metabolism,ssc00980:Metabolism of xenobiotics by cytochrome P450,ssc00982:Drug metabolism - cytochrome P450,ssc05204:Chemical carcinogenesis,                                                                                                                                                                                                                        |
| Cvx    | UP         | <i>RETSAT</i>       | retinol saturase( <i>RETSAT</i> )                                      | ssc00830:Retinol metabolism,                                                                                                                                                                                                                                                                                                                                                              |
| Cvx    | UP         | <i>FMO1</i>         | flavin containing monooxygenase 1( <i>FMO1</i> )                       | ssc00982:Drug metabolism - cytochrome P450,                                                                                                                                                                                                                                                                                                                                               |
| Cvx    | UP         | <i>LOC100521052</i> | mitochondrial inner membrane protease subunit 2( <i>LOC100521052</i> ) | ssc03060:Protein export,\                                                                                                                                                                                                                                                                                                                                                                 |
| Cvx    | UP         | <i>IGF1R</i>        | insulin like growth factor 1 receptor( <i>IGF1R</i> )                  | ssc04014:Ras signaling pathway,ssc04015:Rap1 signaling pathway,ssc04066:HIF-1 signaling pathway,ssc04068:FoxO signaling pathway,ssc04114:Oocyte meiosis,ssc04144:Endocytosis,ssc04151:PI3K-Akt signaling pathway,ssc04152:AMPK signaling pathway,ssc04510:Focal adhesion,ssc04520:Adherens junction,ssc04550:Signaling pathways regulating pluriipotency of stem cells,ssc04730:Long-term |

|     |      |              |                                                                                                |                                                                                                                                                                                                                                                                                                                                                                                                      |
|-----|------|--------------|------------------------------------------------------------------------------------------------|------------------------------------------------------------------------------------------------------------------------------------------------------------------------------------------------------------------------------------------------------------------------------------------------------------------------------------------------------------------------------------------------------|
|     |      |              |                                                                                                | depression,ssc04913:Ovarian steroidogenesis,ssc04914:Progesterone-mediated oocyte maturation,ssc05200:Pathways in cancer,ssc05202:Transcriptional misregulation in cancer,ssc05205:Proteoglycans in cancer,ssc05214:Glioma,ssc05215:Prostate cancer,ssc05218:Melanoma,                                                                                                                               |
| Cvx | UP   | PRKCK        | protein kinase C theta(PRKCK)                                                                  | ssc04064:NF-kappa B signaling pathway,ssc04270:Vascular smooth muscle contraction,ssc04660:T cell receptor signaling pathway,ssc04750:Inflammatory mediator regulation of TRP channels,ssc04920:Adipocytokine signaling pathway,ssc04931:Insulin resistance,ssc05162:Measles,                                                                                                                        |
| Cvx | UP   | SESN3        | sestrin 3(SESN3)                                                                               | ssc04115:p53 signaling pathway,                                                                                                                                                                                                                                                                                                                                                                      |
| Cvx | UP   | VAMP2        | vesicle associated membrane protein 2(VAMP2)                                                   | ssc04130:SNARE interactions in vesicular transport,ssc04721:Synaptic vesicle cycle,ssc04911:Insulin secretion,ssc04962:Vasopressin-regulated water reabsorption,ssc04970:Salivary secretion,                                                                                                                                                                                                         |
| Cvx | UP   | GGA2         | golgi associated, gamma adaptin ear containing, ARF binding protein 2(GGA2)                    | ssc04142:Lysosome,                                                                                                                                                                                                                                                                                                                                                                                   |
| Cvx | UP   | THBS3        | thrombospondin 3(THBS3)                                                                        | ssc04145:Phagosome,ssc04151:PI3K-Akt signaling pathway,ssc04510:Focal adhesion,ssc04512:ECM-receptor interaction,ssc05144:Malaria,                                                                                                                                                                                                                                                                   |
| Cvx | UP   | DECR2        | 2,4-dienoyl-CoA reductase 2, peroxisomal(DECR2)                                                | ssc04146:Peroxisome,                                                                                                                                                                                                                                                                                                                                                                                 |
| Cvx | UP   | LOC100738970 | CXXC-type zinc finger protein 4(LOC100738970)                                                  | ssc04310:Wnt signaling pathway,\                                                                                                                                                                                                                                                                                                                                                                     |
| Cvx | UP   | NCOR2        | nuclear receptor corepressor 2(NCOR2)                                                          | ssc04330:Notch signaling pathway,ssc05169:Epstein-Barr virus infection,                                                                                                                                                                                                                                                                                                                              |
| Cvx | UP   | NTN4         | netrin 4(NTN4)                                                                                 | ssc04360:Axon guidance,                                                                                                                                                                                                                                                                                                                                                                              |
| Cvx | UP   | RFXAP        | regulatory factor X associated protein(RFXAP)                                                  | ssc04612:Antigen processing and presentation,ssc05152:Tuberculosis,ssc05340:Primary immunodeficiency,                                                                                                                                                                                                                                                                                                |
| Cvx | UP   | AGT          | angiotensinogen(AGT)                                                                           | ssc04614:Renin-angiotensin system,ssc04924:Renin secretion,\                                                                                                                                                                                                                                                                                                                                         |
| Cvx | UP   | KCNQ4        | potassium voltage-gated channel subfamily Q member 4(KCNQ4)                                    | ssc04725:Cholinergic synapse,                                                                                                                                                                                                                                                                                                                                                                        |
| Cvx | UP   | SLC9A3R2     | SLC9A3 regulator 2(SLC9A3R2)                                                                   | ssc04960:Aldosterone-regulated sodium reabsorption,                                                                                                                                                                                                                                                                                                                                                  |
| Cvx | UP   | HDAC9        | histone deacetylase 9(HDAC9)                                                                   | ssc05034:Alcoholism,ssc05203:Viral carcinogenesis,                                                                                                                                                                                                                                                                                                                                                   |
| Cvx | UP   | CRTC1        | CREB regulated transcription coactivator 1(CRTC1)                                              | ssc05166:HTLV-I infection,\                                                                                                                                                                                                                                                                                                                                                                          |
| Cvx | UP   | MIR181B-1    | microRNA 181b-1(MIR181B-1)                                                                     | ssc05206:MicroRNAs in cancer,\                                                                                                                                                                                                                                                                                                                                                                       |
| Cvx | DOWN | PGD          | phosphogluconate dehydrogenase(PGD)                                                            | ssc00030:Ribose phosphate pathway,ssc00480:Glutathione metabolism,ssc01100:Metabolic pathways,ssc01130:Biosynthesis of antibiotics,ssc01200:Carbon metabolism,                                                                                                                                                                                                                                       |
| Cvx | DOWN | LOC100511841 | UDP-glucuronosyltransferase 1-10(LOC100511841)                                                 | ssc00040:Ribose phosphate pathway,ssc00053:Ascorbate and aldarate metabolism,ssc00140:Steroid hormone biosynthesis,ssc00830:Retinol metabolism,ssc00860:Porphyrin and chlorophyll metabolism,ssc00980:Metabolism of xenobiotics by cytochrome P450,ssc00982:Drug metabolism - cytochrome P450,ssc00983:Drug metabolism - other enzymes,ssc01100:Metabolic pathways,ssc05204:Chemical carcinogenesis, |
| Cvx | DOWN | B4GALT1      | beta-1,4-galactosyltransferase 1(B4GALT1)                                                      | ssc00052:Galactose metabolism,ssc00510:N-Glycan biosynthesis,ssc00514:Other types of O-glycan biosynthesis,ssc00533:Glycosaminoglycan biosynthesis - keratan sulfate,ssc00601:Glycosphingolipid biosynthesis - lacto and neolacto series,ssc01100:Metabolic pathways,                                                                                                                                |
| Cvx | DOWN | HMGCS1       | 3-hydroxy-3-methylglutaryl-CoA synthase 1(HMGCS1)                                              | ssc00072:Synthesis and degradation of ketone bodies,ssc00280:Valine, leucine and isoleucine degradation,ssc00650:Butanoate metabolism,ssc00900:Terpenoid backbone biosynthesis,ssc01100:Metabolic pathways,ssc01130:Biosynthesis of antibiotics,                                                                                                                                                     |
| Cvx | DOWN | CYP51        | cytochrome P450, family 51, subfamily A, polypeptide 1(CYP51)                                  | ssc00100:Steroid biosynthesis,ssc01100:Metabolic pathways,ssc01130:Biosynthesis of antibiotics,                                                                                                                                                                                                                                                                                                      |
| Cvx | DOWN | SOLE         | squalene epoxidase(SOLE)                                                                       | ssc00100:Steroid biosynthesis,ssc01100:Metabolic pathways,ssc01130:Biosynthesis of antibiotics,                                                                                                                                                                                                                                                                                                      |
| Cvx | DOWN | ATP6V0C      | ATPase H+ transporting V0 subunit c(ATP6V0C)                                                   | ssc00190:Oxidative phosphorylation,ssc01100:Metabolic pathways,ssc04142:Lysosome,ssc04145:Phagosome,ssc04721:Synaptic vesicle cycle,ssc04966:Collecting duct acid secretion,ssc05152:Tuberculosis,ssc05323:Rheumatoid arthritis,                                                                                                                                                                     |
| Cvx | DOWN | NT5C2        | 5'-nucleotidase, cytosolic II(NT5C2)                                                           | ssc00230:Purine metabolism,ssc00240:Pyrimidine metabolism,ssc00760:Nicotinate and nicotinamide metabolism,ssc01100:Metabolic pathways,                                                                                                                                                                                                                                                               |
| Cvx | DOWN | PAPSS2       | 3'-phosphoadenosine 5'-phosphosulfate synthase 2(PAPSS2)                                       | ssc00230:Purine metabolism,ssc00450:Selenocompound metabolism,ssc00920:Sulfur metabolism,ssc01100:Metabolic pathways,ssc01130:Biosynthesis of antibiotics,                                                                                                                                                                                                                                           |
| Cvx | DOWN | NPR2         | natriuretic peptide receptor B/guanylate cyclase B (atrionatriuretic peptide receptor B)(NPR2) | ssc00230:Purine metabolism,ssc04022:cGMP-PKG signaling pathway,ssc04270:Vascular smooth muscle contraction,ssc04921:Oxytocin signaling pathway,                                                                                                                                                                                                                                                      |
| Cvx | DOWN | CMPK2        | cytidine/uridine monophosphate kinase 2(CMPK2)                                                 | ssc00240:Pyrimidine metabolism,ssc01100:Metabolic pathways,                                                                                                                                                                                                                                                                                                                                          |
| Cvx | DOWN | PLOD2        | procollagen-lysine,2-oxoglutarate 5-dioxygenase 2(PLOD2)                                       | ssc00310:Lysine degradation,                                                                                                                                                                                                                                                                                                                                                                         |
| Cvx | DOWN | SEPHS2       | selenophosphate synthetase 2(SEPHS2)                                                           | ssc00450:Selenocompound metabolism,ssc01100:Metabolic pathways,                                                                                                                                                                                                                                                                                                                                      |
| Cvx | DOWN | MAN2A1       | mannosidase alpha class 2A member 1(MAN2A1)                                                    | ssc00510:N-Glycan biosynthesis,ssc01100:Metabolic pathways,                                                                                                                                                                                                                                                                                                                                          |
| Cvx | DOWN | GCNT3        | glucosaminyl (N-acetyl) transferase 3, mucin type(GCNT3)                                       | ssc00512:Mucin type O-Glycan biosynthesis,ssc01100:Metabolic pathways,                                                                                                                                                                                                                                                                                                                               |
| Cvx | DOWN | AGPAT2       | 1-acylglycerol-3-phosphate O-acyltransferase 2(AGPAT2)                                         | ssc00561:Glycerolipid metabolism,ssc00564:Glycerophospholipid metabolism,ssc01100:Metabolic pathways,ssc04975:Fat digestion and absorption,                                                                                                                                                                                                                                                          |
| Cvx | DOWN | SGPP2        | sphingosine-1-phosphate phosphatase 2(SGPP2)                                                   | ssc00600:Sphingolipid metabolism,ssc04071:Sphingolipid signaling pathway,                                                                                                                                                                                                                                                                                                                            |
| Cvx | DOWN | B3GALT2      | beta-1,3-galactosyltransferase 2(B3GALT2)                                                      | ssc00601:Glycosphingolipid biosynthesis - lacto and neolacto series,ssc01100:Metabolic pathways,                                                                                                                                                                                                                                                                                                     |
| Cvx | DOWN | PANK3        | pantothenate kinase 3(PANK3)                                                                   | ssc00770:Pantothenate and CoA biosynthesis,ssc01100:Metabolic pathways,                                                                                                                                                                                                                                                                                                                              |
| Cvx | DOWN | HMGCR        | 3-hydroxy-3-methylglutaryl-CoA reductase(HMGCR)                                                | ssc00900:Terpenoid backbone biosynthesis,ssc01100:Metabolic pathways,ssc01130:Biosynthesis of antibiotics,ssc04152:AMPK signaling pathway,ssc04976:BILE secretion,                                                                                                                                                                                                                                   |
| Cvx | DOWN | FDPS         | farnesyl diphosphate synthase(FDPS)                                                            | ssc00900:Terpenoid backbone biosynthesis,ssc01100:Metabolic pathways,ssc01130:Biosynthesis of antibiotics,ssc05164:Influenza A,ssc05166:HTLV-I infection,                                                                                                                                                                                                                                            |
| Cvx | DOWN | GARS         | glycyl-tRNA synthetase(GARS)                                                                   | ssc00970:Aminoacyl-tRNA biosynthesis,                                                                                                                                                                                                                                                                                                                                                                |
| Cvx | DOWN | KSR1         | kinase suppressor of ras 1(KSR1)                                                               | ssc04014:Ras signaling pathway,ssc05152:Tuberculosis,                                                                                                                                                                                                                                                                                                                                                |
| Cvx | DOWN | THBS1        | thrombospondin 1(THBS1)                                                                        | ssc04015:Rap1 signaling pathway,ssc04115:p53 signaling pathway,ssc04145:Phagosome,ssc04151:PI3K-Akt signaling pathway,ssc04350:TGF-beta signaling pathway,ssc04510:Focal adhesion,ssc04512:ECM-receptor interaction,ssc05144:Malaria,ssc05205:Proteoglycans in cancer,ssc05206:MicroRNAs in cancer,ssc05219:Bladder cancer,                                                                          |
| Cvx | DOWN | CXCL10       | C-X-C motif chemokine ligand 10(CXCL10)                                                        | ssc04060:Cytokine-cytokine receptor interaction,ssc04062:Chemokine signaling pathway,ssc04620:Toll-like receptor signaling pathway,ssc04622:RIG-I-like receptor signaling pathway,ssc04623:Cytosolic DNA-sensing pathway,ssc04668:TNF signaling pathway,ssc05164:Influenza A,                                                                                                                        |
| Cvx | DOWN | IL6ST        | interleukin 6 signal transducer(IL6ST)                                                         | ssc04060:Cytokine-cytokine receptor interaction,ssc04550:Signaling pathways regulating pluripotency of stem cells,ssc04630:Jak-STAT signaling pathway,ssc05203:Viral carcinogenesis,                                                                                                                                                                                                                 |
| Cvx | DOWN | S1PR3        | sphingosine-1-phosphate receptor 3(S1PR3)                                                      | ssc04071:Sphingolipid signaling pathway,ssc04080:Neuroactive ligand-receptor interaction,                                                                                                                                                                                                                                                                                                            |
| Cvx | DOWN | NPY2R        | neuropeptide Y receptor Y2(NPY2R)                                                              | ssc04080:Neuroactive ligand-receptor interaction,                                                                                                                                                                                                                                                                                                                                                    |
| Cvx | DOWN | REC8         | REC8 meiotic recombination protein(REC8)                                                       | ssc04114:Oocyte meiosis,\                                                                                                                                                                                                                                                                                                                                                                            |



|        |      |              |                                                                                         |                                                                                                                                                                                                                                                                                                                                                                                                                                                                         |
|--------|------|--------------|-----------------------------------------------------------------------------------------|-------------------------------------------------------------------------------------------------------------------------------------------------------------------------------------------------------------------------------------------------------------------------------------------------------------------------------------------------------------------------------------------------------------------------------------------------------------------------|
| Cvx    | DOWN | UBA7         | ubiquitin like modifier activating enzyme 7(UBA7)                                       | ssc04120:Ubiquitin mediated proteolysis,ssc05012:Parkinson's disease,                                                                                                                                                                                                                                                                                                                                                                                                   |
| Cvx    | DOWN | NPC1         | NPC intracellular cholesterol transporter 1(NPC1)                                       | ssc04142:Lysosome,                                                                                                                                                                                                                                                                                                                                                                                                                                                      |
| Cvx    | DOWN | SLA-7        | MHC class I antigen 7(SLA-7)                                                            | ssc04144:Endocytosis,ssc04145:Phagosome,ssc04514:Cell adhesion molecules (CAMs),ssc04612:Antigen processing and presentation,ssc04940:Type I diabetes mellitus,ssc05166:HTLV-1 infection,ssc05168:Herpes simplex infection,ssc05169:Epstein-Barr virus infection,ssc05203:Viral carcinogenesis,ssc05320:Autoimmune thyroid disease,ssc05330:Allograft rejection,ssc05332:Graft-versus-host disease,ssc05416:Viral myocarditis,                                          |
| Cvx    | DOWN | SLC25A17     | solute carrier family 25 member 17(SLC25A17)                                            | ssc04146:Peroxisome,                                                                                                                                                                                                                                                                                                                                                                                                                                                    |
| Cvx    | DOWN | LOC100517053 | integrin alpha-3(LOC100517053)                                                          | ssc04151:PI3K-Akt signaling pathway,ssc04510:Focal adhesion,ssc04512:ECM-receptor interaction,ssc04640:Hematopoietic cell lineage,ssc04810:Regulation of actin cytoskeleton,ssc05200:Pathways in cancer,ssc05222:Small cell lung cancer,ssc05410:Hypertrophic cardiomyopathy (HCM),ssc05412:Arrhythmogenic right ventricular cardiomyopathy (ARVC),ssc05414:Dilated cardiomyopathy,                                                                                     |
| Cvx    | DOWN | CD47         | CD47 molecule(CD47)                                                                     | ssc04512:ECM-receptor interaction,                                                                                                                                                                                                                                                                                                                                                                                                                                      |
| Cvx    | DOWN | LOC100525346 | poliovirus receptor homolog(LOC100525346)                                               | ssc04514:Cell adhesion molecules (CAMs),                                                                                                                                                                                                                                                                                                                                                                                                                                |
| Cvx    | DOWN | VCAN         | versican(VCAN)                                                                          | ssc04514:Cell adhesion molecules (CAMs),                                                                                                                                                                                                                                                                                                                                                                                                                                |
| Cvx    | DOWN | GJA1         | gap junction protein alpha 1(GJA1)                                                      | ssc04540:Gap junction,ssc05412:Arrhythmogenic right ventricular cardiomyopathy (ARVC),                                                                                                                                                                                                                                                                                                                                                                                  |
| Cvx    | DOWN | PLAT         | plasminogen activator, tissue type(PLAT)                                                | ssc04610:Complement and coagulation cascades,ssc05202:Transcriptional misregulation in cancer,                                                                                                                                                                                                                                                                                                                                                                          |
| Cvx    | DOWN | PLAUR        | plasminogen activator, urokinase receptor(PLAUR)                                        | ssc04610:Complement and coagulation cascades,ssc05205:Proteoglycans in cancer,                                                                                                                                                                                                                                                                                                                                                                                          |
| Cvx    | DOWN | TAPBP        | TAP binding protein(TAPBP)                                                              | ssc04612:Antigen processing and presentation,                                                                                                                                                                                                                                                                                                                                                                                                                           |
| Cvx    | DOWN | ENPEP        | glutamyl aminopeptidase(ENPEP)                                                          | ssc04614:Renin-angiotensin system,                                                                                                                                                                                                                                                                                                                                                                                                                                      |
| Cvx    | DOWN | ZBP1         | Z-DNA binding protein 1(ZBP1)                                                           | ssc04623:Cytosolic DNA-sensing pathway,                                                                                                                                                                                                                                                                                                                                                                                                                                 |
| Cvx    | DOWN | RIPK3        | receptor interacting serine/threonine kinase 3(RIPK3)                                   | ssc04623:Cytosolic DNA-sensing pathway,ssc04668:TNF signaling pathway,                                                                                                                                                                                                                                                                                                                                                                                                  |
| Cvx    | DOWN | MMP3         | matrix metalloproteinase 3 (stromelysin 1, progelatinase)(MMP3)                         | ssc04668:TNF signaling pathway,ssc05202:Transcriptional misregulation in cancer,ssc05323:Rheumatoid arthritis,                                                                                                                                                                                                                                                                                                                                                          |
| Cvx    | DOWN | RASD1        | ras related dexamethasone induced 1(RASD1)                                              | ssc04713:Circadian entrainment,                                                                                                                                                                                                                                                                                                                                                                                                                                         |
| Cvx    | DOWN | LOC100154959 | olfactory receptor 4K3(LOC100154959)                                                    | ssc04740:Olfactory transduction,                                                                                                                                                                                                                                                                                                                                                                                                                                        |
| Cvx    | DOWN | MX1          | myxovirus (influenza virus) resistance 1, interferon-inducible protein p78 (mouse)(MX1) | ssc05162:Measles,ssc05164:Influenza A,                                                                                                                                                                                                                                                                                                                                                                                                                                  |
| Cvx    | DOWN | RSAD2        | radical S-adenosyl methionine domain containing 2(RSAD2)                                | ssc05164:Influenza A,                                                                                                                                                                                                                                                                                                                                                                                                                                                   |
| Cvx    | DOWN | NCOA4        | nuclear receptor coactivator 4(NCOA4)                                                   | ssc05200:Pathways in cancer,ssc05216:Thyroid cancer,                                                                                                                                                                                                                                                                                                                                                                                                                    |
| DistUt | UP   | ALDH2        | aldehyde dehydrogenase 2 family (mitochondrial)(ALDH2)                                  | ssc00010:Glycolysis / Gluconeogenesis,ssc00053:Ascorbate and aldarate metabolism,ssc00071:Fatty acid degradation,ssc00280:Valine, leucine and isoleucine degradation,ssc00310:Lysine degradation,ssc00330:Arginine and proline metabolism,ssc00340:Histidine metabolism,ssc00380:Tryptophan metabolism,ssc00410:beta-Alanine metabolism,ssc00561:Glycerolipid metabolism,ssc00620:Pyruvate metabolism,ssc01100:Metabolic pathways,ssc01130:Biosynthesis of antibiotics, |
| DistUt | UP   | IDH3G        | isocitrate dehydrogenase 3 (NAD(+)) gamma(IDH3G)                                        | ssc00020:Citrate cycle (TCA cycle),ssc01100:Metabolic pathways,ssc01130:Biosynthesis of antibiotics,ssc01200:Carbon metabolism,ssc01210:2-Oxocarboxylic acid metabolism,ssc01230:Biosynthesis of amino acids,                                                                                                                                                                                                                                                           |
| DistUt | UP   | HADH         | hydroxyacyl-CoA dehydrogenase(HADH)                                                     | ssc00062:Fatty acid elongation,ssc00071:Fatty acid degradation,ssc00280:Valine, leucine and isoleucine degradation,ssc00310:Lysine degradation,ssc00380:Tryptophan metabolism,ssc00650:Butanoate metabolism,ssc01100:Metabolic pathways,ssc01130:Biosynthesis of antibiotics,ssc01212:Fatty acid metabolism,                                                                                                                                                            |
| DistUt | UP   | NDUFV1       | NADH:ubiquinone oxidoreductase core subunit V1(NDUFV1)                                  | ssc00190:Oxidative phosphorylation,ssc01100:Metabolic pathways,ssc04932:Non-alcoholic fatty liver disease (NAFLD),ssc05010:Alzheimer's disease,ssc05012:Parkinson's disease,ssc05016:Huntington's disease,                                                                                                                                                                                                                                                              |
| DistUt | UP   | NDUFA10      | NADH:ubiquinone oxidoreductase subunit A10(NDUFA10)                                     | ssc00190:Oxidative phosphorylation,ssc01100:Metabolic pathways,ssc04932:Non-alcoholic fatty liver disease (NAFLD),ssc05010:Alzheimer's disease,ssc05012:Parkinson's disease,ssc05016:Huntington's disease,                                                                                                                                                                                                                                                              |
| DistUt | UP   | ATP5E        | ATP synthase, H+ transporting, mitochondrial F1 complex, epsilon subunit(ATP5E)         | ssc00190:Oxidative phosphorylation,ssc01100:Metabolic pathways,ssc05010:Alzheimer's disease,ssc05012:Parkinson's disease,ssc05016:Huntington's disease,                                                                                                                                                                                                                                                                                                                 |
| DistUt | UP   | GMPR         | guanosine monophosphate reductase(GMPR)                                                 | ssc00230:Purine metabolism,                                                                                                                                                                                                                                                                                                                                                                                                                                             |
| DistUt | UP   | POLR1A       | RNA polymerase I subunit A(POLR1A)                                                      | ssc00230:Purine metabolism,ssc00240:Pyrimidine metabolism,ssc01100:Metabolic pathways,ssc03020:RNA polymerase,                                                                                                                                                                                                                                                                                                                                                          |
| DistUt | UP   | POLR1D       | RNA polymerase I subunit D(POLR1D)                                                      | ssc00230:Purine metabolism,ssc00240:Pyrimidine metabolism,ssc01100:Metabolic pathways,ssc03020:RNA polymerase,ssc04623:Cytosolic DNA-sensing pathway,                                                                                                                                                                                                                                                                                                                   |
| DistUt | UP   | DGUOK        | deoxyguanosine kinase(DGUOK)                                                            | ssc00230:Purine metabolism,ssc01100:Metabolic pathways,                                                                                                                                                                                                                                                                                                                                                                                                                 |
| DistUt | UP   | GNMT         | glycine N-methyltransferase(GNMT)                                                       | ssc00260:Glycine, serine and threonine metabolism,                                                                                                                                                                                                                                                                                                                                                                                                                      |
| DistUt | UP   | ALDH6A1      | aldehyde dehydrogenase 6 family member A1(ALDH6A1)                                      | ssc00280:Valine, leucine and isoleucine degradation,ssc00410:beta-Alanine metabolism,ssc00562:Inositol phosphate metabolism,ssc00640:Propanoate metabolism,ssc01100:Metabolic pathways,ssc01200:Carbon metabolism,                                                                                                                                                                                                                                                      |
| DistUt | UP   | EHMT2        | euchromatic histone lysine methyltransferase 2(EHMT2)                                   | ssc00310:Lysine degradation,                                                                                                                                                                                                                                                                                                                                                                                                                                            |
| DistUt | UP   | FAH          | fumarylacetoacetate hydrolase(FAH)                                                      | ssc00350:Tyrosine metabolism,ssc01100:Metabolic pathways,                                                                                                                                                                                                                                                                                                                                                                                                               |
| DistUt | UP   | LOC100624445 | gamma-glutamylcyclotransferase-like(LOC100624445)                                       | ssc00480:Glutathione metabolism,                                                                                                                                                                                                                                                                                                                                                                                                                                        |
| DistUt | UP   | GSTK1        | glutathione S-transferase kappa 1(GSTK1)                                                | ssc00480:Glutathione metabolism,ssc00980:Metabolism of xenobiotics by cytochrome P450,ssc00982:Drug metabolism - cytochrome P450,ssc04146:Peroxisome,ssc05204:Chemical carcinogenesis,                                                                                                                                                                                                                                                                                  |
| DistUt | UP   | POFUT1       | protein O-fucosyltransferase 1(POFUT1)                                                  | ssc00514:Other types of O-glycan biosynthesis,                                                                                                                                                                                                                                                                                                                                                                                                                          |
| DistUt | UP   | DGAT1        | diacylglycerol O-acyltransferase 1(DGAT1)                                               | ssc00561:Glycerolipid metabolism,ssc00830:Retinol metabolism,ssc01100:Metabolic pathways,ssc04975:Fat digestion and absorption,                                                                                                                                                                                                                                                                                                                                         |
| DistUt | UP   | MTMR7        | myotubularin related protein 7(MTMR7)                                                   | ssc00562:Inositol phosphate metabolism,ssc01100:Metabolic pathways,ssc04070:Phosphatidylinositol signaling system,                                                                                                                                                                                                                                                                                                                                                      |
| DistUt | UP   | PLD2         | phospholipase D2(PLD2)                                                                  | ssc00564:Glycerophospholipid metabolism,ssc00565:Ether lipid metabolism,ssc01100:Metabolic pathways,ssc04014:Ras signaling pathway,ssc04024:cAMP signaling pathway,ssc04071:Sphingolipid signaling pathway,ssc04144:Endocytosis,ssc04666:Fc gamma R-mediated phagocytosis,ssc04724:Glutamatergic synapse,ssc04912:GnRH signaling pathway,ssc05231:Choline metabolism in cancer,                                                                                         |
| DistUt | UP   | CHKA         | choline kinase alpha(CHKA)                                                              | ssc00564:Glycerophospholipid metabolism,ssc01100:Metabolic pathways,ssc05231:Choline metabolism in cancer,                                                                                                                                                                                                                                                                                                                                                              |
| DistUt | UP   | LOC100513474 | platelet-activating factor acetylhydrolase IB subunit gamma(LOC100513474)               | ssc00565:Ether lipid metabolism,ssc01100:Metabolic pathways,                                                                                                                                                                                                                                                                                                                                                                                                            |

|        |      |              |                                                                                                 |                                                                                                                                                                                                                                                                                                                               |
|--------|------|--------------|-------------------------------------------------------------------------------------------------|-------------------------------------------------------------------------------------------------------------------------------------------------------------------------------------------------------------------------------------------------------------------------------------------------------------------------------|
| DistUt | UP   | SPR          | sepiapterin reductase (7,8-dihydrobiopterin:NADP+ oxidoreductase)(SPR)                          | ssc00790:Folate biosynthesis,ssc01100:Metabolic pathways,                                                                                                                                                                                                                                                                     |
| DistUt | UP   | DHRS3        | dehydrogenase/reductase 3(DHRS3)                                                                | ssc00830:Retinol metabolism,ssc01100:Metabolic pathways,                                                                                                                                                                                                                                                                      |
| DistUt | UP   | FMO2         | flavin containing monooxygenase 2(FMO2)                                                         | ssc00982:Drug metabolism - cytochrome P450,                                                                                                                                                                                                                                                                                   |
| DistUt | UP   | ABC A9       | ATP binding cassette subfamily A member 9(ABCA9)                                                | ssc02010:ABC transporters,                                                                                                                                                                                                                                                                                                    |
| DistUt | UP   | CYFIP2       | cytoplasmic FMR1 interacting protein 2(CYFIP2)                                                  | ssc03013:RNA transport,ssc04810:Regulation of actin cytoskeleton,                                                                                                                                                                                                                                                             |
| DistUt | UP   | CNOT1        | CCR4-NOT transcription complex subunit 1(CNOT1)                                                 | ssc03018:RNA degradation,                                                                                                                                                                                                                                                                                                     |
| DistUt | UP   | CNOT2        | CCR4-NOT transcription complex subunit 2(CNOT2)                                                 | ssc03018:RNA degradation,                                                                                                                                                                                                                                                                                                     |
| DistUt | UP   | LOC100521052 | mitochondrial inner membrane protease subunit 2(LOC100521052)                                   | ssc03060:Protein export,\                                                                                                                                                                                                                                                                                                     |
| DistUt | UP   | CUL4A        | cullin 4A(CUL4A)                                                                                | ssc03420:Nucleotide excision repair,ssc04120:Ubiquitin mediated proteolysis,                                                                                                                                                                                                                                                  |
| DistUt | UP   | MAP4K2       | mitogen-activated protein kinase kinase kinase 2(MAP4K2)                                        | ssc04010:MAPK signaling pathway,                                                                                                                                                                                                                                                                                              |
| DistUt | UP   | ARRB2        | arrestin beta 2(ARRB2)                                                                          | ssc04010:MAPK signaling pathway,ssc04062:Chemokine signaling pathway,ssc04144:Endocytosis,ssc05032:Morphine addiction,                                                                                                                                                                                                        |
| DistUt | UP   | CDC25B       | cell division cycle 25B(CDC25B)                                                                 | ssc04010:MAPK signaling pathway,ssc04110:Cell cycle,ssc04914:Progesterone-mediated oocyte maturation,ssc05206:MicroRNAs in cancer,                                                                                                                                                                                            |
| DistUt | UP   | CACNB2       | calcium voltage-gated channel auxiliary subunit beta 2(CACNB2)                                  | ssc04010:MAPK signaling pathway,ssc04260:Cardiac muscle contraction,ssc04261:Adrenergic signaling in cardiomyocytes,ssc04921:Oxytocin signaling pathway,ssc05410:Hypertrophic cardiomyopathy (HCM),ssc05412:Arrhythmic right ventricular cardiomyopathy (ARVC),ssc05414:Dilated cardiomyopathy,                               |
| DistUt | UP   | CSF1R        | colony stimulating factor 1 receptor(CSF1R)                                                     | ssc04014:Ras signaling pathway,ssc04015:Rap1 signaling pathway,ssc04060:Cytokine-cytokine receptor interaction,ssc04151:PI3K-Akt signaling pathway,ssc04380:Osteoclast differentiation,ssc04640:Hematopoietic cell lineage,ssc05200:Pathways in cancer,ssc05202:Transcriptional misregulation in cancer,                      |
| DistUt | UP   | PDGFD        | platelet derived growth factor D(PDGFD)                                                         | ssc04014:Ras signaling pathway,ssc04015:Rap1 signaling pathway,ssc04151:PI3K-Akt signaling pathway,ssc04510:Focal adhesion,ssc04540:Gap junction,ssc04810:Regulation of actin cytoskeleton,ssc05215:Prostate cancer,ssc05218:Melanoma,ssc05231:Choline metabolism in cancer,\                                                 |
| DistUt | UP   | VEGFB        | vascular endothelial growth factor B(VEGFB)                                                     | ssc04014:Ras signaling pathway,ssc04015:Rap1 signaling pathway,ssc04151:PI3K-Akt signaling pathway,ssc04510:Focal adhesion,ssc05200:Pathways in cancer,                                                                                                                                                                       |
| DistUt | UP   | ADRA2A       | adrenoreceptor alpha 2A(ADRA2A)                                                                 | ssc04022:cGMP-PKG signaling pathway,ssc04080:Neuroactive ligand-receptor interaction,                                                                                                                                                                                                                                         |
| DistUt | UP   | GABRB2       | gamma-aminobutyric acid type A receptor beta2 subunit(GABRB2)                                   | ssc04080:Neuroactive ligand-receptor interaction,ssc04723:Retrograde endocannabinoid signaling,ssc04726:Serotonergic synapse,ssc04727:GABAergic synapse,ssc05032:Morphine addiction,ssc05033:Nicotine addiction,                                                                                                              |
| DistUt | UP   | CDC25C       | cell division cycle 25C(CDC25C)                                                                 | ssc04110:Cell cycle,ssc04114:Oocyte meiosis,ssc04914:Progesterone-mediated oocyte maturation,ssc05206:MicroRNAs in cancer,                                                                                                                                                                                                    |
| DistUt | UP   | STX10        | syntaxin 10(STX10)                                                                              | ssc04130:SNARE interactions in vesicular transport,                                                                                                                                                                                                                                                                           |
| DistUt | UP   | UBQLN4       | ubiquilin 4(UBQLN4)                                                                             | ssc04141:Protein processing in endoplasmic reticulum,                                                                                                                                                                                                                                                                         |
| DistUt | UP   | HSP90AB1     | heat shock protein 90 alpha family class B member 1(HSP90AB1)                                   | ssc04141:Protein processing in endoplasmic reticulum,ssc04151:PI3K-Akt signaling pathway,ssc04612:Antigen processing and presentation,ssc04621:NOD-like receptor signaling pathway,ssc04914:Progesterone-mediated oocyte maturation,ssc04915:Estrogen signaling pathway,ssc05200:Pathways in cancer,ssc05215:Prostate cancer, |
| DistUt | UP   | RUFY1        | RUN and FYVE domain containing 1(RUFY1)                                                         | ssc04144:Endocytosis,                                                                                                                                                                                                                                                                                                         |
| DistUt | UP   | FCGR1A       | Fc fragment of IgG, high affinity Ia, receptor (CD64)(FCGR1A)                                   | ssc04145:Phagosome,ssc04380:Osteoclast differentiation,ssc04640:Hematopoietic cell lineage,ssc04666:Fc gamma R-mediated phagocytosis,ssc05140:Leishmaniasis,ssc05150:Staphylococcus aureus infection,ssc05152:Tuberculosis,ssc05202:Transcriptional misregulation in cancer,ssc05322:Systemic lupus erythematosus,            |
| DistUt | UP   | TBL1X        | transducin beta like 1X-linked(TBL1X)                                                           | ssc04310:Wnt signaling pathway,                                                                                                                                                                                                                                                                                               |
| DistUt | UP   | WNT7A        | Wnt family member 7A(WNT7A)                                                                     | ssc04310:Wnt signaling pathway,ssc04390:Hippo signaling pathway,ssc04550:Signaling pathways regulating pluripotency of stem cells,ssc04916:Melanogenesis,ssc05166:HTLV-1 infection,ssc05200:Pathways in cancer,ssc05205:Proteoglycans in cancer,ssc05217:Basal cell carcinoma,                                                |
| DistUt | UP   | NCOR2        | nuclear receptor corepressor 2(NCOR2)                                                           | ssc04330:Notch signaling pathway,ssc05169:Epstein-Barr virus infection,                                                                                                                                                                                                                                                       |
| DistUt | UP   | NTRK3        | neurotrophic receptor tyrosine kinase 3(NTRK3)                                                  | ssc04722:Neurotrophin signaling pathway,ssc05230:Central carbon metabolism in cancer,                                                                                                                                                                                                                                         |
| DistUt | UP   | LOC100152489 | olfactory receptor 13C8(LOC100152489)                                                           | ssc04740:Olfactory transduction,                                                                                                                                                                                                                                                                                              |
| DistUt | UP   | SLC15A1      | solute carrier family 15 member 1(SLC15A1)                                                      | ssc04974:Protein digestion and absorption,                                                                                                                                                                                                                                                                                    |
| DistUt | UP   | SLC7A7       | solute carrier family 7 member 7(SLC7A7)                                                        | ssc04974:Protein digestion and absorption,                                                                                                                                                                                                                                                                                    |
| DistUt | UP   | AQP9         | aquaporin 9(AQP9)                                                                               | ssc04976:BILE secretion,                                                                                                                                                                                                                                                                                                      |
| DistUt | UP   | SLC44A1      | solute carrier family 44 member 1(SLC44A1)                                                      | ssc05231:Choline metabolism in cancer,                                                                                                                                                                                                                                                                                        |
| DistUt | DOWN | B4GALT1      | beta-1,4-galactosyltransferase 1(B4GALT1)                                                       | ssc00052:Galactose metabolism,ssc00510:N-Glycan biosynthesis,ssc00514:Other types of O-glycan biosynthesis,ssc00533:Glycosaminoglycan biosynthesis - keratan sulfate,ssc00601:Glycosphingolipid biosynthesis - lacto and neolacto series,ssc01100:Metabolic pathways,                                                         |
| DistUt | DOWN | HSD11B1      | hydroxysteroid 11-beta dehydrogenase 1(HSD11B1)                                                 | ssc00140:Steroid hormone biosynthesis,ssc00980:Metabolism of xenobiotics by cytochrome P450,ssc01100:Metabolic pathways,ssc05204:Chemical carcinogenesis,                                                                                                                                                                     |
| DistUt | DOWN | GUCY1B3      | guanylate cyclase 1, soluble, beta 3(GUCY1B3)                                                   | ssc00230:Purine metabolism,ssc04022:cGMP-PKG signaling pathway,ssc04270:Vascular smooth muscle contraction,ssc04540:Gap junction,ssc04611:Platelet activation,ssc04713:Circadian entrainment,ssc04730:Long-term depression,ssc04921:Oxytocin signaling pathway,ssc04924:Renin secretion,ssc04970:Salivary secretion,          |
| DistUt | DOWN | NPR2         | natriuretic peptide receptor B/guanylate cyclase B (atrialnatriuretic peptide receptor B)(NPR2) | ssc00230:Purine metabolism,ssc04022:cGMP-PKG signaling pathway,ssc04270:Vascular smooth muscle contraction,ssc04921:Oxytocin signaling pathway,                                                                                                                                                                               |
| DistUt | DOWN | PLOD2        | procollagen-lysine,2-oxoglutarate 5-dioxygenase 2(PLOD2)                                        | ssc00310:Lysine degradation,                                                                                                                                                                                                                                                                                                  |
| DistUt | DOWN | GPX8         | glutathione peroxidase 8 (putative)(GPX8)                                                       | ssc00480:Glutathione metabolism,ssc00590:Arachidonic acid metabolism,ssc04918:Thyroid hormone synthesis,                                                                                                                                                                                                                      |
| DistUt | DOWN | GCLM         | glutamate-cysteine ligase modifier subunit(GCLM)                                                | ssc00480:Glutathione metabolism,ssc01100:Metabolic pathways,                                                                                                                                                                                                                                                                  |
| DistUt | DOWN | MAN2A1       | mannosidase alpha class 2A member 1(MAN2A1)                                                     | ssc00510:N-Glycan biosynthesis,ssc01100:Metabolic pathways,                                                                                                                                                                                                                                                                   |
| DistUt | DOWN | MGA T4D      | MGA T4 family member D(MGA T4D)                                                                 | ssc00510:N-Glycan biosynthesis,ssc01100:Metabolic pathways,\                                                                                                                                                                                                                                                                  |
| DistUt | DOWN | GCNT3        | glucosaminyl (N-acetyl) transferase 3, mucin type(GCNT3)                                        | ssc00512:Mucin type O-Glycan biosynthesis,ssc01100:Metabolic pathways,                                                                                                                                                                                                                                                        |
| DistUt | DOWN | LOC100517735 | chondroitin sulfate N-acetylgalactosaminyltransferase 1(LOC100517735)                           | ssc00532:Glycosaminoglycan biosynthesis - chondroitin sulfate / dermatan sulfate,ssc01100:Metabolic pathways,\                                                                                                                                                                                                                |
| DistUt | DOWN | CHSY3        | chondroitin sulfate synthase 3(CHSY3)                                                           | ssc00532:Glycosaminoglycan biosynthesis - chondroitin sulfate / dermatan sulfate,ssc01100:Metabolic pathways,\                                                                                                                                                                                                                |

|        |      |              |                                                                                                |                                                                                                                                                                                                                                                                                                                                                                                                                                                                                                                                                                                                                                                                                                                                                                                                                                                                                                                                                                                                                                                                                                                  |
|--------|------|--------------|------------------------------------------------------------------------------------------------|------------------------------------------------------------------------------------------------------------------------------------------------------------------------------------------------------------------------------------------------------------------------------------------------------------------------------------------------------------------------------------------------------------------------------------------------------------------------------------------------------------------------------------------------------------------------------------------------------------------------------------------------------------------------------------------------------------------------------------------------------------------------------------------------------------------------------------------------------------------------------------------------------------------------------------------------------------------------------------------------------------------------------------------------------------------------------------------------------------------|
| DistUt | DOWN | LOC100518720 | chondroitin sulfate synthase 3(LOC100518720)                                                   | ssc00532:Glycosaminoglycan biosynthesis - chondroitin sulfate / dermatan sulfate,ssc01100:Metabolic pathways,\                                                                                                                                                                                                                                                                                                                                                                                                                                                                                                                                                                                                                                                                                                                                                                                                                                                                                                                                                                                                   |
| DistUt | DOWN | B3GALT2      | beta-1,3-galactosyltransferase 2(B3GALT2)                                                      | ssc00601:Glycosphingolipid biosynthesis - lacto and neolacto series,ssc01100:Metabolic pathways,                                                                                                                                                                                                                                                                                                                                                                                                                                                                                                                                                                                                                                                                                                                                                                                                                                                                                                                                                                                                                 |
| DistUt | DOWN | ME1          | malic enzyme 1(ME1)                                                                            | ssc00620:Pyruvate metabolism,ssc01100:Metabolic pathways,ssc01200:Carbon metabolism,                                                                                                                                                                                                                                                                                                                                                                                                                                                                                                                                                                                                                                                                                                                                                                                                                                                                                                                                                                                                                             |
| DistUt | DOWN | ABCB1        | ATP-binding cassette, sub-family B (MDR/TAP), member 1(ABCB1)                                  | ssc02010:ABC transporters,ssc04976:Bile secretion,ssc05206:MicroRNAs in cancer,                                                                                                                                                                                                                                                                                                                                                                                                                                                                                                                                                                                                                                                                                                                                                                                                                                                                                                                                                                                                                                  |
| DistUt | DOWN | REXO2        | RNA exonuclease 2(REXO2)                                                                       | ssc03008:Ribosome biogenesis in eukaryotes,\                                                                                                                                                                                                                                                                                                                                                                                                                                                                                                                                                                                                                                                                                                                                                                                                                                                                                                                                                                                                                                                                     |
| DistUt | DOWN | PELO         | pelota homolog (Drosophila)(PELO)                                                              | ssc03015:mRNA surveillance pathway,                                                                                                                                                                                                                                                                                                                                                                                                                                                                                                                                                                                                                                                                                                                                                                                                                                                                                                                                                                                                                                                                              |
| DistUt | DOWN | LOC100517820 | proteasome activator complex subunit 4(LOC100517820)                                           | ssc03050:Proteasome,\                                                                                                                                                                                                                                                                                                                                                                                                                                                                                                                                                                                                                                                                                                                                                                                                                                                                                                                                                                                                                                                                                            |
| DistUt | DOWN | SEC63        | SEC63 homolog, protein translocation regulator(SEC63)                                          | ssc03060:Protein export,ssc04141:Protein processing in endoplasmic reticulum,                                                                                                                                                                                                                                                                                                                                                                                                                                                                                                                                                                                                                                                                                                                                                                                                                                                                                                                                                                                                                                    |
| DistUt | DOWN | MMP1         | matrix metalloproteinase 1(MMP1)                                                               | ssc03320:PPAR signaling pathway,ssc05200:Pathways in cancer,ssc05219:Bladder cancer,ssc05323:Rheumatoid arthritis,                                                                                                                                                                                                                                                                                                                                                                                                                                                                                                                                                                                                                                                                                                                                                                                                                                                                                                                                                                                               |
| DistUt | DOWN | FGFR1        | fibroblast growth factor receptor 1(FGFR1)                                                     | ssc04010:MAPK signaling pathway,ssc04014:Ras signaling pathway,ssc04015:Rap1 signaling pathway,ssc04151:PI3K-Akt signaling pathway,ssc04520:Adherens junction,ssc04550:Signaling pathways regulating pluripotency of stem cells,ssc04810:Regulation of actin cytoskeleton,ssc05200:Pathways in cancer,ssc05205:Proteoglycans in cancer,ssc05215:Prostate cancer,ssc05218:Melanoma,ssc05230:Central carbon metabolism in cancer,                                                                                                                                                                                                                                                                                                                                                                                                                                                                                                                                                                                                                                                                                  |
| DistUt | DOWN | FGF2         | fibroblast growth factor 2(FGF2)                                                               | ssc04010:MAPK signaling pathway,ssc04014:Ras signaling pathway,ssc04015:Rap1 signaling pathway,ssc04151:PI3K-Akt signaling pathway,ssc04550:Signaling pathways regulating pluripotency of stem cells,ssc04810:Regulation of actin cytoskeleton,ssc05200:Pathways in cancer,ssc05205:Proteoglycans in cancer,ssc05218:Melanoma,                                                                                                                                                                                                                                                                                                                                                                                                                                                                                                                                                                                                                                                                                                                                                                                   |
| DistUt | DOWN | PPP3CC       | protein phosphatase 3 catalytic subunit gamma(PPP3CC)                                          | ssc04010:MAPK signaling pathway,ssc04020:Calcium signaling pathway,ssc04022:cGMP-PKG signaling pathway,ssc04114:Oocyte meiosis,ssc04310:Wnt signaling pathway,ssc04360:Axon guidance,ssc04370:VEGF signaling pathway,ssc04380:Osteoclast differentiation,ssc04650:Natural killer cell mediated cytotoxicity,ssc04660:T cell receptor signaling pathway,ssc04662:B cell receptor signaling pathway,ssc04720:Long-term potentiation,ssc04724:Glutamatergic synapse,ssc04728:Dopaminergic synapse,ssc04921:Oxytocin signaling pathway,ssc04922:Glucagon signaling pathway,ssc04924:Renin secretion,ssc05010:Alzheimer's disease,ssc05014:Amyotrophic lateral sclerosis (ALS),ssc05031:Amphetamine addiction,ssc05152:Tuberculosis,ssc05166:HTLV-1 infection,\                                                                                                                                                                                                                                                                                                                                                       |
| DistUt | DOWN | RP56KA6      | ribosomal protein S6 kinase A6(RP56KA6)                                                        | ssc04010:MAPK signaling pathway,ssc04114:Oocyte meiosis,ssc04150:mTOR signaling pathway,ssc04720:Long-term potentiation,ssc04722:Neurotrophin signaling pathway,ssc04914:Progesterone-mediated oocyte maturation,ssc04931:Insulin resistance,                                                                                                                                                                                                                                                                                                                                                                                                                                                                                                                                                                                                                                                                                                                                                                                                                                                                    |
| DistUt | DOWN | GNAI1        | G protein subunit alpha i1(GNAI1)                                                              | ssc04015:Rap1 signaling pathway,ssc04022:cGMP-PKG signaling pathway,ssc04024:cAMP signaling pathway,ssc04062:Chemokine signaling pathway,ssc04071:Sphingolipid signaling pathway,ssc04261:Adrenergic signaling in cardiomyocytes,ssc04360:Axon guidance,ssc04540:Gap junction,ssc04611:Platelet activation,ssc04670:Leukocyte transendothelial migration,ssc04713:Circadian entrainment,ssc04723:Retrograde endocannabinoid signaling,ssc04724:Glutamatergic synapse,ssc04725:Cholinergic synapse,ssc04726:Serotonergic synapse,ssc04727:GABAergic synapse,ssc04728:Dopaminergic synapse,ssc04730:Long-term depression,ssc04914:Progesterone-mediated oocyte maturation,ssc04915:Estrogen signaling pathway,ssc04916:Melanogenesis,ssc04921:Oxytocin signaling pathway,ssc04923:Regulation of lipolysis in adipocytes,ssc04924:Renin secretion,ssc04971:Gastric acid secretion,ssc05012:Parkinson's disease,ssc05030:Cocaine addiction,ssc05032:Morphine addiction,ssc05034:Alcoholism,ssc05133:Pertussis,ssc05142:Chagas disease (American trypanosomiasis),ssc05145:Toxoplasmosis,ssc05200:Pathways in cancer, |
| DistUt | DOWN | AGTR1        | angiotensin II receptor type 1(AGTR1)                                                          | ssc04020:Calcium signaling pathway,ssc04022:cGMP-PKG signaling pathway,ssc04080:Neuroactive ligand-receptor interaction,ssc04261:Adrenergic signaling in cardiomyocytes,ssc04270:Vascular smooth muscle contraction,ssc04614:Renin-angiotensin system,ssc04924:Renin secretion,ssc04925:Aldosterone synthesis and secretion,ssc05200:Pathways in cancer,                                                                                                                                                                                                                                                                                                                                                                                                                                                                                                                                                                                                                                                                                                                                                         |
| DistUt | DOWN | PTGFR        | prostaglandin F receptor(PTGFR)                                                                | ssc04020:Calcium signaling pathway,ssc04080:Neuroactive ligand-receptor interaction,                                                                                                                                                                                                                                                                                                                                                                                                                                                                                                                                                                                                                                                                                                                                                                                                                                                                                                                                                                                                                             |
| DistUt | DOWN | HTR2A        | 5-hydroxytryptamine receptor 2A(HTR2A)                                                         | ssc04020:Calcium signaling pathway,ssc04080:Neuroactive ligand-receptor interaction,ssc04540:Gap junction,ssc04726:Serotonergic synapse,ssc04750:Inflammatory mediator regulation of TRP channels,                                                                                                                                                                                                                                                                                                                                                                                                                                                                                                                                                                                                                                                                                                                                                                                                                                                                                                               |
| DistUt | DOWN | HRH1         | histamine receptor H1(HRH1)                                                                    | ssc04020:Calcium signaling pathway,ssc04080:Neuroactive ligand-receptor interaction,ssc04750:Inflammatory mediator regulation of TRP channels,                                                                                                                                                                                                                                                                                                                                                                                                                                                                                                                                                                                                                                                                                                                                                                                                                                                                                                                                                                   |
| DistUt | DOWN | CREB3L2      | cAMP responsive element binding protein 3 like 2(CREB3L2)                                      | ssc04022:cGMP-PKG signaling pathway,ssc04024:cAMP signaling pathway,ssc04151:PI3K-Akt signaling pathway,ssc04152:AMPK signaling pathway,ssc04261:Adrenergic signaling in cardiomyocytes,ssc04668:TNF signaling pathway,ssc04725:Cholinergic synapse,ssc04728:Dopaminergic synapse,ssc04911:Insulin secretion,ssc04915:Estrogen signaling pathway,ssc04916:Melanogenesis,ssc04918:Thyroid hormone synthesis,ssc04922:Glucagon signaling pathway,ssc04925:Aldosterone synthesis and secretion,ssc04931:Insulin resistance,ssc04962:Vasopressin-regulated water reabsorption,ssc05016:Huntington's disease,ssc05030:Cocaine addiction,ssc05031:Amphetamine addiction,ssc05034:Alcoholism,ssc05161:Hepatitis B,ssc05203:Viral carcinogenesis,ssc05215:Prostate cancer,                                                                                                                                                                                                                                                                                                                                               |
| DistUt | DOWN | ACKR3        | atypical chemokine receptor 3(ACKR3)                                                           | ssc04060:Cytokine-cytokine receptor interaction,                                                                                                                                                                                                                                                                                                                                                                                                                                                                                                                                                                                                                                                                                                                                                                                                                                                                                                                                                                                                                                                                 |
| DistUt | DOWN | PLAU         | plasminogen activator, urokinase(PLAU)                                                         | ssc04064:NF-kappa B signaling pathway,ssc04610:Complement and coagulation cascades,ssc05202:Transcriptional misregulation in cancer,ssc05205:Proteoglycans in cancer,ssc05206:MicroRNAs in cancer,                                                                                                                                                                                                                                                                                                                                                                                                                                                                                                                                                                                                                                                                                                                                                                                                                                                                                                               |
| DistUt | DOWN | HIF1A        | hypoxia inducible factor 1, alpha subunit (basic helix-loop-helix transcription factor)(HIF1A) | ssc04066:HIF-1 signaling pathway,ssc04919:Thyroid hormone signaling pathway,ssc05200:Pathways in cancer,ssc05205:Proteoglycans in cancer,ssc05211:Renal cell carcinoma,ssc05230:Central carbon metabolism in cancer,ssc05231:Choline metabolism in cancer,                                                                                                                                                                                                                                                                                                                                                                                                                                                                                                                                                                                                                                                                                                                                                                                                                                                       |
| DistUt | DOWN | S1PR3        | sphingosine-1-phosphate receptor 3(S1PR3)                                                      | ssc04071:Sphingolipid signaling pathway,ssc04080:Neuroactive ligand-receptor interaction,                                                                                                                                                                                                                                                                                                                                                                                                                                                                                                                                                                                                                                                                                                                                                                                                                                                                                                                                                                                                                        |
| DistUt | DOWN | PMAIP1       | phorbol-12-myristate-13-acetate-induced protein 1(PMAIP1)                                      | ssc04115:p53 signaling pathway,ssc05203:Viral carcinogenesis,\                                                                                                                                                                                                                                                                                                                                                                                                                                                                                                                                                                                                                                                                                                                                                                                                                                                                                                                                                                                                                                                   |
| DistUt | DOWN | EDEM3        | ER degradation enhancing alpha-mannosidase like protein 3(EDEM3)                               | ssc04141:Protein processing in endoplasmic reticulum,                                                                                                                                                                                                                                                                                                                                                                                                                                                                                                                                                                                                                                                                                                                                                                                                                                                                                                                                                                                                                                                            |
| DistUt | DOWN | SEC23A       | Sec23 homolog A, coat complex II component(SEC23A)                                             | ssc04141:Protein processing in endoplasmic reticulum,                                                                                                                                                                                                                                                                                                                                                                                                                                                                                                                                                                                                                                                                                                                                                                                                                                                                                                                                                                                                                                                            |
| DistUt | DOWN | SEC23B       | Sec23 homolog B, coat complex II component(SEC23B)                                             | ssc04141:Protein processing in endoplasmic reticulum,                                                                                                                                                                                                                                                                                                                                                                                                                                                                                                                                                                                                                                                                                                                                                                                                                                                                                                                                                                                                                                                            |
| DistUt | DOWN | ERLEC1       | endoplasmic reticulum lectin 1(ERLEC1)                                                         | ssc04141:Protein processing in endoplasmic reticulum,                                                                                                                                                                                                                                                                                                                                                                                                                                                                                                                                                                                                                                                                                                                                                                                                                                                                                                                                                                                                                                                            |
| DistUt | DOWN | ERO1A        | endoplasmic reticulum oxidoreductase 1 alpha(ERO1A)                                            | ssc04141:Protein processing in endoplasmic reticulum,                                                                                                                                                                                                                                                                                                                                                                                                                                                                                                                                                                                                                                                                                                                                                                                                                                                                                                                                                                                                                                                            |
| DistUt | DOWN | UGGT2        | UDP-glucose glycoprotein glucosyltransferase 2(UGGT2)                                          | ssc04141:Protein processing in endoplasmic reticulum,\                                                                                                                                                                                                                                                                                                                                                                                                                                                                                                                                                                                                                                                                                                                                                                                                                                                                                                                                                                                                                                                           |
| DistUt | DOWN | PDI3         | protein disulfide isomerase family A member 3(PDI3)                                            | ssc04141:Protein processing in endoplasmic reticulum,ssc04612:Antigen processing and presentation,                                                                                                                                                                                                                                                                                                                                                                                                                                                                                                                                                                                                                                                                                                                                                                                                                                                                                                                                                                                                               |
| DistUt | DOWN | EIF2AK3      | eukaryotic translation initiation factor 2 alpha kinase 3(EIF2AK3)                             | ssc04141:Protein processing in endoplasmic reticulum,ssc04932:Non-alcoholic fatty liver disease (NAFLD),ssc05010:Alzheimer's disease,ssc05160:Hepatitis C,ssc05162:Measles,ssc05164:Influenza A,ssc05168:Herpes simplex infection,                                                                                                                                                                                                                                                                                                                                                                                                                                                                                                                                                                                                                                                                                                                                                                                                                                                                               |
| DistUt | DOWN | MRC2         | mannose receptor C type 2(MRC2)                                                                | ssc04145:Phagosome,ssc05152:Tuberculosis,                                                                                                                                                                                                                                                                                                                                                                                                                                                                                                                                                                                                                                                                                                                                                                                                                                                                                                                                                                                                                                                                        |
| DistUt | DOWN | COL1A2       | collagen type I alpha 2 chain(COL1A2)                                                          | ssc04151:PI3K-Akt signaling pathway,ssc04510:Focal adhesion,ssc04512:ECM-receptor interaction,ssc04611:Platelet activation,ssc04974:Protein digestion and absorption,ssc05146:Amoebiasis,                                                                                                                                                                                                                                                                                                                                                                                                                                                                                                                                                                                                                                                                                                                                                                                                                                                                                                                        |
| DistUt | DOWN | COL3A1       | collagen type III alpha 1 chain(COL3A1)                                                        | ssc04151:PI3K-Akt signaling pathway,ssc04510:Focal adhesion,ssc04512:ECM-receptor interaction,ssc04611:Platelet activation,ssc04974:Protein digestion and absorption,ssc05146:Amoebiasis,                                                                                                                                                                                                                                                                                                                                                                                                                                                                                                                                                                                                                                                                                                                                                                                                                                                                                                                        |
| DistUt | DOWN | COL5A2       | collagen type V alpha 2 chain(COL5A2)                                                          | ssc04151:PI3K-Akt signaling pathway,ssc04510:Focal adhesion,ssc04512:ECM-receptor interaction,ssc04611:Platelet activation,ssc04974:Protein digestion and absorption,ssc05146:Amoebiasis,                                                                                                                                                                                                                                                                                                                                                                                                                                                                                                                                                                                                                                                                                                                                                                                                                                                                                                                        |
| DistUt | DOWN | COL6A3       | collagen type VI alpha 3 chain(COL6A3)                                                         | ssc04151:PI3K-Akt signaling pathway,ssc04510:Focal adhesion,ssc04512:ECM-receptor interaction,ssc04974:Protein digestion and absorption,                                                                                                                                                                                                                                                                                                                                                                                                                                                                                                                                                                                                                                                                                                                                                                                                                                                                                                                                                                         |
| DistUt | DOWN | COL4A1       | collagen type IV alpha 1 chain(COL4A1)                                                         | ssc04151:PI3K-Akt signaling pathway,ssc04510:Focal adhesion,ssc04512:ECM-receptor interaction,ssc04974:Protein digestion and absorption,ssc05146:Amoebiasis,ssc05200:Pathways in cancer,ssc05222:Small cell lung cancer,                                                                                                                                                                                                                                                                                                                                                                                                                                                                                                                                                                                                                                                                                                                                                                                                                                                                                         |

|        |      |              |                                                                        |                                                                                                                                                                                                                                                                                                                                                                                                                                                                                                                                                                                                                                                                                                                                                                                                                                                                                                                                                                                                                                                                                      |
|--------|------|--------------|------------------------------------------------------------------------|--------------------------------------------------------------------------------------------------------------------------------------------------------------------------------------------------------------------------------------------------------------------------------------------------------------------------------------------------------------------------------------------------------------------------------------------------------------------------------------------------------------------------------------------------------------------------------------------------------------------------------------------------------------------------------------------------------------------------------------------------------------------------------------------------------------------------------------------------------------------------------------------------------------------------------------------------------------------------------------------------------------------------------------------------------------------------------------|
| DistUt | DOWN | TCF7L2       | transcription factor 7 like 2(TCF7L2)                                  | ssc04310:Wnt signaling pathway,ssc04390:Hippo signaling pathway,ssc04520:Adherens junction,ssc04916:Melanogenesis,ssc05200:Pathways in cancer,ssc05210:Colorectal cancer,ssc05213:Endometrial cancer,ssc05215:Prostate cancer,ssc05216:Thyroid cancer,ssc05217:Basal cell carcinoma,ssc05221:Acute myeloid leukemia,ssc05412:Arrhythmogenic right ventricular cardiomyopathy (ARVC),                                                                                                                                                                                                                                                                                                                                                                                                                                                                                                                                                                                                                                                                                                 |
| DistUt | DOWN | WNT2         | Wnt family member 2(WNT2)                                              | ssc04310:Wnt signaling pathway,ssc04390:Hippo signaling pathway,ssc04550:Signaling pathways regulating pluripotency of stem cells,ssc04916:Melanogenesis,ssc05166:HTLV-1 infection,ssc05200:Pathways in cancer,ssc05205:Proteoglycans in cancer,ssc05217:Basal cell carcinoma,                                                                                                                                                                                                                                                                                                                                                                                                                                                                                                                                                                                                                                                                                                                                                                                                       |
| DistUt | DOWN | DCN          | decorin(DCN)                                                           | ssc04350:TGF-beta signaling pathway,ssc05205:Proteoglycans in cancer,                                                                                                                                                                                                                                                                                                                                                                                                                                                                                                                                                                                                                                                                                                                                                                                                                                                                                                                                                                                                                |
| DistUt | DOWN | EPHA4        | EPH receptor A4(EPHA4)                                                 | ssc04360:Axon guidance,                                                                                                                                                                                                                                                                                                                                                                                                                                                                                                                                                                                                                                                                                                                                                                                                                                                                                                                                                                                                                                                              |
| DistUt | DOWN | CFL2         | cofilin 2(CFL2)                                                        | ssc04360:Axon guidance,ssc04666:Fc gamma R-mediated phagocytosis,ssc04810:Regulation of actin cytoskeleton,ssc05133:Pertussis,                                                                                                                                                                                                                                                                                                                                                                                                                                                                                                                                                                                                                                                                                                                                                                                                                                                                                                                                                       |
| DistUt | DOWN | ALCAM        | activated leukocyte cell adhesion molecule(ALCAM)                      | ssc04514:Cell adhesion molecules (CAMs),                                                                                                                                                                                                                                                                                                                                                                                                                                                                                                                                                                                                                                                                                                                                                                                                                                                                                                                                                                                                                                             |
| DistUt | DOWN | VCAN         | versican(VCAN)                                                         | ssc04514:Cell adhesion molecules (CAMs),                                                                                                                                                                                                                                                                                                                                                                                                                                                                                                                                                                                                                                                                                                                                                                                                                                                                                                                                                                                                                                             |
| DistUt | DOWN | CLDN11       | claudin 11(CLDN11)                                                     | ssc04514:Cell adhesion molecules (CAMs),ssc04530:Tight junction,ssc04670:Leukocyte transendothelial migration,ssc05160:Hepatitis C,                                                                                                                                                                                                                                                                                                                                                                                                                                                                                                                                                                                                                                                                                                                                                                                                                                                                                                                                                  |
| DistUt | DOWN | SDC2         | syndecan 2(SDC2)                                                       | ssc04514:Cell adhesion molecules (CAMs),ssc05144:Malaria,ssc05205:Proteoglycans in cancer,                                                                                                                                                                                                                                                                                                                                                                                                                                                                                                                                                                                                                                                                                                                                                                                                                                                                                                                                                                                           |
| DistUt | DOWN | GJA1         | gap junction protein alpha 1(GJA1)                                     | ssc04540:Gap junction,ssc05412:Arrhythmogenic right ventricular cardiomyopathy (ARVC),                                                                                                                                                                                                                                                                                                                                                                                                                                                                                                                                                                                                                                                                                                                                                                                                                                                                                                                                                                                               |
| DistUt | DOWN | PLAUR        | plasminogen activator, urokinase receptor(PLAUR)                       | ssc04610:Complement and coagulation cascades,ssc05205:Proteoglycans in cancer,                                                                                                                                                                                                                                                                                                                                                                                                                                                                                                                                                                                                                                                                                                                                                                                                                                                                                                                                                                                                       |
| DistUt | DOWN | ENPEP        | glutamyl aminopeptidase(ENPEP)                                         | ssc04614:Renin-angiotensin system,                                                                                                                                                                                                                                                                                                                                                                                                                                                                                                                                                                                                                                                                                                                                                                                                                                                                                                                                                                                                                                                   |
| DistUt | DOWN | MARCKS       | myristoylated alanine rich protein kinase C substrate(MARCKS)          | ssc04666:Fc gamma R-mediated phagocytosis,ssc05206:MicroRNAs in cancer, \                                                                                                                                                                                                                                                                                                                                                                                                                                                                                                                                                                                                                                                                                                                                                                                                                                                                                                                                                                                                            |
| DistUt | DOWN | MMP3         | matrix metalloproteinase 3 (stromelysin 1, progelatinase)(MMP3)        | ssc04668:TNF signaling pathway,ssc05202:Transcriptional misregulation in cancer,ssc05323:Rheumatoid arthritis,                                                                                                                                                                                                                                                                                                                                                                                                                                                                                                                                                                                                                                                                                                                                                                                                                                                                                                                                                                       |
| DistUt | DOWN | MAGED1       | MAGE family member D1(MAGED1)                                          | ssc04722:Neurotrophin signaling pathway,                                                                                                                                                                                                                                                                                                                                                                                                                                                                                                                                                                                                                                                                                                                                                                                                                                                                                                                                                                                                                                             |
| DistUt | DOWN | SLC38A1      | solute carrier family 38 member 1(SLC38A1)                             | ssc04724:Glutamatergic synapse,ssc04727:GABAergic synapse,                                                                                                                                                                                                                                                                                                                                                                                                                                                                                                                                                                                                                                                                                                                                                                                                                                                                                                                                                                                                                           |
| DistUt | DOWN | SLC38A2      | solute carrier family 38 member 2(SLC38A2)                             | ssc04724:Glutamatergic synapse,ssc04727:GABAergic synapse,ssc04974:Protein digestion and absorption,                                                                                                                                                                                                                                                                                                                                                                                                                                                                                                                                                                                                                                                                                                                                                                                                                                                                                                                                                                                 |
| DistUt | DOWN | LOC100157704 | olfactory receptor 1L8-like(LOC100157704)                              | ssc04740:Olfactory transduction,                                                                                                                                                                                                                                                                                                                                                                                                                                                                                                                                                                                                                                                                                                                                                                                                                                                                                                                                                                                                                                                     |
| DistUt | DOWN | RCAN2        | regulator of calcineurin 2(RCAN2)                                      | ssc04919:Thyroid hormone signaling pathway,                                                                                                                                                                                                                                                                                                                                                                                                                                                                                                                                                                                                                                                                                                                                                                                                                                                                                                                                                                                                                                          |
| DistUt | DOWN | LOC100512644 | uncharacterized LOC100512644(LOC100512644)                             | ssc04974:Protein digestion and absorption, \                                                                                                                                                                                                                                                                                                                                                                                                                                                                                                                                                                                                                                                                                                                                                                                                                                                                                                                                                                                                                                         |
| DistUt | DOWN | NCEH1        | neutral cholesterol ester hydrolase 1(NCEH1)                           | ssc04976:Bile secretion,                                                                                                                                                                                                                                                                                                                                                                                                                                                                                                                                                                                                                                                                                                                                                                                                                                                                                                                                                                                                                                                             |
| DistUt | DOWN | STEAP2       | STEAP2 metalloproteinase(STEAP2)                                       | ssc04978:Mineral absorption,                                                                                                                                                                                                                                                                                                                                                                                                                                                                                                                                                                                                                                                                                                                                                                                                                                                                                                                                                                                                                                                         |
| DistUt | DOWN | TGM2         | transglutaminase 2(TGM2)                                               | ssc05016:Huntington's disease,                                                                                                                                                                                                                                                                                                                                                                                                                                                                                                                                                                                                                                                                                                                                                                                                                                                                                                                                                                                                                                                       |
| DistUt | DOWN | PRNP         | prion protein(PRNP)                                                    | ssc05020:Prion diseases,                                                                                                                                                                                                                                                                                                                                                                                                                                                                                                                                                                                                                                                                                                                                                                                                                                                                                                                                                                                                                                                             |
| DistUt | DOWN | HCFC2        | host cell factor C2(HCFC2)                                             | ssc05168:Herpes simplex infection,                                                                                                                                                                                                                                                                                                                                                                                                                                                                                                                                                                                                                                                                                                                                                                                                                                                                                                                                                                                                                                                   |
| DistUt | DOWN | AFF1         | AF4/FMR2 family member 1(AFF1)                                         | ssc05202:Transcriptional misregulation in cancer, \                                                                                                                                                                                                                                                                                                                                                                                                                                                                                                                                                                                                                                                                                                                                                                                                                                                                                                                                                                                                                                  |
| ProxUt | UP   | ALDH2        | aldehyde dehydrogenase 2 family (mitochondrial)(ALDH2)                 | ssc00010:Glycolysis / Gluconeogenesis,ssc00053:Ascorbate and aldarate metabolism,ssc00071:Fatty acid degradation,ssc00280:Valine, leucine and isoleucine degradation,ssc00310:Lysine degradation,ssc00330:Arginine and proline metabolism,ssc00340:Histidine metabolism,ssc00380:Tryptophan metabolism,ssc00410:beta-Alanine metabolism,ssc00561:Glycerolipid metabolism,ssc00620:Pyruvate metabolism,ssc01100:Metabolic pathways,ssc01130:Biosynthesis of antibiotics,                                                                                                                                                                                                                                                                                                                                                                                                                                                                                                                                                                                                              |
| ProxUt | UP   | CRYL1        | crystallin lambda 1(CRYL1)                                             | ssc00040:Fructose and glucuronate interconversions,ssc01100:Metabolic pathways,                                                                                                                                                                                                                                                                                                                                                                                                                                                                                                                                                                                                                                                                                                                                                                                                                                                                                                                                                                                                      |
| ProxUt | UP   | KHK          | ketohexokinase(KHK)                                                    | ssc00051:Fructose and mannose metabolism,ssc01100:Metabolic pathways,                                                                                                                                                                                                                                                                                                                                                                                                                                                                                                                                                                                                                                                                                                                                                                                                                                                                                                                                                                                                                |
| ProxUt | UP   | GALK1        | galactokinase 1(GALK1)                                                 | ssc00052:Galactose metabolism,ssc00520:Amino sugar and nucleotide sugar metabolism,ssc01100:Metabolic pathways,                                                                                                                                                                                                                                                                                                                                                                                                                                                                                                                                                                                                                                                                                                                                                                                                                                                                                                                                                                      |
| ProxUt | UP   | LOC100515137 | 5-oxoprolinase-like(LOC100515137)                                      | ssc00480:Glutathione metabolism, \                                                                                                                                                                                                                                                                                                                                                                                                                                                                                                                                                                                                                                                                                                                                                                                                                                                                                                                                                                                                                                                   |
| ProxUt | UP   | CHST4        | carbohydrate sulfotransferase 4(CHST4)                                 | ssc00533:Glycosaminoglycan biosynthesis - keratan sulfate,                                                                                                                                                                                                                                                                                                                                                                                                                                                                                                                                                                                                                                                                                                                                                                                                                                                                                                                                                                                                                           |
| ProxUt | UP   | DGAT1        | diacylglycerol O-acyltransferase 1(DGAT1)                              | ssc00561:Glycerolipid metabolism,ssc00830:Retinol metabolism,ssc01100:Metabolic pathways,ssc04975:Fat digestion and absorption,                                                                                                                                                                                                                                                                                                                                                                                                                                                                                                                                                                                                                                                                                                                                                                                                                                                                                                                                                      |
| ProxUt | UP   | MTMR7        | myotubularin related protein 7(MTMR7)                                  | ssc00562:Inositol phosphate metabolism,ssc01100:Metabolic pathways,ssc04070:Phosphatidylinositol signaling system,                                                                                                                                                                                                                                                                                                                                                                                                                                                                                                                                                                                                                                                                                                                                                                                                                                                                                                                                                                   |
| ProxUt | UP   | LOC100739011 | putative lipoyltransferase 2, mitochondrial(LOC100739011)              | ssc00785:Lipoic acid metabolism,ssc01100:Metabolic pathways,                                                                                                                                                                                                                                                                                                                                                                                                                                                                                                                                                                                                                                                                                                                                                                                                                                                                                                                                                                                                                         |
| ProxUt | UP   | SPR          | sepiapterin reductase (7,8-dihydrobiopterin:NADP+ oxidoreductase)(SPR) | ssc00790:Folate biosynthesis,ssc01100:Metabolic pathways,                                                                                                                                                                                                                                                                                                                                                                                                                                                                                                                                                                                                                                                                                                                                                                                                                                                                                                                                                                                                                            |
| ProxUt | UP   | SDR16C5      | short chain dehydrogenase/reductase family 16C, member 5(SDR16C5)      | ssc00830:Retinol metabolism,                                                                                                                                                                                                                                                                                                                                                                                                                                                                                                                                                                                                                                                                                                                                                                                                                                                                                                                                                                                                                                                         |
| ProxUt | UP   | XAB2         | XPA binding protein 2(XAB2)                                            | ssc03040:Spliceosome,                                                                                                                                                                                                                                                                                                                                                                                                                                                                                                                                                                                                                                                                                                                                                                                                                                                                                                                                                                                                                                                                |
| ProxUt | UP   | LOC100516539 | splicing factor 3A subunit 2(LOC100516539)                             | ssc03040:Spliceosome, \                                                                                                                                                                                                                                                                                                                                                                                                                                                                                                                                                                                                                                                                                                                                                                                                                                                                                                                                                                                                                                                              |
| ProxUt | UP   | DDB1         | damage specific DNA binding protein 1(DDB1)                            | ssc03420:Nucleotide excision repair,ssc04120:Ubiquitin mediated proteolysis,ssc05161:Hepatitis B,ssc05203:Viral carcinogenesis,                                                                                                                                                                                                                                                                                                                                                                                                                                                                                                                                                                                                                                                                                                                                                                                                                                                                                                                                                      |
| ProxUt | UP   | HSPB1        | heat shock protein family B (small) member 1(HSPB1)                    | ssc04010:MAPK signaling pathway,ssc04370:VEGF signaling pathway,ssc05146:Amoebiasis,                                                                                                                                                                                                                                                                                                                                                                                                                                                                                                                                                                                                                                                                                                                                                                                                                                                                                                                                                                                                 |
| ProxUt | UP   | MAPT         | microtubule associated protein tau(MAPT)                               | ssc04010:MAPK signaling pathway,ssc05010:Alzheimer's disease,                                                                                                                                                                                                                                                                                                                                                                                                                                                                                                                                                                                                                                                                                                                                                                                                                                                                                                                                                                                                                        |
| ProxUt | UP   | CALM1        | calmodulin 1(CALM1)                                                    | ssc04014:Ras signaling pathway,ssc04015:Rap1 signaling pathway,ssc04020:Calcium signaling pathway,ssc04022:cGMP-PKG signaling pathway,ssc04024:cAMP signaling pathway,ssc04070:Phosphatidylinositol signaling system,ssc04114:Oocyte meiosis,ssc04261:Adrenergic signaling in cardiomyocytes,ssc04270:Vascular smooth muscle contraction,ssc04713:Circadian entrainment,ssc04720:Long-term potentiation,ssc04722:Neurotrophin signaling pathway,ssc04728:Dopaminergic synapse,ssc04740:Olfactory transduction,ssc04744:Phototransduction,ssc04750:Inflammatory mediator regulation of TRP channels,ssc04910:Insulin signaling pathway,ssc04912:GnRH signaling pathway,ssc04915:Estrogen signaling pathway,ssc04916:Melanogenesis,ssc04921:Oxytocin signaling pathway,ssc04922:Glucagon signaling pathway,ssc04924:Renin secretion,ssc04925:Aldosterone synthesis and secretion,ssc04970:Salivary secretion,ssc04971:Gastric acid secretion,ssc05010:Alzheimer's disease,ssc05031:Amphetamine addiction,ssc05034:Alcoholism,ssc05133:Pertussis,ssc05152:Tuberculosis,ssc05214:Glioma, |
| ProxUt | UP   | ADRA1A       | adrenoceptor alpha 1A(ADRA1A)                                          | ssc04020:Calcium signaling pathway,ssc04022:cGMP-PKG signaling pathway,ssc04080:Neuroactive ligand-receptor interaction,ssc04152:AMPK signaling pathway,ssc04261:Adrenergic signaling in cardiomyocytes,ssc04270:Vascular smooth muscle contraction,ssc04970:Salivary secretion,                                                                                                                                                                                                                                                                                                                                                                                                                                                                                                                                                                                                                                                                                                                                                                                                     |
| ProxUt | UP   | ADRA2A       | adrenoceptor alpha 2A(ADRA2A)                                          | ssc04022:cGMP-PKG signaling pathway,ssc04080:Neuroactive ligand-receptor interaction,                                                                                                                                                                                                                                                                                                                                                                                                                                                                                                                                                                                                                                                                                                                                                                                                                                                                                                                                                                                                |

|        |      |              |                                                                           |                                                                                                                                                                                                                                                                                                                                                                                                                                                                                                                                                                                                                                                                                                                                                                                                                                                                                                                                                                                                                                                                                                                                                                                                                                                                                                                                                                                                                                                                                                                                                                                                                                                                                                                                                                                                                                                                                                                                                                                                                                                                                                                                                                                                                                                                                                                                                                                                                                                                     |
|--------|------|--------------|---------------------------------------------------------------------------|---------------------------------------------------------------------------------------------------------------------------------------------------------------------------------------------------------------------------------------------------------------------------------------------------------------------------------------------------------------------------------------------------------------------------------------------------------------------------------------------------------------------------------------------------------------------------------------------------------------------------------------------------------------------------------------------------------------------------------------------------------------------------------------------------------------------------------------------------------------------------------------------------------------------------------------------------------------------------------------------------------------------------------------------------------------------------------------------------------------------------------------------------------------------------------------------------------------------------------------------------------------------------------------------------------------------------------------------------------------------------------------------------------------------------------------------------------------------------------------------------------------------------------------------------------------------------------------------------------------------------------------------------------------------------------------------------------------------------------------------------------------------------------------------------------------------------------------------------------------------------------------------------------------------------------------------------------------------------------------------------------------------------------------------------------------------------------------------------------------------------------------------------------------------------------------------------------------------------------------------------------------------------------------------------------------------------------------------------------------------------------------------------------------------------------------------------------------------|
| ProxUt | UP   | GRK1         | G protein-coupled receptor kinase 1(GRK1)                                 | ssc04062:Chemokine signaling pathway,ssc04144:Endocytosis,ssc04744:Phototransduction,                                                                                                                                                                                                                                                                                                                                                                                                                                                                                                                                                                                                                                                                                                                                                                                                                                                                                                                                                                                                                                                                                                                                                                                                                                                                                                                                                                                                                                                                                                                                                                                                                                                                                                                                                                                                                                                                                                                                                                                                                                                                                                                                                                                                                                                                                                                                                                               |
| ProxUt | UP   | STK11        | serine/threonine kinase 11(STK11)                                         | ssc04068:FoxO signaling pathway,ssc04150:mTOR signaling pathway,ssc04151:PI3K-Akt signaling pathway,ssc04920:Adipocytokine signaling pathway,                                                                                                                                                                                                                                                                                                                                                                                                                                                                                                                                                                                                                                                                                                                                                                                                                                                                                                                                                                                                                                                                                                                                                                                                                                                                                                                                                                                                                                                                                                                                                                                                                                                                                                                                                                                                                                                                                                                                                                                                                                                                                                                                                                                                                                                                                                                       |
| ProxUt | UP   | RXFP4        | relaxin/insulin like family peptide receptor 4(RXFP4)                     | ssc04080:Neuroactive ligand-receptor interaction,                                                                                                                                                                                                                                                                                                                                                                                                                                                                                                                                                                                                                                                                                                                                                                                                                                                                                                                                                                                                                                                                                                                                                                                                                                                                                                                                                                                                                                                                                                                                                                                                                                                                                                                                                                                                                                                                                                                                                                                                                                                                                                                                                                                                                                                                                                                                                                                                                   |
| ProxUt | UP   | VIPR1        | vasoactive intestinal peptide receptor 1(VIPR1)                           | ssc04080:Neuroactive ligand-receptor interaction,                                                                                                                                                                                                                                                                                                                                                                                                                                                                                                                                                                                                                                                                                                                                                                                                                                                                                                                                                                                                                                                                                                                                                                                                                                                                                                                                                                                                                                                                                                                                                                                                                                                                                                                                                                                                                                                                                                                                                                                                                                                                                                                                                                                                                                                                                                                                                                                                                   |
| ProxUt | UP   | LOC100738970 | CXXC-type zinc finger protein 4(LOC100738970)                             | ssc04310:Wnt signaling pathway,\                                                                                                                                                                                                                                                                                                                                                                                                                                                                                                                                                                                                                                                                                                                                                                                                                                                                                                                                                                                                                                                                                                                                                                                                                                                                                                                                                                                                                                                                                                                                                                                                                                                                                                                                                                                                                                                                                                                                                                                                                                                                                                                                                                                                                                                                                                                                                                                                                                    |
| ProxUt | UP   | KCNQ4        | potassium voltage-gated channel subfamily Q member 4(KCNQ4)               | ssc04725:Cholinergic synapse,                                                                                                                                                                                                                                                                                                                                                                                                                                                                                                                                                                                                                                                                                                                                                                                                                                                                                                                                                                                                                                                                                                                                                                                                                                                                                                                                                                                                                                                                                                                                                                                                                                                                                                                                                                                                                                                                                                                                                                                                                                                                                                                                                                                                                                                                                                                                                                                                                                       |
| ProxUt | UP   | LOC100524975 | olfactory receptor 10H1(LOC100524975)                                     | ssc04740:Olfactory transduction,                                                                                                                                                                                                                                                                                                                                                                                                                                                                                                                                                                                                                                                                                                                                                                                                                                                                                                                                                                                                                                                                                                                                                                                                                                                                                                                                                                                                                                                                                                                                                                                                                                                                                                                                                                                                                                                                                                                                                                                                                                                                                                                                                                                                                                                                                                                                                                                                                                    |
| ProxUt | UP   | LOC100516511 | olfactory receptor 1A1(LOC100516511)                                      | ssc04740:Olfactory transduction,                                                                                                                                                                                                                                                                                                                                                                                                                                                                                                                                                                                                                                                                                                                                                                                                                                                                                                                                                                                                                                                                                                                                                                                                                                                                                                                                                                                                                                                                                                                                                                                                                                                                                                                                                                                                                                                                                                                                                                                                                                                                                                                                                                                                                                                                                                                                                                                                                                    |
| ProxUt | UP   | LOC100521466 | olfactory receptor 52L1(LOC100521466)                                     | ssc04740:Olfactory transduction,\                                                                                                                                                                                                                                                                                                                                                                                                                                                                                                                                                                                                                                                                                                                                                                                                                                                                                                                                                                                                                                                                                                                                                                                                                                                                                                                                                                                                                                                                                                                                                                                                                                                                                                                                                                                                                                                                                                                                                                                                                                                                                                                                                                                                                                                                                                                                                                                                                                   |
| ProxUt | UP   | LOC100517804 | putative olfactory receptor 5AK3(LOC100517804)                            | ssc04740:Olfactory transduction,\                                                                                                                                                                                                                                                                                                                                                                                                                                                                                                                                                                                                                                                                                                                                                                                                                                                                                                                                                                                                                                                                                                                                                                                                                                                                                                                                                                                                                                                                                                                                                                                                                                                                                                                                                                                                                                                                                                                                                                                                                                                                                                                                                                                                                                                                                                                                                                                                                                   |
| ProxUt | UP   | TMSB4X       | thymosin beta 4, X-linked(TMSB4X)                                         | ssc04810:Regulation of actin cytoskeleton,                                                                                                                                                                                                                                                                                                                                                                                                                                                                                                                                                                                                                                                                                                                                                                                                                                                                                                                                                                                                                                                                                                                                                                                                                                                                                                                                                                                                                                                                                                                                                                                                                                                                                                                                                                                                                                                                                                                                                                                                                                                                                                                                                                                                                                                                                                                                                                                                                          |
| ProxUt | UP   | ASGR2        | asialoglycoprotein receptor 2(ASGR2)                                      | ssc04918:Thyroid hormone synthesis,                                                                                                                                                                                                                                                                                                                                                                                                                                                                                                                                                                                                                                                                                                                                                                                                                                                                                                                                                                                                                                                                                                                                                                                                                                                                                                                                                                                                                                                                                                                                                                                                                                                                                                                                                                                                                                                                                                                                                                                                                                                                                                                                                                                                                                                                                                                                                                                                                                 |
| ProxUt | UP   | MLXIP        | MLX interacting protein(MLXIP)                                            | ssc04931:Insulin resistance,ssc04932:Non-alcoholic fatty liver disease (NAFLD),                                                                                                                                                                                                                                                                                                                                                                                                                                                                                                                                                                                                                                                                                                                                                                                                                                                                                                                                                                                                                                                                                                                                                                                                                                                                                                                                                                                                                                                                                                                                                                                                                                                                                                                                                                                                                                                                                                                                                                                                                                                                                                                                                                                                                                                                                                                                                                                     |
| ProxUt | UP   | HSF1         | heat shock transcription factor 1(HSF1)                                   | ssc05134:Legionellosis,                                                                                                                                                                                                                                                                                                                                                                                                                                                                                                                                                                                                                                                                                                                                                                                                                                                                                                                                                                                                                                                                                                                                                                                                                                                                                                                                                                                                                                                                                                                                                                                                                                                                                                                                                                                                                                                                                                                                                                                                                                                                                                                                                                                                                                                                                                                                                                                                                                             |
| ProxUt | DOWN | B4GALT1      | beta-1,4-galactosyltransferase 1(B4GALT1)                                 | ssc00052:Galactose metabolism,ssc00510:N-Glycan biosynthesis,ssc00514:Other types of O-glycan biosynthesis,ssc00533:Glycosaminoglycan biosynthesis - keratan sulfate,ssc00601:Glycosphingolipid biosynthesis - lacto and neolacto series,ssc01100:Metabolic pathways,                                                                                                                                                                                                                                                                                                                                                                                                                                                                                                                                                                                                                                                                                                                                                                                                                                                                                                                                                                                                                                                                                                                                                                                                                                                                                                                                                                                                                                                                                                                                                                                                                                                                                                                                                                                                                                                                                                                                                                                                                                                                                                                                                                                               |
| ProxUt | DOWN | HSD11B1      | hydroxysteroid 11-beta dehydrogenase 1(HSD11B1)                           | ssc00140:Steroid hormone biosynthesis,ssc00980:Metabolism of xenobiotics by cytochrome P450,ssc01100:Metabolic pathways,ssc05204:Chemical carcinogenesis,                                                                                                                                                                                                                                                                                                                                                                                                                                                                                                                                                                                                                                                                                                                                                                                                                                                                                                                                                                                                                                                                                                                                                                                                                                                                                                                                                                                                                                                                                                                                                                                                                                                                                                                                                                                                                                                                                                                                                                                                                                                                                                                                                                                                                                                                                                           |
| ProxUt | DOWN | ENTPD5       | ectonucleoside triphosphate diphosphohydrolase 5(ENTPD5)                  | ssc00230:Purine metabolism,ssc00240:Pyrimidine metabolism,                                                                                                                                                                                                                                                                                                                                                                                                                                                                                                                                                                                                                                                                                                                                                                                                                                                                                                                                                                                                                                                                                                                                                                                                                                                                                                                                                                                                                                                                                                                                                                                                                                                                                                                                                                                                                                                                                                                                                                                                                                                                                                                                                                                                                                                                                                                                                                                                          |
| ProxUt | DOWN | PDE7B        | phosphodiesterase 7B(PDE7B)                                               | ssc00230:Purine metabolism,ssc05032:Morphine addiction,                                                                                                                                                                                                                                                                                                                                                                                                                                                                                                                                                                                                                                                                                                                                                                                                                                                                                                                                                                                                                                                                                                                                                                                                                                                                                                                                                                                                                                                                                                                                                                                                                                                                                                                                                                                                                                                                                                                                                                                                                                                                                                                                                                                                                                                                                                                                                                                                             |
| ProxUt | DOWN | DCITD        | dCMP deaminase(DCITD)                                                     | ssc00240:Pyrimidine metabolism,ssc01100:Metabolic pathways,                                                                                                                                                                                                                                                                                                                                                                                                                                                                                                                                                                                                                                                                                                                                                                                                                                                                                                                                                                                                                                                                                                                                                                                                                                                                                                                                                                                                                                                                                                                                                                                                                                                                                                                                                                                                                                                                                                                                                                                                                                                                                                                                                                                                                                                                                                                                                                                                         |
| ProxUt | DOWN | PLOD2        | procollagen-lysine,2-oxoglutarate 5-dioxygenase 2(PLOD2)                  | ssc00310:Lysine degradation,                                                                                                                                                                                                                                                                                                                                                                                                                                                                                                                                                                                                                                                                                                                                                                                                                                                                                                                                                                                                                                                                                                                                                                                                                                                                                                                                                                                                                                                                                                                                                                                                                                                                                                                                                                                                                                                                                                                                                                                                                                                                                                                                                                                                                                                                                                                                                                                                                                        |
| ProxUt | DOWN | GPX8         | glutathione peroxidase 8 (putative)(GPX8)                                 | ssc00480:Glutathione metabolism,ssc00590:Arachidonic acid metabolism,ssc04918:Thyroid hormone synthesis,                                                                                                                                                                                                                                                                                                                                                                                                                                                                                                                                                                                                                                                                                                                                                                                                                                                                                                                                                                                                                                                                                                                                                                                                                                                                                                                                                                                                                                                                                                                                                                                                                                                                                                                                                                                                                                                                                                                                                                                                                                                                                                                                                                                                                                                                                                                                                            |
| ProxUt | DOWN | MAN2A1       | mannosidase alpha class 2A member 1(MAN2A1)                               | ssc00510:N-Glycan biosynthesis,ssc01100:Metabolic pathways,                                                                                                                                                                                                                                                                                                                                                                                                                                                                                                                                                                                                                                                                                                                                                                                                                                                                                                                                                                                                                                                                                                                                                                                                                                                                                                                                                                                                                                                                                                                                                                                                                                                                                                                                                                                                                                                                                                                                                                                                                                                                                                                                                                                                                                                                                                                                                                                                         |
| ProxUt | DOWN | MGAT4D       | MGAT4 family member D(MGAT4D)                                             | ssc00510:N-Glycan biosynthesis,ssc01100:Metabolic pathways,\                                                                                                                                                                                                                                                                                                                                                                                                                                                                                                                                                                                                                                                                                                                                                                                                                                                                                                                                                                                                                                                                                                                                                                                                                                                                                                                                                                                                                                                                                                                                                                                                                                                                                                                                                                                                                                                                                                                                                                                                                                                                                                                                                                                                                                                                                                                                                                                                        |
| ProxUt | DOWN | MAN1A1       | mannosidase alpha class 1A member 1(MAN1A1)                               | ssc00510:N-Glycan biosynthesis,ssc01100:Metabolic pathways,ssc04141:Protein processing in endoplasmic reticulum,                                                                                                                                                                                                                                                                                                                                                                                                                                                                                                                                                                                                                                                                                                                                                                                                                                                                                                                                                                                                                                                                                                                                                                                                                                                                                                                                                                                                                                                                                                                                                                                                                                                                                                                                                                                                                                                                                                                                                                                                                                                                                                                                                                                                                                                                                                                                                    |
| ProxUt | DOWN | GCNT3        | glucosaminyl (N-acetyl) transferase 3, mucin type(GCNT3)                  | ssc00512:Mucin type O-Glycan biosynthesis,ssc01100:Metabolic pathways,                                                                                                                                                                                                                                                                                                                                                                                                                                                                                                                                                                                                                                                                                                                                                                                                                                                                                                                                                                                                                                                                                                                                                                                                                                                                                                                                                                                                                                                                                                                                                                                                                                                                                                                                                                                                                                                                                                                                                                                                                                                                                                                                                                                                                                                                                                                                                                                              |
| ProxUt | DOWN | CHSY3        | chondroitin sulfate synthase 3(CHSY3)                                     | ssc00532:Glycosaminoglycan biosynthesis - chondroitin sulfate / dermatan sulfate,ssc01100:Metabolic pathways,\                                                                                                                                                                                                                                                                                                                                                                                                                                                                                                                                                                                                                                                                                                                                                                                                                                                                                                                                                                                                                                                                                                                                                                                                                                                                                                                                                                                                                                                                                                                                                                                                                                                                                                                                                                                                                                                                                                                                                                                                                                                                                                                                                                                                                                                                                                                                                      |
| ProxUt | DOWN | LOC100518720 | chondroitin sulfate synthase 3(LOC100518720)                              | ssc00532:Glycosaminoglycan biosynthesis - chondroitin sulfate / dermatan sulfate,ssc01100:Metabolic pathways,\                                                                                                                                                                                                                                                                                                                                                                                                                                                                                                                                                                                                                                                                                                                                                                                                                                                                                                                                                                                                                                                                                                                                                                                                                                                                                                                                                                                                                                                                                                                                                                                                                                                                                                                                                                                                                                                                                                                                                                                                                                                                                                                                                                                                                                                                                                                                                      |
| ProxUt | DOWN | B3GNT2       | UDP-GlcNAc:betaGal beta-1,3-N-acetylglucosaminyltransferase 2(B3GNT2)     | ssc00533:Glycosaminoglycan biosynthesis - keratan sulfate,ssc00601:Glycosphingolipid biosynthesis - lacto and neolacto series,ssc01100:Metabolic pathways,                                                                                                                                                                                                                                                                                                                                                                                                                                                                                                                                                                                                                                                                                                                                                                                                                                                                                                                                                                                                                                                                                                                                                                                                                                                                                                                                                                                                                                                                                                                                                                                                                                                                                                                                                                                                                                                                                                                                                                                                                                                                                                                                                                                                                                                                                                          |
| ProxUt | DOWN | GPD2         | glycerol-3-phosphate dehydrogenase 2(GPD2)                                | ssc00564:Glycerophospholipid metabolism,                                                                                                                                                                                                                                                                                                                                                                                                                                                                                                                                                                                                                                                                                                                                                                                                                                                                                                                                                                                                                                                                                                                                                                                                                                                                                                                                                                                                                                                                                                                                                                                                                                                                                                                                                                                                                                                                                                                                                                                                                                                                                                                                                                                                                                                                                                                                                                                                                            |
| ProxUt | DOWN | B3GALT2      | beta-1,3-galactosyltransferase 2(B3GALT2)                                 | ssc00601:Glycosphingolipid biosynthesis - lacto and neolacto series,ssc01100:Metabolic pathways,                                                                                                                                                                                                                                                                                                                                                                                                                                                                                                                                                                                                                                                                                                                                                                                                                                                                                                                                                                                                                                                                                                                                                                                                                                                                                                                                                                                                                                                                                                                                                                                                                                                                                                                                                                                                                                                                                                                                                                                                                                                                                                                                                                                                                                                                                                                                                                    |
| ProxUt | DOWN | VNN1         | vanin 1(VNN1)                                                             | ssc00770:Pantothenate and CoA biosynthesis,                                                                                                                                                                                                                                                                                                                                                                                                                                                                                                                                                                                                                                                                                                                                                                                                                                                                                                                                                                                                                                                                                                                                                                                                                                                                                                                                                                                                                                                                                                                                                                                                                                                                                                                                                                                                                                                                                                                                                                                                                                                                                                                                                                                                                                                                                                                                                                                                                         |
| ProxUt | DOWN | ABCB1        | ATP-binding cassette, sub-family B (MDR/TAP), member 1(ABCB1)             | ssc02010:ABC transporters,ssc04976:BILE secretion,ssc05206:MicroRNAs in cancer,                                                                                                                                                                                                                                                                                                                                                                                                                                                                                                                                                                                                                                                                                                                                                                                                                                                                                                                                                                                                                                                                                                                                                                                                                                                                                                                                                                                                                                                                                                                                                                                                                                                                                                                                                                                                                                                                                                                                                                                                                                                                                                                                                                                                                                                                                                                                                                                     |
| ProxUt | DOWN | SRP54        | signal recognition particle 54(SRP54)                                     | ssc03060:Protein export,                                                                                                                                                                                                                                                                                                                                                                                                                                                                                                                                                                                                                                                                                                                                                                                                                                                                                                                                                                                                                                                                                                                                                                                                                                                                                                                                                                                                                                                                                                                                                                                                                                                                                                                                                                                                                                                                                                                                                                                                                                                                                                                                                                                                                                                                                                                                                                                                                                            |
| ProxUt | DOWN | MMP1         | matrix metalloproteinase 1(MMP1)                                          | ssc03320:PPAR signaling pathway,ssc05200:Pathways in cancer,ssc05219:Bladder cancer,ssc05323:Rheumatoid arthritis,                                                                                                                                                                                                                                                                                                                                                                                                                                                                                                                                                                                                                                                                                                                                                                                                                                                                                                                                                                                                                                                                                                                                                                                                                                                                                                                                                                                                                                                                                                                                                                                                                                                                                                                                                                                                                                                                                                                                                                                                                                                                                                                                                                                                                                                                                                                                                  |
| ProxUt | DOWN | LOC100736973 | ras-related protein Rap-1b(LOC100736973)                                  | ssc04010:MAPK signaling pathway,ssc04014:Ras signaling pathway,ssc04015:Rap1 signaling pathway,ssc04024:cAMP signaling pathway,ssc04062:Chemokine signaling pathway,ssc04510:Focal adhesion,ssc04611:Platelet activation,ssc04670:Leukocyte transendothelial migration,ssc04720:Long-term potentiation,ssc04722:Neurotrophin signaling pathway,ssc04972:Pancreatic secretion,ssc05211:Renal cell carcinoma,                                                                                                                                                                                                                                                                                                                                                                                                                                                                                                                                                                                                                                                                                                                                                                                                                                                                                                                                                                                                                                                                                                                                                                                                                                                                                                                                                                                                                                                                                                                                                                                                                                                                                                                                                                                                                                                                                                                                                                                                                                                         |
| ProxUt | DOWN | PPP3CC       | protein phosphatase 3 catalytic subunit gamma(PPP3CC)                     | ssc04010:MAPK signaling pathway,ssc04020:Calcium signaling pathway,ssc04022:cGMP-PKG signaling pathway,ssc04114:Oocyte meiosis,ssc04310:Wnt signaling pathway,ssc04360:Axon guidance,ssc04370:VEGF signaling pathway,ssc04380:Osteoclast differentiation,ssc04650:Natural killer cell mediated cytotoxicity,ssc04660:T cell receptor signaling pathway,ssc04662:B cell receptor signaling pathway,ssc04720:Long-term potentiation,ssc04724:Glutamatergic synapse,ssc04728:Dopaminergic synapse,ssc04921:Oxytocin signaling pathway,ssc04922:Glucagon signaling pathway,ssc04924:Renin secretion,ssc05010:Alzheimer's disease,ssc05014:Amyotrophic lateral sclerosis (ALS),ssc05031:Amphetamine addiction,ssc05152:Tuberculosis,ssc05166:HTLV-I infection,\                                                                                                                                                                                                                                                                                                                                                                                                                                                                                                                                                                                                                                                                                                                                                                                                                                                                                                                                                                                                                                                                                                                                                                                                                                                                                                                                                                                                                                                                                                                                                                                                                                                                                                          |
| ProxUt | DOWN | LOC100623707 | phosphatidylinositol 3-kinase regulatory subunit alpha-like(LOC100623707) | ssc04012:Erbb signaling pathway,ssc04014:Ras signaling pathway,ssc04015:Rap1 signaling pathway,ssc04024:cAMP signaling pathway,ssc04062:Chemokine signaling pathway,ssc04066:HIF-1 signaling pathway,ssc04068:FoxO signaling pathway,ssc04070:Phosphatidylinositol signaling system,ssc04071:Sphingolipid signaling pathway,ssc04150:mTOR signaling pathway,ssc04151:PI3K-Akt signaling pathway,ssc04152:AMPK signaling pathway,ssc04210:Apoptosis,ssc04370:VEGF signaling pathway,ssc04380:Osteoclast differentiation,ssc04510:Focal adhesion,ssc04550:Signaling pathways regulating pluripotency of stem cells,ssc04611:Platelet activation,ssc04620:Toll-like receptor signaling pathway,ssc04630:Jak-STAT signaling pathway,ssc04650:Natural killer cell mediated cytotoxicity,ssc04660:T cell receptor signaling pathway,ssc04662:B cell receptor signaling pathway,ssc04664:Fc epsilon RI signaling pathway,ssc04666:Fc gamma R-mediated phagocytosis,ssc04668:TNF signaling pathway,ssc04670:Leukocyte transendothelial migration,ssc04722:Neurotrophin signaling pathway,ssc04725:Cholinergic synapse,ssc04750:Inflammatory mediator regulation of TRP channels,ssc04810:Regulation of actin cytoskeleton,ssc04910:Insulin signaling pathway,ssc04914:Progesterone-mediated oocyte maturation,ssc04915:Estrogen signaling pathway,ssc04917:Prolactin signaling pathway,ssc04919:Thyroid hormone signaling pathway,ssc04923:Regulation of lipolysis in adipocytes,ssc04930:Type II diabetes mellitus,ssc04931:Insulin resistance,ssc04932:Non-alcoholic fatty liver disease (NAFLD),ssc04960:Aldosterone-regulated sodium reabsorption,ssc04973:Carbohydrate digestion and absorption,ssc05100:Bacterial invasion of epithelial cells,ssc05142:Chagas disease (American trypanosomiasis),ssc05146:Amoebiasis,ssc05160:Hepatitis C,ssc05161:Hepatitis B,ssc05162:Measles,ssc05164:Influenza A,ssc05166:HTLV-I infection,ssc05169:Epstein-Barr virus infection,ssc05200:Pathways in cancer,ssc05203:Viral carcinogenesis,ssc05205:Proteoglycans in cancer,ssc05210:Colorectal cancer,ssc05211:Renal cell carcinoma,ssc05212:Pancreatic cancer,ssc05213:Endometrial cancer,ssc05214:Glioma,ssc05215:Prostate cancer,ssc05218:Melanoma,ssc05220:Chronic myeloid leukemia,ssc05221:Acute myeloid leukemia,ssc05222:Small cell lung cancer,ssc05223:Non-small cell lung cancer,ssc05230:Central carbon metabolism in cancer,ssc05231:Choline metabolism in cancer, |
| ProxUt | DOWN | KDR          | kinase insert domain receptor(KDR)                                        | ssc04014:Ras signaling pathway,ssc04015:Rap1 signaling pathway,ssc04151:PI3K-Akt signaling pathway,ssc04370:VEGF signaling pathway,ssc04510:Focal adhesion,ssc05205:Proteoglycans in cancer,                                                                                                                                                                                                                                                                                                                                                                                                                                                                                                                                                                                                                                                                                                                                                                                                                                                                                                                                                                                                                                                                                                                                                                                                                                                                                                                                                                                                                                                                                                                                                                                                                                                                                                                                                                                                                                                                                                                                                                                                                                                                                                                                                                                                                                                                        |

|        |      |              |                                                               |                                                                                                                                                                                                                                                                                                                                                                                                                                                                                                                                                                                                                                                                                                                                                                                                                                                                                                                                                                                                                                                                                                                  |
|--------|------|--------------|---------------------------------------------------------------|------------------------------------------------------------------------------------------------------------------------------------------------------------------------------------------------------------------------------------------------------------------------------------------------------------------------------------------------------------------------------------------------------------------------------------------------------------------------------------------------------------------------------------------------------------------------------------------------------------------------------------------------------------------------------------------------------------------------------------------------------------------------------------------------------------------------------------------------------------------------------------------------------------------------------------------------------------------------------------------------------------------------------------------------------------------------------------------------------------------|
| ProxUt | DOWN | SIPA1L1      | signal induced proliferation associated 1 like 1(SIPA1L1)     | ssc04015:Rap1 signaling pathway,                                                                                                                                                                                                                                                                                                                                                                                                                                                                                                                                                                                                                                                                                                                                                                                                                                                                                                                                                                                                                                                                                 |
| ProxUt | DOWN | GNAI1        | G protein subunit alpha 1(GNAI1)                              | ssc04015:Rap1 signaling pathway,ssc04022:cGMP-PKG signaling pathway,ssc04024:cAMP signaling pathway,ssc04062:Chemokine signaling pathway,ssc04071:Sphingolipid signaling pathway,ssc04261:Adrenergic signaling in cardiomyocytes,ssc04360:Axon guidance,ssc04540:Gap junction,ssc04611:Platelet activation,ssc04670:Leukocyte transendothelial migration,ssc04713:Circadian entrainment,ssc04723:Retrograde endocannabinoid signaling,ssc04724:Glutamatergic synapse,ssc04725:Cholinergic synapse,ssc04726:Serotonergic synapse,ssc04727:GABAergic synapse,ssc04728:Dopaminergic synapse,ssc04730:Long-term depression,ssc04914:Progesterone-mediated oocyte maturation,ssc04915:Estrogen signaling pathway,ssc04916:Melanogenesis,ssc04921:Oxytocin signaling pathway,ssc04923:Regulation of lipolysis in adipocytes,ssc04924:Renin secretion,ssc04971:Gastric acid secretion,ssc05012:Parkinson's disease,ssc05030:Cocaine addiction,ssc05032:Morphine addiction,ssc05034:Alcoholism,ssc05133:Pertussis,ssc05142:Chagas disease (American trypanosomiasis),ssc05145:Toxoplasmosis,ssc05200:Pathways in cancer, |
| ProxUt | DOWN | AGTR1        | angiotensin II receptor type 1(AGTR1)                         | ssc04020:Calcium signaling pathway,ssc04022:cGMP-PKG signaling pathway,ssc04080:Neuroactive ligand-receptor interaction,ssc04261:Adrenergic signaling in cardiomyocytes,ssc04270:Vascular smooth muscle contraction,ssc04614:Renin-angiotensin system,ssc04924:Renin secretion,ssc04925:Aldosterone synthesis and secretion,ssc05200:Pathways in cancer,                                                                                                                                                                                                                                                                                                                                                                                                                                                                                                                                                                                                                                                                                                                                                         |
| ProxUt | DOWN | P2RX7        | purinergic receptor P2X 7(P2RX7)                              | ssc04020:Calcium signaling pathway,ssc04080:Neuroactive ligand-receptor interaction,                                                                                                                                                                                                                                                                                                                                                                                                                                                                                                                                                                                                                                                                                                                                                                                                                                                                                                                                                                                                                             |
| ProxUt | DOWN | CREB3L1      | cAMP responsive element binding protein 3 like 1(CREB3L1)     | ssc04022:cGMP-PKG signaling pathway,ssc04024:cAMP signaling pathway,ssc04151:PI3K-Akt signaling pathway,ssc04152:AMPK signaling pathway,ssc04261:Adrenergic signaling in cardiomyocytes,ssc04668:TNF signaling pathway,ssc04725:Cholinergic synapse,ssc04728:Dopaminergic synapse,ssc04911:Insulin secretion,ssc04915:Estrogen signaling pathway,ssc04916:Melanogenesis,ssc04918:Thyroid hormone synthesis,ssc04922:Glucagon signaling pathway,ssc04925:Aldosterone synthesis and secretion,ssc04931:Insulin resistance,ssc04962:Vasopressin-regulated water reabsorption,ssc05016:Huntington's disease,ssc05030:Cocaine addiction,ssc05031:Amphetamine addiction,ssc05034:Alcoholism,ssc05161:Hepatitis B,ssc05203:Viral carcinogenesis,ssc05215:Prostate cancer,                                                                                                                                                                                                                                                                                                                                               |
| ProxUt | DOWN | CREB3L2      | cAMP responsive element binding protein 3 like 2(CREB3L2)     | ssc04022:cGMP-PKG signaling pathway,ssc04024:cAMP signaling pathway,ssc04151:PI3K-Akt signaling pathway,ssc04152:AMPK signaling pathway,ssc04261:Adrenergic signaling in cardiomyocytes,ssc04668:TNF signaling pathway,ssc04725:Cholinergic synapse,ssc04728:Dopaminergic synapse,ssc04911:Insulin secretion,ssc04915:Estrogen signaling pathway,ssc04916:Melanogenesis,ssc04918:Thyroid hormone synthesis,ssc04922:Glucagon signaling pathway,ssc04925:Aldosterone synthesis and secretion,ssc04931:Insulin resistance,ssc04962:Vasopressin-regulated water reabsorption,ssc05016:Huntington's disease,ssc05030:Cocaine addiction,ssc05031:Amphetamine addiction,ssc05034:Alcoholism,ssc05161:Hepatitis B,ssc05203:Viral carcinogenesis,ssc05215:Prostate cancer,                                                                                                                                                                                                                                                                                                                                               |
| ProxUt | DOWN | ACKR3        | atypical chemokine receptor 3(ACKR3)                          | ssc04060:Cytokine-cytokine receptor interaction,                                                                                                                                                                                                                                                                                                                                                                                                                                                                                                                                                                                                                                                                                                                                                                                                                                                                                                                                                                                                                                                                 |
| ProxUt | DOWN | STAT2        | signal transducer and activator of transcription 2(STAT2)     | ssc04062:Chemokine signaling pathway,ssc04380:Osteoclast differentiation,ssc04630:Jak-STAT signaling pathway,ssc05160:Hepatitis C,ssc05161:Hepatitis B,ssc05162:Measles,ssc05164:Influenza A,ssc05168:Herpes simplex infection,                                                                                                                                                                                                                                                                                                                                                                                                                                                                                                                                                                                                                                                                                                                                                                                                                                                                                  |
| ProxUt | DOWN | PLAU         | plasminogen activator, urokinase(PLAU)                        | ssc04064:NF-kappa B signaling pathway,ssc04610:Complement and coagulation cascades,ssc05202:Transcriptional misregulation in cancer,ssc05205:Proteoglycans in cancer,ssc05206:MicroRNAs in cancer,                                                                                                                                                                                                                                                                                                                                                                                                                                                                                                                                                                                                                                                                                                                                                                                                                                                                                                               |
| ProxUt | DOWN | IRAK4        | interleukin 1 receptor associated kinase 4(IRAK4)             | ssc04064:NF-kappa B signaling pathway,ssc04620:Toll-like receptor signaling pathway,ssc04722:Neurotrophin signaling pathway,ssc05133:Pertussis,ssc05140:Leishmaniasis,ssc05142:Chagas disease (American trypanosomiasis),ssc05145:Toxoplasmosis,ssc05152:Tuberculosis,ssc05162:Measles,ssc05164:Influenza A,                                                                                                                                                                                                                                                                                                                                                                                                                                                                                                                                                                                                                                                                                                                                                                                                     |
| ProxUt | DOWN | PMAIP1       | phorbol-12-myristate-13-acetate-induced protein 1(PMAIP1)     | ssc04115:p53 signaling pathway,ssc05203:Viral carcinogenesis, \                                                                                                                                                                                                                                                                                                                                                                                                                                                                                                                                                                                                                                                                                                                                                                                                                                                                                                                                                                                                                                                  |
| ProxUt | DOWN | SEC22B       | SEC22 homolog B, vesicle trafficking protein(SEC22B)          | ssc04130:SNARE interactions in vesicular transport,ssc04145:Phagosome,ssc05134:Legionellosis,                                                                                                                                                                                                                                                                                                                                                                                                                                                                                                                                                                                                                                                                                                                                                                                                                                                                                                                                                                                                                    |
| ProxUt | DOWN | SEC23A       | Sec23 homolog A, coat complex II component(SEC23A)            | ssc04141:Protein processing in endoplasmic reticulum,                                                                                                                                                                                                                                                                                                                                                                                                                                                                                                                                                                                                                                                                                                                                                                                                                                                                                                                                                                                                                                                            |
| ProxUt | DOWN | ERLEC1       | endoplasmic reticulum lectin 1(ERLEC1)                        | ssc04141:Protein processing in endoplasmic reticulum,                                                                                                                                                                                                                                                                                                                                                                                                                                                                                                                                                                                                                                                                                                                                                                                                                                                                                                                                                                                                                                                            |
| ProxUt | DOWN | LMAN2        | lectin, mannose binding 2(LMAN2)                              | ssc04141:Protein processing in endoplasmic reticulum,                                                                                                                                                                                                                                                                                                                                                                                                                                                                                                                                                                                                                                                                                                                                                                                                                                                                                                                                                                                                                                                            |
| ProxUt | DOWN | TXNDC5       | thioredoxin domain containing 5(TXNDC5)                       | ssc04141:Protein processing in endoplasmic reticulum, \                                                                                                                                                                                                                                                                                                                                                                                                                                                                                                                                                                                                                                                                                                                                                                                                                                                                                                                                                                                                                                                          |
| ProxUt | DOWN | XBP1         | X-box binding protein 1(XBP1)                                 | ssc04141:Protein processing in endoplasmic reticulum,ssc04932:Non-alcoholic fatty liver disease (NAFLD),ssc05166:HTLV-1 infection,                                                                                                                                                                                                                                                                                                                                                                                                                                                                                                                                                                                                                                                                                                                                                                                                                                                                                                                                                                               |
| ProxUt | DOWN | MRC2         | mannose receptor C type 2(MRC2)                               | ssc04145:Phagosome,ssc05152:Tuberculosis,                                                                                                                                                                                                                                                                                                                                                                                                                                                                                                                                                                                                                                                                                                                                                                                                                                                                                                                                                                                                                                                                        |
| ProxUt | DOWN | COL1A2       | collagen type I alpha 2 chain(COL1A2)                         | ssc04151:PI3K-Akt signaling pathway,ssc04510:Focal adhesion,ssc04512:ECM-receptor interaction,ssc04611:Platelet activation,ssc04974:Protein digestion and absorption,ssc05146:Amoebiasis,                                                                                                                                                                                                                                                                                                                                                                                                                                                                                                                                                                                                                                                                                                                                                                                                                                                                                                                        |
| ProxUt | DOWN | COL3A1       | collagen type III alpha 1 chain(COL3A1)                       | ssc04151:PI3K-Akt signaling pathway,ssc04510:Focal adhesion,ssc04512:ECM-receptor interaction,ssc04611:Platelet activation,ssc04974:Protein digestion and absorption,ssc05146:Amoebiasis,                                                                                                                                                                                                                                                                                                                                                                                                                                                                                                                                                                                                                                                                                                                                                                                                                                                                                                                        |
| ProxUt | DOWN | TCF7L2       | transcription factor 7 like 2(TCF7L2)                         | ssc04310:Wnt signaling pathway,ssc04390:Hippo signaling pathway,ssc04520:Adherens junction,ssc04916:Melanogenesis,ssc05200:Pathways in cancer,ssc05210:Colorectal cancer,ssc05213:Endometrial cancer,ssc05215:Prostate cancer,ssc05216:Thyroid cancer,ssc05221:Acute myeloid leukemia,ssc05412:Arrhythmogenic right ventricular cardiomyopathy (ARVC),                                                                                                                                                                                                                                                                                                                                                                                                                                                                                                                                                                                                                                                                                                                                                           |
| ProxUt | DOWN | WNT2         | Wnt family member 2(WNT2)                                     | ssc04310:Wnt signaling pathway,ssc04390:Hippo signaling pathway,ssc04520:Adherens junction,ssc04916:Melanogenesis,ssc05200:Pathways in cancer,ssc05210:Colorectal cancer,ssc05213:Endometrial cancer,ssc05215:Prostate cancer,ssc05216:Thyroid cancer,ssc05221:Acute myeloid leukemia,ssc05412:Arrhythmogenic right ventricular cardiomyopathy (ARVC),                                                                                                                                                                                                                                                                                                                                                                                                                                                                                                                                                                                                                                                                                                                                                           |
| ProxUt | DOWN | EPHA4        | EPH receptor A4(EPHA4)                                        | ssc04360:Axon guidance,                                                                                                                                                                                                                                                                                                                                                                                                                                                                                                                                                                                                                                                                                                                                                                                                                                                                                                                                                                                                                                                                                          |
| ProxUt | DOWN | ROBO2        | roundabout guidance receptor 2(ROBO2)                         | ssc04360:Axon guidance, \                                                                                                                                                                                                                                                                                                                                                                                                                                                                                                                                                                                                                                                                                                                                                                                                                                                                                                                                                                                                                                                                                        |
| ProxUt | DOWN | SNAI2        | snail homolog 2 (Drosophila)(SNAI2)                           | ssc04390:Hippo signaling pathway,ssc04520:Adherens junction,                                                                                                                                                                                                                                                                                                                                                                                                                                                                                                                                                                                                                                                                                                                                                                                                                                                                                                                                                                                                                                                     |
| ProxUt | DOWN | SDC4         | syndecan 4(SDC4)                                              | ssc04512:ECM-receptor interaction,ssc04514:Cell adhesion molecules (CAMs),ssc05205:Proteoglycans in cancer,                                                                                                                                                                                                                                                                                                                                                                                                                                                                                                                                                                                                                                                                                                                                                                                                                                                                                                                                                                                                      |
| ProxUt | DOWN | SELL         | selectin L(SELL)                                              | ssc04514:Cell adhesion molecules (CAMs),                                                                                                                                                                                                                                                                                                                                                                                                                                                                                                                                                                                                                                                                                                                                                                                                                                                                                                                                                                                                                                                                         |
| ProxUt | DOWN | VCAN         | versican(VCAN)                                                | ssc04514:Cell adhesion molecules (CAMs),                                                                                                                                                                                                                                                                                                                                                                                                                                                                                                                                                                                                                                                                                                                                                                                                                                                                                                                                                                                                                                                                         |
| ProxUt | DOWN | LOC100737681 | contactin-associated protein-like 2(LOC100737681)             | ssc04514:Cell adhesion molecules (CAMs), \                                                                                                                                                                                                                                                                                                                                                                                                                                                                                                                                                                                                                                                                                                                                                                                                                                                                                                                                                                                                                                                                       |
| ProxUt | DOWN | CLDN11       | claudin 11(CLDN11)                                            | ssc04514:Cell adhesion molecules (CAMs),ssc04530:Tight junction,ssc04670:Leukocyte transendothelial migration,ssc05160:Hepatitis C,                                                                                                                                                                                                                                                                                                                                                                                                                                                                                                                                                                                                                                                                                                                                                                                                                                                                                                                                                                              |
| ProxUt | DOWN | SDC2         | syndecan 2(SDC2)                                              | ssc04514:Cell adhesion molecules (CAMs),ssc05144:Malaria,ssc05205:Proteoglycans in cancer,                                                                                                                                                                                                                                                                                                                                                                                                                                                                                                                                                                                                                                                                                                                                                                                                                                                                                                                                                                                                                       |
| ProxUt | DOWN | PTPN1        | protein tyrosine phosphatase, non-receptor type 1(PTPN1)      | ssc04520:Adherens junction,ssc04910:Insulin signaling pathway,ssc04931:Insulin resistance,                                                                                                                                                                                                                                                                                                                                                                                                                                                                                                                                                                                                                                                                                                                                                                                                                                                                                                                                                                                                                       |
| ProxUt | DOWN | GJA1         | gap junction protein alpha 1(GJA1)                            | ssc04540:Gap junction,ssc05412:Arrhythmogenic right ventricular cardiomyopathy (ARVC),                                                                                                                                                                                                                                                                                                                                                                                                                                                                                                                                                                                                                                                                                                                                                                                                                                                                                                                                                                                                                           |
| ProxUt | DOWN | PLAUR        | plasminogen activator, urokinase receptor(PLAUR)              | ssc04610:Complement and coagulation cascades,ssc05205:Proteoglycans in cancer,                                                                                                                                                                                                                                                                                                                                                                                                                                                                                                                                                                                                                                                                                                                                                                                                                                                                                                                                                                                                                                   |
| ProxUt | DOWN | ENPEP        | glutamyl aminopeptidase(ENPEP)                                | ssc04614:Renin-angiotensin system,                                                                                                                                                                                                                                                                                                                                                                                                                                                                                                                                                                                                                                                                                                                                                                                                                                                                                                                                                                                                                                                                               |
| ProxUt | DOWN | MARCKS       | myristoylated alanine rich protein kinase C substrate(MARCKS) | ssc04666:Fc gamma R-mediated phagocytosis,ssc05206:MicroRNAs in cancer, \                                                                                                                                                                                                                                                                                                                                                                                                                                                                                                                                                                                                                                                                                                                                                                                                                                                                                                                                                                                                                                        |
| ProxUt | DOWN | NSF          | N-ethylmaleimide sensitive factor, vesicle fusing ATPase(NSF) | ssc04721:Synaptic vesicle cycle,ssc04727:GABAergic synapse,ssc04962:Vasopressin-regulated water reabsorption,                                                                                                                                                                                                                                                                                                                                                                                                                                                                                                                                                                                                                                                                                                                                                                                                                                                                                                                                                                                                    |
| ProxUt | DOWN | MAGED1       | MAGE family member D1(MAGED1)                                 | ssc04722:Neurotrophin signaling pathway,                                                                                                                                                                                                                                                                                                                                                                                                                                                                                                                                                                                                                                                                                                                                                                                                                                                                                                                                                                                                                                                                         |
| ProxUt | DOWN | SLC38A2      | solute carrier family 38 member 2(SLC38A2)                    | ssc04724:Glutamatergic synapse,ssc04727:GABAergic synapse,ssc04974:Protein digestion and absorption,                                                                                                                                                                                                                                                                                                                                                                                                                                                                                                                                                                                                                                                                                                                                                                                                                                                                                                                                                                                                             |

|        |      |              |                                                               |                                                                                                                                                                                                                                                                                                                                                                                                                                                                                                                                                                                                                                                                                                                                                                                                                                                                                                                                                                                                                                                                                                                                                                                                                                                                                                                                                                                                                                                                                             |
|--------|------|--------------|---------------------------------------------------------------|---------------------------------------------------------------------------------------------------------------------------------------------------------------------------------------------------------------------------------------------------------------------------------------------------------------------------------------------------------------------------------------------------------------------------------------------------------------------------------------------------------------------------------------------------------------------------------------------------------------------------------------------------------------------------------------------------------------------------------------------------------------------------------------------------------------------------------------------------------------------------------------------------------------------------------------------------------------------------------------------------------------------------------------------------------------------------------------------------------------------------------------------------------------------------------------------------------------------------------------------------------------------------------------------------------------------------------------------------------------------------------------------------------------------------------------------------------------------------------------------|
| ProxUt | DOWN | SLC12A2      | solute carrier family 12 member 2(SLC12A2)                    | ssc04970:Salivary secretion,ssc04972:Pancreatic secretion,                                                                                                                                                                                                                                                                                                                                                                                                                                                                                                                                                                                                                                                                                                                                                                                                                                                                                                                                                                                                                                                                                                                                                                                                                                                                                                                                                                                                                                  |
| ProxUt | DOWN | COL7A1       | collagen type VII alpha 1 chain(COL7A1)                       | ssc04974:Protein digestion and absorption,                                                                                                                                                                                                                                                                                                                                                                                                                                                                                                                                                                                                                                                                                                                                                                                                                                                                                                                                                                                                                                                                                                                                                                                                                                                                                                                                                                                                                                                  |
| ProxUt | DOWN | LOC100512644 | uncharacterized LOC100512644(LOC100512644)                    | ssc04974:Protein digestion and absorption, \                                                                                                                                                                                                                                                                                                                                                                                                                                                                                                                                                                                                                                                                                                                                                                                                                                                                                                                                                                                                                                                                                                                                                                                                                                                                                                                                                                                                                                                |
| ProxUt | DOWN | NCEH1        | neutral cholesterol ester hydrolase 1(NCEH1)                  | ssc04976:BILE secretion,                                                                                                                                                                                                                                                                                                                                                                                                                                                                                                                                                                                                                                                                                                                                                                                                                                                                                                                                                                                                                                                                                                                                                                                                                                                                                                                                                                                                                                                                    |
| ProxUt | DOWN | STEAP2       | STEAP2 metalloredutase(STEAP2)                                | ssc04978:Mineral absorption,                                                                                                                                                                                                                                                                                                                                                                                                                                                                                                                                                                                                                                                                                                                                                                                                                                                                                                                                                                                                                                                                                                                                                                                                                                                                                                                                                                                                                                                                |
| ProxUt | DOWN | RARA         | retinoic acid receptor alpha(RARA)                            | ssc05200:Pathways in cancer,ssc05202:Transcriptional misregulation in cancer,ssc05221:Acute myeloid leukemia,                                                                                                                                                                                                                                                                                                                                                                                                                                                                                                                                                                                                                                                                                                                                                                                                                                                                                                                                                                                                                                                                                                                                                                                                                                                                                                                                                                               |
| ProxUt | DOWN | EPAS1        | endothelial PAS domain protein 1(EPAS1)                       | ssc05200:Pathways in cancer,ssc05211:Renal cell carcinoma,                                                                                                                                                                                                                                                                                                                                                                                                                                                                                                                                                                                                                                                                                                                                                                                                                                                                                                                                                                                                                                                                                                                                                                                                                                                                                                                                                                                                                                  |
| ProxUt | DOWN | LUM          | lumican(LUM)                                                  | ssc05205:Proteoglycans in cancer,                                                                                                                                                                                                                                                                                                                                                                                                                                                                                                                                                                                                                                                                                                                                                                                                                                                                                                                                                                                                                                                                                                                                                                                                                                                                                                                                                                                                                                                           |
| UTJ    | UP   | ALDH2        | aldehyde dehydrogenase 2 family (mitochondrial)(ALDH2)        | ssc00010:Glycolysis / Gluconeogenesis,ssc00053:Ascorbate and aldarate metabolism,ssc00071:Fatty acid degradation,ssc00280:Valine, leucine and isoleucine degradation,ssc00310:Lysine degradation,ssc00330:Arginine and proline metabolism,ssc00340:Histidine metabolism,ssc00380:Tryptophan metabolism,ssc00410:beta-Alanine metabolism,ssc00561:Glycerolipid metabolism,ssc00620:Pyruvate metabolism,ssc01100:Metabolic pathways,ssc01130:Biosynthesis of antibiotics,                                                                                                                                                                                                                                                                                                                                                                                                                                                                                                                                                                                                                                                                                                                                                                                                                                                                                                                                                                                                                     |
| UTJ    | UP   | CHDH         | choline dehydrogenase(CHDH)                                   | ssc00260:Glycine, serine and threonine metabolism,ssc01100:Metabolic pathways,                                                                                                                                                                                                                                                                                                                                                                                                                                                                                                                                                                                                                                                                                                                                                                                                                                                                                                                                                                                                                                                                                                                                                                                                                                                                                                                                                                                                              |
| UTJ    | UP   | MTR          | 5-methyltetrahydrofolate-homocysteine methyltransferase(MTR)  | ssc00270:Cysteine and methionine metabolism,ssc00450:Selenocompound metabolism,ssc00670:One carbon pool by folate,ssc01100:Metabolic pathways,ssc01230:Biosynthesis of amino acids,                                                                                                                                                                                                                                                                                                                                                                                                                                                                                                                                                                                                                                                                                                                                                                                                                                                                                                                                                                                                                                                                                                                                                                                                                                                                                                         |
| UTJ    | UP   | RENBP        | renin binding protein(RENBP)                                  | ssc00520:Amino sugar and nucleotide sugar metabolism,                                                                                                                                                                                                                                                                                                                                                                                                                                                                                                                                                                                                                                                                                                                                                                                                                                                                                                                                                                                                                                                                                                                                                                                                                                                                                                                                                                                                                                       |
| UTJ    | UP   | UAP1         | UDP-N-acetylglucosamine pyrophosphorylase 1(UAP1)             | ssc00520:Amino sugar and nucleotide sugar metabolism,ssc01100:Metabolic pathways,ssc01130:Biosynthesis of antibiotics,                                                                                                                                                                                                                                                                                                                                                                                                                                                                                                                                                                                                                                                                                                                                                                                                                                                                                                                                                                                                                                                                                                                                                                                                                                                                                                                                                                      |
| UTJ    | UP   | CHKA         | choline kinase alpha(CHKA)                                    | ssc00564:Glycerophospholipid metabolism,ssc01100:Metabolic pathways,ssc05231:Choline metabolism in cancer,                                                                                                                                                                                                                                                                                                                                                                                                                                                                                                                                                                                                                                                                                                                                                                                                                                                                                                                                                                                                                                                                                                                                                                                                                                                                                                                                                                                  |
| UTJ    | UP   | RDH10        | retinol dehydrogenase 10 (all-trans)(RDH10)                   | ssc00830:Retinol metabolism,ssc01100:Metabolic pathways, \                                                                                                                                                                                                                                                                                                                                                                                                                                                                                                                                                                                                                                                                                                                                                                                                                                                                                                                                                                                                                                                                                                                                                                                                                                                                                                                                                                                                                                  |
| UTJ    | UP   | CA9          | carbonic anhydrase 9(CA9)                                     | ssc00910:Nitrogen metabolism,                                                                                                                                                                                                                                                                                                                                                                                                                                                                                                                                                                                                                                                                                                                                                                                                                                                                                                                                                                                                                                                                                                                                                                                                                                                                                                                                                                                                                                                               |
| UTJ    | UP   | MAPK10       | mitogen-activated protein kinase 10(MAPK10)                   | ssc04010:MAPK signaling pathway,ssc04012:ErbB signaling pathway,ssc04014:Ras signaling pathway,ssc04024:cAMP signaling pathway,ssc04068:FoxO signaling pathway,ssc04071:Sphingolipid signaling pathway,ssc04141:Protein processing in endoplasmic reticulum,ssc04310:Wnt signaling pathway,ssc04380:Osteoclast differentiation,ssc04510:Focal adhesion,ssc04620:Toll-like receptor signaling pathway,ssc04621:NOD-like receptor signaling pathway,ssc04622:RIG-I-like receptor signaling pathway,ssc04664:Fc epsilon RI signaling pathway,ssc04668:TNF signaling pathway,ssc04722:Neurotrophin signaling pathway,ssc04723:Retrograde endocannabinoid signaling,ssc04728:Dopaminergic synapse,ssc04750:Inflammatory mediator regulation of TRP channels,ssc04910:Insulin signaling pathway,ssc04912:GnRH signaling pathway,ssc04914:Progesterone-mediated oocyte maturation,ssc04917:Prolactin signaling pathway,ssc04920:Adipocytokine signaling pathway,ssc04930:Type II diabetes mellitus,ssc04931:Insulin resistance,ssc04932:Non-alcoholic fatty liver disease (NAFLD),ssc05132:Salmonella infection,ssc05133:Pertussis,ssc05142:Chagas disease (American trypanosomiasis),ssc05145:Toxoplasmosis,ssc05152:Tuberculosis,ssc05160:Hepatitis C,ssc05161:Hepatitis B,ssc05164:Influenza A,ssc05168:Herpes simplex infection,ssc05169:Epstein-Barr virus infection,ssc05200:Pathways in cancer,ssc05210:Colorectal cancer,ssc05212:Pancreatic cancer,ssc05231:Choline metabolism in cancer, |
| UTJ    | UP   | CACNA1D      | calcium voltage-gated channel subunit alpha 1 D(CACNA1D)      | ssc04010:MAPK signaling pathway,ssc04020:Calcium signaling pathway,ssc04022:cGMP-PKG signaling pathway,ssc04024:cAMP signaling pathway,ssc04260:Cardiac muscle contraction,ssc04261:Adrenergic signaling in cardiomyocytes,ssc04270:Vascular smooth muscle contraction,ssc04713:Circadian entrainment,ssc04723:Retrograde endocannabinoid signaling,ssc04724:Glutamatergic synapse,ssc04725:Cholinergic synapse,ssc04726:Serotonergic synapse,ssc04727:GABAergic synapse,ssc04728:Dopaminergic synapse,ssc04911:Insulin secretion,ssc04912:GnRH signaling pathway,ssc04921:Oxytocin signaling pathway,ssc04924:Renin secretion,ssc04925:Aldosterone synthesis and secretion,ssc04930:Type II diabetes mellitus,ssc04973:Carbohydrate digestion and absorption,ssc05010:Alzheimer's disease,ssc05031:Amphetamine addiction,ssc05410:Hypertrophic cardiomyopathy (HCM),ssc05412:Arrhythmic right ventricular cardiomyopathy (ARVC),ssc05414:Dilated cardiomyopathy, \                                                                                                                                                                                                                                                                                                                                                                                                                                                                                                                         |
| UTJ    | UP   | ARRB1        | arrestin beta 1(ARRB1)                                        | ssc04010:MAPK signaling pathway,ssc04062:Chemokine signaling pathway,ssc04144:Endocytosis,ssc05032:Morphine addiction,                                                                                                                                                                                                                                                                                                                                                                                                                                                                                                                                                                                                                                                                                                                                                                                                                                                                                                                                                                                                                                                                                                                                                                                                                                                                                                                                                                      |
| UTJ    | UP   | EP300        | E1A binding protein p300(EP300)                               | ssc04024:cAMP signaling pathway,ssc04066:HIF-1 signaling pathway,ssc04068:FoxO signaling pathway,ssc04110:Cell cycle,ssc04310:Wnt signaling pathway,ssc04330:Notch signaling pathway,ssc04350:TGF-beta signaling pathway,ssc04520:Adherens junction,ssc04630:Jak-STAT signaling pathway,ssc04720:Long-term potentiation,ssc04916:Melanogenesis,ssc04919:Thyroid hormone signaling pathway,ssc04922:Glucagon signaling pathway,ssc05016:Huntington's disease,ssc05152:Tuberculosis,ssc05161:Hepatitis B,ssc05164:Influenza A,ssc05166:HTLV-1 infection,ssc05168:Herpes simplex infection,ssc05200:Pathways in cancer,ssc05203:Viral carcinogenesis,ssc05206:MicroRNAs in cancer,ssc05211:Renal cell carcinoma,ssc05215:Prostate cancer,                                                                                                                                                                                                                                                                                                                                                                                                                                                                                                                                                                                                                                                                                                                                                      |
| UTJ    | UP   | CD27         | CD27 molecule(CD27)                                           | ssc04060:Cytokine-cytokine receptor interaction,                                                                                                                                                                                                                                                                                                                                                                                                                                                                                                                                                                                                                                                                                                                                                                                                                                                                                                                                                                                                                                                                                                                                                                                                                                                                                                                                                                                                                                            |
| UTJ    | UP   | JAK2         | Janus kinase 2(JAK2)                                          | ssc04062:Chemokine signaling pathway,ssc04151:PI3K-Akt signaling pathway,ssc04550:Signaling pathways regulating pluripotency of stem cells,ssc04630:Jak-STAT signaling pathway,ssc04725:Cholinergic synapse,ssc04917:Prolactin signaling pathway,ssc04920:Adipocytokine signaling pathway,ssc05140:Leishmaniasis,ssc05145:Toxoplasmosis,ssc05152:Tuberculosis,ssc05162:Measles,ssc05164:Influenza A,ssc05168:Herpes simplex infection,                                                                                                                                                                                                                                                                                                                                                                                                                                                                                                                                                                                                                                                                                                                                                                                                                                                                                                                                                                                                                                                      |
| UTJ    | UP   | ELMO1        | engulfment and cell motility 1(ELMO1)                         | ssc04062:Chemokine signaling pathway,ssc05100:Bacterial invasion of epithelial cells,                                                                                                                                                                                                                                                                                                                                                                                                                                                                                                                                                                                                                                                                                                                                                                                                                                                                                                                                                                                                                                                                                                                                                                                                                                                                                                                                                                                                       |
| UTJ    | UP   | CDC14A       | cell division cycle 14A(CDC14A)                               | ssc04110:Cell cycle,                                                                                                                                                                                                                                                                                                                                                                                                                                                                                                                                                                                                                                                                                                                                                                                                                                                                                                                                                                                                                                                                                                                                                                                                                                                                                                                                                                                                                                                                        |
| UTJ    | UP   | EP515        | epidermal growth factor receptor pathway substrate 15(EP515)  | ssc04144:Endocytosis,                                                                                                                                                                                                                                                                                                                                                                                                                                                                                                                                                                                                                                                                                                                                                                                                                                                                                                                                                                                                                                                                                                                                                                                                                                                                                                                                                                                                                                                                       |
| UTJ    | UP   | RAB11FIP1    | RAB11 family interacting protein 1(RAB11FIP1)                 | ssc04144:Endocytosis, \                                                                                                                                                                                                                                                                                                                                                                                                                                                                                                                                                                                                                                                                                                                                                                                                                                                                                                                                                                                                                                                                                                                                                                                                                                                                                                                                                                                                                                                                     |
| UTJ    | UP   | C1QC         | complement C1q C chain(C1QC)                                  | ssc04610:Complement and coagulation cascades,ssc05020:Prion diseases,ssc05133:Pertussis,ssc05142:Chagas disease (American trypanosomiasis),ssc05150:Staphylococcus aureus infection,ssc05322:Systemic lupus erythematosus,                                                                                                                                                                                                                                                                                                                                                                                                                                                                                                                                                                                                                                                                                                                                                                                                                                                                                                                                                                                                                                                                                                                                                                                                                                                                  |
| UTJ    | UP   | CAMK1D       | calcium/calmodulin dependent protein kinase ID(CAMK1D)        | ssc04921:Oxytocin signaling pathway,ssc04925:Aldosterone synthesis and secretion,                                                                                                                                                                                                                                                                                                                                                                                                                                                                                                                                                                                                                                                                                                                                                                                                                                                                                                                                                                                                                                                                                                                                                                                                                                                                                                                                                                                                           |
| UTJ    | UP   | HPGD         | hydroxyprostaglandin dehydrogenase 15-(NAD)(HPGD)             | ssc05202:Transcriptional misregulation in cancer, \                                                                                                                                                                                                                                                                                                                                                                                                                                                                                                                                                                                                                                                                                                                                                                                                                                                                                                                                                                                                                                                                                                                                                                                                                                                                                                                                                                                                                                         |
| UTJ    | DOWN | PGK1         | phosphoglycerate kinase 1(PGK1)                               | ssc00010:Glycolysis / Gluconeogenesis,ssc01100:Metabolic pathways,ssc01130:Biosynthesis of antibiotics,ssc01200:Carbon metabolism,ssc01230:Biosynthesis of amino acids,                                                                                                                                                                                                                                                                                                                                                                                                                                                                                                                                                                                                                                                                                                                                                                                                                                                                                                                                                                                                                                                                                                                                                                                                                                                                                                                     |
| UTJ    | DOWN | GAPDH        | glyceraldehyde-3-phosphate dehydrogenase(GAPDH)               | ssc00010:Glycolysis / Gluconeogenesis,ssc01100:Metabolic pathways,ssc01130:Biosynthesis of antibiotics,ssc01200:Carbon metabolism,ssc01230:Biosynthesis of amino acids,ssc04066:HIF-1 signaling pathway,ssc05010:Alzheimer's disease,                                                                                                                                                                                                                                                                                                                                                                                                                                                                                                                                                                                                                                                                                                                                                                                                                                                                                                                                                                                                                                                                                                                                                                                                                                                       |
| UTJ    | DOWN | B4GALT1      | beta-1,4-galactosyltransferase 1(B4GALT1)                     | ssc00052:Galactose metabolism,ssc00510:N-Glycan biosynthesis,ssc00514:Other types of O-glycan biosynthesis,ssc00533:Glycosaminoglycan biosynthesis - keratan sulfate,ssc00601:Glycosphingolipid biosynthesis - lacto and neolacto series,ssc01100:Metabolic pathways,                                                                                                                                                                                                                                                                                                                                                                                                                                                                                                                                                                                                                                                                                                                                                                                                                                                                                                                                                                                                                                                                                                                                                                                                                       |
| UTJ    | DOWN | HMGCS1       | 3-hydroxy-3-methylglutaryl-CoA synthase 1(HMGCS1)             | ssc00072:Synthesis and degradation of ketone bodies,ssc00280:Valine, leucine and isoleucine degradation,ssc00650:Butanoate metabolism,ssc00900:Terpenoid backbone biosynthesis,ssc01100:Metabolic pathways,ssc01130:Biosynthesis of antibiotics,                                                                                                                                                                                                                                                                                                                                                                                                                                                                                                                                                                                                                                                                                                                                                                                                                                                                                                                                                                                                                                                                                                                                                                                                                                            |
| UTJ    | DOWN | CYP51        | cytochrome P450, family 51, subfamily A, polypeptide 1(CYP51) | ssc00100:Steroid biosynthesis,ssc01100:Metabolic pathways,ssc01130:Biosynthesis of antibiotics,                                                                                                                                                                                                                                                                                                                                                                                                                                                                                                                                                                                                                                                                                                                                                                                                                                                                                                                                                                                                                                                                                                                                                                                                                                                                                                                                                                                             |

|     |      |              |                                                                                                |                                                                                                                                                                                                                                                                                                                                                                                                                                                                                                                                                                                                                                                                                                                                                                                                                                                                                                                                                                                                                                                                                                                                                     |
|-----|------|--------------|------------------------------------------------------------------------------------------------|-----------------------------------------------------------------------------------------------------------------------------------------------------------------------------------------------------------------------------------------------------------------------------------------------------------------------------------------------------------------------------------------------------------------------------------------------------------------------------------------------------------------------------------------------------------------------------------------------------------------------------------------------------------------------------------------------------------------------------------------------------------------------------------------------------------------------------------------------------------------------------------------------------------------------------------------------------------------------------------------------------------------------------------------------------------------------------------------------------------------------------------------------------|
| UTJ | DOWN | SOLE         | squalene epoxidase(SOLE)                                                                       | ssc00100: Steroid biosynthesis, ssc01100: Metabolic pathways, ssc01130: Biosynthesis of antibiotics,                                                                                                                                                                                                                                                                                                                                                                                                                                                                                                                                                                                                                                                                                                                                                                                                                                                                                                                                                                                                                                                |
| UTJ | DOWN | NPR2         | natriuretic peptide receptor B/guanylate cyclase B (atrionatriuretic peptide receptor B)(NPR2) | ssc00230: Purine metabolism, ssc04022: cGMP-PKG signaling pathway, ssc04270: Vascular smooth muscle contraction, ssc04921: Oxytocin signaling pathway,                                                                                                                                                                                                                                                                                                                                                                                                                                                                                                                                                                                                                                                                                                                                                                                                                                                                                                                                                                                              |
| UTJ | DOWN | ALDH18A1     | aldehyde dehydrogenase 18 family member A1(ALDH18A1)                                           | ssc00330: Arginine and proline metabolism, ssc01100: Metabolic pathways, ssc01230: Biosynthesis of amino acids,                                                                                                                                                                                                                                                                                                                                                                                                                                                                                                                                                                                                                                                                                                                                                                                                                                                                                                                                                                                                                                     |
| UTJ | DOWN | REXO2        | RNA exonuclease 2(REXO2)                                                                       | ssc03008: Ribosome biogenesis in eukaryotes, \                                                                                                                                                                                                                                                                                                                                                                                                                                                                                                                                                                                                                                                                                                                                                                                                                                                                                                                                                                                                                                                                                                      |
| UTJ | DOWN | SEC61G       | Sec61 translocon gamma subunit(SEC61G)                                                         | ssc03060: Protein export, ssc04141: Protein processing in endoplasmic reticulum, ssc04145: Phagosome,                                                                                                                                                                                                                                                                                                                                                                                                                                                                                                                                                                                                                                                                                                                                                                                                                                                                                                                                                                                                                                               |
| UTJ | DOWN | CALM2        | calmodulin 2(CALM2)                                                                            | ssc04014: Ras signaling pathway, ssc04015: Rap1 signaling pathway, ssc04020: Calcium signaling pathway, ssc04022: cGMP-PKG signaling pathway, ssc04024: cAMP signaling pathway, ssc04070: Phosphatidylinositol signaling system, ssc04114: Oocyte meiosis, ssc04261: Adrenergic signaling in cardiomyocytes, ssc04270: Vascular smooth muscle contraction, ssc04713: Circadian entrainment, ssc04720: Long-term potentiation, ssc04722: Neurotrophin signaling pathway, ssc04728: Dopaminergic synapse, ssc04740: Olfactory transduction, ssc04744: Phototransduction, ssc04750: Inflammatory mediator regulation of TRP channels, ssc04910: Insulin signaling pathway, ssc04912: GnRH signaling pathway, ssc04915: Estrogen signaling pathway, ssc04916: Melanogenesis, ssc04921: Oxytocin signaling pathway, ssc04922: Glucagon signaling pathway, ssc04924: Renin secretion, ssc04925: Aldosterone synthesis and secretion, ssc04970: Salivary secretion, ssc04971: Gastric acid secretion, ssc05010: Alzheimer's disease, ssc05031: Amphetamine addiction, ssc05034: Alcoholism, ssc05133: Pertussis, ssc05152: Tuberculosis, ssc05214: Glioma, |
| UTJ | DOWN | GNG2         | G protein subunit gamma 2(GNG2)                                                                | ssc04014: Ras signaling pathway, ssc04062: Chemokine signaling pathway, ssc04151: PI3K-Akt signaling pathway, ssc04713: Circadian entrainment, ssc04723: Retrograde endocannabinoid signaling, ssc04724: Glutamatergic synapse, ssc04725: Cholinergic synapse, ssc04726: Serotonergic synapse, ssc04727: GABAergic synapse, ssc04728: Dopaminergic synapse, ssc05032: Morphine addiction, ssc05034: Alcoholism, ssc05200: Pathways in cancer,                                                                                                                                                                                                                                                                                                                                                                                                                                                                                                                                                                                                                                                                                                       |
| UTJ | DOWN | CREB3L2      | cAMP responsive element binding protein 3 like 2(CREB3L2)                                      | ssc04022: cGMP-PKG signaling pathway, ssc04024: cAMP signaling pathway, ssc04151: PI3K-Akt signaling pathway, ssc04152: AMPK signaling pathway, ssc04261: Adrenergic signaling in cardiomyocytes, ssc04668: TNF signaling pathway, ssc04725: Cholinergic synapse, ssc04728: Dopaminergic synapse, ssc04911: Insulin secretion, ssc04915: Estrogen signaling pathway, ssc04916: Melanogenesis, ssc04918: Thyroid hormone synthesis, ssc04922: Glucagon signaling pathway, ssc04925: Aldosterone synthesis and secretion, ssc04931: Insulin resistance, ssc04962: Vasopressin-regulated water reabsorption, ssc05016: Huntington's disease, ssc05030: Cocaine addiction, ssc05031: Amphetamine addiction, ssc05034: Alcoholism, ssc05161: Hepatitis B, ssc05203: Viral carcinogenesis, ssc05215: Prostate cancer,                                                                                                                                                                                                                                                                                                                                     |
| UTJ | DOWN | ACKR3        | atypical chemokine receptor 3(ACKR3)                                                           | ssc04060: Cytokine-cytokine receptor interaction,                                                                                                                                                                                                                                                                                                                                                                                                                                                                                                                                                                                                                                                                                                                                                                                                                                                                                                                                                                                                                                                                                                   |
| UTJ | DOWN | SEC23A       | Sec23 homolog A, coat complex II component(SEC23A)                                             | ssc04141: Protein processing in endoplasmic reticulum,                                                                                                                                                                                                                                                                                                                                                                                                                                                                                                                                                                                                                                                                                                                                                                                                                                                                                                                                                                                                                                                                                              |
| UTJ | DOWN | CD63         | CD63 molecule(CD63)                                                                            | ssc04142: Lysosome, ssc05205: Proteoglycans in cancer,                                                                                                                                                                                                                                                                                                                                                                                                                                                                                                                                                                                                                                                                                                                                                                                                                                                                                                                                                                                                                                                                                              |
| UTJ | DOWN | COL1A2       | collagen type I alpha 2 chain(COL1A2)                                                          | ssc04151: PI3K-Akt signaling pathway, ssc04510: Focal adhesion, ssc04512: ECM-receptor interaction, ssc04611: Platelet activation, ssc04974: Protein digestion and absorption, ssc05146: Amoebiasis,                                                                                                                                                                                                                                                                                                                                                                                                                                                                                                                                                                                                                                                                                                                                                                                                                                                                                                                                                |
| UTJ | DOWN | LOC100524585 | ephrin type-B receptor 1(LOC100524585)                                                         | ssc04360: Axon guidance, \                                                                                                                                                                                                                                                                                                                                                                                                                                                                                                                                                                                                                                                                                                                                                                                                                                                                                                                                                                                                                                                                                                                          |
| UTJ | DOWN | CD276        | CD276 molecule(CD276)                                                                          | ssc04514: Cell adhesion molecules (CAMs),                                                                                                                                                                                                                                                                                                                                                                                                                                                                                                                                                                                                                                                                                                                                                                                                                                                                                                                                                                                                                                                                                                           |
| UTJ | DOWN | VCAN         | versican(VCAN)                                                                                 | ssc04514: Cell adhesion molecules (CAMs),                                                                                                                                                                                                                                                                                                                                                                                                                                                                                                                                                                                                                                                                                                                                                                                                                                                                                                                                                                                                                                                                                                           |
| UTJ | DOWN | PLAUR        | plasminogen activator, urokinase receptor(PLAUR)                                               | ssc04610: Complement and coagulation cascades, ssc05205: Proteoglycans in cancer,                                                                                                                                                                                                                                                                                                                                                                                                                                                                                                                                                                                                                                                                                                                                                                                                                                                                                                                                                                                                                                                                   |
| UTJ | DOWN | MAGED1       | MAGE family member D1(MAGED1)                                                                  | ssc04722: Neurotrophin signaling pathway,                                                                                                                                                                                                                                                                                                                                                                                                                                                                                                                                                                                                                                                                                                                                                                                                                                                                                                                                                                                                                                                                                                           |
| UTJ | DOWN | EEF1G        | eukaryotic translation elongation factor 1 gamma(EEF1G)                                        | ssc05134: Legionellosis,                                                                                                                                                                                                                                                                                                                                                                                                                                                                                                                                                                                                                                                                                                                                                                                                                                                                                                                                                                                                                                                                                                                            |



**Table 6.** List of pathways classified according to biological processes (**DAVID database**,  $P < 0.05$ ) of differentially-expressed genes (DEGs, ID and name), solely related to copulation, in pig uterine mucosae (endocervix (Cvx), endometrium (distal: D-Endom or proximal: P-Endom) and utero-tubal junction (UTJ)), up- or down-regulated.

| Tissue | Regulation | ID           | Gene Name                                                                   | GOTERM_BP_DIRECT                                                                                                                                                                                                                                                                                                                                                                                                                                                                                                                                                                                                                                                                                                                                                                                                                                                                                                                                                                                 |
|--------|------------|--------------|-----------------------------------------------------------------------------|--------------------------------------------------------------------------------------------------------------------------------------------------------------------------------------------------------------------------------------------------------------------------------------------------------------------------------------------------------------------------------------------------------------------------------------------------------------------------------------------------------------------------------------------------------------------------------------------------------------------------------------------------------------------------------------------------------------------------------------------------------------------------------------------------------------------------------------------------------------------------------------------------------------------------------------------------------------------------------------------------|
| Cvx    | UP         | NCOR2        | nuclear receptor corepressor 2(NCOR2)                                       | GO:000122-negative regulation of transcription from RNA polymerase II promoter,                                                                                                                                                                                                                                                                                                                                                                                                                                                                                                                                                                                                                                                                                                                                                                                                                                                                                                                  |
| Cvx    | UP         | TSHZ2        | teashirt zinc finger homeobox 2(TSHZ2)                                      | GO:000122-negative regulation of transcription from RNA polymerase II promoter,GO:006351-transcription, DNA-templated,GO:006357-regulation of transcription from RNA polymerase II promoter,GO:0007275-multicellular organism development,GO:0010468-regulation of gene expression,                                                                                                                                                                                                                                                                                                                                                                                                                                                                                                                                                                                                                                                                                                              |
| Cvx    | UP         | FUNDC2       | FUN14 domain containing 2(FUNDC2)                                           | GO:000422-mitophagy,                                                                                                                                                                                                                                                                                                                                                                                                                                                                                                                                                                                                                                                                                                                                                                                                                                                                                                                                                                             |
| Cvx    | UP         | FAM107A      | family with sequence similarity 107 member A(FAM107A)                       | GO:001558-regulation of cell growth,                                                                                                                                                                                                                                                                                                                                                                                                                                                                                                                                                                                                                                                                                                                                                                                                                                                                                                                                                             |
| Cvx    | UP         | PYGO1        | pygopus family PHD finger 1(PYGO1)                                          | GO:001822-kidney development,GO:0002244-hematopoietic progenitor cell differentiation,GO:0007289-spermatid nucleus differentiation,GO:0009791-post-embryonic development,GO:0016055-Wnt signaling pathway,GO:0034504-protein localization to nucleus,GO:0045944-positive regulation of transcription from RNA polymerase II promoter,                                                                                                                                                                                                                                                                                                                                                                                                                                                                                                                                                                                                                                                            |
| Cvx    | UP         | TMEM141      | transmembrane protein 141(TMEM141)                                          | GO:0003341-cilium movement,GO:0036158-outer dynein arm assembly,                                                                                                                                                                                                                                                                                                                                                                                                                                                                                                                                                                                                                                                                                                                                                                                                                                                                                                                                 |
| Cvx    | UP         | THBS3        | thrombospondin 3(THBS3)                                                     | GO:0003417-growth plate cartilage development,GO:0007155-cell adhesion,GO:0043931-ossification involved in bone maturation,GO:0060346-bone trabecula formation,                                                                                                                                                                                                                                                                                                                                                                                                                                                                                                                                                                                                                                                                                                                                                                                                                                  |
| Cvx    | UP         | FMO1         | flavin containing monooxygenase 1(FMO1)                                     | GO:006082-organic acid metabolic process,GO:0009404-toxin metabolic process,GO:0017144-drug metabolic process,GO:0070995-NADPH oxidation,                                                                                                                                                                                                                                                                                                                                                                                                                                                                                                                                                                                                                                                                                                                                                                                                                                                        |
| Cvx    | UP         | LOC100520903 | zinc finger protein 300-like(LOC100520903)                                  | GO:006355-regulation of transcription, DNA-templated,                                                                                                                                                                                                                                                                                                                                                                                                                                                                                                                                                                                                                                                                                                                                                                                                                                                                                                                                            |
| Cvx    | UP         | PRKCCQ       | protein kinase C theta(PRKCCQ)                                              | GO:0006509-membrane protein ectodomain proteolysis,GO:0018105-peptidyl-serine phosphorylation,GO:0032212-positive regulation of telomere maintenance via telomerase,GO:0032740-positive regulation of interleukin-17 production,GO:0032753-positive regulation of interleukin-4 production,GO:0035556-intracellular signal transduction,GO:0042102-positive regulation of T cell proliferation,GO:0045086-positive regulation of interleukin-2 biosynthetic process,GO:0046627-negative regulation of insulin receptor signaling pathway,GO:0051092-positive regulation of NF-kappaB transcription factor activity,GO:0051973-positive regulation of telomerase activity,GO:0060326-cell chemotaxis,GO:0070233-negative regulation of T cell apoptotic process,GO:0090330-regulation of platelet aggregation,GO:1904355-positive regulation of telomere capping,GO:2000318-positive regulation of T-helper 17 type immune response,GO:2000570-positive regulation of T-helper 2 cell activation, |
| Cvx    | UP         | CPD          | carboxypeptidase D(CPD)                                                     | GO:0006518-peptide metabolic process,GO:0016485-protein processing,                                                                                                                                                                                                                                                                                                                                                                                                                                                                                                                                                                                                                                                                                                                                                                                                                                                                                                                              |
| Cvx    | UP         | DECR2        | 2,4-dienoyl-CoA reductase 2, peroxisomal(DECR2)                             | GO:0006636-unsaturated fatty acid biosynthetic process,                                                                                                                                                                                                                                                                                                                                                                                                                                                                                                                                                                                                                                                                                                                                                                                                                                                                                                                                          |
| Cvx    | UP         | PCBD1        | pterin-4 alpha-carbinolamine dehydratase 1(PCBD1)                           | GO:0006729-tetrahydrobiopterin biosynthetic process,GO:0051289-protein homotetramerization,GO:0051291-protein heterooligomerization,                                                                                                                                                                                                                                                                                                                                                                                                                                                                                                                                                                                                                                                                                                                                                                                                                                                             |
| Cvx    | UP         | LOC100153094 | glutathione S-transferase theta-1(LOC100153094)                             | GO:0006749-glutathione metabolic process,                                                                                                                                                                                                                                                                                                                                                                                                                                                                                                                                                                                                                                                                                                                                                                                                                                                                                                                                                        |
| Cvx    | UP         | GGA2         | golgi associated, gamma adaptin ear containing, ARF binding protein 2(GGA2) | GO:0006886-intracellular protein transport,GO:0016192-vesicle-mediated transport,                                                                                                                                                                                                                                                                                                                                                                                                                                                                                                                                                                                                                                                                                                                                                                                                                                                                                                                |
| Cvx    | UP         | VAMP2        | vesicle associated membrane protein 2(VAMP2)                                | GO:0006887-exocytosis,GO:0006906-vesicle fusion,GO:0016079-synaptic vesicle exocytosis,GO:0017157-regulation of exocytosis,GO:0032869-cellular response to insulin stimulus,GO:0043001-Golgi to plasma membrane protein transport,GO:0060291-long-term synaptic potentiation,GO:0090316-positive regulation of intracellular protein transport,                                                                                                                                                                                                                                                                                                                                                                                                                                                                                                                                                                                                                                                  |
| Cvx    | UP         | AKAP9        | A-kinase anchoring protein 9(AKAP9)                                         | GO:0007165-signal transduction,                                                                                                                                                                                                                                                                                                                                                                                                                                                                                                                                                                                                                                                                                                                                                                                                                                                                                                                                                                  |
| Cvx    | UP         | NDRG4        | NDRG family member 4(NDRG4)                                                 | GO:0007165-signal transduction,GO:0007420-brain development,GO:0010642-negative regulation of platelet-derived growth factor receptor signaling pathway,GO:0014912-negative regulation of smooth muscle cell migration,GO:0048662-negative regulation of smooth muscle cell proliferation,GO:0070374-positive regulation of ERK1 and ERK2 cascade,                                                                                                                                                                                                                                                                                                                                                                                                                                                                                                                                                                                                                                               |
| Cvx    | UP         | IGF1R        | insulin like growth factor 1 receptor(IGF1R)                                | GO:0007169-transmembrane receptor protein tyrosine kinase signaling pathway,GO:0018108-peptidyl-tyrosine phosphorylation,GO:0043066-negative regulation of apoptotic process,GO:0046328-regulation of JNK cascade,GO:0046777-protein autophosphorylation,GO:0051389-inactivation of MAPKK activity,                                                                                                                                                                                                                                                                                                                                                                                                                                                                                                                                                                                                                                                                                              |
| Cvx    | UP         | MYLIP        | myosin regulatory light chain interacting protein(MYLIP)                    | GO:0007399-nervous system development,GO:0010989-negative regulation of low-density lipoprotein particle clearance,GO:0031648-protein destabilization,GO:0032803-regulation of low-density lipoprotein particle receptor catabolic process,GO:0042632-cholesterol homeostasis,GO:0042787-protein ubiquitination involved in ubiquitin-dependent protein catabolic process,GO:0045732-positive regulation of protein catabolic process,                                                                                                                                                                                                                                                                                                                                                                                                                                                                                                                                                           |
| Cvx    | UP         | KCNQ4        | potassium voltage-gated channel subfamily Q member 4(KCNQ4)                 | GO:0007605-sensory perception of sound,GO:0042472-inner ear morphogenesis,                                                                                                                                                                                                                                                                                                                                                                                                                                                                                                                                                                                                                                                                                                                                                                                                                                                                                                                       |
| Cvx    | UP         | ENPP5        | ectonucleotide pyrophosphatase/phosphodiesterase 5 (putative)(ENPP5)        | GO:0008152-metabolic process,                                                                                                                                                                                                                                                                                                                                                                                                                                                                                                                                                                                                                                                                                                                                                                                                                                                                                                                                                                    |
| Cvx    | UP         | CCDC130      | coiled-coil domain containing 130(CCDC130)                                  | GO:0009615-response to virus,                                                                                                                                                                                                                                                                                                                                                                                                                                                                                                                                                                                                                                                                                                                                                                                                                                                                                                                                                                    |
| Cvx    | UP         | DDX17        | DEAD-box helicase 17(DDX17)                                                 | GO:0010501-RNA secondary structure unwinding,GO:0045893-positive regulation of transcription, DNA-templated,                                                                                                                                                                                                                                                                                                                                                                                                                                                                                                                                                                                                                                                                                                                                                                                                                                                                                     |
| Cvx    | UP         | NTN4         | netrin 4(NTN4)                                                              | GO:0016322-neuron remodeling,GO:0060668-regulation of branching involved in salivary gland morphogenesis by extracellular matrix-epithelial cell signaling,                                                                                                                                                                                                                                                                                                                                                                                                                                                                                                                                                                                                                                                                                                                                                                                                                                      |
| Cvx    | UP         | LOC102166095 | nuclear receptor coactivator 2-like(LOC102166095)                           | GO:0030522-intracellular receptor signaling pathway,GO:0032870-cellular response to hormone stimulus,GO:0045944-positive regulation of transcription from RNA polymerase II promoter,                                                                                                                                                                                                                                                                                                                                                                                                                                                                                                                                                                                                                                                                                                                                                                                                            |
| Cvx    | UP         | RNF149       | ring finger protein 149(RNF149)                                             | GO:0031647-regulation of protein stability,GO:0035690-cellular response to drug,GO:0043409-negative regulation of MAPK cascade,                                                                                                                                                                                                                                                                                                                                                                                                                                                                                                                                                                                                                                                                                                                                                                                                                                                                  |
| Cvx    | UP         | SESN3        | sestrin 3(SESN3)                                                            | GO:0032868-response to insulin,GO:0042593-glucose homeostasis,GO:0051896-regulation of protein kinase B signaling,GO:0071230-cellular response to amino acid stimulus,GO:1901031-regulation of response to reactive oxygen species,GO:1904262-negative regulation of TORC1 signaling,                                                                                                                                                                                                                                                                                                                                                                                                                                                                                                                                                                                                                                                                                                            |
| Cvx    | UP         | HDAC9        | histone deacetylase 9(HDAC9)                                                | GO:0040029-regulation of gene expression, epigenetic,                                                                                                                                                                                                                                                                                                                                                                                                                                                                                                                                                                                                                                                                                                                                                                                                                                                                                                                                            |
| Cvx    | UP         | CDKAL1       | CDK5 regulatory subunit associated protein 1 like 1(CDKAL1)                 | GO:1990145-maintenance of translational fidelity,                                                                                                                                                                                                                                                                                                                                                                                                                                                                                                                                                                                                                                                                                                                                                                                                                                                                                                                                                |
| Cvx    | DOWN       | PAPSS2       | 3'-phosphoadenosine 5'-phosphosulfate synthase 2(PAPSS2)                    | GO:0000103-sulfate assimilation,GO:0007596-blood coagulation,GO:0050428-3'-phosphoadenosine 5'-phosphosulfate biosynthetic process,GO:0060348-bone development,GO:0070814-hydrogen sulfide biosynthetic process,                                                                                                                                                                                                                                                                                                                                                                                                                                                                                                                                                                                                                                                                                                                                                                                 |
| Cvx    | DOWN       | TDG          | thymine-DNA glycosylase(TDG)                                                | GO:0000122-negative regulation of transcription from RNA polymerase II promoter,GO:0006285-base-excision repair, AP site formation,GO:0006298-mismatch repair,GO:0009790-embryo development,GO:0032091-negative regulation of protein binding,GO:0035562-negative regulation of chromatin binding,GO:0040029-regulation of gene expression, epigenetic,GO:0080111-DNA demethylation,                                                                                                                                                                                                                                                                                                                                                                                                                                                                                                                                                                                                             |

|     |      |              |                                                          |                                                                                                                                                                                                                                                                                                                                                                                                                                                                                                                                                                                                                                                                                                                                                                                                                                                                                                                                                                                                                                                                                                                                                                                                                                                                                                                                                                                                                                                                                                                                                                                                                                                                                                                                                                                                                                                                                                                                                                                                                                                                                                                                                                                                                                                                                                                                                                                                                                                                                |
|-----|------|--------------|----------------------------------------------------------|--------------------------------------------------------------------------------------------------------------------------------------------------------------------------------------------------------------------------------------------------------------------------------------------------------------------------------------------------------------------------------------------------------------------------------------------------------------------------------------------------------------------------------------------------------------------------------------------------------------------------------------------------------------------------------------------------------------------------------------------------------------------------------------------------------------------------------------------------------------------------------------------------------------------------------------------------------------------------------------------------------------------------------------------------------------------------------------------------------------------------------------------------------------------------------------------------------------------------------------------------------------------------------------------------------------------------------------------------------------------------------------------------------------------------------------------------------------------------------------------------------------------------------------------------------------------------------------------------------------------------------------------------------------------------------------------------------------------------------------------------------------------------------------------------------------------------------------------------------------------------------------------------------------------------------------------------------------------------------------------------------------------------------------------------------------------------------------------------------------------------------------------------------------------------------------------------------------------------------------------------------------------------------------------------------------------------------------------------------------------------------------------------------------------------------------------------------------------------------|
| Cvx | DOWN | THBS1        | thrombospondin 1(THBS1)                                  | GO:000187-activation of MAPK activity,GO:0001937-negative regulation of endothelial cell proliferation,GO:0001953-negative regulation of cell-matrix adhesion,GO:0002040-sprouting angiogenesis,GO:0002544-chronic inflammatory response,GO:0002581-negative regulation of antigen processing and presentation of peptide or polysaccharide antigen via MHC class II,GO:0002605-negative regulation of dendritic cell antigen processing and presentation,GO:0006954-inflammatory response,GO:0006955-immune response,GO:0007050-cell cycle arrest,GO:0007155-cell adhesion,GO:0009749-response to glucose,GO:0010748-negative regulation of plasma membrane long-chain fatty acid transport,GO:0010751-negative regulation of nitric oxide mediated signal transduction,GO:0010754-negative regulation of cGMP-mediated signaling,GO:0010757-negative regulation of plasminogen activation,GO:0010763-positive regulation of fibroblast migration,GO:0016477-cell migration,GO:0016525-negative regulation of angiogenesis,GO:0018149-peptide cross-linking,GO:0030511-positive regulation of transforming growth factor beta receptor signaling pathway,GO:0030823-regulation of cGMP metabolic process,GO:0032026-response to magnesium ion,GO:0032695-negative regulation of interleukin-12 production,GO:0040037-negative regulation of fibroblast growth factor receptor signaling pathway,GO:0042493-response to drug,GO:0042535-positive regulation of tumor necrosis factor biosynthetic process,GO:0043032-positive regulation of macrophage activation,GO:0043154-negative regulation of cysteine-type endopeptidase activity involved in apoptotic process,GO:0043536-positive regulation of blood vessel endothelial cell migration,GO:0043537-negative regulation of blood vessel endothelial cell migration,GO:0043652-engulfment of apoptotic cell,GO:0045727-positive regulation of translation,GO:0045766-positive regulation of angiogenesis,GO:0050921-positive regulation of chemotaxis,GO:0051592-response to calcium ion,GO:0051897-positive regulation of protein kinase B signaling,GO:0051918-negative regulation of fibrinolysis,GO:1902043-positive regulation of extrinsic apoptotic signaling pathway via death domain receptors,GO:2000353-positive regulation of endothelial cell apoptotic process,GO:2000379-positive regulation of reactive oxygen species metabolic process,GO:2001027-negative regulation of endothelial cell chemotaxis, |
| Cvx | DOWN | VCAN         | versican(VCAN)                                           | GO:0001501-skeletal system development,GO:0001649-osteoblast differentiation,GO:0007155-cell adhesion,GO:0007417-central nervous system development,                                                                                                                                                                                                                                                                                                                                                                                                                                                                                                                                                                                                                                                                                                                                                                                                                                                                                                                                                                                                                                                                                                                                                                                                                                                                                                                                                                                                                                                                                                                                                                                                                                                                                                                                                                                                                                                                                                                                                                                                                                                                                                                                                                                                                                                                                                                           |
| Cvx | DOWN | ENPEP        | glutamyl aminopeptidase(ENPEP)                           | GO:0001525-angiogenesis,GO:0002003-angiotensin maturation,GO:0003081-regulation of systemic arterial blood pressure by renin-angiotensin,GO:0006508-proteolysis,GO:0008217-regulation of blood pressure,GO:0008283-cell proliferation,GO:0016477-cell migration,GO:0032835-glomerulus development,GO:0043171-peptide catabolic process,                                                                                                                                                                                                                                                                                                                                                                                                                                                                                                                                                                                                                                                                                                                                                                                                                                                                                                                                                                                                                                                                                                                                                                                                                                                                                                                                                                                                                                                                                                                                                                                                                                                                                                                                                                                                                                                                                                                                                                                                                                                                                                                                        |
| Cvx | DOWN | SRPX2        | sushi repeat containing protein, X-linked 2(SRPX2)       | GO:0001525-angiogenesis,GO:0016337-single organismal cell-cell adhesion,GO:0042325-regulation of phosphorylation,GO:0048870-cell motility,GO:0051965-positive regulation of synapse assembly,GO:0071625-vocalization behavior,GO:0090050-positive regulation of cell migration involved in sprouting angiogenesis,                                                                                                                                                                                                                                                                                                                                                                                                                                                                                                                                                                                                                                                                                                                                                                                                                                                                                                                                                                                                                                                                                                                                                                                                                                                                                                                                                                                                                                                                                                                                                                                                                                                                                                                                                                                                                                                                                                                                                                                                                                                                                                                                                             |
| Cvx | DOWN | GJA1         | gap junction protein alpha 1(GJA1)                       | GO:0001649-osteoblast differentiation,GO:0001701-in utero embryonic development,GO:0001764-neuron migration,GO:0001947-heart looping,GO:0002070-epithelial cell maturation,GO:0002088-lens development in camera-type eye,GO:0002931-response to ischemia,GO:0003294-atrial ventricular junction remodeling,GO:0007154-cell communication,GO:0007267-cell-cell signaling,GO:0007507-heart development,GO:0007512-adult heart development,GO:0009611-response to wounding,GO:0010628-positive regulation of gene expression,GO:0010629-negative regulation of gene expression,GO:0010643-cell communication by chemical coupling,GO:0030308-negative regulation of cell growth,GO:0030500-regulation of bone mineralization,GO:0036120-cellular response to platelet-derived growth factor stimulus,GO:0042733-embryonic digit morphogenesis,GO:0043123-positive regulation of I-kappaB kinase/NF-kappaB signaling,GO:0043403-skeletal muscle tissue regeneration,GO:0045216-cell-cell junction organization,GO:0045669-positive regulation of osteoblast differentiation,GO:0045844-positive regulation of striated muscle tissue development,GO:0046850-regulation of bone remodeling,GO:0048514-blood vessel morphogenesis,GO:0055085-transmembrane transport,GO:0060156-milk ejection,GO:0060307-regulation of ventricular cardiac muscle cell membrane repolarization,GO:0060371-regulation of atrial cardiac muscle cell membrane depolarization,GO:0060373-regulation of ventricular cardiac muscle cell membrane depolarization,GO:0061337-cardiac conduction,GO:0071673-positive regulation of smooth muscle cell chemotaxis,                                                                                                                                                                                                                                                                                                                                                                                                                                                                                                                                                                                                                                                                                                                                                                                                                                          |
| Cvx | DOWN | PLAT         | plasminogen activator, tissue type(PLAT)                 | GO:0001666-response to hypoxia,GO:0014909-smooth muscle cell migration,GO:0031639-plasminogen activation,GO:0045861-negative regulation of proteolysis,GO:0048008-platelet-derived growth factor receptor signaling pathway,                                                                                                                                                                                                                                                                                                                                                                                                                                                                                                                                                                                                                                                                                                                                                                                                                                                                                                                                                                                                                                                                                                                                                                                                                                                                                                                                                                                                                                                                                                                                                                                                                                                                                                                                                                                                                                                                                                                                                                                                                                                                                                                                                                                                                                                   |
| Cvx | DOWN | PLOD2        | procollagen-lysine,2-oxoglutarate 5-dioxygenase 2(PLOD2) | GO:0001666-response to hypoxia,GO:0098779-mitophagy in response to mitochondrial depolarization,                                                                                                                                                                                                                                                                                                                                                                                                                                                                                                                                                                                                                                                                                                                                                                                                                                                                                                                                                                                                                                                                                                                                                                                                                                                                                                                                                                                                                                                                                                                                                                                                                                                                                                                                                                                                                                                                                                                                                                                                                                                                                                                                                                                                                                                                                                                                                                               |
| Cvx | DOWN | MAN2A1       | mannosidase alpha class 2A member 1(MAN2A1)              | GO:0001701-in utero embryonic development,GO:0001889-liver development,GO:006013-mannose metabolic process,GO:006491-N-glycan processing,GO:006517-protein deglycosylation,GO:0007005-mitochondrion organization,GO:0007033-vacuole organization,GO:0007585-respiratory gaseous exchange,GO:0048286-lung alveolus development,GO:0050769-positive regulation of neurogenesis,GO:0060042-retina morphogenesis in camera-type eye,                                                                                                                                                                                                                                                                                                                                                                                                                                                                                                                                                                                                                                                                                                                                                                                                                                                                                                                                                                                                                                                                                                                                                                                                                                                                                                                                                                                                                                                                                                                                                                                                                                                                                                                                                                                                                                                                                                                                                                                                                                               |
| Cvx | DOWN | LOC100739844 | semaphorin-3A-like(LOC100739844)                         | GO:0001755-neural crest cell migration,GO:0021772-olfactory bulb development,GO:0048843-negative regulation of axon extension involved in axon guidance,GO:0050919-negative chemotaxis,GO:0071526-semaphorin-plexin signaling pathway,GO:2001224-positive regulation of neuron migration,                                                                                                                                                                                                                                                                                                                                                                                                                                                                                                                                                                                                                                                                                                                                                                                                                                                                                                                                                                                                                                                                                                                                                                                                                                                                                                                                                                                                                                                                                                                                                                                                                                                                                                                                                                                                                                                                                                                                                                                                                                                                                                                                                                                      |
| Cvx | DOWN | S1PR3        | sphingosine-1-phosphate receptor 3(S1PR3)                | GO:0001816-cytokine production,GO:0006954-inflammatory response,GO:0007193-adenylate cyclase-inhibiting G-protein coupled receptor signaling pathway,GO:0007219-Notch signaling pathway,GO:0032651-regulation of interleukin-1 beta production,GO:1903141-negative regulation of establishment of endothelial barrier,                                                                                                                                                                                                                                                                                                                                                                                                                                                                                                                                                                                                                                                                                                                                                                                                                                                                                                                                                                                                                                                                                                                                                                                                                                                                                                                                                                                                                                                                                                                                                                                                                                                                                                                                                                                                                                                                                                                                                                                                                                                                                                                                                         |
| Cvx | DOWN | AGPAT2       | 1-acylglycerol-3-phosphate O-acyltransferase 2(AGPAT2)   | GO:0001819-positive regulation of cytokine production,GO:0006654-phosphatidic acid biosynthetic process,GO:0008654-phospholipid biosynthetic process,GO:0046474-glycerophospholipid biosynthetic process,                                                                                                                                                                                                                                                                                                                                                                                                                                                                                                                                                                                                                                                                                                                                                                                                                                                                                                                                                                                                                                                                                                                                                                                                                                                                                                                                                                                                                                                                                                                                                                                                                                                                                                                                                                                                                                                                                                                                                                                                                                                                                                                                                                                                                                                                      |
| Cvx | DOWN | SEPHS2       | selenophosphate synthetase 2(SEPHS2)                     | GO:0001887-selenium compound metabolic process,GO:0016260-selenocysteine biosynthetic process,GO:0016310-phosphorylation,                                                                                                                                                                                                                                                                                                                                                                                                                                                                                                                                                                                                                                                                                                                                                                                                                                                                                                                                                                                                                                                                                                                                                                                                                                                                                                                                                                                                                                                                                                                                                                                                                                                                                                                                                                                                                                                                                                                                                                                                                                                                                                                                                                                                                                                                                                                                                      |
| Cvx | DOWN | RIPK3        | receptor interacting serine/threonine kinase 3(RIPK3)    | GO:0001914-regulation of T cell mediated cytotoxicity,GO:0007249-I-kappaB kinase/NF-kappaB signaling,GO:0010922-positive regulation of phosphatase activity,GO:0032147-activation of protein kinase activity,GO:0032649-regulation of interferon-gamma production,GO:0033077-T cell differentiation in thymus,GO:0043029-T cell homeostasis,GO:0046006-regulation of activated T cell proliferation,GO:0046777-protein autophosphorylation,GO:0048535-lymph node development,GO:0048536-spleen development,GO:0048538-thymus development,GO:0051092-positive regulation of NF-kappaB transcription factor activity,GO:0051260-protein homooligomerization,GO:0051291-protein heterooligomerization,GO:0051351-positive regulation of ligase activity,GO:0051353-positive regulation of oxidoreductase activity,GO:0060545-positive regulation of necroptotic process,GO:0070235-regulation of activation-induced cell death of T cells,GO:0070266-necroptotic process,GO:0090312-positive regulation of protein deacetylation,GO:1990000-amyloid fibril formation,GO:2000379-positive regulation of reactive oxygen species metabolic process,GO:2000452-regulation of CD8-positive, alpha-beta cytotoxic T cell extravasation,GO:2001244-positive regulation of intrinsic apoptotic signaling pathway,                                                                                                                                                                                                                                                                                                                                                                                                                                                                                                                                                                                                                                                                                                                                                                                                                                                                                                                                                                                                                                                                                                                                                                        |
| Cvx | DOWN | PLAUR        | plasminogen activator, urokinase receptor(PLAUR)         | GO:0001934-positive regulation of protein phosphorylation,GO:0030162-regulation of proteolysis,GO:0038195-urokinase plasminogen activator signaling pathway,GO:0043388-positive regulation of DNA binding,GO:0045742-positive regulation of epidermal growth factor receptor signaling pathway,GO:0090200-positive regulation of release of cytochrome c from mitochondria,GO:2001243-negative regulation of intrinsic apoptotic signaling pathway,GO:2001268-negative regulation of cysteine-type endopeptidase activity involved in apoptotic signaling pathway,                                                                                                                                                                                                                                                                                                                                                                                                                                                                                                                                                                                                                                                                                                                                                                                                                                                                                                                                                                                                                                                                                                                                                                                                                                                                                                                                                                                                                                                                                                                                                                                                                                                                                                                                                                                                                                                                                                             |
| Cvx | DOWN | B4GALT1      | beta-1,4-galactosyltransferase 1(B4GALT1)                | GO:0002064-epithelial cell development,GO:0002526-acute inflammatory response,GO:0005989-lactose biosynthetic process,GO:0006012-galactose metabolic process,GO:0006487-protein N-linked glycosylation,GO:0007155-cell adhesion,GO:0007339-binding of sperm to zona pellucida,GO:0007341-penetration of zona pellucida,GO:0008285-negative regulation of cell proliferation,GO:0030198-extracellular matrix organization,GO:0030879-mammary gland development,GO:0045136-development of secondary sexual characteristics,GO:0048754-branching morphogenesis of an epithelial tube,GO:0050900-leukocyte migration,GO:0051270-regulation of cellular component movement,GO:0060046-regulation of acrosome reaction,GO:0060054-positive regulation of epithelial cell proliferation involved in wound healing,GO:0060055-angiogenesis involved in wound healing,GO:0060058-positive regulation of apoptotic process involved in mammary gland involution,                                                                                                                                                                                                                                                                                                                                                                                                                                                                                                                                                                                                                                                                                                                                                                                                                                                                                                                                                                                                                                                                                                                                                                                                                                                                                                                                                                                                                                                                                                                         |
| Cvx | DOWN | FGFBP1       | fibroblast growth factor binding protein 1(FGFBP1)       | GO:0002230-positive regulation of defense response to virus by host,GO:0008284-positive regulation of cell proliferation,GO:0045743-positive regulation of fibroblast growth factor receptor signaling pathway,GO:0098779-mitophagy in response to mitochondrial depolarization,GO:0098792-xenophagy,                                                                                                                                                                                                                                                                                                                                                                                                                                                                                                                                                                                                                                                                                                                                                                                                                                                                                                                                                                                                                                                                                                                                                                                                                                                                                                                                                                                                                                                                                                                                                                                                                                                                                                                                                                                                                                                                                                                                                                                                                                                                                                                                                                          |
| Cvx | DOWN | ANXA5        | annexin A5(ANXA5)                                        | GO:0002230-positive regulation of defense response to virus by host,GO:0010033-response to organic substance,GO:0050819-negative regulation of coagulation,GO:0098779-mitophagy in response to mitochondrial depolarization,GO:0098792-xenophagy,                                                                                                                                                                                                                                                                                                                                                                                                                                                                                                                                                                                                                                                                                                                                                                                                                                                                                                                                                                                                                                                                                                                                                                                                                                                                                                                                                                                                                                                                                                                                                                                                                                                                                                                                                                                                                                                                                                                                                                                                                                                                                                                                                                                                                              |
| Cvx | DOWN | GCNT3        | glucosaminyl (N-acetyl) transferase 3, mucin type(GCNT3) | GO:0002426-immunoglobulin production in mucosal tissue,GO:0048729-tissue morphogenesis,GO:0050892-intestinal absorption,GO:0060993-kidney morphogenesis,                                                                                                                                                                                                                                                                                                                                                                                                                                                                                                                                                                                                                                                                                                                                                                                                                                                                                                                                                                                                                                                                                                                                                                                                                                                                                                                                                                                                                                                                                                                                                                                                                                                                                                                                                                                                                                                                                                                                                                                                                                                                                                                                                                                                                                                                                                                       |
| Cvx | DOWN | CXCL10       | C-X-C motif chemokine ligand 10(CXCL10)                  | GO:0002690-positive regulation of leukocyte chemotaxis,GO:0006954-inflammatory response,GO:0006955-immune response,GO:0007186-G-protein coupled receptor signaling pathway,GO:0008284-positive regulation of cell proliferation,GO:0010818-T cell chemotaxis,GO:0010819-regulation of T cell chemotaxis,GO:0030816-positive regulation of cAMP metabolic process,GO:0032496-response to lipopolysaccharide,GO:0042118-endothelial cell activation,GO:0042127-regulation of cell proliferation,GO:0043950-positive regulation of cAMP-mediated signaling,GO:0045662-negative regulation of myoblast differentiation,GO:0051281-positive regulation of release of sequestered calcium ion into cytosol,GO:0051607-defense response to virus,GO:0060326-cell chemotaxis,GO:0070098-chemokine-mediated signaling                                                                                                                                                                                                                                                                                                                                                                                                                                                                                                                                                                                                                                                                                                                                                                                                                                                                                                                                                                                                                                                                                                                                                                                                                                                                                                                                                                                                                                                                                                                                                                                                                                                                   |

|     |      |              |                                                                                              |                                                                                                                                                                                                                                                                                                                                                                                                                                                                                                                                                                                                                                                                                                                                                     |
|-----|------|--------------|----------------------------------------------------------------------------------------------|-----------------------------------------------------------------------------------------------------------------------------------------------------------------------------------------------------------------------------------------------------------------------------------------------------------------------------------------------------------------------------------------------------------------------------------------------------------------------------------------------------------------------------------------------------------------------------------------------------------------------------------------------------------------------------------------------------------------------------------------------------|
|     |      |              |                                                                                              | pathway,GO:0071222-cellular response to lipopolysaccharide,GO:0090026-positive regulation of monocyte chemotaxis,GO:1901509-regulation of endothelial tube morphogenesis,GO:1901740-negative regulation of myoblast fusion,GO:2000406-positive regulation of T cell migration,                                                                                                                                                                                                                                                                                                                                                                                                                                                                      |
| Cvx | DOWN | NPY2R        | neuropeptide Y receptor Y2(NPY2R)                                                            | GO:0003151-outflow tract morphogenesis,GO:0003214-cardiac left ventricle morphogenesis,GO:0007166-cell surface receptor signaling pathway,GO:0007193-adenylate cyclase-inhibiting G-protein coupled receptor signaling pathway,GO:0007218-neuropeptide signaling pathway,GO:0007268-chemical synaptic transmission,GO:0007631-feeding behavior,                                                                                                                                                                                                                                                                                                                                                                                                     |
| Cvx | DOWN | IL6ST        | interleukin 6 signal transducer(IL6ST)                                                       | GO:005977-glycogen metabolic process,GO:0008593-regulation of Notch signaling pathway,GO:0042102-positive regulation of T cell proliferation,GO:0042511-positive regulation of tyrosine phosphorylation of Stat1 protein,GO:0042517-positive regulation of tyrosine phosphorylation of Stat3 protein,GO:0045669-positive regulation of osteoblast differentiation,GO:0048711-positive regulation of astrocyte differentiation,GO:0070106-interleukin-27-mediated signaling pathway,                                                                                                                                                                                                                                                                 |
| Cvx | DOWN | PGD          | phosphogluconate dehydrogenase(PGD)                                                          | GO:0006098-pentose-phosphate shunt,GO:0009051-pentose-phosphate shunt, oxidative branch,GO:0019322-pentose biosynthetic process,GO:0019521-D-gluconate metabolic process,GO:0055114-oxidation-reduction process,                                                                                                                                                                                                                                                                                                                                                                                                                                                                                                                                    |
| Cvx | DOWN | NPR2         | natriuretic peptide receptor B/guanylate cyclase B (atriatriuretic peptide receptor B)(NPR2) | GO:0006182-cGMP biosynthetic process,GO:0007168-receptor guanylyl cyclase signaling pathway,GO:0035556-intracellular signal transduction,GO:0044702-single organism reproductive process,GO:0051447-negative regulation of meiotic cell cycle,GO:0060348-bone development,GO:0097011-cellular response to granulocyte macrophage colony-stimulating factor stimulus,GO:1900194-negative regulation of oocyte maturation,                                                                                                                                                                                                                                                                                                                            |
| Cvx | DOWN | CMPK2        | cytidine/uridine monophosphate kinase 2(CMPK2)                                               | GO:0006227-dUDP biosynthetic process,GO:0006233-dTDP biosynthetic process,GO:0006235-dTTP biosynthetic process,GO:0071222-cellular response to lipopolysaccharide,                                                                                                                                                                                                                                                                                                                                                                                                                                                                                                                                                                                  |
| Cvx | DOWN | FAM111A      | family with sequence similarity 111 member A(FAM111A)                                        | GO:0006260-DNA replication,GO:0045071-negative regulation of viral genome replication,                                                                                                                                                                                                                                                                                                                                                                                                                                                                                                                                                                                                                                                              |
| Cvx | DOWN | SLC25A17     | solute carrier family 25 member 17(SLC25A17)                                                 | GO:0006412-translation,GO:0006635-fatty acid beta-oxidation,GO:0015908-fatty acid transport,                                                                                                                                                                                                                                                                                                                                                                                                                                                                                                                                                                                                                                                        |
| Cvx | DOWN | GARS         | glycyl-tRNA synthetase(GARS)                                                                 | GO:0006426-glycyl-tRNA aminoacylation,GO:0015966-diaminopurine tetraphosphate biosynthetic process,                                                                                                                                                                                                                                                                                                                                                                                                                                                                                                                                                                                                                                                 |
| Cvx | DOWN | UBA7         | ubiquitin like modifier activating enzyme 7(UBA7)                                            | GO:0006464-cellular protein modification process,GO:0019941-modification-dependent protein catabolic process,GO:0032020-ubiquitin-protein conjugation,                                                                                                                                                                                                                                                                                                                                                                                                                                                                                                                                                                                              |
| Cvx | DOWN | UBASH3B      | ubiquitin associated and SH3 domain containing B(UBASH3B)                                    | GO:0006469-negative regulation of protein kinase activity,GO:0009968-negative regulation of signal transduction,GO:0045671-negative regulation of osteoclast differentiation,GO:0045779-negative regulation of bone resorption,GO:0051279-regulation of release of sequestered calcium ion into cytosol,GO:0090331-negative regulation of platelet aggregation,                                                                                                                                                                                                                                                                                                                                                                                     |
| Cvx | DOWN | NPC1         | NPC intracellular cholesterol transporter 1(NPC1)                                            | GO:0006486-protein glycosylation,GO:0006897-endocytosis,GO:0006914-autophagy,GO:0007041-lysosomal transport,GO:0007628-adult walking behavior,GO:0008203-cholesterol metabolic process,GO:0008206-bile acid metabolic process,GO:0016242-negative regulation of macroautophagy,GO:0030301-cholesterol transport,GO:0031579-membrane raft organization,GO:0033344-cholesterol efflux,GO:0042493-response to drug,GO:0042632-cholesterol homeostasis,GO:0046718-viral entry into host cell,GO:0071383-cellular response to steroid hormone stimulus,GO:0071404-cellular response to low-density lipoprotein particle stimulus,GO:0090150-establishment of protein localization to membrane,GO:2000189-positive regulation of cholesterol homeostasis, |
| Cvx | DOWN | B3GALT2      | beta-1,3-galactosyltransferase 2(B3GALT2)                                                    | GO:0006486-protein glycosylation,GO:0009312-oligosaccharide biosynthetic process,                                                                                                                                                                                                                                                                                                                                                                                                                                                                                                                                                                                                                                                                   |
| Cvx | DOWN | CPXM1        | carboxypeptidase X, M14 family member 1(CPXM1)                                               | GO:0006508-proteolysis,                                                                                                                                                                                                                                                                                                                                                                                                                                                                                                                                                                                                                                                                                                                             |
| Cvx | DOWN | INSIG1       | insulin induced gene 1(INSIG1)                                                               | GO:0006641-triglyceride metabolic process,GO:0006695-cholesterol biosynthetic process,GO:0010894-negative regulation of steroid biosynthetic process,GO:0032933-SREBP signaling pathway,GO:0042472-inner ear morphogenesis,GO:0042474-middle ear morphogenesis,GO:0045599-negative regulation of fat cell differentiation,GO:0045717-negative regulation of fatty acid biosynthetic process,GO:0060021-palate development,GO:0060363-cranial suture morphogenesis,GO:1901303-negative regulation of cargo loading into COPII-coated vesicle,                                                                                                                                                                                                        |
| Cvx | DOWN | SGPP2        | sphingosine-1-phosphate phosphatase 2(SGPP2)                                                 | GO:0006670-sphingosine metabolic process,                                                                                                                                                                                                                                                                                                                                                                                                                                                                                                                                                                                                                                                                                                           |
| Cvx | DOWN | HMGCR        | 3-hydroxy-3-methylglutaryl-CoA reductase(HMGCR)                                              | GO:0006695-cholesterol biosynthetic process,GO:0008299-isoprenoid biosynthetic process,GO:0008542-visual learning,GO:0015936-coenzyme A metabolic process,GO:0016126-sterol biosynthetic process,GO:0043407-negative regulation of MAP kinase activity,GO:0051262-protein tetramerization,GO:0055114-oxidation-reduction process,                                                                                                                                                                                                                                                                                                                                                                                                                   |
| Cvx | DOWN | SNX31        | sorting nexin 31(SNX31)                                                                      | GO:0006886-intracellular protein transport,GO:1990126-retrograde transport, endosome to plasma membrane,                                                                                                                                                                                                                                                                                                                                                                                                                                                                                                                                                                                                                                            |
| Cvx | DOWN | ATP6V0C      | ATPase H+ transporting V0 subunit c(ATP6V0C)                                                 | GO:0007042-lysosomal lumen acidification,GO:0015991-ATP hydrolysis coupled proton transport,GO:0030177-positive regulation of Wnt signaling pathway,                                                                                                                                                                                                                                                                                                                                                                                                                                                                                                                                                                                                |
| Cvx | DOWN | CD47         | CD47 molecule(CD47)                                                                          | GO:0007155-cell adhesion,GO:0008228-opsonization,GO:0008284-positive regulation of cell proliferation,GO:0009617-response to bacterium,GO:0050729-positive regulation of inflammatory response,GO:0050766-positive regulation of phagocytosis,GO:0050870-positive regulation of T cell activation,                                                                                                                                                                                                                                                                                                                                                                                                                                                  |
| Cvx | DOWN | DPT          | dermatopontin(DPT)                                                                           | GO:0007155-cell adhesion,GO:0008285-negative regulation of cell proliferation,GO:0030199-collagen fibril organization,                                                                                                                                                                                                                                                                                                                                                                                                                                                                                                                                                                                                                              |
| Cvx | DOWN | CDH7         | cadherin 7(CDH7)                                                                             | GO:0007156-homophilic cell adhesion via plasma membrane adhesion molecules,                                                                                                                                                                                                                                                                                                                                                                                                                                                                                                                                                                                                                                                                         |
| Cvx | DOWN | LOC100154959 | olfactory receptor 4K3(LOC100154959)                                                         | GO:0007186-G-protein coupled receptor signaling pathway,GO:0050907-detection of chemical stimulus involved in sensory perception,                                                                                                                                                                                                                                                                                                                                                                                                                                                                                                                                                                                                                   |
| Cvx | DOWN | RASD1        | ras related dexamethasone induced 1(RASD1)                                                   | GO:0007264-small GTPase mediated signal transduction,                                                                                                                                                                                                                                                                                                                                                                                                                                                                                                                                                                                                                                                                                               |
| Cvx | DOWN | KSR1         | kinase suppressor of ras 1(KSR1)                                                             | GO:0007265-Ras protein signal transduction,GO:0019933-cAMP-mediated signaling,GO:0043410-positive regulation of MAPK cascade,                                                                                                                                                                                                                                                                                                                                                                                                                                                                                                                                                                                                                       |
| Cvx | DOWN | DLGAP2       | DLG associated protein 2(DLGAP2)                                                             | GO:0007270-neuron-neuron synaptic transmission,                                                                                                                                                                                                                                                                                                                                                                                                                                                                                                                                                                                                                                                                                                     |
| Cvx | DOWN | ABHD2        | abhydrolase domain containing 2(ABHD2)                                                       | GO:0007340-acrosome reaction,GO:0009611-response to wounding,GO:0030336-negative regulation of cell migration,GO:0032570-response to progesterone,GO:0046464-acylglycerol catabolic process,GO:0048240-sperm capacitation,                                                                                                                                                                                                                                                                                                                                                                                                                                                                                                                          |
| Cvx | DOWN | LOC100511841 | UDP-glucuronosyltransferase 1-10(LOC100511841)                                               | GO:0008152-metabolic process,                                                                                                                                                                                                                                                                                                                                                                                                                                                                                                                                                                                                                                                                                                                       |
| Cvx | DOWN | HMGCS1       | 3-hydroxy-3-methylglutaryl-CoA synthase 1(HMGCS1)                                            | GO:0008299-isoprenoid biosynthetic process,                                                                                                                                                                                                                                                                                                                                                                                                                                                                                                                                                                                                                                                                                                         |
| Cvx | DOWN | PALM2        | paralemmin 2(PALM2)                                                                          | GO:0008360-regulation of cell shape,                                                                                                                                                                                                                                                                                                                                                                                                                                                                                                                                                                                                                                                                                                                |
| Cvx | DOWN | RSAD2        | radical S-adenosyl methionine domain containing 2(RSAD2)                                     | GO:0009615-response to virus,GO:0034157-positive regulation of toll-like receptor 7 signaling pathway,GO:0034165-positive regulation of toll-like receptor 9 signaling pathway,GO:0035710-CD4-positive, alpha-beta T cell activation,GO:0043367-CD4-positive, alpha-beta T cell differentiation,GO:0045071-negative regulation of viral genome replication,GO:0045087-innate immune response,GO:0050709-negative regulation of protein secretion,GO:0051607-defense response to virus,GO:2000553-positive regulation of T-helper 2 cell cytokine production,                                                                                                                                                                                        |
| Cvx | DOWN | SLC30A7      | solute carrier family 30 member 7(SLC30A7)                                                   | GO:0010043-response to zinc ion,GO:0032119-sequestering of zinc ion,GO:0061088-regulation of sequestering of zinc ion,                                                                                                                                                                                                                                                                                                                                                                                                                                                                                                                                                                                                                              |
| Cvx | DOWN | DRAM1        | DNA damage regulated autophagy modulator 1(DRAM1)                                            | GO:0010506-regulation of autophagy,                                                                                                                                                                                                                                                                                                                                                                                                                                                                                                                                                                                                                                                                                                                 |
| Cvx | DOWN | MMP3         | matrix metalloproteinase 3 (stromelysin 1, progelatinase)(MMP3)                              | GO:0010727-negative regulation of hydrogen peroxide metabolic process,GO:0032461-positive regulation of protein oligomerization,                                                                                                                                                                                                                                                                                                                                                                                                                                                                                                                                                                                                                    |
| Cvx | DOWN | XPNPEP1      | X-prolyl aminopeptidase 1(XPNPEP1)                                                           | GO:0010815-bradykinin catabolic process,                                                                                                                                                                                                                                                                                                                                                                                                                                                                                                                                                                                                                                                                                                            |
| Cvx | DOWN | IER3         | immediate early response 3(IER3)                                                             | GO:0010941-regulation of cell death,GO:0043066-negative regulation of apoptotic process,GO:2001020-regulation of response to DNA damage stimulus,                                                                                                                                                                                                                                                                                                                                                                                                                                                                                                                                                                                                   |
| Cvx | DOWN | IFRD1        | interferon related developmental regulator 1(IFRD1)                                          | GO:0014706-striated muscle tissue development,GO:0030517-negative regulation of axon extension,GO:0042692-muscle cell differentiation,GO:0043403-skeletal muscle tissue regeneration,GO:0048671-negative regulation of collateral sprouting,                                                                                                                                                                                                                                                                                                                                                                                                                                                                                                        |
| Cvx | DOWN | MFS2A        | major facilitator superfamily domain containing 2A(MFS2A)                                    | GO:0015908-fatty acid transport,GO:0045056-transcytosis,GO:0060856-establishment of blood-brain barrier,GO:1990379-lipid transport across blood brain barrier,                                                                                                                                                                                                                                                                                                                                                                                                                                                                                                                                                                                      |
| Cvx | DOWN | PANK3        | pantothenate kinase 3(PANK3)                                                                 | GO:0015937-coenzyme A biosynthetic process,                                                                                                                                                                                                                                                                                                                                                                                                                                                                                                                                                                                                                                                                                                         |

|        |      |              |                                                                                         |                                                                                                                                                                                                                                                                                                                                                                                                                                                                                                                                                                                                                                                                                                                                                                                                                                                                                                                                                                                                                                                                                                                                                                                                                                                                                                                                                                                                                                                                                                                                                                                                                                                                                                                                                                                                                                                                                                                                                                                                                                           |
|--------|------|--------------|-----------------------------------------------------------------------------------------|-------------------------------------------------------------------------------------------------------------------------------------------------------------------------------------------------------------------------------------------------------------------------------------------------------------------------------------------------------------------------------------------------------------------------------------------------------------------------------------------------------------------------------------------------------------------------------------------------------------------------------------------------------------------------------------------------------------------------------------------------------------------------------------------------------------------------------------------------------------------------------------------------------------------------------------------------------------------------------------------------------------------------------------------------------------------------------------------------------------------------------------------------------------------------------------------------------------------------------------------------------------------------------------------------------------------------------------------------------------------------------------------------------------------------------------------------------------------------------------------------------------------------------------------------------------------------------------------------------------------------------------------------------------------------------------------------------------------------------------------------------------------------------------------------------------------------------------------------------------------------------------------------------------------------------------------------------------------------------------------------------------------------------------------|
| Cvx    | DOWN | SLA-7        | MHC class I antigen 7(SLA-7)                                                            | GO:0019882-antigen processing and presentation,                                                                                                                                                                                                                                                                                                                                                                                                                                                                                                                                                                                                                                                                                                                                                                                                                                                                                                                                                                                                                                                                                                                                                                                                                                                                                                                                                                                                                                                                                                                                                                                                                                                                                                                                                                                                                                                                                                                                                                                           |
| Cvx    | DOWN | TAPBP        | TAP binding protein(TAPBP)                                                              | GO:0019885-antigen processing and presentation of endogenous peptide antigen via MHC class I,                                                                                                                                                                                                                                                                                                                                                                                                                                                                                                                                                                                                                                                                                                                                                                                                                                                                                                                                                                                                                                                                                                                                                                                                                                                                                                                                                                                                                                                                                                                                                                                                                                                                                                                                                                                                                                                                                                                                             |
| Cvx    | DOWN | MX1          | myxovirus (influenza virus) resistance 1, interferon-inducible protein p78 (mouse)(MX1) | GO:0032439-endosome localization,GO:0045071-negative regulation of viral genome replication,GO:0048285-organelle fission,GO:0051607-defense response to virus,GO:0071357-cellular response to type I interferon,GO:1901253-negative regulation of intracellular transport of viral material,                                                                                                                                                                                                                                                                                                                                                                                                                                                                                                                                                                                                                                                                                                                                                                                                                                                                                                                                                                                                                                                                                                                                                                                                                                                                                                                                                                                                                                                                                                                                                                                                                                                                                                                                              |
| Cvx    | DOWN | CYP51        | cytochrome P450, family 51, subfamily A, polypeptide 1(CYP51)                           | GO:0033488-cholesterol biosynthetic process via 24,25-dihydrolanosterol,GO:0055114-oxidation-reduction process,GO:0070988-demethylation,                                                                                                                                                                                                                                                                                                                                                                                                                                                                                                                                                                                                                                                                                                                                                                                                                                                                                                                                                                                                                                                                                                                                                                                                                                                                                                                                                                                                                                                                                                                                                                                                                                                                                                                                                                                                                                                                                                  |
| Cvx    | DOWN | LOC100518083 | E3 ISG15--protein ligase HERC5(LOC100518083)                                            | GO:0042787-protein ubiquitination involved in ubiquitin-dependent protein catabolic process,                                                                                                                                                                                                                                                                                                                                                                                                                                                                                                                                                                                                                                                                                                                                                                                                                                                                                                                                                                                                                                                                                                                                                                                                                                                                                                                                                                                                                                                                                                                                                                                                                                                                                                                                                                                                                                                                                                                                              |
| Cvx    | DOWN | FDPS         | farnesyl diphosphate synthase(FDPS)                                                     | GO:0045337-farnesyl diphosphate biosynthetic process,                                                                                                                                                                                                                                                                                                                                                                                                                                                                                                                                                                                                                                                                                                                                                                                                                                                                                                                                                                                                                                                                                                                                                                                                                                                                                                                                                                                                                                                                                                                                                                                                                                                                                                                                                                                                                                                                                                                                                                                     |
| Cvx    | DOWN | BRINP2       | BMP/retinoic acid inducible neural specific 2(BRINP2)                                   | GO:0045666-positive regulation of neuron differentiation,GO:0045930-negative regulation of mitotic cell cycle,GO:0071300-cellular response to retinoic acid,                                                                                                                                                                                                                                                                                                                                                                                                                                                                                                                                                                                                                                                                                                                                                                                                                                                                                                                                                                                                                                                                                                                                                                                                                                                                                                                                                                                                                                                                                                                                                                                                                                                                                                                                                                                                                                                                              |
| Cvx    | DOWN | NT5C2        | 5'-nucleotidase, cytosolic II(NT5C2)                                                    | GO:0046040-IMP metabolic process,GO:0046085-adenosine metabolic process,                                                                                                                                                                                                                                                                                                                                                                                                                                                                                                                                                                                                                                                                                                                                                                                                                                                                                                                                                                                                                                                                                                                                                                                                                                                                                                                                                                                                                                                                                                                                                                                                                                                                                                                                                                                                                                                                                                                                                                  |
| Cvx    | DOWN | MAPK6        | mitogen-activated protein kinase 6(MAPK6)                                               | GO:0060999-positive regulation of dendritic spine development,                                                                                                                                                                                                                                                                                                                                                                                                                                                                                                                                                                                                                                                                                                                                                                                                                                                                                                                                                                                                                                                                                                                                                                                                                                                                                                                                                                                                                                                                                                                                                                                                                                                                                                                                                                                                                                                                                                                                                                            |
| Cvx    | DOWN | LOC100523138 | transmembrane protein 88-like(LOC100523138)                                             | GO:0090090-negative regulation of canonical Wnt signaling pathway,                                                                                                                                                                                                                                                                                                                                                                                                                                                                                                                                                                                                                                                                                                                                                                                                                                                                                                                                                                                                                                                                                                                                                                                                                                                                                                                                                                                                                                                                                                                                                                                                                                                                                                                                                                                                                                                                                                                                                                        |
| DistUt | UP   | CDC25C       | cell division cycle 25C(CDC25C)                                                         | GO:0000086-G2/M transition of mitotic cell cycle,GO:0007067-mitotic nuclear division,GO:0035335-peptidyl-tyrosine dephosphorylation,GO:0051301-cell division,                                                                                                                                                                                                                                                                                                                                                                                                                                                                                                                                                                                                                                                                                                                                                                                                                                                                                                                                                                                                                                                                                                                                                                                                                                                                                                                                                                                                                                                                                                                                                                                                                                                                                                                                                                                                                                                                             |
| DistUt | UP   | NCOR2        | nuclear receptor corepressor 2(NCOR2)                                                   | GO:0000122-negative regulation of transcription from RNA polymerase II promoter,                                                                                                                                                                                                                                                                                                                                                                                                                                                                                                                                                                                                                                                                                                                                                                                                                                                                                                                                                                                                                                                                                                                                                                                                                                                                                                                                                                                                                                                                                                                                                                                                                                                                                                                                                                                                                                                                                                                                                          |
| DistUt | UP   | CNOT2        | CCR4-NOT transcription complex subunit 2(CNOT2)                                         | GO:0000122-negative regulation of transcription from RNA polymerase II promoter,GO:0000288-nuclear-transcribed mRNA catabolic process, deadenylation-dependent decay,GO:001829-trophoblast cell differentiation,GO:0010606-positive regulation of cytoplasmic mRNA processing body assembly,GO:0017148-negative regulation of translation,GO:0033147-negative regulation of intracellular estrogen receptor signaling pathway,GO:2000036-regulation of stem cell population maintenance,                                                                                                                                                                                                                                                                                                                                                                                                                                                                                                                                                                                                                                                                                                                                                                                                                                                                                                                                                                                                                                                                                                                                                                                                                                                                                                                                                                                                                                                                                                                                                  |
| DistUt | UP   | CNOT1        | CCR4-NOT transcription complex subunit 1(CNOT1)                                         | GO:0000122-negative regulation of transcription from RNA polymerase II promoter,GO:0000288-nuclear-transcribed mRNA catabolic process, deadenylation-dependent decay,GO:0010606-positive regulation of cytoplasmic mRNA processing body assembly,GO:0017148-negative regulation of translation,GO:0033147-negative regulation of intracellular estrogen receptor signaling pathway,GO:0035195-gene silencing by miRNA,GO:0048387-negative regulation of retinoic acid receptor signaling pathway,GO:0060213-positive regulation of nuclear-transcribed mRNA poly(A) tail shortening,GO:2000036-regulation of stem cell population maintenance,                                                                                                                                                                                                                                                                                                                                                                                                                                                                                                                                                                                                                                                                                                                                                                                                                                                                                                                                                                                                                                                                                                                                                                                                                                                                                                                                                                                            |
| DistUt | UP   | RARG         | retinoic acid receptor gamma(RARG)                                                      | GO:0000122-negative regulation of transcription from RNA polymerase II promoter,GO:0001843-neural tube closure,GO:0002068-glandular epithelial cell development,GO:0003406-retinal pigment epithelium development,GO:0003430-growth plate cartilage chondrocyte growth,GO:0006351-transcription, DNA-templated,GO:0008284-positive regulation of cell proliferation,GO:0008285-negative regulation of cell proliferation,GO:0009952-anterior/posterior pattern specification,GO:0031076-embryonic camera-type eye development,GO:0032331-negative regulation of chondrocyte differentiation,GO:0035116-embryonic hindlimb morphogenesis,GO:0035264-multicellular organism growth,GO:0043065-positive regulation of apoptotic process,GO:0043066-negative regulation of apoptotic process,GO:0045637-regulation of myeloid cell differentiation,GO:0045944-positive regulation of transcription from RNA polymerase II promoter,GO:0048048-embryonic eye morphogenesis,GO:0060324-face development,GO:0060534-trachea cartilage development,GO:0060740-prostate gland epithelium morphogenesis,GO:0070384-Harderian gland development,GO:0071300-cellular response to retinoic acid,                                                                                                                                                                                                                                                                                                                                                                                                                                                                                                                                                                                                                                                                                                                                                                                                                                                       |
| DistUt | UP   | NFIX         | nuclear factor I X(NFIX)                                                                | GO:0000122-negative regulation of transcription from RNA polymerase II promoter,GO:0006260-DNA replication,GO:0006351-transcription, DNA-templated,GO:0045944-positive regulation of transcription from RNA polymerase II promoter,                                                                                                                                                                                                                                                                                                                                                                                                                                                                                                                                                                                                                                                                                                                                                                                                                                                                                                                                                                                                                                                                                                                                                                                                                                                                                                                                                                                                                                                                                                                                                                                                                                                                                                                                                                                                       |
| DistUt | UP   | EHMT2        | euchromatic histone lysine methyltransferase 2(EHMT2)                                   | GO:0000122-negative regulation of transcription from RNA polymerase II promoter,GO:0006275-regulation of DNA replication,GO:0007130-synaptonemal complex assembly,GO:0007286-spermatid development,GO:0009566-fertilization,GO:0010424-DNA methylation on cytosine within a CG sequence,GO:0035265-organ growth,GO:0036166-phenotypic switching,GO:0048148-behavioral response to cocaine,GO:0048665-neuron fate specification,GO:0071314-cellular response to cocaine,GO:1902902-negative regulation of autophagosome assembly,                                                                                                                                                                                                                                                                                                                                                                                                                                                                                                                                                                                                                                                                                                                                                                                                                                                                                                                                                                                                                                                                                                                                                                                                                                                                                                                                                                                                                                                                                                          |
| DistUt | UP   | RREB1        | ras responsive element binding protein 1(RREB1)                                         | GO:0000122-negative regulation of transcription from RNA polymerase II promoter,GO:0006355-regulation of transcription, DNA-templated,GO:0006366-transcription from RNA polymerase II promoter,GO:0007165-signal transduction,GO:0007275-multicellular organism development,GO:0010634-positive regulation of epithelial cell migration,GO:0033601-positive regulation of mammary gland epithelial cell proliferation,GO:1900026-positive regulation of substrate adhesion-dependent cell spreading,GO:1903691-positive regulation of wound healing, spreading of epidermal cells,GO:2000394-positive regulation of lamellipodium morphogenesis,                                                                                                                                                                                                                                                                                                                                                                                                                                                                                                                                                                                                                                                                                                                                                                                                                                                                                                                                                                                                                                                                                                                                                                                                                                                                                                                                                                                          |
| DistUt | UP   | USP2         | ubiquitin specific peptidase 2(USP2)                                                    | GO:0000122-negative regulation of transcription from RNA polymerase II promoter,GO:0006511-ubiquitin-dependent protein catabolic process,GO:0016579-protein deubiquitination,GO:0032922-circadian regulation of gene expression,GO:0043153-entrainment of circadian clock by photoperiod,GO:0045475-locomotor rhythm,GO:0045931-positive regulation of mitotic cell cycle,GO:0050821-protein stabilization,                                                                                                                                                                                                                                                                                                                                                                                                                                                                                                                                                                                                                                                                                                                                                                                                                                                                                                                                                                                                                                                                                                                                                                                                                                                                                                                                                                                                                                                                                                                                                                                                                               |
| DistUt | UP   | CBX8         | chromobox 8(CBX8)                                                                       | GO:0000122-negative regulation of transcription from RNA polymerase II promoter,GO:0016574-histone ubiquitination,                                                                                                                                                                                                                                                                                                                                                                                                                                                                                                                                                                                                                                                                                                                                                                                                                                                                                                                                                                                                                                                                                                                                                                                                                                                                                                                                                                                                                                                                                                                                                                                                                                                                                                                                                                                                                                                                                                                        |
| DistUt | UP   | NTRK3        | neurotrophic receptor tyrosine kinase 3(NTRK3)                                          | GO:0000187-activation of MAPK activity,GO:0001933-negative regulation of protein phosphorylation,GO:0007169-transmembrane receptor protein tyrosine kinase signaling pathway,GO:0007399-nervous system development,GO:0007507-heart development,GO:0007623-circadian rhythm,GO:0008284-positive regulation of cell proliferation,GO:0010628-positive regulation of gene expression,GO:0018108-peptidyl-tyrosine phosphorylation,GO:0030154-cell differentiation,GO:0030335-positive regulation of cell migration,GO:0032148-activation of protein kinase B activity,GO:0033138-positive regulation of peptidyl-serine phosphorylation,GO:0038179-neurotrophin signaling pathway,GO:0042490-mechanoreceptor differentiation,GO:0043065-positive regulation of apoptotic process,GO:0048691-positive regulation of axon extension involved in regeneration,GO:0050927-positive regulation of positive chemotaxis,GO:0051965-positive regulation of synapse assembly,GO:0070306-lens fiber cell differentiation,GO:0090630-activation of GTPase activity,GO:2000251-positive regulation of actin cytoskeleton reorganization,                                                                                                                                                                                                                                                                                                                                                                                                                                                                                                                                                                                                                                                                                                                                                                                                                                                                                                                |
| DistUt | UP   | RNF167       | ring finger protein 167(RNF167)                                                         | GO:0000209-protein polyubiquitination,GO:0045786-negative regulation of cell cycle,                                                                                                                                                                                                                                                                                                                                                                                                                                                                                                                                                                                                                                                                                                                                                                                                                                                                                                                                                                                                                                                                                                                                                                                                                                                                                                                                                                                                                                                                                                                                                                                                                                                                                                                                                                                                                                                                                                                                                       |
| DistUt | UP   | AAR2         | AAR2 splicing factor homolog(AAR2)                                                      | GO:0000244-spliceosomal tri-snRNP complex assembly,                                                                                                                                                                                                                                                                                                                                                                                                                                                                                                                                                                                                                                                                                                                                                                                                                                                                                                                                                                                                                                                                                                                                                                                                                                                                                                                                                                                                                                                                                                                                                                                                                                                                                                                                                                                                                                                                                                                                                                                       |
| DistUt | UP   | DHX32        | DEAH-box helicase 32 (putative)(DHX32)                                                  | GO:0000398-mRNA splicing, via spliceosome,                                                                                                                                                                                                                                                                                                                                                                                                                                                                                                                                                                                                                                                                                                                                                                                                                                                                                                                                                                                                                                                                                                                                                                                                                                                                                                                                                                                                                                                                                                                                                                                                                                                                                                                                                                                                                                                                                                                                                                                                |
| DistUt | UP   | WN17A        | Wnt family member 7A(WN17A)                                                             | GO:0000578-embryonic axis specification,GO:0001502-cartilage condensation,GO:0001525-angiogenesis,GO:0002062-chondrocyte differentiation,GO:0007269-neurotransmitter secretion,GO:0008105-asymmetric protein localization,GO:0009953-dorsal/ventral pattern formation,GO:0010595-positive regulation of endothelial cell migration,GO:0014719-skeletal muscle satellite cell activation,GO:0014834-skeletal muscle satellite cell maintenance involved in skeletal muscle regeneration,GO:0016055-Wnt signaling pathway,GO:0021707-cerebellar granule cell differentiation,GO:0021846-cell proliferation in forebrain,GO:0022009-central nervous system vasculogenesis,GO:0030010-establishment of cell polarity,GO:0030182-neuron differentiation,GO:0031133-regulation of axon diameter,GO:0035019-somatic stem cell population maintenance,GO:0035115-embryonic forelimb morphogenesis,GO:0035116-embryonic hindlimb morphogenesis,GO:0035567-non-canonical Wnt signaling pathway,GO:0035659-Wnt signaling pathway involved in wound healing, spreading of epidermal cells,GO:0042733-embryonic digit morphogenesis,GO:0043066-negative regulation of apoptotic process,GO:0043627-response to estrogen,GO:0045165-cell fate commitment,GO:0045944-positive regulation of transcription from RNA polymerase II promoter,GO:0048103-somatic stem cell division,GO:0048864-stem cell development,GO:0050768-negative regulation of neurogenesis,GO:0050808-synapse organization,GO:0060021-palate development,GO:0060054-positive regulation of epithelial cell proliferation involved in wound healing,GO:0060066-oviduct development,GO:0060070-canonical Wnt signaling pathway,GO:0060997-dendritic spine morphogenesis,GO:0061038-uterus morphogenesis,GO:0071560-cellular response to transforming growth factor beta stimulus,GO:0090263-positive regulation of canonical Wnt signaling pathway,GO:1904891-positive regulation of excitatory synapse assembly,GO:2000463-positive regulation of excitatory postsynaptic potential, |
| DistUt | UP   | SLC7A7       | solute carrier family 7 member 7(SLC7A7)                                                | GO:0000821-regulation of arginine metabolic process,                                                                                                                                                                                                                                                                                                                                                                                                                                                                                                                                                                                                                                                                                                                                                                                                                                                                                                                                                                                                                                                                                                                                                                                                                                                                                                                                                                                                                                                                                                                                                                                                                                                                                                                                                                                                                                                                                                                                                                                      |

|        |    |          |                                                               |                                                                                                                                                                                                                                                                                                                                                                                                                                                                                                                                                                                                                                                                                                                                                                                                                                                                                                                                                                                                                                                                                                                                                                                                                                                                                                                                                                                                                                                                                                                                                   |
|--------|----|----------|---------------------------------------------------------------|---------------------------------------------------------------------------------------------------------------------------------------------------------------------------------------------------------------------------------------------------------------------------------------------------------------------------------------------------------------------------------------------------------------------------------------------------------------------------------------------------------------------------------------------------------------------------------------------------------------------------------------------------------------------------------------------------------------------------------------------------------------------------------------------------------------------------------------------------------------------------------------------------------------------------------------------------------------------------------------------------------------------------------------------------------------------------------------------------------------------------------------------------------------------------------------------------------------------------------------------------------------------------------------------------------------------------------------------------------------------------------------------------------------------------------------------------------------------------------------------------------------------------------------------------|
| DistUt | UP | TENM2    | teneurin transmembrane protein 2(TENM2)                       | GO:000902-cell morphogenesis,GO:0007157-heterophilic cell-cell adhesion via plasma membrane cell adhesion molecules,GO:0007165-signal transduction,GO:0048666-neuron development,GO:0097264-self proteolysis,                                                                                                                                                                                                                                                                                                                                                                                                                                                                                                                                                                                                                                                                                                                                                                                                                                                                                                                                                                                                                                                                                                                                                                                                                                                                                                                                     |
| DistUt | UP | CAP2     | CAP, adenylate cyclase-associated protein, 2 (yeast)(CAP2)    | GO:000902-cell morphogenesis,GO:0007163-establishment or maintenance of cell polarity,GO:0007165-signal transduction,GO:0008154-actin polymerization or depolymerization,GO:0045761-regulation of adenylate cyclase activity,                                                                                                                                                                                                                                                                                                                                                                                                                                                                                                                                                                                                                                                                                                                                                                                                                                                                                                                                                                                                                                                                                                                                                                                                                                                                                                                     |
| DistUt | UP | PLXDC1   | plexin domain containing 1(PLXDC1)                            | GO:001525-angiogenesis,                                                                                                                                                                                                                                                                                                                                                                                                                                                                                                                                                                                                                                                                                                                                                                                                                                                                                                                                                                                                                                                                                                                                                                                                                                                                                                                                                                                                                                                                                                                           |
| DistUt | UP | VEGFB    | vascular endothelial growth factor B(VEGFB)                   | GO:001525-angiogenesis,GO:0001666-response to hypoxia,GO:0001938-positive regulation of endothelial cell proliferation,GO:0006493-protein O-linked glycosylation,GO:0045766-positive regulation of angiogenesis,GO:0048010-vascular endothelial growth factor receptor signaling pathway,GO:0050930-induction of positive chemotaxis,GO:0060048-cardiac muscle contraction,GO:0060754-positive regulation of mast cell chemotaxis,GO:0060976-coronary vasculature development,                                                                                                                                                                                                                                                                                                                                                                                                                                                                                                                                                                                                                                                                                                                                                                                                                                                                                                                                                                                                                                                                    |
| DistUt | UP | POFUT1   | protein O-fucosyltransferase 1(POFUT1)                        | GO:001525-angiogenesis,GO:0001756-somitogenesis,GO:0006493-protein O-linked glycosylation,GO:0007219-Notch signaling pathway,GO:0007399-nervous system development,GO:0007507-heart development,                                                                                                                                                                                                                                                                                                                                                                                                                                                                                                                                                                                                                                                                                                                                                                                                                                                                                                                                                                                                                                                                                                                                                                                                                                                                                                                                                  |
| DistUt | UP | UBP1     | upstream binding protein 1 (LBP-1a)(UBP1)                     | GO:001525-angiogenesis,GO:0006357-regulation of transcription from RNA polymerase II promoter,                                                                                                                                                                                                                                                                                                                                                                                                                                                                                                                                                                                                                                                                                                                                                                                                                                                                                                                                                                                                                                                                                                                                                                                                                                                                                                                                                                                                                                                    |
| DistUt | UP | CDC25B   | cell division cycle 25B(CDC25B)                               | GO:001556-oocyte maturation,GO:0006468-protein phosphorylation,GO:0007144-female meiosis I,GO:0032467-positive regulation of cytokinesis,GO:0045860-positive regulation of protein kinase activity,GO:0045931-positive regulation of mitotic cell cycle,GO:0051301-cell division,                                                                                                                                                                                                                                                                                                                                                                                                                                                                                                                                                                                                                                                                                                                                                                                                                                                                                                                                                                                                                                                                                                                                                                                                                                                                 |
| DistUt | UP | CUL4A    | cullin 4A(CUL4A)                                              | GO:0001701-in utero embryonic development,GO:0006974-cellular response to DNA damage stimulus,GO:0008284-positive regulation of cell proliferation,GO:0030097-hemopoiesis,GO:0030853-negative regulation of granulocyte differentiation,GO:0035019-somatic stem cell population maintenance,GO:0042787-protein ubiquitination involved in ubiquitin-dependent protein catabolic process,GO:0043161-proteasome-mediated ubiquitin-dependent protein catabolic process,GO:0051246-regulation of protein metabolic process,GO:1900087-positive regulation of G1/S transition of mitotic cell cycle,GO:2000001-regulation of DNA damage checkpoint,GO:2000819-regulation of nucleotide-excision repair,                                                                                                                                                                                                                                                                                                                                                                                                                                                                                                                                                                                                                                                                                                                                                                                                                                               |
| DistUt | UP | FCGR1A   | Fc fragment of IgG, high affinity Ia, receptor (CD64)(FCGR1A) | GO:0001788-antibody-dependent cellular cytotoxicity,GO:0001798-positive regulation of type II hypersensitivity,GO:0001805-positive regulation of type III hypersensitivity,GO:0006898-receptor-mediated endocytosis,GO:0006910-phagocytosis, recognition,GO:0006911-phagocytosis, engulfment,GO:0042590-antigen processing and presentation of exogenous peptide antigen via MHC class I,GO:0042742-defense response to bacterium,GO:0050766-positive regulation of phagocytosis,                                                                                                                                                                                                                                                                                                                                                                                                                                                                                                                                                                                                                                                                                                                                                                                                                                                                                                                                                                                                                                                                 |
| DistUt | UP | ADRA2A   | adrenoceptor alpha 2A(ADRA2A)                                 | GO:0001819-positive regulation of cytokine production,GO:0006940-regulation of smooth muscle contraction,GO:0007194-negative regulation of adenylate cyclase activity,GO:0007267-cell-cell signaling,GO:0019229-regulation of vasoconstriction,GO:0030168-platelet activation,GO:0030335-positive regulation of cell migration,GO:0030818-negative regulation of cAMP biosynthetic process,GO:0032148-activation of protein kinase B activity,GO:0032870-cellular response to hormone stimulus,GO:0035625-epidermal growth factor-activated receptor transactivation by G-protein coupled receptor signaling pathway,GO:0042593-glucose homeostasis,GO:0043268-positive regulation of potassium ion transport,GO:0050995-negative regulation of lipid catabolic process,GO:0051044-positive regulation of membrane protein ectodomain proteolysis,GO:0051926-negative regulation of calcium ion transport,GO:0061179-negative regulation of insulin secretion involved in cellular response to glucose stimulus,GO:0071878-negative regulation of adrenergic receptor signaling pathway,GO:0071880-adenylate cyclase-activating adrenergic receptor signaling pathway,GO:0071881-adenylate cyclase-inhibiting adrenergic receptor signaling pathway,GO:0071882-phospholipase C-activating adrenergic receptor signaling pathway,GO:0071883-activation of MAPK activity by adrenergic receptor signaling pathway,GO:0090303-positive regulation of wound healing,GO:1901020-negative regulation of calcium ion transmembrane transporter activity, |
| DistUt | UP | HSP90AB1 | heat shock protein 90 alpha family class B member 1(HSP90AB1) | GO:0001890-placenta development,GO:0006457-protein folding,GO:0006950-response to stress,GO:0019062-virion attachment to host cell,GO:0031396-regulation of protein ubiquitination,GO:0032435-negative regulation of proteasomal ubiquitin-dependent protein catabolic process,GO:0043066-negative regulation of apoptotic process,GO:0060334-regulation of interferon-gamma-mediated signaling pathway,GO:0060338-regulation of type I interferon-mediated signaling pathway,GO:0071353-cellular response to interleukin-4,GO:0097435-fibril organization,                                                                                                                                                                                                                                                                                                                                                                                                                                                                                                                                                                                                                                                                                                                                                                                                                                                                                                                                                                                       |
| DistUt | UP | ARRB2    | arrestin beta 2(ARRB2)                                        | GO:0002031-G-protein coupled receptor internalization,GO:0002032-desensitization of G-protein coupled receptor protein signaling pathway by arrestin,GO:0002092-positive regulation of receptor internalization,GO:0006366-transcription from RNA polymerase II promoter,GO:0007179-transforming growth factor beta receptor signaling pathway,GO:0007628-adult walking behavior,GO:0016567-protein ubiquitination,GO:0031397-negative regulation of protein ubiquitination,GO:0031398-positive regulation of protein ubiquitination,GO:0032088-negative regulation of NF-kappaB transcription factor activity,GO:0032226-positive regulation of synaptic transmission, dopaminergic,GO:0032691-negative regulation of interleukin-1 beta production,GO:0032695-negative regulation of interleukin-12 production,GO:0032715-negative regulation of interleukin-6 production,GO:0032720-negative regulation of tumor necrosis factor production,GO:0034122-negative regulation of toll-like receptor signaling pathway,GO:0043161-proteasome-mediated ubiquitin-dependent protein catabolic process,GO:0045953-negative regulation of natural killer cell mediated cytotoxicity,GO:0051897-positive regulation of protein kinase B signaling,GO:0060326-cell chemotaxis,GO:0060765-regulation of androgen receptor signaling pathway,GO:0070374-positive regulation of ERK1 and ERK2 cascade,                                                                                                                                                      |
| DistUt | UP | UNC13D   | unc-13 homolog D(UNC13D)                                      | GO:002432-granuloma formation,GO:002467-germinal center formation,GO:0006909-phagocytosis,GO:0043304-regulation of mast cell degranulation,GO:0043320-natural killer cell degranulation,GO:0051607-defense response to virus,GO:1900026-positive regulation of substrate adhesion-dependent cell spreading,GO:1903307-positive regulation of regulated secretory pathway,                                                                                                                                                                                                                                                                                                                                                                                                                                                                                                                                                                                                                                                                                                                                                                                                                                                                                                                                                                                                                                                                                                                                                                         |
| DistUt | UP | DHRS3    | dehydrogenase/reductase 3(DHRS3)                              | GO:0003151-outflow tract morphogenesis,GO:0030278-regulation of ossification,GO:0042572-retinol metabolic process,GO:0048387-negative regulation of retinoic acid receptor signaling pathway,GO:0060021-palate development,GO:0060349-bone morphogenesis,GO:0060411-cardiac septum morphogenesis,                                                                                                                                                                                                                                                                                                                                                                                                                                                                                                                                                                                                                                                                                                                                                                                                                                                                                                                                                                                                                                                                                                                                                                                                                                                 |
| DistUt | UP | GNMT     | glycine N-methyltransferase(GNMT)                             | GO:005977-glycogen metabolic process,GO:0006111-regulation of gluconeogenesis,GO:0006555-methionine metabolic process,GO:0006730-one-carbon metabolic process,GO:0032259-methylation,GO:0046500-S-adenosylmethionine metabolic process,GO:0051289-protein homotetramerization,                                                                                                                                                                                                                                                                                                                                                                                                                                                                                                                                                                                                                                                                                                                                                                                                                                                                                                                                                                                                                                                                                                                                                                                                                                                                    |
| DistUt | UP | ALDH2    | aldehyde dehydrogenase 2 family (mitochondrial)(ALDH2)        | GO:0006068-ethanol catabolic process,GO:0055114-oxidation-reduction process,                                                                                                                                                                                                                                                                                                                                                                                                                                                                                                                                                                                                                                                                                                                                                                                                                                                                                                                                                                                                                                                                                                                                                                                                                                                                                                                                                                                                                                                                      |
| DistUt | UP | FMO2     | flavin containing monooxygenase 2(FMO2)                       | GO:0006082-organic acid metabolic process,GO:0006805-xenobiotic metabolic process,GO:0009404-toxin metabolic process,GO:0017144-drug metabolic process,GO:0055114-oxidation-reduction process,GO:0070995-NADPH oxidation,GO:0072592-oxygen metabolic process,                                                                                                                                                                                                                                                                                                                                                                                                                                                                                                                                                                                                                                                                                                                                                                                                                                                                                                                                                                                                                                                                                                                                                                                                                                                                                     |
| DistUt | UP | IDH3G    | isocitrate dehydrogenase 3 (NAD(+)) gamma(IDH3G)              | GO:0006099-tricarboxylic acid cycle,GO:0006102-isocitrate metabolic process,                                                                                                                                                                                                                                                                                                                                                                                                                                                                                                                                                                                                                                                                                                                                                                                                                                                                                                                                                                                                                                                                                                                                                                                                                                                                                                                                                                                                                                                                      |
| DistUt | UP | NDUFA10  | NADH:ubiquinone oxidoreductase subunit A10(NDUFA10)           | GO:0006120-mitochondrial electron transport, NADH to ubiquinone,                                                                                                                                                                                                                                                                                                                                                                                                                                                                                                                                                                                                                                                                                                                                                                                                                                                                                                                                                                                                                                                                                                                                                                                                                                                                                                                                                                                                                                                                                  |
| DistUt | UP | GMPR     | guanosine monophosphate reductase(GMPR)                       | GO:0006144-purine nucleobase metabolic process,GO:0015951-purine ribonucleotide interconversion,                                                                                                                                                                                                                                                                                                                                                                                                                                                                                                                                                                                                                                                                                                                                                                                                                                                                                                                                                                                                                                                                                                                                                                                                                                                                                                                                                                                                                                                  |
| DistUt | UP | ALDH6A1  | aldehyde dehydrogenase 6 family member A1(ALDH6A1)            | GO:0006210-thymine catabolic process,GO:0006574-valine catabolic process,GO:0050873-brown fat cell differentiation,                                                                                                                                                                                                                                                                                                                                                                                                                                                                                                                                                                                                                                                                                                                                                                                                                                                                                                                                                                                                                                                                                                                                                                                                                                                                                                                                                                                                                               |
| DistUt | UP | TET3     | tet methylcytosine dioxygenase 3(TET3)                        | GO:0006211-5-methylcytosine catabolic process,GO:0006493-protein O-linked glycosylation,GO:0044727-DNA demethylation of male pronucleus,GO:0045944-positive regulation of transcription from RNA polymerase II promoter,GO:0070989-oxidative demethylation,GO:0080111-DNA demethylation,GO:0080182-histone H3-K4 trimethylation,                                                                                                                                                                                                                                                                                                                                                                                                                                                                                                                                                                                                                                                                                                                                                                                                                                                                                                                                                                                                                                                                                                                                                                                                                  |
| DistUt | UP | TDP1     | tyrosyl-DNA phosphodiesterase 1(TDP1)                         | GO:0006281-DNA repair,                                                                                                                                                                                                                                                                                                                                                                                                                                                                                                                                                                                                                                                                                                                                                                                                                                                                                                                                                                                                                                                                                                                                                                                                                                                                                                                                                                                                                                                                                                                            |
| DistUt | UP | POLR1D   | RNA polymerase I subunit D(POLR1D)                            | GO:0006351-transcription, DNA-templated,GO:0006360-transcription from RNA polymerase I promoter,GO:0006383-transcription from RNA polymerase III promoter,                                                                                                                                                                                                                                                                                                                                                                                                                                                                                                                                                                                                                                                                                                                                                                                                                                                                                                                                                                                                                                                                                                                                                                                                                                                                                                                                                                                        |
| DistUt | UP | TBL1X    | transducin beta like 1X-linked(TBL1X)                         | GO:0006357-regulation of transcription from RNA polymerase II promoter,GO:0016575-histone deacetylation,GO:0043161-proteasome-mediated ubiquitin-dependent protein catabolic process,GO:0043627-response to estrogen,GO:0045444-fat cell differentiation,GO:0045892-negative regulation of transcription, DNA-templated,GO:0045944-positive regulation of transcription from RNA polymerase II promoter,GO:0048545-response to steroid hormone,                                                                                                                                                                                                                                                                                                                                                                                                                                                                                                                                                                                                                                                                                                                                                                                                                                                                                                                                                                                                                                                                                                   |
| DistUt | UP | POLR1A   | RNA polymerase I subunit A(POLR1A)                            | GO:0006360-transcription from RNA polymerase I promoter,                                                                                                                                                                                                                                                                                                                                                                                                                                                                                                                                                                                                                                                                                                                                                                                                                                                                                                                                                                                                                                                                                                                                                                                                                                                                                                                                                                                                                                                                                          |
| DistUt | UP | PDF      | peptide deformylase (mitochondrial)(PDF)                      | GO:0006412-translation,GO:0008284-positive regulation of cell proliferation,GO:0018206-peptidyl-methionine modification,GO:0031365-N-terminal protein amino acid modification,                                                                                                                                                                                                                                                                                                                                                                                                                                                                                                                                                                                                                                                                                                                                                                                                                                                                                                                                                                                                                                                                                                                                                                                                                                                                                                                                                                    |
| DistUt | UP | TRAP1    | TNF receptor associated protein 1(TRAP1)                      | GO:0006457-protein folding,GO:0006950-response to stress,GO:0009386-translational attenuation,GO:1901856-negative regulation of cellular respiration,                                                                                                                                                                                                                                                                                                                                                                                                                                                                                                                                                                                                                                                                                                                                                                                                                                                                                                                                                                                                                                                                                                                                                                                                                                                                                                                                                                                             |

|        |    |              |                                                                                 |                                                                                                                                                                                                                                                                                                                                                                                                                                                                                                                                                                                                                                                                                                                                                                                                                                                                                                                                                                                                                                                                                                                                                                                      |
|--------|----|--------------|---------------------------------------------------------------------------------|--------------------------------------------------------------------------------------------------------------------------------------------------------------------------------------------------------------------------------------------------------------------------------------------------------------------------------------------------------------------------------------------------------------------------------------------------------------------------------------------------------------------------------------------------------------------------------------------------------------------------------------------------------------------------------------------------------------------------------------------------------------------------------------------------------------------------------------------------------------------------------------------------------------------------------------------------------------------------------------------------------------------------------------------------------------------------------------------------------------------------------------------------------------------------------------|
| DistUt | UP | HSPE1        | heat shock protein family E (Hsp10) member 1(HSPE1)                             | GO:0006457-protein folding,GO:0006986-response to unfolded protein,GO:0051085-chaperone mediated protein folding requiring cofactor,                                                                                                                                                                                                                                                                                                                                                                                                                                                                                                                                                                                                                                                                                                                                                                                                                                                                                                                                                                                                                                                 |
| DistUt | UP | DGUOK        | deoxyguanosine kinase(DGUOK)                                                    | GO:0006468-protein phosphorylation,GO:0046070-dGTP metabolic process,GO:0046122-purine deoxyribonucleoside metabolic process,                                                                                                                                                                                                                                                                                                                                                                                                                                                                                                                                                                                                                                                                                                                                                                                                                                                                                                                                                                                                                                                        |
| DistUt | UP | CAPN15       | calpain 15(CAPN15)                                                              | GO:0006508-proteolysis,                                                                                                                                                                                                                                                                                                                                                                                                                                                                                                                                                                                                                                                                                                                                                                                                                                                                                                                                                                                                                                                                                                                                                              |
| DistUt | UP | CAPN5        | calpain 5(CAPN5)                                                                | GO:0006508-proteolysis,                                                                                                                                                                                                                                                                                                                                                                                                                                                                                                                                                                                                                                                                                                                                                                                                                                                                                                                                                                                                                                                                                                                                                              |
| DistUt | UP | FAH          | fumarylacetoacetate hydrolase(FAH)                                              | GO:0006527-arginine catabolic process,GO:0009072-aromatic amino acid family metabolic process,                                                                                                                                                                                                                                                                                                                                                                                                                                                                                                                                                                                                                                                                                                                                                                                                                                                                                                                                                                                                                                                                                       |
| DistUt | UP | HADH         | hydroxyacyl-CoA dehydrogenase(HADH)                                             | GO:0006635-fatty acid beta-oxidation,                                                                                                                                                                                                                                                                                                                                                                                                                                                                                                                                                                                                                                                                                                                                                                                                                                                                                                                                                                                                                                                                                                                                                |
| DistUt | UP | CHKA         | choline kinase alpha(CHKA)                                                      | GO:0006646-phosphatidylethanolamine biosynthetic process,                                                                                                                                                                                                                                                                                                                                                                                                                                                                                                                                                                                                                                                                                                                                                                                                                                                                                                                                                                                                                                                                                                                            |
| DistUt | UP | PLD2         | phospholipase D2(PLD2)                                                          | GO:0006654-phosphatidic acid biosynthetic process,GO:0036465-synaptic vesicle recycling,GO:0048017-inositol lipid-mediated signaling,GO:0048870-cell motility,                                                                                                                                                                                                                                                                                                                                                                                                                                                                                                                                                                                                                                                                                                                                                                                                                                                                                                                                                                                                                       |
| DistUt | UP | SPR          | sepiapterin reductase (7,8-dihydrobiopterin:NADP+ oxidoreductase)(SPR)          | GO:0006729-tetrahydrobiopterin biosynthetic process,GO:0006809-nitric oxide biosynthetic process,                                                                                                                                                                                                                                                                                                                                                                                                                                                                                                                                                                                                                                                                                                                                                                                                                                                                                                                                                                                                                                                                                    |
| DistUt | UP | PCBD1        | pterin-4 alpha-carbinolamine dehydratase 1(PCBD1)                               | GO:0006729-tetrahydrobiopterin biosynthetic process,GO:0051289-protein homotetramerization,GO:0051291-protein heterooligomerization,                                                                                                                                                                                                                                                                                                                                                                                                                                                                                                                                                                                                                                                                                                                                                                                                                                                                                                                                                                                                                                                 |
| DistUt | UP | COQ4         | coenzyme Q4(COQ4)                                                               | GO:0006744-ubiquinone biosynthetic process,                                                                                                                                                                                                                                                                                                                                                                                                                                                                                                                                                                                                                                                                                                                                                                                                                                                                                                                                                                                                                                                                                                                                          |
| DistUt | UP | GSTK1        | glutathione S-transferase kappa 1(GSTK1)                                        | GO:0006749-glutathione metabolic process,GO:0030855-epithelial cell differentiation,                                                                                                                                                                                                                                                                                                                                                                                                                                                                                                                                                                                                                                                                                                                                                                                                                                                                                                                                                                                                                                                                                                 |
| DistUt | UP | LOC100624445 | gamma-glutamylcyclotransferase-like(LOC100624445)                               | GO:0006750-glutathione biosynthetic process,                                                                                                                                                                                                                                                                                                                                                                                                                                                                                                                                                                                                                                                                                                                                                                                                                                                                                                                                                                                                                                                                                                                                         |
| DistUt | UP | SLC35F1      | solute carrier family 35 member F1(SLC35F1)                                     | GO:0006810-transport,                                                                                                                                                                                                                                                                                                                                                                                                                                                                                                                                                                                                                                                                                                                                                                                                                                                                                                                                                                                                                                                                                                                                                                |
| DistUt | UP | ABCA9        | ATP binding cassette subfamily A member 9(ABCA9)                                | GO:0006869-lipid transport,                                                                                                                                                                                                                                                                                                                                                                                                                                                                                                                                                                                                                                                                                                                                                                                                                                                                                                                                                                                                                                                                                                                                                          |
| DistUt | UP | ATP2C2       | ATPase secretory pathway Ca2+ transporting 2(ATP2C2)                            | GO:0006874-cellular calcium ion homeostasis,GO:0061180-mammary gland epithelium development,GO:0072661-protein targeting to plasma membrane,GO:0090280-positive regulation of calcium ion import,                                                                                                                                                                                                                                                                                                                                                                                                                                                                                                                                                                                                                                                                                                                                                                                                                                                                                                                                                                                    |
| DistUt | UP | STX10        | syntaxin 10(STX10)                                                              | GO:0006886-intraacellular protein transport,GO:0006906-vesicle fusion,GO:0032880-regulation of protein localization,GO:0042147-retrograde transport, endosome to Golgi,GO:0048193-Golgi vesicle transport,GO:0048278-vesicle docking,                                                                                                                                                                                                                                                                                                                                                                                                                                                                                                                                                                                                                                                                                                                                                                                                                                                                                                                                                |
| DistUt | UP | MAP4K2       | mitogen-activated protein kinase kinase kinase 2(MAP4K2)                        | GO:0006903-vesicle targeting,GO:0007257-activation of JUN kinase activity,                                                                                                                                                                                                                                                                                                                                                                                                                                                                                                                                                                                                                                                                                                                                                                                                                                                                                                                                                                                                                                                                                                           |
| DistUt | UP | CYFIP2       | cytoplasmic FMR1 interacting protein 2(CYFIP2)                                  | GO:0006915-apoptotic process,GO:0016337-single organismal cell-cell adhesion,GO:0097202-activation of cysteine-type endopeptidase activity,                                                                                                                                                                                                                                                                                                                                                                                                                                                                                                                                                                                                                                                                                                                                                                                                                                                                                                                                                                                                                                          |
| DistUt | UP | LOC100153966 | activator of 90 kDa heat shock protein ATPase homolog 1(LOC100153966)           | GO:0006950-response to stress,                                                                                                                                                                                                                                                                                                                                                                                                                                                                                                                                                                                                                                                                                                                                                                                                                                                                                                                                                                                                                                                                                                                                                       |
| DistUt | UP | STRIP2       | striatin interacting protein 2(STRIP2)                                          | GO:0007010-cytoskeleton organization,GO:0008360-regulation of cell shape,GO:0016477-cell migration,                                                                                                                                                                                                                                                                                                                                                                                                                                                                                                                                                                                                                                                                                                                                                                                                                                                                                                                                                                                                                                                                                  |
| DistUt | UP | MSLN         | mesothelin(MSLN)                                                                | GO:0007160-cell-matrix adhesion,                                                                                                                                                                                                                                                                                                                                                                                                                                                                                                                                                                                                                                                                                                                                                                                                                                                                                                                                                                                                                                                                                                                                                     |
| DistUt | UP | LRRC1        | leucine rich repeat containing 1(LRRC1)                                         | GO:0007165-signal transduction,GO:0032088-negative regulation of NF-kappaB transcription factor activity,                                                                                                                                                                                                                                                                                                                                                                                                                                                                                                                                                                                                                                                                                                                                                                                                                                                                                                                                                                                                                                                                            |
| DistUt | UP | CSF1R        | colony stimulating factor 1 receptor(CSF1R)                                     | GO:0007169-transmembrane receptor protein tyrosine kinase signaling pathway,GO:0007411-axon guidance,GO:0008283-cell proliferation,GO:0008284-positive regulation of cell proliferation,GO:0008285-negative regulation of cell proliferation,GO:0008360-regulation of cell shape,GO:0019221-cytokine-mediated signaling pathway,GO:0021772-olfactory bulb development,GO:0021879-forebrain neuron differentiation,GO:0030316-osteodast differentiation,GO:0030335-positive regulation of cell migration,GO:0031529-nuffle organization,GO:0042517-positive regulation of tyrosine phosphorylation of Stat3 protein,GO:0043066-negative regulation of apoptotic process,GO:0045217-cell-cell junction maintenance,GO:0046488-phosphatidylinositol metabolic process,GO:0046777-protein autophosphorylation,GO:0048015-phosphatidylinositol-mediated signaling,GO:0061098-positive regulation of protein tyrosine kinase activity,GO:0070374-positive regulation of ERK1 and ERK2 cascade,GO:0071902-positive regulation of protein serine/threonine kinase activity,GO:0090197-positive regulation of chemokine secretion,GO:2000249-regulation of actin cytoskeleton reorganization, |
| DistUt | UP | LOC100152489 | olfactory receptor 13C8(LOC100152489)                                           | GO:0007186-G-protein coupled receptor signaling pathway,GO:0007608-sensory perception of smell,                                                                                                                                                                                                                                                                                                                                                                                                                                                                                                                                                                                                                                                                                                                                                                                                                                                                                                                                                                                                                                                                                      |
| DistUt | UP | KRT19        | keratin 19(KRT19)                                                               | GO:0007219-Notch signaling pathway,GO:0043627-response to estrogen,GO:0045214-sarcomere organization,GO:0060706-cell differentiation involved in embryonic placenta development,                                                                                                                                                                                                                                                                                                                                                                                                                                                                                                                                                                                                                                                                                                                                                                                                                                                                                                                                                                                                     |
| DistUt | UP | CACNB2       | calcium voltage-gated channel auxiliary subunit beta 2(CACNB2)                  | GO:0007268-chemical synaptic transmission,GO:0007528-neuromuscular junction development,GO:0007601-visual perception,GO:0051928-positive regulation of calcium ion transport,GO:0070509-calcium ion import,GO:0086091-regulation of heart rate by cardiac conduction,GO:0098912-membrane depolarization during atrial cardiac muscle cell action potential,GO:1901385-regulation of voltage-gated calcium channel activity,                                                                                                                                                                                                                                                                                                                                                                                                                                                                                                                                                                                                                                                                                                                                                          |
| DistUt | UP | LOC100513474 | platelet-activating factor acetylhydrolase 1B subunit gamma(LOC100513474)       | GO:0007420-brain development,                                                                                                                                                                                                                                                                                                                                                                                                                                                                                                                                                                                                                                                                                                                                                                                                                                                                                                                                                                                                                                                                                                                                                        |
| DistUt | UP | GABRB2       | gamma-aminobutyric acid type A receptor beta2 subunit(GABRB2)                   | GO:0007605-sensory perception of sound,GO:0043524-negative regulation of neuron apoptotic process,GO:0060119-inner ear receptor cell development,GO:0060384-innervation,GO:0090102-cochlea development,                                                                                                                                                                                                                                                                                                                                                                                                                                                                                                                                                                                                                                                                                                                                                                                                                                                                                                                                                                              |
| DistUt | UP | NDUFV1       | NADH:ubiquinone oxidoreductase core subunit V1(NDUFV1)                          | GO:0009060-aerobic respiration,                                                                                                                                                                                                                                                                                                                                                                                                                                                                                                                                                                                                                                                                                                                                                                                                                                                                                                                                                                                                                                                                                                                                                      |
| DistUt | UP | PRPSAP1      | phosphoribosyl pyrophosphate synthetase associated protein 1(PRPSAP1)           | GO:0009116-nucleoside metabolic process,GO:0009165-nucleotide biosynthetic process,                                                                                                                                                                                                                                                                                                                                                                                                                                                                                                                                                                                                                                                                                                                                                                                                                                                                                                                                                                                                                                                                                                  |
| DistUt | UP | AQP9         | aquaporin 9(AQP9)                                                               | GO:0009992-cellular water homeostasis,GO:0015837-amine transport,GO:0034220-ion transmembrane transport,GO:0046689-response to mercury ion,GO:0071320-cellular response to cAMP,GO:0071918-urea transmembrane transport,                                                                                                                                                                                                                                                                                                                                                                                                                                                                                                                                                                                                                                                                                                                                                                                                                                                                                                                                                             |
| DistUt | UP | CEP68        | centrosomal protein 68(CEP68)                                                   | GO:0010457-centriole-centriole cohesion,GO:0033365-protein localization to organelle,                                                                                                                                                                                                                                                                                                                                                                                                                                                                                                                                                                                                                                                                                                                                                                                                                                                                                                                                                                                                                                                                                                |
| DistUt | UP | NCKIPSD      | NCK interacting protein with SH3 domain(NCKIPSD)                                | GO:0010976-positive regulation of neuron projection development,                                                                                                                                                                                                                                                                                                                                                                                                                                                                                                                                                                                                                                                                                                                                                                                                                                                                                                                                                                                                                                                                                                                     |
| DistUt | UP | STARD10      | STAR related lipid transfer domain containing 10(STARD10)                       | GO:0015914-phospholipid transport,GO:0032782-bile acid secretion,GO:0035360-positive regulation of peroxisome proliferator activated receptor signaling pathway,                                                                                                                                                                                                                                                                                                                                                                                                                                                                                                                                                                                                                                                                                                                                                                                                                                                                                                                                                                                                                     |
| DistUt | UP | ATP5E        | ATP synthase, H+ transporting, mitochondrial F1 complex, epsilon subunit(ATP5E) | GO:0015986-ATP synthesis coupled proton transport,                                                                                                                                                                                                                                                                                                                                                                                                                                                                                                                                                                                                                                                                                                                                                                                                                                                                                                                                                                                                                                                                                                                                   |
| DistUt | UP | ANXA9        | annexin A9(ANXA9)                                                               | GO:0016337-single organismal cell-cell adhesion,                                                                                                                                                                                                                                                                                                                                                                                                                                                                                                                                                                                                                                                                                                                                                                                                                                                                                                                                                                                                                                                                                                                                     |
| DistUt | UP | GPA33        | glycoprotein A33(GPA33)                                                         | GO:0016337-single organismal cell-cell adhesion,                                                                                                                                                                                                                                                                                                                                                                                                                                                                                                                                                                                                                                                                                                                                                                                                                                                                                                                                                                                                                                                                                                                                     |
| DistUt | UP | RNF4         | ring finger protein 4(RNF4)                                                     | GO:0016567-protein ubiquitination,GO:0033234-negative regulation of protein sumoylation,GO:0043161-proteasome-mediated ubiquitin-dependent protein catabolic process,GO:0045944-positive regulation of transcription from RNA polymerase II promoter,GO:0046685-response to arsenic-containing substance,GO:0090169-regulation of spindle assembly,GO:0090234-regulation of kinetochore assembly,                                                                                                                                                                                                                                                                                                                                                                                                                                                                                                                                                                                                                                                                                                                                                                                    |
| DistUt | UP | NIPSNAP1     | nipsnap homolog 1 (C. elegans)(NIPSNAP1)                                        | GO:0019233-sensory perception of pain,                                                                                                                                                                                                                                                                                                                                                                                                                                                                                                                                                                                                                                                                                                                                                                                                                                                                                                                                                                                                                                                                                                                                               |

|        |      |              |                                                                       |                                                                                                                                                                                                                                                                                                                                                                                                                                                                                                                                                                                                                                                                                                                                                                                                                                                                                                                                                                                                                                                                                                                                                                                                                                                                                                                                                                                                                                                                                                                                                                                                                                                                                                                                                                                                                                                                                                                                                                                                                                                                                            |
|--------|------|--------------|-----------------------------------------------------------------------|--------------------------------------------------------------------------------------------------------------------------------------------------------------------------------------------------------------------------------------------------------------------------------------------------------------------------------------------------------------------------------------------------------------------------------------------------------------------------------------------------------------------------------------------------------------------------------------------------------------------------------------------------------------------------------------------------------------------------------------------------------------------------------------------------------------------------------------------------------------------------------------------------------------------------------------------------------------------------------------------------------------------------------------------------------------------------------------------------------------------------------------------------------------------------------------------------------------------------------------------------------------------------------------------------------------------------------------------------------------------------------------------------------------------------------------------------------------------------------------------------------------------------------------------------------------------------------------------------------------------------------------------------------------------------------------------------------------------------------------------------------------------------------------------------------------------------------------------------------------------------------------------------------------------------------------------------------------------------------------------------------------------------------------------------------------------------------------------|
| DistUt | UP   | DGAT1        | diacylglycerol O-acyltransferase 1(DGAT1)                             | GO:0019432-triglyceride biosynthetic process,GO:0019915-lipid storage,GO:0034379-very-low-density lipoprotein particle assembly,GO:0035336-long-chain fatty-acyl-CoA metabolic process,GO:0046339-diacylglycerol metabolic process,GO:0055089-fatty acid homeostasis,                                                                                                                                                                                                                                                                                                                                                                                                                                                                                                                                                                                                                                                                                                                                                                                                                                                                                                                                                                                                                                                                                                                                                                                                                                                                                                                                                                                                                                                                                                                                                                                                                                                                                                                                                                                                                      |
| DistUt | UP   | RUFY1        | RUN and FYVE domain containing 1(RUFY1)                               | GO:0030100-regulation of endocytosis,                                                                                                                                                                                                                                                                                                                                                                                                                                                                                                                                                                                                                                                                                                                                                                                                                                                                                                                                                                                                                                                                                                                                                                                                                                                                                                                                                                                                                                                                                                                                                                                                                                                                                                                                                                                                                                                                                                                                                                                                                                                      |
| DistUt | UP   | KBTBD4       | kelch repeat and BTB domain containing 4(KBTBD4)                      | GO:0030162-regulation of proteolysis,GO:0042787-protein ubiquitination involved in ubiquitin-dependent protein catabolic process,GO:0043161-proteasome-mediated ubiquitin-dependent protein catabolic process,                                                                                                                                                                                                                                                                                                                                                                                                                                                                                                                                                                                                                                                                                                                                                                                                                                                                                                                                                                                                                                                                                                                                                                                                                                                                                                                                                                                                                                                                                                                                                                                                                                                                                                                                                                                                                                                                             |
| DistUt | UP   | OLFML2A      | olfactomedin like 2A(OLFML2A)                                         | GO:0030198-extracellular matrix organization,                                                                                                                                                                                                                                                                                                                                                                                                                                                                                                                                                                                                                                                                                                                                                                                                                                                                                                                                                                                                                                                                                                                                                                                                                                                                                                                                                                                                                                                                                                                                                                                                                                                                                                                                                                                                                                                                                                                                                                                                                                              |
| DistUt | UP   | UBQLN4       | ubiquilin 4(UBQLN4)                                                   | GO:0032434-regulation of proteasomal ubiquitin-dependent protein catabolic process,GO:1901097-negative regulation of autophagosome maturation,                                                                                                                                                                                                                                                                                                                                                                                                                                                                                                                                                                                                                                                                                                                                                                                                                                                                                                                                                                                                                                                                                                                                                                                                                                                                                                                                                                                                                                                                                                                                                                                                                                                                                                                                                                                                                                                                                                                                             |
| DistUt | UP   | TRIM9        | tripartite motif containing 9(TRIM9)                                  | GO:0043161-proteasome-mediated ubiquitin-dependent protein catabolic process,                                                                                                                                                                                                                                                                                                                                                                                                                                                                                                                                                                                                                                                                                                                                                                                                                                                                                                                                                                                                                                                                                                                                                                                                                                                                                                                                                                                                                                                                                                                                                                                                                                                                                                                                                                                                                                                                                                                                                                                                              |
| DistUt | UP   | ZBTB7C       | zinc finger and BTB domain containing 7C(ZBTB7C)                      | GO:0045600-positive regulation of fat cell differentiation,GO:0045944-positive regulation of transcription from RNA polymerase II promoter,GO:1903025-regulation of RNA polymerase II regulatory region sequence-specific DNA binding,                                                                                                                                                                                                                                                                                                                                                                                                                                                                                                                                                                                                                                                                                                                                                                                                                                                                                                                                                                                                                                                                                                                                                                                                                                                                                                                                                                                                                                                                                                                                                                                                                                                                                                                                                                                                                                                     |
| DistUt | UP   | BRINP3       | BMP/retinoic acid inducible neural specific 3(BRINP3)                 | GO:0045666-positive regulation of neuron differentiation,GO:0045930-negative regulation of mitotic cell cycle,GO:0071300-cellular response to retinoic acid,                                                                                                                                                                                                                                                                                                                                                                                                                                                                                                                                                                                                                                                                                                                                                                                                                                                                                                                                                                                                                                                                                                                                                                                                                                                                                                                                                                                                                                                                                                                                                                                                                                                                                                                                                                                                                                                                                                                               |
| DistUt | UP   | KCTD1        | potassium channel tetramerization domain containing 1(KCTD1)          | GO:0045892-negative regulation of transcription, DNA-templated,GO:0051260-protein homooligomerization,                                                                                                                                                                                                                                                                                                                                                                                                                                                                                                                                                                                                                                                                                                                                                                                                                                                                                                                                                                                                                                                                                                                                                                                                                                                                                                                                                                                                                                                                                                                                                                                                                                                                                                                                                                                                                                                                                                                                                                                     |
| DistUt | UP   | MTMR7        | myotubularin related protein 7(MTMR7)                                 | GO:0046855-inositol phosphate dephosphorylation,GO:0046856-phosphatidylinositol dephosphorylation,                                                                                                                                                                                                                                                                                                                                                                                                                                                                                                                                                                                                                                                                                                                                                                                                                                                                                                                                                                                                                                                                                                                                                                                                                                                                                                                                                                                                                                                                                                                                                                                                                                                                                                                                                                                                                                                                                                                                                                                         |
| DistUt | UP   | DOPEY2       | dopey family member 2(DOPEY2)                                         | GO:0050890-cognition,                                                                                                                                                                                                                                                                                                                                                                                                                                                                                                                                                                                                                                                                                                                                                                                                                                                                                                                                                                                                                                                                                                                                                                                                                                                                                                                                                                                                                                                                                                                                                                                                                                                                                                                                                                                                                                                                                                                                                                                                                                                                      |
| DistUt | UP   | GARNL3       | GTPase activating Rap/RanGAP domain like 3(GARNL3)                    | GO:0051056-regulation of small GTPase mediated signal transduction,                                                                                                                                                                                                                                                                                                                                                                                                                                                                                                                                                                                                                                                                                                                                                                                                                                                                                                                                                                                                                                                                                                                                                                                                                                                                                                                                                                                                                                                                                                                                                                                                                                                                                                                                                                                                                                                                                                                                                                                                                        |
| DistUt | UP   | KCTD12       | potassium channel tetramerization domain containing 12(KCTD12)        | GO:0051260-protein homooligomerization,                                                                                                                                                                                                                                                                                                                                                                                                                                                                                                                                                                                                                                                                                                                                                                                                                                                                                                                                                                                                                                                                                                                                                                                                                                                                                                                                                                                                                                                                                                                                                                                                                                                                                                                                                                                                                                                                                                                                                                                                                                                    |
| DistUt | UP   | ATP2A3       | ATPase sarcoplasmic/endoplasmic reticulum Ca2+ transporting 3(ATP2A3) | GO:0070588-calcium ion transmembrane transport,                                                                                                                                                                                                                                                                                                                                                                                                                                                                                                                                                                                                                                                                                                                                                                                                                                                                                                                                                                                                                                                                                                                                                                                                                                                                                                                                                                                                                                                                                                                                                                                                                                                                                                                                                                                                                                                                                                                                                                                                                                            |
| DistUt | UP   | MPP1         | membrane palmitoylated protein 1(MPP1)                                | GO:0090022-regulation of neutrophil chemotaxis,                                                                                                                                                                                                                                                                                                                                                                                                                                                                                                                                                                                                                                                                                                                                                                                                                                                                                                                                                                                                                                                                                                                                                                                                                                                                                                                                                                                                                                                                                                                                                                                                                                                                                                                                                                                                                                                                                                                                                                                                                                            |
| DistUt | UP   | WRAP73       | WD repeat containing, antisense to TP73(WRAP73)                       | GO:0090307-mitotic spindle assembly,GO:1902857-positive regulation of nonmotile primary cilium assembly,                                                                                                                                                                                                                                                                                                                                                                                                                                                                                                                                                                                                                                                                                                                                                                                                                                                                                                                                                                                                                                                                                                                                                                                                                                                                                                                                                                                                                                                                                                                                                                                                                                                                                                                                                                                                                                                                                                                                                                                   |
| DistUt | UP   | LOC100521617 | mvelin and lymphocyte protein(LOC100521617)                           | GO:1902043-positive regulation of extrinsic apoptotic signaling pathway via death domain receptors,                                                                                                                                                                                                                                                                                                                                                                                                                                                                                                                                                                                                                                                                                                                                                                                                                                                                                                                                                                                                                                                                                                                                                                                                                                                                                                                                                                                                                                                                                                                                                                                                                                                                                                                                                                                                                                                                                                                                                                                        |
| DistUt | DOWN | WIP1         | WD repeat domain, phosphoinositide interacting 1(WIP1)                | GO:0000045-autophagosome assembly,GO:0000422-mitophagy,GO:0006497-protein lipidation,GO:0034497-protein localization to pre-autophagosomal structure,GO:0044804-nucleophagy,GO:0048203-vesicle targeting, trans-Golgi to endosome,                                                                                                                                                                                                                                                                                                                                                                                                                                                                                                                                                                                                                                                                                                                                                                                                                                                                                                                                                                                                                                                                                                                                                                                                                                                                                                                                                                                                                                                                                                                                                                                                                                                                                                                                                                                                                                                         |
| DistUt | DOWN | FGFR1        | fibroblast growth factor receptor 1(FGFR1)                            | GO:0000122-negative regulation of transcription from RNA polymerase II promoter,GO:0001525-angiogenesis,GO:0001657-ureteric bud development,GO:0001701-in utero embryonic development,GO:0001759-organ induction,GO:0002053-positive regulation of mesenchymal cell proliferation,GO:0002062-chondrocyte differentiation,GO:0007037-vacuolar phosphate transport,GO:0007605-sensory perception of sound,GO:0008284-positive regulation of cell proliferation,GO:0010863-positive regulation of phospholipase C activity,GO:0010976-positive regulation of neuron projection development,GO:0021847-ventricular zone neuroblast division,GO:0030326-embryonic limb morphogenesis,GO:0030901-midbrain development,GO:0035607-fibroblast growth factor receptor signaling pathway involved in orbitofrontal cortex development,GO:0042472-inner ear morphogenesis,GO:0042473-outer ear morphogenesis,GO:0042474-middle ear morphogenesis,GO:0043406-positive regulation of MAP kinase activity,GO:0045787-positive regulation of cell cycle,GO:0046777-protein autophosphorylation,GO:0048339-paraxial mesoderm development,GO:0048378-regulation of lateral mesodermal cell fate specification,GO:0048469-cell maturation,GO:0048762-mesenchymal cell differentiation,GO:0060045-positive regulation of cardiac muscle cell proliferation,GO:0060117-auditory receptor cell development,GO:0060445-branching involved in salivary gland morphogenesis,GO:0060484-lung-associated mesenchyme development,GO:0060665-regulation of branching involved in salivary gland morphogenesis by mesenchymal-epithelial signaling,GO:0070640-vitamin D3 metabolic process,GO:0090080-positive regulation of MAPKKK cascade by fibroblast growth factor receptor signaling pathway,GO:0090272-negative regulation of fibroblast growth factor production,GO:2000546-positive regulation of endothelial cell chemotaxis to fibroblast growth factor,GO:2000830-positive regulation of parathyroid hormone secretion,GO:2001239-regulation of extrinsic apoptotic signaling pathway in absence of ligand, |
| DistUt | DOWN | TCF7L2       | transcription factor 7 like 2(TCF7L2)                                 | GO:0000122-negative regulation of transcription from RNA polymerase II promoter,GO:0001568-blood vessel development,GO:0006357-regulation of transcription from RNA polymerase II promoter,GO:0007050-cell cycle arrest,GO:0008283-cell proliferation,GO:0010909-positive regulation of heparan sulfate proteoglycan biosynthetic process,GO:0032024-positive regulation of insulin secretion,GO:0032092-positive regulation of protein binding,GO:0032350-regulation of hormone metabolic process,GO:0042593-glucose homeostasis,GO:0043433-negative regulation of sequence-specific DNA binding transcription factor activity,GO:0043570-maintenance of DNA repeat elements,GO:0044334-canonical Wnt signaling pathway involved in positive regulation of epithelial to mesenchymal transition,GO:0045444-fat cell differentiation,GO:0045944-positive regulation of transcription from RNA polymerase II promoter,GO:0046827-positive regulation of protein export from nucleus,GO:0048625-myoblast fate commitment,GO:0048660-regulation of smooth muscle cell proliferation,GO:0051897-positive regulation of protein kinase B signaling,GO:0060070-canonical Wnt signaling pathway,GO:0090090-negative regulation of canonical Wnt signaling pathway,GO:2000675-negative regulation of type B pancreatic cell apoptotic process,GO:2001237-negative regulation of extrinsic apoptotic signaling pathway,                                                                                                                                                                                                                                                                                                                                                                                                                                                                                                                                                                                                                                                                             |
| DistUt | DOWN | TDG          | thymine-DNA glycosylase(TDG)                                          | GO:0000122-negative regulation of transcription from RNA polymerase II promoter,GO:0006285-base-excision repair, AP site formation,GO:0006298-mismatch repair,GO:0009790-embryo development,GO:0032091-negative regulation of protein binding,GO:0035562-negative regulation of chromatin binding,GO:0040029-regulation of gene expression, epigenetic,GO:0080111-DNA demethylation,                                                                                                                                                                                                                                                                                                                                                                                                                                                                                                                                                                                                                                                                                                                                                                                                                                                                                                                                                                                                                                                                                                                                                                                                                                                                                                                                                                                                                                                                                                                                                                                                                                                                                                       |
| DistUt | DOWN | LOC100736857 | microphthalmia-associated transcription factor-like(LOC100736857)     | GO:0000122-negative regulation of transcription from RNA polymerase II promoter,GO:0006461-protein complex assembly,GO:0030318-melanocyte differentiation,GO:0042981-regulation of apoptotic process,GO:0045670-regulation of osteoclast differentiation,GO:0097531-mast cell migration,GO:2000144-positive regulation of DNA-templated transcription, initiation,                                                                                                                                                                                                                                                                                                                                                                                                                                                                                                                                                                                                                                                                                                                                                                                                                                                                                                                                                                                                                                                                                                                                                                                                                                                                                                                                                                                                                                                                                                                                                                                                                                                                                                                         |
| DistUt | DOWN | MOSPD1       | motile sperm domain containing 1(MOSPD1)                              | GO:0000122-negative regulation of transcription from RNA polymerase II promoter,GO:0045944-positive regulation of transcription from RNA polymerase II promoter,                                                                                                                                                                                                                                                                                                                                                                                                                                                                                                                                                                                                                                                                                                                                                                                                                                                                                                                                                                                                                                                                                                                                                                                                                                                                                                                                                                                                                                                                                                                                                                                                                                                                                                                                                                                                                                                                                                                           |
| DistUt | DOWN | PRDM1        | PR/SET domain 1(PRDM1)                                                | GO:0000122-negative regulation of transcription from RNA polymerase II promoter,GO:0004869-cellular developmental process,                                                                                                                                                                                                                                                                                                                                                                                                                                                                                                                                                                                                                                                                                                                                                                                                                                                                                                                                                                                                                                                                                                                                                                                                                                                                                                                                                                                                                                                                                                                                                                                                                                                                                                                                                                                                                                                                                                                                                                 |
| DistUt | DOWN | VCAN         | versican(VCAN)                                                        | GO:001501-skeletal system development,GO:0001649-osteoblast differentiation,GO:0007155-cell adhesion,GO:0007417-central nervous system development,                                                                                                                                                                                                                                                                                                                                                                                                                                                                                                                                                                                                                                                                                                                                                                                                                                                                                                                                                                                                                                                                                                                                                                                                                                                                                                                                                                                                                                                                                                                                                                                                                                                                                                                                                                                                                                                                                                                                        |
| DistUt | DOWN | FBN1         | fibrillin 1(FBN1)                                                     | GO:0001501-skeletal system development,GO:0006006-glucose metabolic process,GO:0007507-heart development,GO:0009653-anatomical structure morphogenesis,GO:0010737-protein kinase A signaling,GO:0034199-activation of protein kinase A activity,GO:0042593-glucose homeostasis,GO:0043010-camera-type eye development,GO:0048048-embryonic eye morphogenesis,GO:0048050-post-embryonic eye morphogenesis,GO:0090287-regulation of cellular response to growth factor stimulus,                                                                                                                                                                                                                                                                                                                                                                                                                                                                                                                                                                                                                                                                                                                                                                                                                                                                                                                                                                                                                                                                                                                                                                                                                                                                                                                                                                                                                                                                                                                                                                                                             |
| DistUt | DOWN | COL5A2       | collagen type V alpha 2 chain(COL5A2)                                 | GO:0001501-skeletal system development,GO:0030199-collagen fibril organization,GO:0043588-skin development,GO:0048592-eye morphogenesis,GO:0071230-cellular response to amino acid stimulus,GO:1903225-negative regulation of endodermal cell differentiation,                                                                                                                                                                                                                                                                                                                                                                                                                                                                                                                                                                                                                                                                                                                                                                                                                                                                                                                                                                                                                                                                                                                                                                                                                                                                                                                                                                                                                                                                                                                                                                                                                                                                                                                                                                                                                             |
| DistUt | DOWN | EIF2AK3      | eukaryotic translation initiation factor 2 alpha kinase 3(EIF2AK3)    | GO:0001503-ossification,GO:0001525-angiogenesis,GO:0006983-ER overload response,GO:0010575-positive regulation of vascular endothelial growth factor production,GO:0030968-endoplasmic reticulum unfolded protein response,GO:0031018-endocrine pancreas development,GO:0034198-cellular response to amino acid starvation,GO:0036492-eif2alpha phosphorylation in response to endoplasmic reticulum stress,GO:0042149-cellular response to glucose starvation,GO:0045943-positive regulation of transcription from RNA polymerase I promoter,GO:0046777-protein autophosphorylation,GO:0051260-protein homooligomerization,GO:0070417-cellular response to cold,GO:1902235-regulation of endoplasmic reticulum stress-induced intrinsic apoptotic signaling pathway,                                                                                                                                                                                                                                                                                                                                                                                                                                                                                                                                                                                                                                                                                                                                                                                                                                                                                                                                                                                                                                                                                                                                                                                                                                                                                                                      |
| DistUt | DOWN | DMP1         | dentin matrix acidic phosphoprotein 1(DMP1)                           | GO:0001503-ossification,GO:0010811-positive regulation of cell-substrate adhesion,GO:0030198-extracellular matrix organization,GO:0070173-regulation of enamel mineralization,                                                                                                                                                                                                                                                                                                                                                                                                                                                                                                                                                                                                                                                                                                                                                                                                                                                                                                                                                                                                                                                                                                                                                                                                                                                                                                                                                                                                                                                                                                                                                                                                                                                                                                                                                                                                                                                                                                             |

|        |      |              |                                                                                                |                                                                                                                                                                                                                                                                                                                                                                                                                                                                                                                                                                                                                                                                                                                                                                                                                                                                                                                                                                                                                                                                                                                                                                                                                                                                                                                                                                                                                                                                                                                                                                                                                                                                                                                                                                                                                                                                                                                                                                                                                                                                                                                                                                                                                                                                                                                                                                                                                                                                                                                                                                                                                                                                                                                                                                                                                                                                                                                                                                                                                                                                                                                                                                                                                                                                                                                                                                              |
|--------|------|--------------|------------------------------------------------------------------------------------------------|------------------------------------------------------------------------------------------------------------------------------------------------------------------------------------------------------------------------------------------------------------------------------------------------------------------------------------------------------------------------------------------------------------------------------------------------------------------------------------------------------------------------------------------------------------------------------------------------------------------------------------------------------------------------------------------------------------------------------------------------------------------------------------------------------------------------------------------------------------------------------------------------------------------------------------------------------------------------------------------------------------------------------------------------------------------------------------------------------------------------------------------------------------------------------------------------------------------------------------------------------------------------------------------------------------------------------------------------------------------------------------------------------------------------------------------------------------------------------------------------------------------------------------------------------------------------------------------------------------------------------------------------------------------------------------------------------------------------------------------------------------------------------------------------------------------------------------------------------------------------------------------------------------------------------------------------------------------------------------------------------------------------------------------------------------------------------------------------------------------------------------------------------------------------------------------------------------------------------------------------------------------------------------------------------------------------------------------------------------------------------------------------------------------------------------------------------------------------------------------------------------------------------------------------------------------------------------------------------------------------------------------------------------------------------------------------------------------------------------------------------------------------------------------------------------------------------------------------------------------------------------------------------------------------------------------------------------------------------------------------------------------------------------------------------------------------------------------------------------------------------------------------------------------------------------------------------------------------------------------------------------------------------------------------------------------------------------------------------------------------------|
| DistUt | DOWN | ACKR3        | atypical chemokine receptor 3(ACKR3)                                                           | GO:0001525-angiogenesis,GO:0001570-vasculogenesis,GO:0002230-positive regulation of defense response to virus by host,GO:0006935-chemotaxis,GO:0031623-receptor internalization,GO:0070374-positive regulation of ERK1 and ERK2 cascade,GO:0098792-xenophagy,GO:1902230-negative regulation of intrinsic apoptotic signaling pathway in response to DNA damage,                                                                                                                                                                                                                                                                                                                                                                                                                                                                                                                                                                                                                                                                                                                                                                                                                                                                                                                                                                                                                                                                                                                                                                                                                                                                                                                                                                                                                                                                                                                                                                                                                                                                                                                                                                                                                                                                                                                                                                                                                                                                                                                                                                                                                                                                                                                                                                                                                                                                                                                                                                                                                                                                                                                                                                                                                                                                                                                                                                                                              |
| DistUt | DOWN | HIF1A        | hypoxia inducible factor 1, alpha subunit (basic helix-loop-helix transcription factor)(HIF1A) | GO:0001525-angiogenesis,GO:0001755-neural crest cell migration,GO:0001837-epithelial to mesenchymal transition,GO:0001892-embryonic placenta development,GO:0001922-B-1 B cell homeostasis,GO:0001947-heart looping,GO:0002052-positive regulation of neuroblast proliferation,GO:0002248-connective tissue replacement involved in inflammatory response wound healing,GO:0003151-outflow tract morphogenesis,GO:0003208-cardiac ventricle morphogenesis,GO:0006089-lactate metabolic process,GO:0006110-regulation of glycolytic process,GO:0006351-transcription, DNA-templated,GO:0006879-cellular iron ion homeostasis,GO:0007595-lactation,GO:0008542-visual learning,GO:0010573-vascular endothelial growth factor production,GO:0010575-positive regulation of vascular endothelial growth factor production,GO:0010634-positive regulation of epithelial cell migration,GO:0010870-positive regulation of receptor biosynthetic process,GO:0014850-response to muscle activity,GO:0016239-positive regulation of macroautophagy,GO:0019896-axonal transport of mitochondrion,GO:0021502-neural fold elevation formation,GO:0021987-cerebral cortex development,GO:0030502-negative regulation of bone mineralization,GO:0030949-positive regulation of vascular endothelial growth factor receptor signaling pathway,GO:0032007-negative regulation of TOR signaling,GO:0032364-oxygen homeostasis,GO:0032909-regulation of transforming growth factor beta2 production,GO:0032963-collagen metabolic process,GO:0035162-embryonic hemopoiesis,GO:0035774-positive regulation of insulin secretion involved in cellular response to glucose stimulus,GO:0042541-hemoglobin biosynthetic process,GO:0042593-glucose homeostasis,GO:0043619-regulation of transcription from RNA polymerase II promoter in response to oxidative stress,GO:0045648-positive regulation of erythrocyte differentiation,GO:0045766-positive regulation of angiogenesis,GO:0045926-negative regulation of growth,GO:0045944-positive regulation of transcription from RNA polymerase II promoter,GO:0046716-muscle cell cellular homeostasis,GO:0046886-positive regulation of hormone biosynthetic process,GO:0048546-digestive tract morphogenesis,GO:0050790-regulation of catalytic activity,GO:0051216-cartilage development,GO:0051541-elastin metabolic process,GO:0060574-intestinal epithelial cell maturation,GO:0061030-epithelial cell differentiation involved in mammary gland alveolus development,GO:0061072-iris morphogenesis,GO:0061298-retina vasculature development in camera-type eye,GO:0061419-positive regulation of transcription from RNA polymerase II promoter in response to hypoxia,GO:0070244-negative regulation of thymocyte apoptotic process,GO:0071347-cellular response to interleukin-1,GO:0071542-dopaminergic neuron differentiation,GO:0097411-hypoxia-inducible factor-1alpha signaling pathway,GO:1902895-positive regulation of pri-miRNA transcription from RNA polymerase II promoter,GO:1903377-negative regulation of oxidative stress-induced neuron intrinsic apoptotic signaling pathway,GO:1903599-positive regulation of mitophagy,GO:1903715-regulation of aerobic respiration,GO:2000378-negative regulation of reactive oxygen species metabolic process,GO:2001054-negative regulation of mesenchymal cell apoptotic process, |
| DistUt | DOWN | ENPEP        | glutamyl aminopeptidase(ENPEP)                                                                 | GO:0001525-angiogenesis,GO:0002003-angiotensin maturation,GO:0003081-regulation of systemic arterial blood pressure by renin-angiotensin,GO:0065088-proteolysis,GO:008217-regulation of blood pressure,GO:0008283-cell proliferation,GO:0016477-cell migration,GO:0032835-glomerulus development,GO:0043171-peptide catabolic process,                                                                                                                                                                                                                                                                                                                                                                                                                                                                                                                                                                                                                                                                                                                                                                                                                                                                                                                                                                                                                                                                                                                                                                                                                                                                                                                                                                                                                                                                                                                                                                                                                                                                                                                                                                                                                                                                                                                                                                                                                                                                                                                                                                                                                                                                                                                                                                                                                                                                                                                                                                                                                                                                                                                                                                                                                                                                                                                                                                                                                                       |
| DistUt | DOWN | SRPX2        | sushi repeat containing protein, X-linked 2(SRPX2)                                             | GO:0001525-angiogenesis,GO:0016337-single organismal cell-cell adhesion,GO:0042325-regulation of phosphorylation,GO:0048870-cell motility,GO:0051965-positive regulation of synapse assembly,GO:0071625-vocalization behavior,GO:0090050-positive regulation of cell migration involved in sprouting angiogenesis,                                                                                                                                                                                                                                                                                                                                                                                                                                                                                                                                                                                                                                                                                                                                                                                                                                                                                                                                                                                                                                                                                                                                                                                                                                                                                                                                                                                                                                                                                                                                                                                                                                                                                                                                                                                                                                                                                                                                                                                                                                                                                                                                                                                                                                                                                                                                                                                                                                                                                                                                                                                                                                                                                                                                                                                                                                                                                                                                                                                                                                                           |
| DistUt | DOWN | COL4A1       | collagen type IV alpha 1 chain(COL4A1)                                                         | GO:0001569-patterning of blood vessels,GO:0007420-brain development,GO:0007528-neuromuscular junction development,GO:00061304-retinal blood vessel morphogenesis,GO:0061333-renal tubule morphogenesis,GO:0071230-cellular response to amino acid stimulus,GO:0071711-basement membrane organization,                                                                                                                                                                                                                                                                                                                                                                                                                                                                                                                                                                                                                                                                                                                                                                                                                                                                                                                                                                                                                                                                                                                                                                                                                                                                                                                                                                                                                                                                                                                                                                                                                                                                                                                                                                                                                                                                                                                                                                                                                                                                                                                                                                                                                                                                                                                                                                                                                                                                                                                                                                                                                                                                                                                                                                                                                                                                                                                                                                                                                                                                        |
| DistUt | DOWN | GJA1         | gap junction protein alpha 1(GJA1)                                                             | GO:0001649-osteoblast differentiation,GO:0001701-in utero embryonic development,GO:0001764-neuron migration,GO:0001947-heart looping,GO:0002070-epithelial cell maturation,GO:0002088-lens development in camera-type eye,GO:0002931-response to ischemia,GO:0003294-atrial ventricular junction remodeling,GO:0007154-cell communication,GO:0007267-cell-cell signaling,GO:0007507-heart development,GO:0007512-adult heart development,GO:0009611-response to wounding,GO:0010628-positive regulation of gene expression,GO:0010629-negative regulation of gene expression,GO:0010643-cell communication by chemical coupling,GO:0030308-negative regulation of cell growth,GO:0030500-regulation of bone mineralization,GO:0036120-cellular response to platelet-derived growth factor stimulus,GO:0042733-embryonic digit morphogenesis,GO:0043123-positive regulation of 1-kappaB kinase/NF-kappaB signaling,GO:0043403-skeletal muscle tissue regeneration,GO:0045216-cell-cell junction organization,GO:0045669-positive regulation of osteoblast differentiation,GO:0045844-positive regulation of striated muscle tissue development,GO:0046850-regulation of bone remodeling,GO:0048514-blood vessel morphogenesis,GO:0055085-transmembrane transport,GO:0060156-milk ejection,GO:0060307-regulation of ventricular cardiac muscle cell membrane repolarization,GO:0060371-regulation of atrial cardiac muscle cell membrane depolarization,GO:0060373-regulation of ventricular cardiac muscle cell membrane depolarization,GO:0061337-cardiac conduction,GO:0071673-positive regulation of smooth muscle cell chemotaxis,                                                                                                                                                                                                                                                                                                                                                                                                                                                                                                                                                                                                                                                                                                                                                                                                                                                                                                                                                                                                                                                                                                                                                                                                                                                                                                                                                                                                                                                                                                                                                                                                                                                                                                                                        |
| DistUt | DOWN | MRC2         | mannose receptor C type 2(MRC2)                                                                | GO:0001649-osteoblast differentiation,GO:0030574-collagen catabolic process,                                                                                                                                                                                                                                                                                                                                                                                                                                                                                                                                                                                                                                                                                                                                                                                                                                                                                                                                                                                                                                                                                                                                                                                                                                                                                                                                                                                                                                                                                                                                                                                                                                                                                                                                                                                                                                                                                                                                                                                                                                                                                                                                                                                                                                                                                                                                                                                                                                                                                                                                                                                                                                                                                                                                                                                                                                                                                                                                                                                                                                                                                                                                                                                                                                                                                                 |
| DistUt | DOWN | PLAU         | plasminogen activator, urokinase(PLAU)                                                         | GO:0001666-response to hypoxia,GO:0006508-proteolysis,GO:0010469-regulation of receptor activity,GO:0014909-smooth muscle cell migration,GO:0014910-regulation of smooth muscle cell migration,GO:0030335-positive regulation of cell migration,GO:0033628-regulation of cell adhesion mediated by integrin,GO:0042127-regulation of cell proliferation,GO:0042730-fibrinolysis,GO:2000097-regulation of smooth muscle cell-matrix adhesion,                                                                                                                                                                                                                                                                                                                                                                                                                                                                                                                                                                                                                                                                                                                                                                                                                                                                                                                                                                                                                                                                                                                                                                                                                                                                                                                                                                                                                                                                                                                                                                                                                                                                                                                                                                                                                                                                                                                                                                                                                                                                                                                                                                                                                                                                                                                                                                                                                                                                                                                                                                                                                                                                                                                                                                                                                                                                                                                                 |
| DistUt | DOWN | PLOD2        | procollagen-lysine,2-oxoglutarate 5-dioxygenase 2(PLOD2)                                       | GO:0001666-response to hypoxia,GO:0098779-mitophagy in response to mitochondrial depolarization,                                                                                                                                                                                                                                                                                                                                                                                                                                                                                                                                                                                                                                                                                                                                                                                                                                                                                                                                                                                                                                                                                                                                                                                                                                                                                                                                                                                                                                                                                                                                                                                                                                                                                                                                                                                                                                                                                                                                                                                                                                                                                                                                                                                                                                                                                                                                                                                                                                                                                                                                                                                                                                                                                                                                                                                                                                                                                                                                                                                                                                                                                                                                                                                                                                                                             |
| DistUt | DOWN | MAN2A1       | mannosidase alpha class 2A member 1(MAN2A1)                                                    | GO:0001701-in utero embryonic development,GO:0001889-liver development,GO:0006013-mannose metabolic process,GO:0006491-N-glycan processing,GO:0006517-protein deglycosylation,GO:0007005-mitochondrion organization,GO:0007033-vacuole organization,GO:0007585-respiratory gaseous exchange,GO:0048286-lung alveolus development,GO:0050769-positive regulation of neurogenesis,GO:0060042-retina morphogenesis in camera-type eye,                                                                                                                                                                                                                                                                                                                                                                                                                                                                                                                                                                                                                                                                                                                                                                                                                                                                                                                                                                                                                                                                                                                                                                                                                                                                                                                                                                                                                                                                                                                                                                                                                                                                                                                                                                                                                                                                                                                                                                                                                                                                                                                                                                                                                                                                                                                                                                                                                                                                                                                                                                                                                                                                                                                                                                                                                                                                                                                                          |
| DistUt | DOWN | LOC100739844 | semaphorin-3A-like(LOC100739844)                                                               | GO:0001755-neural crest cell migration,GO:0021772-olfactory bulb development,GO:0048843-negative regulation of axon extension involved in axon guidance,GO:0050919-negative chemotaxis,GO:0071526-semaphorin-plexin signaling pathway,GO:2001224-positive regulation of neuron migration,                                                                                                                                                                                                                                                                                                                                                                                                                                                                                                                                                                                                                                                                                                                                                                                                                                                                                                                                                                                                                                                                                                                                                                                                                                                                                                                                                                                                                                                                                                                                                                                                                                                                                                                                                                                                                                                                                                                                                                                                                                                                                                                                                                                                                                                                                                                                                                                                                                                                                                                                                                                                                                                                                                                                                                                                                                                                                                                                                                                                                                                                                    |
| DistUt | DOWN | S1PR3        | sphingosine-1-phosphate receptor 3(S1PR3)                                                      | GO:0001816-cytokine production,GO:0006954-inflammatory response,GO:0007193-adenylate cyclase-inhibiting G-protein coupled receptor signaling pathway,GO:0007219-Notch signaling pathway,GO:0032651-regulation of interleukin-1 beta production,GO:1903141-negative regulation of establishment of endothelial barrier,                                                                                                                                                                                                                                                                                                                                                                                                                                                                                                                                                                                                                                                                                                                                                                                                                                                                                                                                                                                                                                                                                                                                                                                                                                                                                                                                                                                                                                                                                                                                                                                                                                                                                                                                                                                                                                                                                                                                                                                                                                                                                                                                                                                                                                                                                                                                                                                                                                                                                                                                                                                                                                                                                                                                                                                                                                                                                                                                                                                                                                                       |
| DistUt | DOWN | AGTR1        | angiotensin II receptor type 1(AGTR1)                                                          | GO:0001822-kidney development,GO:0007266-Rho protein signal transduction,GO:0010873-positive regulation of cholesterol esterification,GO:0019229-regulation of vasoconstriction,GO:0019722-calcium-mediated signaling,GO:0032270-positive regulation of cellular protein metabolic process,GO:0032430-positive regulation of phospholipase A2 activity,GO:0051482-positive regulation of cytosolic calcium ion concentration involved in phospholipase C-activating G-protein coupled signaling pathway,GO:0060326-cell chemotaxis,GO:0086097-phospholipase C-activating angiotensin-activated signaling pathway,                                                                                                                                                                                                                                                                                                                                                                                                                                                                                                                                                                                                                                                                                                                                                                                                                                                                                                                                                                                                                                                                                                                                                                                                                                                                                                                                                                                                                                                                                                                                                                                                                                                                                                                                                                                                                                                                                                                                                                                                                                                                                                                                                                                                                                                                                                                                                                                                                                                                                                                                                                                                                                                                                                                                                            |
| DistUt | DOWN | SEC63        | SEC63 homolog, protein translocation regulator(SEC63)                                          | GO:0001889-liver development,GO:0006614-SRP-dependent cotranslational protein targeting to membrane,GO:0006620-posttranslational protein targeting to membrane,GO:0006807-nitrogen compound metabolic process,GO:0010259-multicellular organism aging,GO:0072001-renal system development,                                                                                                                                                                                                                                                                                                                                                                                                                                                                                                                                                                                                                                                                                                                                                                                                                                                                                                                                                                                                                                                                                                                                                                                                                                                                                                                                                                                                                                                                                                                                                                                                                                                                                                                                                                                                                                                                                                                                                                                                                                                                                                                                                                                                                                                                                                                                                                                                                                                                                                                                                                                                                                                                                                                                                                                                                                                                                                                                                                                                                                                                                   |
| DistUt | DOWN | INPP5F       | inositol polyphosphate-5-phosphatase F(INPP5F)                                                 | GO:0001921-positive regulation of receptor recycling,GO:0008344-adult locomotory behavior,GO:0014898-cardiac muscle hypertrophy in response to stress,GO:0031161-phosphatidylinositol catabolic process,GO:0042518-negative regulation of tyrosine phosphorylation of Stat3 protein,GO:0046856-phosphatidylinositol dephosphorylation,GO:0048015-phosphatidylinositol-mediated signaling,GO:0048681-negative regulation of axon regeneration,GO:0072583-clathrin-mediated endocytosis,GO:2000145-regulation of cell motility,GO:2001135-regulation of endocytic recycling,                                                                                                                                                                                                                                                                                                                                                                                                                                                                                                                                                                                                                                                                                                                                                                                                                                                                                                                                                                                                                                                                                                                                                                                                                                                                                                                                                                                                                                                                                                                                                                                                                                                                                                                                                                                                                                                                                                                                                                                                                                                                                                                                                                                                                                                                                                                                                                                                                                                                                                                                                                                                                                                                                                                                                                                                   |
| DistUt | DOWN | PRNP         | prion protein(PRNP)                                                                            | GO:0001933-negative regulation of protein phosphorylation,GO:0006979-response to oxidative stress,GO:0032689-negative regulation of interferon-gamma production,GO:0032700-negative regulation of interleukin-17 production,GO:0032703-negative regulation of interleukin-2 production,GO:0032880-regulation of protein localization,GO:0035690-cellular response to drug,GO:0043066-negative regulation of apoptotic process,GO:0043433-negative regulation of sequence-specific DNA binding transcription factor activity,GO:0046007-negative regulation of activated T cell proliferation,GO:0050860-negative regulation of T cell receptor signaling pathway,GO:0051260-protein homooligomerization,GO:0070885-negative regulation of calcineurin-NFAT signaling cascade,GO:0071280-cellular response to copper ion,GO:1901379-regulation of potassium ion transmembrane transport,                                                                                                                                                                                                                                                                                                                                                                                                                                                                                                                                                                                                                                                                                                                                                                                                                                                                                                                                                                                                                                                                                                                                                                                                                                                                                                                                                                                                                                                                                                                                                                                                                                                                                                                                                                                                                                                                                                                                                                                                                                                                                                                                                                                                                                                                                                                                                                                                                                                                                      |
| DistUt | DOWN | PLAUR        | plasminogen activator, urokinase receptor(PLAUR)                                               | GO:0001934-positive regulation of protein phosphorylation,GO:0030162-regulation of proteolysis,GO:0038195-urokinase plasminogen activator signaling pathway,GO:0043388-positive regulation of DNA binding,GO:0045742-positive regulation of epidermal growth factor receptor signaling pathway,GO:0090200-positive regulation of release of cytochrome c from mitochondria,GO:2001243-negative regulation of intrinsic apoptotic signaling pathway,GO:2001268-negative regulation of cysteine-type endopeptidase activity involved in apoptotic signaling pathway,                                                                                                                                                                                                                                                                                                                                                                                                                                                                                                                                                                                                                                                                                                                                                                                                                                                                                                                                                                                                                                                                                                                                                                                                                                                                                                                                                                                                                                                                                                                                                                                                                                                                                                                                                                                                                                                                                                                                                                                                                                                                                                                                                                                                                                                                                                                                                                                                                                                                                                                                                                                                                                                                                                                                                                                                           |



|        |      |         |                                                                                                |                                                                                                                                                                                                                                                                                                                                                                                                                                                                                                                                                                                                                                                                                                                                                                                                                                                                                                                                                                                                                                                                                                                                                                                           |
|--------|------|---------|------------------------------------------------------------------------------------------------|-------------------------------------------------------------------------------------------------------------------------------------------------------------------------------------------------------------------------------------------------------------------------------------------------------------------------------------------------------------------------------------------------------------------------------------------------------------------------------------------------------------------------------------------------------------------------------------------------------------------------------------------------------------------------------------------------------------------------------------------------------------------------------------------------------------------------------------------------------------------------------------------------------------------------------------------------------------------------------------------------------------------------------------------------------------------------------------------------------------------------------------------------------------------------------------------|
| DistUt | DOWN | CRYGS   | crystallin gamma S(CRYGS)                                                                      | GO:002009--morphogenesis of an epithelium,GO:002088--lens development in camera-type eye,                                                                                                                                                                                                                                                                                                                                                                                                                                                                                                                                                                                                                                                                                                                                                                                                                                                                                                                                                                                                                                                                                                 |
| DistUt | DOWN | ARL6IP5 | ADP ribosylation factor like GTPase 6 interacting protein 5(ARL6IP5)                           | GO:002037--negative regulation of L-glutamate transport,GO:0008631--intrinsic apoptotic signaling pathway in response to oxidative stress,GO:0010917--negative regulation of mitochondrial membrane potential,GO:0015813--L-glutamate transport,GO:0032874--positive regulation of stress-activated MAPK cascade,GO:0043280--positive regulation of cysteine-type endopeptidase activity involved in apoptotic process,                                                                                                                                                                                                                                                                                                                                                                                                                                                                                                                                                                                                                                                                                                                                                                   |
| DistUt | DOWN | FOXP2   | forkhead box P2(FOXP2)                                                                         | GO:002053--positive regulation of mesenchymal cell proliferation,GO:0006351--transcription, DNA-templated,GO:0007519--skeletal muscle tissue development,GO:0009791--post-embryonic development,GO:0021549--cerebellum development,GO:0021757--caudate nucleus development,GO:0021758--putamen development,GO:0021987--cerebral cortex development,GO:0042297--vocal learning,GO:0043010--camera-type eye development,GO:0048286--lung alveolus development,GO:0048745--smooth muscle tissue development,GO:0060013--righting reflex,GO:0060501--positive regulation of epithelial cell proliferation involved in lung morphogenesis,                                                                                                                                                                                                                                                                                                                                                                                                                                                                                                                                                     |
| DistUt | DOWN | WNT2    | Wnt family member 2(WNT2)                                                                      | GO:002053--positive regulation of mesenchymal cell proliferation,GO:0016055--Wnt signaling pathway,GO:0030182--neuron differentiation,GO:0033278--cell proliferation in midbrain,GO:0045165--cell fate commitment,GO:0045944--positive regulation of transcription from RNA polymerase II promoter,GO:0048146--positive regulation of fibroblast proliferation,GO:0050769--positive regulation of neurogenesis,GO:0051091--positive regulation of sequence-specific DNA binding transcription factor activity,GO:0055009--atrial cardiac muscle tissue morphogenesis,GO:0060045--positive regulation of cardiac muscle cell proliferation,GO:0060070--canonical Wnt signaling pathway,GO:0060317--cardiac epithelial to mesenchymal transition,GO:0060492--lung induction,GO:0060501--positive regulation of epithelial cell proliferation involved in lung morphogenesis,GO:0060716--labyrinthine layer blood vessel development,GO:0061180--mammary gland epithelium development,GO:0071560--cellular response to transforming growth factor beta stimulus,GO:0090263--positive regulation of canonical Wnt signaling pathway,GO:1904948--midbrain dopaminergic neuron differentiation, |
| DistUt | DOWN | CREB3L2 | cAMP responsive element binding protein 3 like 2(CREB3L2)                                      | GO:002062--chondrocyte differentiation,GO:0066888--ER to Golgi vesicle-mediated transport,GO:0030968--endoplasmic reticulum unfolded protein response,                                                                                                                                                                                                                                                                                                                                                                                                                                                                                                                                                                                                                                                                                                                                                                                                                                                                                                                                                                                                                                    |
| DistUt | DOWN | B4GALT1 | beta-1,4-galactosyltransferase 1(B4GALT1)                                                      | GO:002064--epithelial cell development,GO:002526--acute inflammatory response,GO:0005989--lactose biosynthetic process,GO:0006012--galactose metabolic process,GO:0006487--protein N-linked glycosylation,GO:0007155--cell adhesion,GO:0007339--binding of sperm to zona pellucida,GO:0007341--penetration of zona pellucida,GO:0008285--negative regulation of cell proliferation,GO:0030198--extracellular matrix organization,GO:0030879--mammary gland development,GO:0045136--development of secondary sexual characteristics,GO:0048754--branching morphogenesis of an epithelial tube,GO:0050900--leukocyte migration,GO:0051270--regulation of cellular component movement,GO:0060046--regulation of acrosome reaction,GO:0060054--positive regulation of epithelial cell proliferation involved in wound healing,GO:0060055--angiogenesis involved in wound healing,GO:0060058--positive regulation of apoptotic process involved in mammary gland involution,                                                                                                                                                                                                                   |
| DistUt | DOWN | ANXA5   | annexin A5(ANXA5)                                                                              | GO:002230--positive regulation of defense response to virus by host,GO:0010033--response to organic substance,GO:0050819--negative regulation of coagulation,GO:0098779--mitophagy in response to mitochondrial depolarization,GO:0098792--xenophagy,                                                                                                                                                                                                                                                                                                                                                                                                                                                                                                                                                                                                                                                                                                                                                                                                                                                                                                                                     |
| DistUt | DOWN | GCNT3   | glucosaminyl (N-acetyl) transferase 3, mucin type(GCNT3)                                       | GO:002426--immunoglobulin production in mucosal tissue,GO:0048729--tissue morphogenesis,GO:0050892--intestinal absorption,GO:0060993--kidney morphogenesis,                                                                                                                                                                                                                                                                                                                                                                                                                                                                                                                                                                                                                                                                                                                                                                                                                                                                                                                                                                                                                               |
| DistUt | DOWN | ABCB1   | ATP-binding cassette, sub-family B (MDR/TAP), member 1(ABCB1)                                  | GO:002481--antigen processing and presentation of exogenous protein antigen via MHC class Ib, TAP-dependent,GO:002485--antigen processing and presentation of endogenous peptide antigen via MHC class I via ER pathway, TAP-dependent,GO:002489--antigen processing and presentation of endogenous peptide antigen via MHC class Ib via ER pathway, TAP-dependent,GO:002591--positive regulation of antigen processing and presentation of peptide antigen via MHC class I,GO:0055085--transmembrane transport,                                                                                                                                                                                                                                                                                                                                                                                                                                                                                                                                                                                                                                                                          |
| DistUt | DOWN | ME1     | malic enzyme 1(ME1)                                                                            | GO:0006090--pyruvate metabolic process,GO:0006108--malate metabolic process,GO:0009725--response to hormone,GO:0051262--protein tetramerization,GO:0055114--oxidation-reduction process,GO:1902031--regulation of NADP metabolic process,                                                                                                                                                                                                                                                                                                                                                                                                                                                                                                                                                                                                                                                                                                                                                                                                                                                                                                                                                 |
| DistUt | DOWN | NPR2    | natriuretic peptide receptor B/guanylate cyclase B (atrionatriuretic peptide receptor B)(NPR2) | GO:0006182--cGMP biosynthetic process,GO:0007168--receptor guanylyl cyclase signaling pathway,GO:0035556--intracellular signal transduction,GO:0044702--single organism reproductive process,GO:0051447--negative regulation of meiotic cell cycle,GO:0060348--bone development,GO:0097011--cellular response to granulocyte macrophage colony-stimulating factor stimulus,GO:1900194--negative regulation of oocyte maturation,                                                                                                                                                                                                                                                                                                                                                                                                                                                                                                                                                                                                                                                                                                                                                          |
| DistUt | DOWN | HOXA10  | homeobox A10(HOXA10)                                                                           | GO:0006355--regulation of transcription, DNA-templated,                                                                                                                                                                                                                                                                                                                                                                                                                                                                                                                                                                                                                                                                                                                                                                                                                                                                                                                                                                                                                                                                                                                                   |
| DistUt | DOWN | HOXA10  | homeobox A10(HOXA10)                                                                           | GO:0006355--regulation of transcription, DNA-templated,                                                                                                                                                                                                                                                                                                                                                                                                                                                                                                                                                                                                                                                                                                                                                                                                                                                                                                                                                                                                                                                                                                                                   |
| DistUt | DOWN | VGLL3   | vestigial like family member 3(VGLL3)                                                          | GO:0006355--regulation of transcription, DNA-templated,                                                                                                                                                                                                                                                                                                                                                                                                                                                                                                                                                                                                                                                                                                                                                                                                                                                                                                                                                                                                                                                                                                                                   |
| DistUt | DOWN | MAGED1  | MAGE family member D1(MAGED1)                                                                  | GO:0006357--regulation of transcription from RNA polymerase II promoter,GO:0032922--circadian regulation of gene expression,GO:0042752--regulation of circadian rhythm,GO:0042981--regulation of apoptotic process,GO:0043406--positive regulation of MAP kinase activity,GO:0045892--negative regulation of transcription, DNA-templated,GO:0045893--positive regulation of transcription, DNA-templated,GO:0050680--negative regulation of epithelial cell proliferation,GO:0090190--positive regulation of branching involved in ureteric bud morphogenesis,GO:2001235--positive regulation of apoptotic signaling pathway,                                                                                                                                                                                                                                                                                                                                                                                                                                                                                                                                                            |
| DistUt | DOWN | ZNF516  | zinc finger protein 516(ZNF516)                                                                | GO:0006366--transcription from RNA polymerase II promoter,GO:0007165--signal transduction,GO:0007275--multicellular organism development,GO:0009409--response to cold,GO:0045893--positive regulation of transcription, DNA-templated,GO:0050873--brown fat cell differentiation,GO:0060612--adipose tissue development,                                                                                                                                                                                                                                                                                                                                                                                                                                                                                                                                                                                                                                                                                                                                                                                                                                                                  |
| DistUt | DOWN | ELL2    | elongation factor for RNA polymerase II 2(ELL2)                                                | GO:0006368--transcription elongation from RNA polymerase II promoter,GO:0042795--snRNA transcription from RNA polymerase II promoter,                                                                                                                                                                                                                                                                                                                                                                                                                                                                                                                                                                                                                                                                                                                                                                                                                                                                                                                                                                                                                                                     |
| DistUt | DOWN | PDIA3   | protein disulfide isomerase family A member 3(PDIA3)                                           | GO:0006457--protein folding,GO:0034976--response to endoplasmic reticulum stress,GO:0045454--cell redox homeostasis,GO:2001238--positive regulation of extrinsic apoptotic signaling pathway,                                                                                                                                                                                                                                                                                                                                                                                                                                                                                                                                                                                                                                                                                                                                                                                                                                                                                                                                                                                             |
| DistUt | DOWN | ERO1A   | endoplasmic reticulum oxidoreductase 1 alpha(ERO1A)                                            | GO:0006464--cellular protein modification process,GO:0019471--4-hydroxyproline metabolic process,GO:0022417--protein maturation by protein folding,GO:0030198--extracellular matrix organization,GO:0030968--endoplasmic reticulum unfolded protein response,GO:0034975--protein folding in endoplasmic reticulum,GO:0034976--response to endoplasmic reticulum stress,GO:0045454--cell redox homeostasis,GO:0050873--brown fat cell differentiation,GO:0051085--chaperone mediated protein folding requiring cofactor,GO:0051209--release of sequestered calcium ion into cytosol,GO:0055114--oxidation-reduction process,GO:0070059--intrinsic apoptotic signaling pathway in response to endoplasmic reticulum stress,                                                                                                                                                                                                                                                                                                                                                                                                                                                                 |
| DistUt | DOWN | DCN     | decorin(DCN)                                                                                   | GO:0006469--negative regulation of protein kinase activity,GO:0010596--negative regulation of endothelial cell migration,GO:0014068--positive regulation of phosphatidylinositol 3-kinase signaling,GO:0016239--positive regulation of macroautophagy,GO:0016525--negative regulation of angiogenesis,GO:0019221--cytokine-mediated signaling pathway,GO:0019800--peptide cross-linking via chondroitin 4-sulfate glycosaminoglycan,GO:0045944--positive regulation of transcription from RNA polymerase II promoter,GO:0046426--negative regulation of JAK-STAT cascade,GO:0051901--positive regulation of mitochondrial depolarization,GO:0090141--positive regulation of mitochondrial fission,GO:1900747--negative regulation of vascular endothelial growth factor signaling pathway,                                                                                                                                                                                                                                                                                                                                                                                                |
| DistUt | DOWN | NCEH1   | neutral cholesterol ester hydrolase 1(NCEH1)                                                   | GO:0006470--protein dephosphorylation,GO:0006805--xenobiotic metabolic process,GO:0009056--catabolic process,GO:0060395--5MAD protein signal transduction,                                                                                                                                                                                                                                                                                                                                                                                                                                                                                                                                                                                                                                                                                                                                                                                                                                                                                                                                                                                                                                |
| DistUt | DOWN | ARF4    | ADP ribosylation factor 4(ARF4)                                                                | GO:0006471--protein ADP-ribosylation,GO:0006890--retrograde vesicle-mediated transport, Golgi to ER,GO:0007264--small GTPase mediated signal transduction,GO:0007612--learning,GO:0016477--cell migration,GO:0031584--activation of phospholipase D activity,GO:0043066--negative regulation of apoptotic process,GO:0045176--apical protein localization,GO:0045197--establishment or maintenance of epithelial cell apical/basal polarity,GO:0045944--positive regulation of transcription from RNA polymerase II promoter,GO:0060996--dendritic spine development,GO:0061512--protein localization to cilium,GO:2000377--regulation of reactive oxygen species metabolic process,                                                                                                                                                                                                                                                                                                                                                                                                                                                                                                      |
| DistUt | DOWN | B3GALT2 | beta-1,3-galactosyltransferase 2(B3GALT2)                                                      | GO:0006486--protein glycosylation,GO:0009312--oligosaccharide biosynthetic process,                                                                                                                                                                                                                                                                                                                                                                                                                                                                                                                                                                                                                                                                                                                                                                                                                                                                                                                                                                                                                                                                                                       |
| DistUt | DOWN | EDEM3   | ER degradation enhancing alpha-mannosidase like protein 3(EDEM3)                               | GO:0006491--N-glycan processing,GO:0008152--metabolic process,GO:0030433--ER-associated ubiquitin-dependent protein catabolic process,GO:0030968--endoplasmic reticulum unfolded protein response,GO:0097466--glycoprotein ERAD pathway,GO:1904382--mannose trimming involved in glycoprotein ERAD pathway,                                                                                                                                                                                                                                                                                                                                                                                                                                                                                                                                                                                                                                                                                                                                                                                                                                                                               |
| DistUt | DOWN | MMP1    | matrix metalloproteinase 1(MMP1)                                                               | GO:0006508--proteolysis,GO:0030574--collagen catabolic process,GO:0032461--positive regulation of protein oligomerization,                                                                                                                                                                                                                                                                                                                                                                                                                                                                                                                                                                                                                                                                                                                                                                                                                                                                                                                                                                                                                                                                |
| DistUt | DOWN | GCLM    | glutamate-cysteine ligase modifier subunit(GCLM)                                               | GO:0006534--cysteine metabolic process,GO:0006536--glutamate metabolic process,GO:0006750--glutathione biosynthetic process,GO:0006979--response to oxidative stress,GO:0008637--apoptotic mitochondrial changes,GO:0035229--positive regulation of glutamate-cysteine ligase activity,GO:0042493--response to drug,GO:0050880--regulation of blood vessel size,GO:0051900--regulation of mitochondrial depolarization,GO:2001237--negative regulation of extrinsic apoptotic signaling pathway,                                                                                                                                                                                                                                                                                                                                                                                                                                                                                                                                                                                                                                                                                          |

|        |      |              |                                                                      |                                                                                                                                                                                                                                                                                                                                                                                                                                                                                                                                                                                                                                                                                                                                                                                                                                                                                                                                                                                                                                |
|--------|------|--------------|----------------------------------------------------------------------|--------------------------------------------------------------------------------------------------------------------------------------------------------------------------------------------------------------------------------------------------------------------------------------------------------------------------------------------------------------------------------------------------------------------------------------------------------------------------------------------------------------------------------------------------------------------------------------------------------------------------------------------------------------------------------------------------------------------------------------------------------------------------------------------------------------------------------------------------------------------------------------------------------------------------------------------------------------------------------------------------------------------------------|
| DistUt | DOWN | KDEL3        | KDEL endoplasmic reticulum protein retention receptor 3(KDEL3)       | GO:0006621-protein retention in ER lumen,GO:0015031-protein transport,                                                                                                                                                                                                                                                                                                                                                                                                                                                                                                                                                                                                                                                                                                                                                                                                                                                                                                                                                         |
| DistUt | DOWN | HSD17B11     | hydroxysteroid 17-beta dehydrogenase 11(HSD17B11)                    | GO:0006710-androgen catabolic process,                                                                                                                                                                                                                                                                                                                                                                                                                                                                                                                                                                                                                                                                                                                                                                                                                                                                                                                                                                                         |
| DistUt | DOWN | SLCO2A1      | solute carrier organic anion transporter family, member 2A1(SLCO2A1) | GO:0006811-ion transport,                                                                                                                                                                                                                                                                                                                                                                                                                                                                                                                                                                                                                                                                                                                                                                                                                                                                                                                                                                                                      |
| DistUt | DOWN | SLC39A7      | solute carrier family 39 member 7(SLC39A7)                           | GO:0006829-zinc II ion transport,GO:0055085-transmembrane transport,                                                                                                                                                                                                                                                                                                                                                                                                                                                                                                                                                                                                                                                                                                                                                                                                                                                                                                                                                           |
| DistUt | DOWN | SLC38A1      | solute carrier family 38 member 1(SLC38A1)                           | GO:0006867-asparagine transport,GO:0006868-glutamine transport,GO:0015817-histidine transport,                                                                                                                                                                                                                                                                                                                                                                                                                                                                                                                                                                                                                                                                                                                                                                                                                                                                                                                                 |
| DistUt | DOWN | SEC23A       | Sec23 homolog A, coat complex II component(SEC23A)                   | GO:0006886-intracellular protein transport,GO:0006888-ER to Golgi vesicle-mediated transport,                                                                                                                                                                                                                                                                                                                                                                                                                                                                                                                                                                                                                                                                                                                                                                                                                                                                                                                                  |
| DistUt | DOWN | SEC23B       | Sec23 homolog B, coat complex II component(SEC23B)                   | GO:0006886-intracellular protein transport,GO:0006888-ER to Golgi vesicle-mediated transport,                                                                                                                                                                                                                                                                                                                                                                                                                                                                                                                                                                                                                                                                                                                                                                                                                                                                                                                                  |
| DistUt | DOWN | EXOC5        | exocyst complex component 5(EXOC5)                                   | GO:0006887-exocytosis,GO:0042384-cilium assembly,GO:0048278-vesicle docking,                                                                                                                                                                                                                                                                                                                                                                                                                                                                                                                                                                                                                                                                                                                                                                                                                                                                                                                                                   |
| DistUt | DOWN | HTR2A        | 5-hydroxytryptamine receptor 2A(HTR2A)                               | GO:0006939-smooth muscle contraction,GO:0007193-adenylate cyclase-inhibiting G-protein coupled receptor signaling pathway,GO:0007200-phospholipase C-activating G-protein coupled receptor signaling pathway,GO:0007202-activation of phospholipase C activity,GO:0007210-serotonin receptor signaling pathway,GO:0007268-chemical synaptic transmission,GO:0007610-behavior,GO:0010513-positive regulation of phosphatidylinositol biosynthetic process,GO:0014065-phosphatidylinositol 3-kinase signaling,GO:0033674-positive regulation of kinase activity,GO:0042493-response to drug,GO:0044380-protein localization to cytoskeleton,GO:0045600-positive regulation of fat cell differentiation,GO:0045821-positive regulation of glycolytic process,GO:0046883-regulation of hormone secretion,GO:0050731-positive regulation of peptidyl-tyrosine phosphorylation,GO:0050795-regulation of behavior,GO:0051209-release of sequestered calcium ion into cytosol,GO:0070374-positive regulation of ERK1 and ERK2 cascade, |
| DistUt | DOWN | PTGFR        | prostaglandin F receptor(PTGFR)                                      | GO:0006954-inflammatory response,GO:0007189-adenylate cyclase-activating G-protein coupled receptor signaling pathway,GO:0007204-positive regulation of cytosolic calcium ion concentration,GO:0008284-positive regulation of cell proliferation,GO:0010628-positive regulation of gene expression,GO:0032355-response to estradiol,GO:0032496-response to lipopolysaccharide,GO:0035584-calcium-mediated signaling using intracellular calcium source,GO:0043066-negative regulation of apoptotic process,GO:0071799-cellular response to prostaglandin D stimulus,                                                                                                                                                                                                                                                                                                                                                                                                                                                           |
| DistUt | DOWN | HRH1         | histamine receptor H1(HRH1)                                          | GO:0006954-inflammatory response,GO:0007200-phospholipase C-activating G-protein coupled receptor signaling pathway,GO:0007613-memory,GO:0008542-visual learning,GO:0019229-regulation of vasoconstriction,GO:0043114-regulation of vascular permeability,GO:0045907-positive regulation of vasoconstriction,GO:0048167-regulation of synaptic plasticity,GO:0048245-eosinophil chemotaxis,GO:0050804-modulation of synaptic transmission,                                                                                                                                                                                                                                                                                                                                                                                                                                                                                                                                                                                     |
| DistUt | DOWN | RP56KA6      | ribosomal protein S6 kinase A6(RP56KA6)                              | GO:0006978-DNA damage response, signal transduction by p53 class mediator resulting in transcription of p21 class mediator,GO:0035556-intracellular signal transduction,                                                                                                                                                                                                                                                                                                                                                                                                                                                                                                                                                                                                                                                                                                                                                                                                                                                       |
| DistUt | DOWN | GPX8         | glutathione peroxidase 8 (putative)(GPX8)                            | GO:0006979-response to oxidative stress,                                                                                                                                                                                                                                                                                                                                                                                                                                                                                                                                                                                                                                                                                                                                                                                                                                                                                                                                                                                       |
| DistUt | DOWN | KIFAP3       | kinesin associated protein 3(KIFAP3)                                 | GO:0007017-microtubule-based process,GO:0008104-protein localization,GO:0008285-negative regulation of cell proliferation,GO:0043066-negative regulation of apoptotic process,GO:0046587-positive regulation of calcium-dependent cell-cell adhesion,                                                                                                                                                                                                                                                                                                                                                                                                                                                                                                                                                                                                                                                                                                                                                                          |
| DistUt | DOWN | ATP8B2       | ATPase phospholipid transporting 8B2(ATP8B2)                         | GO:0007030-Golgi organization,                                                                                                                                                                                                                                                                                                                                                                                                                                                                                                                                                                                                                                                                                                                                                                                                                                                                                                                                                                                                 |
| DistUt | DOWN | CLDN11       | claudin 11(CLDN11)                                                   | GO:0007155-cell adhesion,GO:0007283-spermatogenesis,GO:0008366-axon ensheathment,                                                                                                                                                                                                                                                                                                                                                                                                                                                                                                                                                                                                                                                                                                                                                                                                                                                                                                                                              |
| DistUt | DOWN | LOC100520265 | protocadherin-9(LOC100520265)                                        | GO:0007156-homophilic cell adhesion via plasma membrane adhesion molecules,                                                                                                                                                                                                                                                                                                                                                                                                                                                                                                                                                                                                                                                                                                                                                                                                                                                                                                                                                    |
| DistUt | DOWN | CDH11        | cadherin 11(CDH11)                                                   | GO:0007156-homophilic cell adhesion via plasma membrane adhesion molecules,GO:0021957-corticospinal tract morphogenesis,                                                                                                                                                                                                                                                                                                                                                                                                                                                                                                                                                                                                                                                                                                                                                                                                                                                                                                       |
| DistUt | DOWN | ALCAM        | activated leukocyte cell adhesion molecule(ALCAM)                    | GO:0007157-heterophilic cell-cell adhesion via plasma membrane cell adhesion molecules,GO:0008045-motor neuron axon guidance,                                                                                                                                                                                                                                                                                                                                                                                                                                                                                                                                                                                                                                                                                                                                                                                                                                                                                                  |
| DistUt | DOWN | COL3A1       | collagen type III alpha 1 chain(COL3A1)                              | GO:0007160-cell-matrix adhesion,GO:0007179-transforming growth factor beta receptor signaling pathway,GO:0007229-integrin-mediated signaling pathway,GO:0007507-heart development,GO:0009314-response to radiation,GO:0018149-peptide cross-linking,GO:0021987-cerebral cortex development,GO:0030199-collagen fibril organization,GO:0034097-response to cytokine,GO:0035025-positive regulation of Rho protein signal transduction,GO:0042060-wound healing,GO:0043206-extracellular fibril organization,GO:0043588-skin development,GO:0048565-digestive tract development,GO:0050777-negative regulation of immune response,GO:0060414-aorta smooth muscle tissue morphogenesis,GO:0071230-cellular response to amino acid stimulus,GO:001223-negative regulation of neuron migration,                                                                                                                                                                                                                                     |
| DistUt | DOWN | ARHGAP28     | Rho GTPase activating protein 28(ARHGAP28)                           | GO:0007165-signal transduction,                                                                                                                                                                                                                                                                                                                                                                                                                                                                                                                                                                                                                                                                                                                                                                                                                                                                                                                                                                                                |
| DistUt | DOWN | GUCY1B3      | guanylate cyclase 1, soluble, beta 3(GUCY1B3)                        | GO:0007165-signal transduction,GO:0035556-intracellular signal transduction,                                                                                                                                                                                                                                                                                                                                                                                                                                                                                                                                                                                                                                                                                                                                                                                                                                                                                                                                                   |
| DistUt | DOWN | SPARC        | secreted protein, acidic, cysteine-rich (osteonectin)(SPARC)         | GO:0007165-signal transduction,GO:0048856-anatomical structure development,                                                                                                                                                                                                                                                                                                                                                                                                                                                                                                                                                                                                                                                                                                                                                                                                                                                                                                                                                    |
| DistUt | DOWN | TSPAN9       | tetraspanin 9(TSPAN9)                                                | GO:0007166-cell surface receptor signaling pathway,                                                                                                                                                                                                                                                                                                                                                                                                                                                                                                                                                                                                                                                                                                                                                                                                                                                                                                                                                                            |
| DistUt | DOWN | LOC100157704 | olfactory receptor 1L8-like(LOC100157704)                            | GO:0007186-G-protein coupled receptor signaling pathway,GO:0050907-detection of chemical stimulus involved in sensory perception,                                                                                                                                                                                                                                                                                                                                                                                                                                                                                                                                                                                                                                                                                                                                                                                                                                                                                              |
| DistUt | DOWN | GNAI1        | G protein subunit alpha 1i(GNAI1)                                    | GO:0007188-adenylate cyclase-modulating G-protein coupled receptor signaling pathway,GO:0051301-cell division,                                                                                                                                                                                                                                                                                                                                                                                                                                                                                                                                                                                                                                                                                                                                                                                                                                                                                                                 |
| DistUt | DOWN | TAC3         | tachykinin 3(TAC3)                                                   | GO:0007217-tachykinin receptor signaling pathway,GO:0007218-neuropeptide signaling pathway,                                                                                                                                                                                                                                                                                                                                                                                                                                                                                                                                                                                                                                                                                                                                                                                                                                                                                                                                    |
| DistUt | DOWN | RASL12       | RAS like family 12(RASL12)                                           | GO:0007264-small GTPase mediated signal transduction,                                                                                                                                                                                                                                                                                                                                                                                                                                                                                                                                                                                                                                                                                                                                                                                                                                                                                                                                                                          |
| DistUt | DOWN | RND3         | Rho family GTPase 3(RND3)                                            | GO:0007264-small GTPase mediated signal transduction,                                                                                                                                                                                                                                                                                                                                                                                                                                                                                                                                                                                                                                                                                                                                                                                                                                                                                                                                                                          |
| DistUt | DOWN | ABHD2        | abhydrolase domain containing 2(ABHD2)                               | GO:0007340-acrosome reaction,GO:0009611-response to wounding,GO:0030336-negative regulation of cell migration,GO:0032570-response to progesterone,GO:0046464-acylglycerol catabolic process,GO:0048240-sperm capacitation,                                                                                                                                                                                                                                                                                                                                                                                                                                                                                                                                                                                                                                                                                                                                                                                                     |
| DistUt | DOWN | BICC1        | BicC family RNA binding protein 1(BICC1)                             | GO:0007368-determination of left/right symmetry,GO:0007507-heart development,GO:0090090-negative regulation of canonical Wnt signaling pathway,                                                                                                                                                                                                                                                                                                                                                                                                                                                                                                                                                                                                                                                                                                                                                                                                                                                                                |
| DistUt | DOWN | CFL2         | cofilin 2(CFL2)                                                      | GO:0007519-skeletal muscle tissue development,GO:0030042-actin filament depolymerization,GO:0030043-actin filament fragmentation,GO:0030836-positive regulation of actin filament depolymerization,GO:0045214-sarcomere organization,GO:0046716-muscle cell cellular homeostasis,                                                                                                                                                                                                                                                                                                                                                                                                                                                                                                                                                                                                                                                                                                                                              |
| DistUt | DOWN | MORC3        | MORC family CW-type zinc finger 3(MORC3)                             | GO:0007569-cell aging,GO:0009791-post-embryonic development,GO:0018105-peptidyl-serine phosphorylation,GO:0048147-negative regulation of fibroblast proliferation,GO:0050821-protein stabilization,GO:0051457-maintenance of protein location in nucleus,                                                                                                                                                                                                                                                                                                                                                                                                                                                                                                                                                                                                                                                                                                                                                                      |
| DistUt | DOWN | AFF2         | AF4/FMR2 family member 2(AFF2)                                       | GO:0007611-learning or memory,GO:0043484-regulation of RNA splicing,                                                                                                                                                                                                                                                                                                                                                                                                                                                                                                                                                                                                                                                                                                                                                                                                                                                                                                                                                           |
| DistUt | DOWN | EPHA4        | EPH receptor A4(EPHA4)                                               | GO:0007628-adult walking behavior,GO:0008045-motor neuron axon guidance,GO:0018108-peptidyl-tyrosine phosphorylation,GO:0021957-corticospinal tract morphogenesis,GO:0043507-positive regulation of JUN kinase activity,GO:0046777-protein autophosphorylation,GO:0048681-negative regulation of axon regeneration,GO:0048710-regulation of astrocyte differentiation,GO:0050770-regulation of axonogenesis,GO:0061001-regulation of dendritic spine morphogenesis,GO:0072178-nephric duct morphogenesis,GO:0097153-fasciculation of sensory neuron axon,GO:0097156-fasciculation of motor neuron axon,GO:2001108-positive regulation of Rho guanyl-nucleotide exchange factor activity,                                                                                                                                                                                                                                                                                                                                       |
| DistUt | DOWN | PELO         | pelota homolog (Drosophila)(PELO)                                    | GO:0008283-cell proliferation,GO:0051276-chromosome organization,GO:0070481-nuclear-transcribed mRNA catabolic process, non-stop decay,GO:0070966-nuclear-transcribed mRNA catabolic process, no-go decay,GO:0071025-RNA surveillance,                                                                                                                                                                                                                                                                                                                                                                                                                                                                                                                                                                                                                                                                                                                                                                                         |
| DistUt | DOWN | CD248        | CD248 molecule(CD248)                                                | GO:0008284-positive regulation of cell proliferation,GO:0016477-cell migration,GO:0048535-lymph node development,GO:0060033-anatomical structure regression,GO:2000353-positive regulation of endothelial cell apoptotic process,                                                                                                                                                                                                                                                                                                                                                                                                                                                                                                                                                                                                                                                                                                                                                                                              |

|        |      |              |                                                                        |                                                                                                                                                                                                                                                                                                                                                                                                                                                                                                                                                                                                                                                                                                                               |
|--------|------|--------------|------------------------------------------------------------------------|-------------------------------------------------------------------------------------------------------------------------------------------------------------------------------------------------------------------------------------------------------------------------------------------------------------------------------------------------------------------------------------------------------------------------------------------------------------------------------------------------------------------------------------------------------------------------------------------------------------------------------------------------------------------------------------------------------------------------------|
| DistUt | DOWN | FRZB         | frizzled-related protein(FRZB)                                         | GO:0008285-negative regulation of cell proliferation,GO:0010721-negative regulation of cell development,GO:0014033-neural crest cell differentiation,GO:0030308-negative regulation of cell growth,GO:0035567-non-canonical Wnt signaling pathway,GO:0043065-positive regulation of apoptotic process,GO:0045600-positive regulation of fat cell differentiation,GO:0060029-convergent extension involved in organogenesis,GO:0060070-canonical Wnt signaling pathway,GO:0061037-negative regulation of cartilage development,GO:0061053-somite development,GO:0070367-negative regulation of hepatocyte differentiation,GO:0090090-negative regulation of canonical Wnt signaling pathway,GO:0090103-cochlea morphogenesis,  |
| DistUt | DOWN | ADAM22       | ADAM metalloproteinase domain 22(ADAM22)                               | GO:0008344-adult locomotory behavior,GO:0022011-myelination in peripheral nervous system,                                                                                                                                                                                                                                                                                                                                                                                                                                                                                                                                                                                                                                     |
| DistUt | DOWN | FGF2         | fibroblast growth factor 2(FGF2)                                       | GO:0008543-fibroblast growth factor receptor signaling pathway,                                                                                                                                                                                                                                                                                                                                                                                                                                                                                                                                                                                                                                                               |
| DistUt | DOWN | TVP23B       | trans-golgi network vesicle protein 23 homolog B(TVP23B)               | GO:0009306-protein secretion,GO:0016192-vesicle-mediated transport,                                                                                                                                                                                                                                                                                                                                                                                                                                                                                                                                                                                                                                                           |
| DistUt | DOWN | SLC30A7      | solute carrier family 30 member 7(SLC30A7)                             | GO:0010043-response to zinc ion,GO:0032119-sequestering of zinc ion,GO:0061088-regulation of sequestering of zinc ion,                                                                                                                                                                                                                                                                                                                                                                                                                                                                                                                                                                                                        |
| DistUt | DOWN | AGR2         | anterior gradient 2, protein disulphide isomerase family member(AGR2)  | GO:0010628-positive regulation of gene expression,GO:0010811-positive regulation of cell-substrate adhesion,GO:0030154-cell differentiation,GO:0045742-positive regulation of epidermal growth factor receptor signaling pathway,GO:0048546-digestive tract morphogenesis,GO:0048639-positive regulation of developmental growth,GO:0060480-lung goblet cell differentiation,GO:0060548-negative regulation of cell death,GO:0070254-mucus secretion,GO:0090004-positive regulation of establishment of protein localization to plasma membrane,GO:1903896-positive regulation of IRE1-mediated unfolded protein response,GO:1903899-positive regulation of PERK-mediated unfolded protein response,                          |
| DistUt | DOWN | FAP          | fibroblast activation protein alpha(FAP)                               | GO:0010710-regulation of collagen catabolic process,GO:0010716-negative regulation of extracellular matrix disassembly,GO:0043542-endothelial cell migration,GO:0051603-proteolysis involved in cellular protein catabolic process,GO:0060244-negative regulation of cell proliferation involved in contact inhibition,GO:0071158-positive regulation of cell cycle arrest,GO:0071850-mitotic cell cycle arrest,GO:0097325-melanocyte proliferation,GO:1900119-positive regulation of execution phase of apoptosis,GO:1902362-melanocyte apoptotic process,                                                                                                                                                                   |
| DistUt | DOWN | MMP3         | matrix metalloproteinase 3 (stromelysin 1, progelatinase)(MMP3)        | GO:0010727-negative regulation of hydrogen peroxide metabolic process,GO:0032461-positive regulation of protein oligomerization,                                                                                                                                                                                                                                                                                                                                                                                                                                                                                                                                                                                              |
| DistUt | DOWN | IFRD1        | interferon related developmental regulator 1(IFRD1)                    | GO:0014706-striated muscle tissue development,GO:0030517-negative regulation of axon extension,GO:0042692-muscle cell differentiation,GO:0043403-skeletal muscle tissue regeneration,GO:0048671-negative regulation of collateral sprouting,                                                                                                                                                                                                                                                                                                                                                                                                                                                                                  |
| DistUt | DOWN | STEAP2       | STEAP2 metalloenductase(STEAP2)                                        | GO:0015677-copper ion import,GO:0097461-ferric iron import into cell,                                                                                                                                                                                                                                                                                                                                                                                                                                                                                                                                                                                                                                                         |
| DistUt | DOWN | CLINT1       | clathrin interactor 1(CLINT1)                                          | GO:0016192-vesicle-mediated transport,                                                                                                                                                                                                                                                                                                                                                                                                                                                                                                                                                                                                                                                                                        |
| DistUt | DOWN | SDC2         | syndecan 2(SDC2)                                                       | GO:0016477-cell migration,GO:0048813-dendrite morphogenesis,GO:0048814-regulation of dendrite morphogenesis,                                                                                                                                                                                                                                                                                                                                                                                                                                                                                                                                                                                                                  |
| DistUt | DOWN | FBXL5        | F-box and leucine rich repeat protein 5(FBXL5)                         | GO:0016567-protein ubiquitination,GO:0031146-SCF-dependent proteasomal ubiquitin-dependent protein catabolic process,GO:0055072-iron ion homeostasis,GO:1903364-positive regulation of cellular protein catabolic process,                                                                                                                                                                                                                                                                                                                                                                                                                                                                                                    |
| DistUt | DOWN | TGM2         | transglutaminase 2(TGM2)                                               | GO:0018149-peptide cross-linking,GO:0032471-negative regulation of endoplasmic reticulum calcium ion concentration,GO:0043065-positive regulation of apoptotic process,GO:0043277-apoptotic cell clearance,GO:0045785-positive regulation of cell adhesion,GO:0051561-positive regulation of mitochondrial calcium ion concentration,GO:0060445-branching involved in salivary gland morphogenesis,GO:0060662-salivary gland cavitation,                                                                                                                                                                                                                                                                                      |
| DistUt | DOWN | RCAN2        | regulator of calcineurin 2(RCAN2)                                      | GO:0019722-calcium-mediated signaling,GO:0070884-regulation of calcineurin-NFAT signaling cascade,                                                                                                                                                                                                                                                                                                                                                                                                                                                                                                                                                                                                                            |
| DistUt | DOWN | CRISPLD2     | cysteine rich secretory protein LCCL domain containing 2(CRISPLD2)     | GO:0030198-extracellular matrix organization,GO:0060325-face morphogenesis,                                                                                                                                                                                                                                                                                                                                                                                                                                                                                                                                                                                                                                                   |
| DistUt | DOWN | HSD11B1      | hydroxysteroid 11-beta dehydrogenase 1(HSD11B1)                        | GO:0030324-lung development,                                                                                                                                                                                                                                                                                                                                                                                                                                                                                                                                                                                                                                                                                                  |
| DistUt | DOWN | DNAJB9       | DnaJ heat shock protein family (Hsp40) member B9(DNAJB9)               | GO:0030433-ER-associated ubiquitin-dependent protein catabolic process,                                                                                                                                                                                                                                                                                                                                                                                                                                                                                                                                                                                                                                                       |
| DistUt | DOWN | ERLEC1       | endoplasmic reticulum lectin 1(ERLEC1)                                 | GO:0030433-ER-associated ubiquitin-dependent protein catabolic process,GO:0030970-retrograde protein transport, ER to cytosol,GO:1904153-negative regulation of retrograde protein transport, ER to cytosol,                                                                                                                                                                                                                                                                                                                                                                                                                                                                                                                  |
| DistUt | DOWN | OMD          | osteomodulin(OMD)                                                      | GO:0030500-regulation of bone mineralization,                                                                                                                                                                                                                                                                                                                                                                                                                                                                                                                                                                                                                                                                                 |
| DistUt | DOWN | PPP4R4       | protein phosphatase 4 regulatory subunit 4(PPP4R4)                     | GO:0032515-negative regulation of phosphoprotein phosphatase activity,GO:0080163-regulation of protein serine/threonine phosphatase activity,                                                                                                                                                                                                                                                                                                                                                                                                                                                                                                                                                                                 |
| DistUt | DOWN | ARMCX3       | armadillo repeat containing, X-linked 3(ARMCX3)                        | GO:0034613-cellular protein localization,GO:0045944-positive regulation of transcription from RNA polymerase II promoter,                                                                                                                                                                                                                                                                                                                                                                                                                                                                                                                                                                                                     |
| DistUt | DOWN | PLEKHA8      | pleckstrin homology domain containing A8(PLEKHA8)                      | GO:0035621-ER to Golgi ceramide transport,                                                                                                                                                                                                                                                                                                                                                                                                                                                                                                                                                                                                                                                                                    |
| DistUt | DOWN | PDP1         | pyruvate dehydrogenase phosphatase catalytic subunit 1(PDP1)           | GO:0035970-peptidyl-threonine dephosphorylation,                                                                                                                                                                                                                                                                                                                                                                                                                                                                                                                                                                                                                                                                              |
| DistUt | DOWN | ADAMTS5      | ADAM metalloproteinase with thrombospondin type 1 motif 5(ADAMTS5)     | GO:0042742-defense response to bacterium,                                                                                                                                                                                                                                                                                                                                                                                                                                                                                                                                                                                                                                                                                     |
| DistUt | DOWN | RNF11        | ring finger protein 11(RNF11)                                          | GO:0042787-protein ubiquitination involved in ubiquitin-dependent protein catabolic process,GO:0051865-protein autoubiquitination,                                                                                                                                                                                                                                                                                                                                                                                                                                                                                                                                                                                            |
| DistUt | DOWN | BRINP2       | BMP/retinoic acid inducible neural specific 2(BRINP2)                  | GO:0045666-positive regulation of neuron differentiation,GO:0045930-negative regulation of mitotic cell cycle,GO:0071300-cellular response to retinoic acid,                                                                                                                                                                                                                                                                                                                                                                                                                                                                                                                                                                  |
| DistUt | DOWN | FAM213A      | family with sequence similarity 213 member A(FAM213A)                  | GO:0045670-regulation of osteoclast differentiation,GO:0055114-oxidation-reduction process,                                                                                                                                                                                                                                                                                                                                                                                                                                                                                                                                                                                                                                   |
| DistUt | DOWN | MFAP2        | microfibrillar associated protein 2(MFAP2)                             | GO:0048048-embryonic eye morphogenesis,GO:0048050-post-embryonic eye morphogenesis,                                                                                                                                                                                                                                                                                                                                                                                                                                                                                                                                                                                                                                           |
| DistUt | DOWN | LOC100738373 | epidermal growth factor receptor kinase substrate 8-like(LOC100738373) | GO:0051016-barbed-end actin filament capping,GO:0051017-actin filament bundle assembly,                                                                                                                                                                                                                                                                                                                                                                                                                                                                                                                                                                                                                                       |
| DistUt | DOWN | KCTD9        | potassium channel tetramerization domain containing 9(KCTD9)           | GO:0051260-protein homooligomerization,                                                                                                                                                                                                                                                                                                                                                                                                                                                                                                                                                                                                                                                                                       |
| DistUt | DOWN | SLC41A2      | solute carrier family 41 member 2(SLC41A2)                             | GO:0055085-transmembrane transport,GO:0070838-divalent metal ion transport,                                                                                                                                                                                                                                                                                                                                                                                                                                                                                                                                                                                                                                                   |
| DistUt | DOWN | FKBP7        | FK506 binding protein 7(FKBP7)                                         | GO:0061077-chaperone-mediated protein folding,                                                                                                                                                                                                                                                                                                                                                                                                                                                                                                                                                                                                                                                                                |
| DistUt | DOWN | LOC100517015 | cAMP-dependent protein kinase inhibitor beta-like(LOC100517015)        | GO:2000480-negative regulation of cAMP-dependent protein kinase activity,                                                                                                                                                                                                                                                                                                                                                                                                                                                                                                                                                                                                                                                     |
| ProxUt | UP   | CALM1        | calmodulin 1(CALM1)                                                    | GO:0000086-G2/M transition of mitotic cell cycle,GO:0002027-regulation of heart rate,GO:0005513-detection of calcium ion,GO:0010880-regulation of release of sequestered calcium ion into cytosol by sarcoplasmic reticulum,GO:0021762-substantia nigra development,GO:0030801-positive regulation of cyclic nucleotide metabolic process,GO:0032465-regulation of cytokinesis,GO:0032516-positive regulation of phosphoprotein phosphatase activity,GO:0043388-positive regulation of DNA binding,GO:0051343-positive regulation of cyclic-nucleotide phosphodiesterase activity,GO:0055117-regulation of cardiac muscle contraction,GO:0060316-positive regulation of ryanodine-sensitive calcium-release channel activity, |
| ProxUt | UP   | JAZF1        | JAZF zinc finger 1(JAZF1)                                              | GO:0000122-negative regulation of transcription from RNA polymerase II promoter,                                                                                                                                                                                                                                                                                                                                                                                                                                                                                                                                                                                                                                              |

|        |    |         |                                                                        |                                                                                                                                                                                                                                                                                                                                                                                                                                                                                                                                                                                                                                                                                                                                                                                                                                                                                                                                                                                                                                                                                                                                                                                                                                                                                                                                                                                                                                                                                                                                                                                                                                                                   |
|--------|----|---------|------------------------------------------------------------------------|-------------------------------------------------------------------------------------------------------------------------------------------------------------------------------------------------------------------------------------------------------------------------------------------------------------------------------------------------------------------------------------------------------------------------------------------------------------------------------------------------------------------------------------------------------------------------------------------------------------------------------------------------------------------------------------------------------------------------------------------------------------------------------------------------------------------------------------------------------------------------------------------------------------------------------------------------------------------------------------------------------------------------------------------------------------------------------------------------------------------------------------------------------------------------------------------------------------------------------------------------------------------------------------------------------------------------------------------------------------------------------------------------------------------------------------------------------------------------------------------------------------------------------------------------------------------------------------------------------------------------------------------------------------------|
| ProxUt | UP | RREB1   | ras responsive element binding protein 1(RREB1)                        | GO:000122-negative regulation of transcription from RNA polymerase II promoter,GO:0006355-regulation of transcription, DNA-templated,GO:0006366-transcription from RNA polymerase II promoter,GO:0007165-signal transduction,GO:0007275-multicellular organism development,GO:0010634-positive regulation of epithelial cell migration,GO:0033601-positive regulation of mammary gland epithelial cell proliferation,GO:1900026-positive regulation of substrate adhesion-dependent cell spreading,GO:1903691-positive regulation of wound healing, spreading of epidermal cells,GO:2000394-positive regulation of lamellipodium morphogenesis,                                                                                                                                                                                                                                                                                                                                                                                                                                                                                                                                                                                                                                                                                                                                                                                                                                                                                                                                                                                                                   |
| ProxUt | UP | MAPT    | microtubule associated protein tau(MAPT)                               | GO:000226-microtubule cytoskeleton organization,GO:0001764-neuron migration,GO:0007628-adult walking behavior,GO:0008088-axo-dendritic transport,GO:0010506-regulation of autophagy,GO:0031116-positive regulation of microtubule polymerization,GO:0031175-neuron projection development,GO:0032387-negative regulation of intracellular transport,GO:0045773-positive regulation of axon extension,GO:0047497-mitochondrion transport along microtubule,GO:0048675-axon extension,GO:0060632-regulation of microtubule-based movement,                                                                                                                                                                                                                                                                                                                                                                                                                                                                                                                                                                                                                                                                                                                                                                                                                                                                                                                                                                                                                                                                                                                          |
| ProxUt | UP | XAB2    | XPA binding protein 2(XAB2)                                            | GO:0000349-generation of catalytic spliceosome for first transesterification step,GO:0001824-blastocyst development,GO:0006283-transcription-coupled nucleotide-excision repair,GO:0006351-transcription, DNA-templated,                                                                                                                                                                                                                                                                                                                                                                                                                                                                                                                                                                                                                                                                                                                                                                                                                                                                                                                                                                                                                                                                                                                                                                                                                                                                                                                                                                                                                                          |
| ProxUt | UP | CELF4   | CUGBP, Elav-like family member 4(CELF4)                                | GO:000380-alternative mRNA splicing, via spliceosome,GO:000381-regulation of alternative mRNA splicing, via spliceosome,GO:0006376-mRNA splice site selection,GO:0048025-negative regulation of mRNA splicing, via spliceosome,GO:0048026-positive regulation of mRNA splicing, via spliceosome,GO:0090394-negative regulation of excitatory postsynaptic potential,GO:1902866-regulation of retina development in camera-type eye,                                                                                                                                                                                                                                                                                                                                                                                                                                                                                                                                                                                                                                                                                                                                                                                                                                                                                                                                                                                                                                                                                                                                                                                                                               |
| ProxUt | UP | HOXD12  | homeobox D12(HOXD12)                                                   | GO:0001501-skeletal system development,GO:0006355-regulation of transcription, DNA-templated,GO:0007389-pattern specification process,GO:0042733-embryonic digit morphogenesis,                                                                                                                                                                                                                                                                                                                                                                                                                                                                                                                                                                                                                                                                                                                                                                                                                                                                                                                                                                                                                                                                                                                                                                                                                                                                                                                                                                                                                                                                                   |
| ProxUt | UP | SP7     | Sp7 transcription factor(SF7)                                          | GO:0001649-osteoblast differentiation,GO:0045944-positive regulation of transcription from RNA polymerase II promoter,GO:0060218-hematopoietic stem cell differentiation,GO:2000738-positive regulation of stem cell differentiation,                                                                                                                                                                                                                                                                                                                                                                                                                                                                                                                                                                                                                                                                                                                                                                                                                                                                                                                                                                                                                                                                                                                                                                                                                                                                                                                                                                                                                             |
| ProxUt | UP | DEAF1   | DEAF1, transcription factor(DEAF1)                                     | GO:0001662-behavioral fear response,GO:0001843-neural tube closure,GO:0006357-regulation of transcription from RNA polymerase II promoter,GO:0006366-transcription from RNA polymerase II promoter,GO:0008542-visual learning,GO:0033599-regulation of mammary gland epithelial cell proliferation,GO:0045892-negative regulation of transcription, DNA-templated,GO:0045893-positive regulation of transcription, DNA-templated,GO:0048706-embryonic skeletal system development,GO:2000026-regulation of multicellular organismal development,                                                                                                                                                                                                                                                                                                                                                                                                                                                                                                                                                                                                                                                                                                                                                                                                                                                                                                                                                                                                                                                                                                                  |
| ProxUt | UP | ADRA2A  | adrenoceptor alpha 2A(ADRA2A)                                          | GO:0001819-positive regulation of cytokine production,GO:0006940-regulation of smooth muscle contraction,GO:0007194-negative regulation of adenylate cyclase activity,GO:0007267-cell-cell signaling,GO:0019229-regulation of vasoconstriction,GO:0030168-platelet activation,GO:0030335-positive regulation of cell migration,GO:0030818-negative regulation of cAMP biosynthetic process,GO:0032148-activation of protein kinase B activity,GO:0032870-cellular response to hormone stimulus,GO:0035625-epidermal growth factor-activated receptor transactivation by G-protein coupled receptor signaling pathway,GO:0042593-glucose homeostasis,GO:0043268-positive regulation of potassium ion transport,GO:0050995-negative regulation of lipid catabolic process,GO:0051044-positive regulation of membrane protein ectodomain proteolysis,GO:0051926-negative regulation of calcium ion transport,GO:0061179-negative regulation of insulin secretion involved in cellular response to glucose stimulus,GO:0071878-negative regulation of adrenergic receptor signaling pathway,GO:0071880-adenylate cyclase-activating adrenergic receptor signaling pathway,GO:0071881-adenylate cyclase-inhibiting adrenergic receptor signaling pathway,GO:0071882-phospholipase C-activating adrenergic receptor signaling pathway,GO:0071883-activation of MAPK activity by adrenergic receptor signaling pathway,GO:0090303-positive regulation of wound healing,GO:1901020-negative regulation of calcium ion transmembrane transporter activity,                                                                                                                 |
| ProxUt | UP | HSF1    | heat shock transcription factor 1(HSF1)                                | GO:0001892-embryonic placenta development,GO:0006468-protein phosphorylation,GO:0007143-female meiotic division,GO:0007283-spermatogenesis,GO:0008285-negative regulation of cell proliferation,GO:0009299-mRNA transcription,GO:0032496-response to lipopolysaccharide,GO:0032720-negative regulation of tumor necrosis factor production,GO:0034605-cellular response to heat,GO:0040018-positive regulation of multicellular organism growth,GO:0045944-positive regulation of transcription from RNA polymerase II promoter,GO:0060136-embryonic process involved in female pregnancy,                                                                                                                                                                                                                                                                                                                                                                                                                                                                                                                                                                                                                                                                                                                                                                                                                                                                                                                                                                                                                                                                        |
| ProxUt | UP | STK11   | serine/threonine kinase 11(STK11)                                      | GO:0001894-tissue homeostasis,GO:0001944-vasculature development,GO:0006468-protein phosphorylation,GO:0006974-cellular response to DNA damage stimulus,GO:0007050-cell cycle arrest,GO:0007286-spermatid development,GO:0007409-axonogenesis,GO:0010212-response to ionizing radiation,GO:0010508-positive regulation of autophagy,GO:0030010-establishment of cell polarity,GO:0030111-regulation of Wnt signaling pathway,GO:0030308-negative regulation of cell growth,GO:0030511-positive regulation of transforming growth factor beta receptor signaling pathway,GO:0036399-TCR signalosome assembly,GO:0042593-glucose homeostasis,GO:0043276-anoikis,GO:0045059-positive thymic T cell selection,GO:0046777-protein autophosphorylation,GO:0048814-regulation of dendrite morphogenesis,GO:0050731-positive regulation of peptidyl-tyrosine phosphorylation,GO:0050772-positive regulation of axonogenesis,GO:0050852-T cell receptor signaling pathway,GO:0051055-negative regulation of lipid biosynthetic process,GO:0051645-Golgi localization,GO:0051896-regulation of protein kinase B signaling,GO:0060070-canonical Wnt signaling pathway,GO:0060770-negative regulation of epithelial cell proliferation involved in prostate gland development,GO:0071493-cellular response to UV-B,GO:0071902-positive regulation of protein serine/threonine kinase activity,GO:0072332-intrinsic apoptotic signaling pathway by p53 class mediator,GO:0097484-dendrite extension,GO:1900182-positive regulation of protein localization to nucleus,GO:1904262-negative regulation of TORC1 signaling,GO:2000774-positive regulation of cellular senescence, |
| ProxUt | UP | ADRA1A  | adrenoceptor alpha 1A(ADRA1A)                                          | GO:0001985-negative regulation of heart rate involved in baroreceptor response to increased systemic arterial blood pressure,GO:0001994-norepinephrine-epinephrine vasoconstriction involved in regulation of systemic arterial blood pressure,GO:0001996-positive regulation of heart rate by epinephrine-norepinephrine,GO:0001997-positive regulation of the force of heart contraction by epinephrine-norepinephrine,GO:0007200-phospholipase C-activating G-protein coupled receptor signaling pathway,GO:0007204-positive regulation of cytosolic calcium ion concentration,GO:0007267-cell-cell signaling,GO:0007512-adult heart development,GO:0016049-cell growth,GO:0035265-organ growth,GO:0043410-positive regulation of MAPK cascade,GO:0045907-positive regulation of vasoconstriction,GO:0045987-positive regulation of smooth muscle contraction,GO:0055117-regulation of cardiac muscle contraction,GO:0071880-adenylate cyclase-activating adrenergic receptor signaling pathway,GO:0097195-pilomotor reflex,                                                                                                                                                                                                                                                                                                                                                                                                                                                                                                                                                                                                                                   |
| ProxUt | UP | LIM2    | lens intrinsic membrane protein 2(LIM2)                                | GO:0002088-lens development in camera-type eye,                                                                                                                                                                                                                                                                                                                                                                                                                                                                                                                                                                                                                                                                                                                                                                                                                                                                                                                                                                                                                                                                                                                                                                                                                                                                                                                                                                                                                                                                                                                                                                                                                   |
| ProxUt | UP | CHST4   | carbohydrate sulfotransferase 4(CHST4)                                 | GO:005975-carbohydrate metabolic process,GO:0006044-N-acetylglucosamine metabolic process,GO:0006477-protein sulfation,                                                                                                                                                                                                                                                                                                                                                                                                                                                                                                                                                                                                                                                                                                                                                                                                                                                                                                                                                                                                                                                                                                                                                                                                                                                                                                                                                                                                                                                                                                                                           |
| ProxUt | UP | ALDH2   | aldehyde dehydrogenase 2 family (mitochondrial)(ALDH2)                 | GO:0006068-ethanol catabolic process,GO:0055114-oxidation-reduction process,                                                                                                                                                                                                                                                                                                                                                                                                                                                                                                                                                                                                                                                                                                                                                                                                                                                                                                                                                                                                                                                                                                                                                                                                                                                                                                                                                                                                                                                                                                                                                                                      |
| ProxUt | UP | DDB1    | damage specific DNA binding protein 1(DDB1)                            | GO:0006289-nucleotide-excision repair,GO:0016055-Wnt signaling pathway,GO:0035518-histone H2A monoubiquitination,GO:0042787-protein ubiquitination involved in ubiquitin-dependent protein catabolic process,GO:0043066-negative regulation of apoptotic process,GO:0043161-proteasome-mediated ubiquitin-dependent protein catabolic process,GO:0045070-positive regulation of viral genome replication,GO:0046726-positive regulation by virus of viral protein levels in host cell,GO:0051702-interaction with symbiont,GO:0070914-UV-damage excision repair,GO:1901990-regulation of mitotic cell cycle phase transition,GO:1902188-positive regulation of viral release from host cell,                                                                                                                                                                                                                                                                                                                                                                                                                                                                                                                                                                                                                                                                                                                                                                                                                                                                                                                                                                      |
| ProxUt | UP | MLXIP   | MLX interacting protein(MLXIP)                                         | GO:0006357-regulation of transcription from RNA polymerase II promoter,GO:1900402-regulation of carbohydrate metabolic process by regulation of transcription from RNA polymerase II promoter,                                                                                                                                                                                                                                                                                                                                                                                                                                                                                                                                                                                                                                                                                                                                                                                                                                                                                                                                                                                                                                                                                                                                                                                                                                                                                                                                                                                                                                                                    |
| ProxUt | UP | RTN4RL1 | reticulon 4 receptor like 1(RTN4RL1)                                   | GO:0006469-negative regulation of protein kinase activity,GO:0019221-cytokine-mediated signaling pathway,GO:0046426-negative regulation of JAK-STAT cascade,                                                                                                                                                                                                                                                                                                                                                                                                                                                                                                                                                                                                                                                                                                                                                                                                                                                                                                                                                                                                                                                                                                                                                                                                                                                                                                                                                                                                                                                                                                      |
| ProxUt | UP | CRYL1   | crystallin lambda 1(CRYL1)                                             | GO:0006631-fatty acid metabolic process,GO:0055114-oxidation-reduction process,                                                                                                                                                                                                                                                                                                                                                                                                                                                                                                                                                                                                                                                                                                                                                                                                                                                                                                                                                                                                                                                                                                                                                                                                                                                                                                                                                                                                                                                                                                                                                                                   |
| ProxUt | UP | SERINC5 | serine incorporator 5(SERINC5)                                         | GO:0006658-phosphatidylserine metabolic process,GO:0006665-sphingolipid metabolic process,GO:0042552-myelination,                                                                                                                                                                                                                                                                                                                                                                                                                                                                                                                                                                                                                                                                                                                                                                                                                                                                                                                                                                                                                                                                                                                                                                                                                                                                                                                                                                                                                                                                                                                                                 |
| ProxUt | UP | SPR     | sepiapterin reductase (7,8-dihydrobiopterin:NADP+ oxidoreductase)(SPR) | GO:0006729-tetrahydrobiopterin biosynthetic process,GO:0006809-nitric oxide biosynthetic process,                                                                                                                                                                                                                                                                                                                                                                                                                                                                                                                                                                                                                                                                                                                                                                                                                                                                                                                                                                                                                                                                                                                                                                                                                                                                                                                                                                                                                                                                                                                                                                 |
| ProxUt | UP | PCBD1   | pterin-4 alpha-carbinolamine dehydratase 1(PCBD1)                      | GO:0006729-tetrahydrobiopterin biosynthetic process,GO:0051289-protein homotetramerization,GO:0051291-protein heterooligomerization,                                                                                                                                                                                                                                                                                                                                                                                                                                                                                                                                                                                                                                                                                                                                                                                                                                                                                                                                                                                                                                                                                                                                                                                                                                                                                                                                                                                                                                                                                                                              |
| ProxUt | UP | SLC35F1 | solute carrier family 35 member F1(SLC35F1)                            | GO:0006810-transport,                                                                                                                                                                                                                                                                                                                                                                                                                                                                                                                                                                                                                                                                                                                                                                                                                                                                                                                                                                                                                                                                                                                                                                                                                                                                                                                                                                                                                                                                                                                                                                                                                                             |
| ProxUt | UP | RHCG    | Rh family C glycoprotein(RHCG)                                         | GO:0006873-cellular ion homeostasis,GO:0006885-regulation of pH,GO:0015695-organic cation transport,GO:0015696-ammonium transport,GO:0019740-nitrogen utilization,GO:0070634-transepithelial ammonium transport,GO:0072488-ammonium transmembrane transport,                                                                                                                                                                                                                                                                                                                                                                                                                                                                                                                                                                                                                                                                                                                                                                                                                                                                                                                                                                                                                                                                                                                                                                                                                                                                                                                                                                                                      |

|        |      |              |                                                                       |                                                                                                                                                                                                                                                                                                                                                                                                                                                                                                                                                                                                                                                                                                                                                                                                                                                                                                                                                                                                                                                                                                                                                                                                                                                                                                                                                                                                                                                                                                                                                                                                                                                                                                                                                                                                                             |
|--------|------|--------------|-----------------------------------------------------------------------|-----------------------------------------------------------------------------------------------------------------------------------------------------------------------------------------------------------------------------------------------------------------------------------------------------------------------------------------------------------------------------------------------------------------------------------------------------------------------------------------------------------------------------------------------------------------------------------------------------------------------------------------------------------------------------------------------------------------------------------------------------------------------------------------------------------------------------------------------------------------------------------------------------------------------------------------------------------------------------------------------------------------------------------------------------------------------------------------------------------------------------------------------------------------------------------------------------------------------------------------------------------------------------------------------------------------------------------------------------------------------------------------------------------------------------------------------------------------------------------------------------------------------------------------------------------------------------------------------------------------------------------------------------------------------------------------------------------------------------------------------------------------------------------------------------------------------------|
| ProxUt | UP   | XK           | X-linked Kx blood group(XK)                                           | GO:0006874-cellular calcium ion homeostasis,GO:0008361-regulation of cell size,GO:0010961-cellular magnesium ion homeostasis,GO:0031133-regulation of axon diameter,GO:0042552-myelination,GO:0048741-skeletal muscle fiber development,                                                                                                                                                                                                                                                                                                                                                                                                                                                                                                                                                                                                                                                                                                                                                                                                                                                                                                                                                                                                                                                                                                                                                                                                                                                                                                                                                                                                                                                                                                                                                                                    |
| ProxUt | UP   | RNF152       | ring finger protein 152(RNF152)                                       | GO:0006915-apoptotic process,GO:0010508-positive regulation of autophagy,GO:0034198-cellular response to amino acid starvation,GO:0070534-protein K63-linked ubiquitination,GO:0070936-protein K48-linked ubiquitination,GO:1904262-negative regulation of TORC1 signaling,                                                                                                                                                                                                                                                                                                                                                                                                                                                                                                                                                                                                                                                                                                                                                                                                                                                                                                                                                                                                                                                                                                                                                                                                                                                                                                                                                                                                                                                                                                                                                 |
| ProxUt | UP   | IL17D        | interleukin 17D(IL17D)                                                | GO:0006954-inflammatory response,GO:0007166-cell surface receptor signaling pathway,                                                                                                                                                                                                                                                                                                                                                                                                                                                                                                                                                                                                                                                                                                                                                                                                                                                                                                                                                                                                                                                                                                                                                                                                                                                                                                                                                                                                                                                                                                                                                                                                                                                                                                                                        |
| ProxUt | UP   | LOC100737805 | SUN domain-containing protein 1-like(LOC100737805)                    | GO:0006998-nuclear envelope organization,GO:0090286-cytoskeletal anchoring at nuclear membrane,                                                                                                                                                                                                                                                                                                                                                                                                                                                                                                                                                                                                                                                                                                                                                                                                                                                                                                                                                                                                                                                                                                                                                                                                                                                                                                                                                                                                                                                                                                                                                                                                                                                                                                                             |
| ProxUt | UP   | CHCHD10      | coiled-coil-helix-coiled-coil-helix domain containing 10(CHCHD10)     | GO:0007005-mitochondrion organization,                                                                                                                                                                                                                                                                                                                                                                                                                                                                                                                                                                                                                                                                                                                                                                                                                                                                                                                                                                                                                                                                                                                                                                                                                                                                                                                                                                                                                                                                                                                                                                                                                                                                                                                                                                                      |
| ProxUt | UP   | TMSB4X       | thymosin beta 4, X-linked(TMSB4X)                                     | GO:0007015-actin filament organization,                                                                                                                                                                                                                                                                                                                                                                                                                                                                                                                                                                                                                                                                                                                                                                                                                                                                                                                                                                                                                                                                                                                                                                                                                                                                                                                                                                                                                                                                                                                                                                                                                                                                                                                                                                                     |
| ProxUt | UP   | TMSB4X       | thymosin beta 4, X-linked(TMSB4X)                                     | GO:0007015-actin filament organization,GO:0030036-actin cytoskeleton organization,GO:0030334-regulation of cell migration,GO:0042989-sequestering of actin monomers,                                                                                                                                                                                                                                                                                                                                                                                                                                                                                                                                                                                                                                                                                                                                                                                                                                                                                                                                                                                                                                                                                                                                                                                                                                                                                                                                                                                                                                                                                                                                                                                                                                                        |
| ProxUt | UP   | CNTROB       | centrobin, centriole duplication and spindle assembly protein(CNTROB) | GO:0007099-centriole replication,GO:0051299-centrosome separation,GO:1902410-mitotic cytokinetic process,                                                                                                                                                                                                                                                                                                                                                                                                                                                                                                                                                                                                                                                                                                                                                                                                                                                                                                                                                                                                                                                                                                                                                                                                                                                                                                                                                                                                                                                                                                                                                                                                                                                                                                                   |
| ProxUt | UP   | GRK1         | G protein-coupled receptor kinase 1(GRK1)                             | GO:0007165-signal transduction,GO:0007601-visual perception,GO:0022400-regulation of rhodopsin mediated signaling pathway,GO:0046777-protein autophosphorylation,                                                                                                                                                                                                                                                                                                                                                                                                                                                                                                                                                                                                                                                                                                                                                                                                                                                                                                                                                                                                                                                                                                                                                                                                                                                                                                                                                                                                                                                                                                                                                                                                                                                           |
| ProxUt | UP   | VIPR1        | vasoactive intestinal peptide receptor 1(VIPR1)                       | GO:0007166-cell surface receptor signaling pathway,GO:0007186-G-protein coupled receptor signaling pathway,                                                                                                                                                                                                                                                                                                                                                                                                                                                                                                                                                                                                                                                                                                                                                                                                                                                                                                                                                                                                                                                                                                                                                                                                                                                                                                                                                                                                                                                                                                                                                                                                                                                                                                                 |
| ProxUt | UP   | LOC100516511 | olfactory receptor 1A1(LOC100516511)                                  | GO:0007186-G-protein coupled receptor signaling pathway,                                                                                                                                                                                                                                                                                                                                                                                                                                                                                                                                                                                                                                                                                                                                                                                                                                                                                                                                                                                                                                                                                                                                                                                                                                                                                                                                                                                                                                                                                                                                                                                                                                                                                                                                                                    |
| ProxUt | UP   | GPR26        | G protein-coupled receptor 26(GPR26)                                  | GO:0007189-adenylate cyclase-activating G-protein coupled receptor signaling pathway,GO:0031647-regulation of protein stability,GO:1903955-positive regulation of protein targeting to mitochondrion,                                                                                                                                                                                                                                                                                                                                                                                                                                                                                                                                                                                                                                                                                                                                                                                                                                                                                                                                                                                                                                                                                                                                                                                                                                                                                                                                                                                                                                                                                                                                                                                                                       |
| ProxUt | UP   | LOC100524975 | olfactory receptor 10H1(LOC100524975)                                 | GO:0007192-adenylate cyclase-activating serotonin receptor signaling pathway,GO:0007268-chemical synaptic transmission,                                                                                                                                                                                                                                                                                                                                                                                                                                                                                                                                                                                                                                                                                                                                                                                                                                                                                                                                                                                                                                                                                                                                                                                                                                                                                                                                                                                                                                                                                                                                                                                                                                                                                                     |
| ProxUt | UP   | RXFP4        | relaxin/insulin like family peptide receptor 4(RXFP4)                 | GO:0007200-phospholipase C-activating G-protein coupled receptor signaling pathway,GO:0007218-neuropeptide signaling pathway,GO:2000253-positive regulation of feeding behavior,                                                                                                                                                                                                                                                                                                                                                                                                                                                                                                                                                                                                                                                                                                                                                                                                                                                                                                                                                                                                                                                                                                                                                                                                                                                                                                                                                                                                                                                                                                                                                                                                                                            |
| ProxUt | UP   | KCNQ4        | potassium voltage-gated channel subfamily Q member 4(KCNQ4)           | GO:0007605-sensory perception of sound,GO:0042472-inner ear morphogenesis,                                                                                                                                                                                                                                                                                                                                                                                                                                                                                                                                                                                                                                                                                                                                                                                                                                                                                                                                                                                                                                                                                                                                                                                                                                                                                                                                                                                                                                                                                                                                                                                                                                                                                                                                                  |
| ProxUt | UP   | OTOGL        | otogelin like(OTOGL)                                                  | GO:0007605-sensory perception of sound,GO:0046373-L-arabinose metabolic process,                                                                                                                                                                                                                                                                                                                                                                                                                                                                                                                                                                                                                                                                                                                                                                                                                                                                                                                                                                                                                                                                                                                                                                                                                                                                                                                                                                                                                                                                                                                                                                                                                                                                                                                                            |
| ProxUt | UP   | ASGR2        | asialoglycoprotein receptor 2(ASGR2)                                  | GO:0009100-glycoprotein metabolic process,GO:0031647-regulation of protein stability,GO:0055088-lipid homeostasis,                                                                                                                                                                                                                                                                                                                                                                                                                                                                                                                                                                                                                                                                                                                                                                                                                                                                                                                                                                                                                                                                                                                                                                                                                                                                                                                                                                                                                                                                                                                                                                                                                                                                                                          |
| ProxUt | UP   | LOC100739011 | putative lipoyltransferase 2, mitochondrial(LOC100739011)             | GO:0009107-lipoate biosynthetic process,GO:0009249-protein lipoylation,                                                                                                                                                                                                                                                                                                                                                                                                                                                                                                                                                                                                                                                                                                                                                                                                                                                                                                                                                                                                                                                                                                                                                                                                                                                                                                                                                                                                                                                                                                                                                                                                                                                                                                                                                     |
| ProxUt | UP   | PGLYRP1      | peptidoglycan recognition protein 1(PGLYRP1)                          | GO:0009253-peptidoglycan catabolic process,GO:0045087-innate immune response,                                                                                                                                                                                                                                                                                                                                                                                                                                                                                                                                                                                                                                                                                                                                                                                                                                                                                                                                                                                                                                                                                                                                                                                                                                                                                                                                                                                                                                                                                                                                                                                                                                                                                                                                               |
| ProxUt | UP   | ADHFE1       | alcohol dehydrogenase, iron containing 1(ADHFE1)                      | GO:0015993-molecular hydrogen transport,                                                                                                                                                                                                                                                                                                                                                                                                                                                                                                                                                                                                                                                                                                                                                                                                                                                                                                                                                                                                                                                                                                                                                                                                                                                                                                                                                                                                                                                                                                                                                                                                                                                                                                                                                                                    |
| ProxUt | UP   | RHBDL1       | rhomboid like 1(RHBDL1)                                               | GO:0016485-protein processing,                                                                                                                                                                                                                                                                                                                                                                                                                                                                                                                                                                                                                                                                                                                                                                                                                                                                                                                                                                                                                                                                                                                                                                                                                                                                                                                                                                                                                                                                                                                                                                                                                                                                                                                                                                                              |
| ProxUt | UP   | GALK1        | galactokinase 1(GALK1)                                                | GO:0019402-galactitol metabolic process,GO:0061623-glycolytic process from galactose,                                                                                                                                                                                                                                                                                                                                                                                                                                                                                                                                                                                                                                                                                                                                                                                                                                                                                                                                                                                                                                                                                                                                                                                                                                                                                                                                                                                                                                                                                                                                                                                                                                                                                                                                       |
| ProxUt | UP   | DGAT1        | diacylglycerol O-acyltransferase 1(DGAT1)                             | GO:0019432-triglyceride biosynthetic process,GO:0019915-lipid storage,GO:0034379-very-low-density lipoprotein particle assembly,GO:0035336-long-chain fatty-acyl-CoA metabolic process,GO:0046339-diacylglycerol metabolic process,GO:0055089-fatty acid homeostasis,                                                                                                                                                                                                                                                                                                                                                                                                                                                                                                                                                                                                                                                                                                                                                                                                                                                                                                                                                                                                                                                                                                                                                                                                                                                                                                                                                                                                                                                                                                                                                       |
| ProxUt | UP   | PACSN3       | protein kinase C and casein kinase substrate in neurons 3(PACSN3)     | GO:0030100-regulation of endocytosis,GO:0097320-membrane tubulation,                                                                                                                                                                                                                                                                                                                                                                                                                                                                                                                                                                                                                                                                                                                                                                                                                                                                                                                                                                                                                                                                                                                                                                                                                                                                                                                                                                                                                                                                                                                                                                                                                                                                                                                                                        |
| ProxUt | UP   | SDR16C5      | short chain dehydrogenase/reductase family 16C, member 5(SDR16C5)     | GO:0042572-retinol metabolic process,GO:0042574-retinal metabolic process,GO:0043616-keratinocyte proliferation,                                                                                                                                                                                                                                                                                                                                                                                                                                                                                                                                                                                                                                                                                                                                                                                                                                                                                                                                                                                                                                                                                                                                                                                                                                                                                                                                                                                                                                                                                                                                                                                                                                                                                                            |
| ProxUt | UP   | JADE3        | jade family PHD finger 3(JADE3)                                       | GO:0043966-histone H3 acetylation,GO:0043981-histone H4-K5 acetylation,GO:0043982-histone H4-K8 acetylation,GO:0043983-histone H4-K12 acetylation,                                                                                                                                                                                                                                                                                                                                                                                                                                                                                                                                                                                                                                                                                                                                                                                                                                                                                                                                                                                                                                                                                                                                                                                                                                                                                                                                                                                                                                                                                                                                                                                                                                                                          |
| ProxUt | UP   | MTMR7        | myotubularin related protein 7(MTMR7)                                 | GO:0046855-inositol phosphate dephosphorylation,GO:0046856-phosphatidylinositol dephosphorylation,                                                                                                                                                                                                                                                                                                                                                                                                                                                                                                                                                                                                                                                                                                                                                                                                                                                                                                                                                                                                                                                                                                                                                                                                                                                                                                                                                                                                                                                                                                                                                                                                                                                                                                                          |
| ProxUt | UP   | CD207        | CD207 molecule, langerin(CD207)                                       | GO:0051607-defense response to virus,                                                                                                                                                                                                                                                                                                                                                                                                                                                                                                                                                                                                                                                                                                                                                                                                                                                                                                                                                                                                                                                                                                                                                                                                                                                                                                                                                                                                                                                                                                                                                                                                                                                                                                                                                                                       |
| ProxUt | DOWN | TCF7L2       | transcription factor 7 like 2(TCF7L2)                                 | GO:0000122-negative regulation of transcription from RNA polymerase II promoter,GO:0001568-blood vessel development,GO:0006357-regulation of transcription from RNA polymerase II promoter,GO:0007050-cell cycle arrest,GO:0008283-cell proliferation,GO:0010909-positive regulation of heparan sulfate proteoglycan biosynthetic process,GO:0032024-positive regulation of insulin secretion,GO:0032092-positive regulation of protein binding,GO:0032350-regulation of hormone metabolic process,GO:0042593-glucose homeostasis,GO:0043433-negative regulation of sequence-specific DNA binding transcription factor activity,GO:0043570-maintenance of DNA repeat elements,GO:0044334-canonical Wnt signaling pathway involved in positive regulation of epithelial to mesenchymal transition,GO:0045444-fat cell differentiation,GO:0045944-positive regulation of transcription from RNA polymerase II promoter,GO:0046827-positive regulation of protein export from nucleus,GO:0048625-myoblast fate commitment,GO:0048660-regulation of smooth muscle cell proliferation,GO:0051897-positive regulation of protein kinase B signaling,GO:0060070-canonical Wnt signaling pathway,GO:0090090-negative regulation of canonical Wnt signaling pathway,GO:2000675-negative regulation of type B pancreatic cell apoptotic process,GO:2001237-negative regulation of extrinsic apoptotic signaling pathway,                                                                                                                                                                                                                                                                                                                                                                                                              |
| ProxUt | DOWN | RARA         | retinoic acid receptor alpha(RARA)                                    | GO:0000122-negative regulation of transcription from RNA polymerase II promoter,GO:0001657-ureteric bud development,GO:0001843-neural tube closure,GO:0002068-glandular epithelial cell development,GO:0003148-outflow tract septum morphogenesis,GO:0003417-growth plate cartilage development,GO:0006351-transcription, DNA-templated,GO:0006468-protein phosphorylation,GO:0007281-germ cell development,GO:0007283-spermatogenesis,GO:0008284-positive regulation of cell proliferation,GO:0030853-negative regulation of granulocyte differentiation,GO:0031076-embryonic camera-type eye development,GO:0032689-negative regulation of interferon-gamma production,GO:0032720-negative regulation of tumor necrosis factor production,GO:0032736-positive regulation of interleukin-13 production,GO:0032753-positive regulation of interleukin-4 production,GO:0032754-positive regulation of interleukin-5 production,GO:0035264-multi-cellular organism growth,GO:0043066-negative regulation of apoptotic process,GO:0043277-apoptotic cell clearance,GO:0045630-positive regulation of T-helper 2 cell differentiation,GO:0045787-positive regulation of cell cycle,GO:0045944-positive regulation of transcription from RNA polymerase II promoter,GO:0045947-negative regulation of translational initiation,GO:0051099-positive regulation of binding,GO:0055012-ventricular cardiac muscle cell differentiation,GO:0060010-Sertoli cell fate commitment,GO:0060173-limb development,GO:0060324-face development,GO:0060534-trachea cartilage development,GO:0060591-chondroblast differentiation,GO:0061037-negative regulation of cartilage development,GO:0071222-cellular response to lipopolysaccharide,GO:0071300-cellular response to retinoic acid,GO:0071391-cellular response to estrogen stimulus, |
| ProxUt | DOWN | ZBTB1        | zinc finger and BTB domain containing 1(ZBTB1)                        | GO:0000122-negative regulation of transcription from RNA polymerase II promoter,GO:0002711-positive regulation of T cell mediated immunity,GO:0006338-chromatin remodeling,GO:0019985-translesion synthesis,GO:0030183-B cell differentiation,GO:0032825-positive regulation of natural killer cell differentiation,GO:0033077-T cell differentiation in thymus,GO:0034644-cellular response to UV,GO:0042789-mRNA transcription from RNA polymerase II promoter,GO:0048538-thymus development,GO:0051260-protein homooligomerization,GO:2000176-positive regulation of pro-T cell differentiation,                                                                                                                                                                                                                                                                                                                                                                                                                                                                                                                                                                                                                                                                                                                                                                                                                                                                                                                                                                                                                                                                                                                                                                                                                         |
| ProxUt | DOWN | TDG          | thymine-DNA glycosylase(TDG)                                          | GO:0000122-negative regulation of transcription from RNA polymerase II promoter,GO:0006285-base excision repair, AP site formation,GO:0006298-mismatch repair,GO:0009790-embryo development,GO:0032091-negative regulation of protein binding,GO:0035562-negative regulation of chromatin binding,GO:0040029-regulation of gene expression, epigenetic,GO:0080111-DNA demethylation,                                                                                                                                                                                                                                                                                                                                                                                                                                                                                                                                                                                                                                                                                                                                                                                                                                                                                                                                                                                                                                                                                                                                                                                                                                                                                                                                                                                                                                        |
| ProxUt | DOWN | PRDM1        | PR/SET domain 1(PRDM1)                                                | GO:0000122-negative regulation of transcription from RNA polymerase II promoter,GO:0048869-cellular developmental process,                                                                                                                                                                                                                                                                                                                                                                                                                                                                                                                                                                                                                                                                                                                                                                                                                                                                                                                                                                                                                                                                                                                                                                                                                                                                                                                                                                                                                                                                                                                                                                                                                                                                                                  |
| ProxUt | DOWN | P2RX7        | purinergic receptor P2X 7(P2RX7)                                      | GO:0000187-activation of MAPK activity,GO:0000902-cell morphogenesis,GO:0001845-phagolysosome assembly,GO:0001916-positive regulation of T cell mediated cytotoxicity,GO:0006468-protein phosphorylation,GO:0006509-membrane protein ectodomain proteolysis,GO:0006649-phospholipid transfer to membrane,GO:0006900-membrane budding,GO:0006954-inflammatory                                                                                                                                                                                                                                                                                                                                                                                                                                                                                                                                                                                                                                                                                                                                                                                                                                                                                                                                                                                                                                                                                                                                                                                                                                                                                                                                                                                                                                                                |

|        |      |              |                                                            |                                                                                                                                                                                                                                                                                                                                                                                                                                                                                                                                                                                                                                                                                                                                                                                                                                                                                                                                                                                                                                                                                                                                                                                                                                                                                                                                                                                                                                                                                                                                                                                                                                                                                                                                                                                                                                                                                                                                                                                                                                                                                                                                                                                                                                                                                                                                                                     |
|--------|------|--------------|------------------------------------------------------------|---------------------------------------------------------------------------------------------------------------------------------------------------------------------------------------------------------------------------------------------------------------------------------------------------------------------------------------------------------------------------------------------------------------------------------------------------------------------------------------------------------------------------------------------------------------------------------------------------------------------------------------------------------------------------------------------------------------------------------------------------------------------------------------------------------------------------------------------------------------------------------------------------------------------------------------------------------------------------------------------------------------------------------------------------------------------------------------------------------------------------------------------------------------------------------------------------------------------------------------------------------------------------------------------------------------------------------------------------------------------------------------------------------------------------------------------------------------------------------------------------------------------------------------------------------------------------------------------------------------------------------------------------------------------------------------------------------------------------------------------------------------------------------------------------------------------------------------------------------------------------------------------------------------------------------------------------------------------------------------------------------------------------------------------------------------------------------------------------------------------------------------------------------------------------------------------------------------------------------------------------------------------------------------------------------------------------------------------------------------------|
|        |      |              |                                                            | response,GO:0007005-mitochondrion organization,GO:0009612-response to mechanical stimulus,GO:0010043-response to zinc ion,GO:0010524-positive regulation of calcium ion transport into cytosol,GO:0010628-positive regulation of gene expression,GO:0014049-positive regulation of glutamate secretion,GO:0014054-positive regulation of gamma-aminobutyric acid secretion,GO:0016079-synaptic vesicle exocytosis,GO:0016485-protein processing,GO:0017121-phospholipid scrambling,GO:0019233-sensory perception of pain,GO:0019835-cytolysis,GO:0030501-positive regulation of bone mineralization,GO:0031668-cellular response to extracellular stimulus,GO:0032060-bleb assembly,GO:0032308-positive regulation of prostaglandin secretion,GO:0032496-response to lipopolysaccharide,GO:0032755-positive regulation of interleukin-6 production,GO:0032963-collagen metabolic process,GO:0033198-response to ATP,GO:0034405-response to fluid shear stress,GO:0034767-positive regulation of ion transmembrane transport,GO:0042098-T cell proliferation,GO:0042493-response to drug,GO:0043029-T cell homeostasis,GO:0043132-NAD transport,GO:0043409-negative regulation of MAPK cascade,GO:0044254-multicellular organismal protein catabolic process,GO:0045332-phospholipid translocation,GO:0045779-negative regulation of bone resorption,GO:0045794-negative regulation of cell volume,GO:0045821-positive regulation of glycolytic process,GO:0046513-ceramide biosynthetic process,GO:0046931-pore complex assembly,GO:0048705-skeletal system morphogenesis,GO:0048873-homeostasis of number of cells within a tissue,GO:0050717-positive regulation of interleukin-1 alpha secretion,GO:0050718-positive regulation of interleukin-1 beta secretion,GO:0050830-defense response to Gram-positive bacterium,GO:0051209-release of sequestered calcium ion into cytosol,GO:0051259-protein oligomerization,GO:0051592-response to calcium ion,GO:0051602-response to electrical stimulus,GO:0051899-membrane depolarization,GO:0051901-positive regulation of mitochondrial depolarization,GO:0070230-positive regulation of lymphocyte apoptotic process,GO:0071359-cellular response to dsRNA,GO:0072593-reactive oxygen species metabolic process,GO:0097191-extrinsic apoptotic signaling pathway,GO:1904172-positive regulation of bleb assembly, |
| ProxUt | DOWN | GOLGA5       | golgin A5(GOLGA5)                                          | GO:0000301-retrograde transport, vesicle recycling within Golgi,GO:0007030-Golgi organization,                                                                                                                                                                                                                                                                                                                                                                                                                                                                                                                                                                                                                                                                                                                                                                                                                                                                                                                                                                                                                                                                                                                                                                                                                                                                                                                                                                                                                                                                                                                                                                                                                                                                                                                                                                                                                                                                                                                                                                                                                                                                                                                                                                                                                                                                      |
| ProxUt | DOWN | ERCC6        | ERCC excision repair 6, chromatin remodeling factor(ERCC6) | GO:0000303-response to superoxide,GO:0006283-transcription-coupled nucleotide-excision repair,GO:0006284-base-excision repair,GO:0006290-pyrimidine dimer repair,GO:0006362-transcription elongation from RNA polymerase I promoter,GO:0007256-activation of JNK activity,GO:0007257-activation of JUN kinase activity,GO:0008630-intrinsic apoptotic signaling pathway in response to DNA damage,GO:0009636-response to toxic substance,GO:0010165-response to X-ray,GO:0010224-response to UV-B,GO:0010332-response to gamma radiation,GO:0032786-positive regulation of DNA-templated transcription, elongation,GO:0035264-multicellular organism growth,GO:0045494-photoreceptor cell maintenance,                                                                                                                                                                                                                                                                                                                                                                                                                                                                                                                                                                                                                                                                                                                                                                                                                                                                                                                                                                                                                                                                                                                                                                                                                                                                                                                                                                                                                                                                                                                                                                                                                                                              |
| ProxUt | DOWN | NOX4         | NADPH oxidase 4(NOX4)                                      | GO:0000902-cell morphogenesis,GO:0007569-cell aging,GO:0008285-negative regulation of cell proliferation,GO:0010467-gene expression,GO:0042554-superoxide anion generation,GO:0043406-positive regulation of MAP kinase activity,GO:0045453-bone resorption,GO:0050667-homocysteine metabolic process,GO:0051897-positive regulation of protein kinase B signaling,GO:0055007-cardiac muscle cell differentiation,GO:0070374-positive regulation of ERK1 and ERK2 cascade,GO:0071333-cellular response to glucose stimulus,GO:2000573-positive regulation of DNA biosynthetic process,                                                                                                                                                                                                                                                                                                                                                                                                                                                                                                                                                                                                                                                                                                                                                                                                                                                                                                                                                                                                                                                                                                                                                                                                                                                                                                                                                                                                                                                                                                                                                                                                                                                                                                                                                                              |
| ProxUt | DOWN | VCAN         | versican(VCAN)                                             | GO:0001501-skeletal system development,GO:0001649-osteoblast differentiation,GO:0007155-cell adhesion,GO:0007417-central nervous system development,                                                                                                                                                                                                                                                                                                                                                                                                                                                                                                                                                                                                                                                                                                                                                                                                                                                                                                                                                                                                                                                                                                                                                                                                                                                                                                                                                                                                                                                                                                                                                                                                                                                                                                                                                                                                                                                                                                                                                                                                                                                                                                                                                                                                                |
| ProxUt | DOWN | FBN1         | fibrillin 1(FBN1)                                          | GO:0001501-skeletal system development,GO:0006006-glucose metabolic process,GO:0007507-heart development,GO:0009653-anatomical structure morphogenesis,GO:0010737-protein kinase A signaling,GO:0034199-activation of protein kinase A activity,GO:0042593-glucose homeostasis,GO:0043010-camera-type eye development,GO:0048048-embryonic eye morphogenesis,GO:0048050-post-embryonic eye morphogenesis,GO:0090287-regulation of cellular response to growth factor stimulus,                                                                                                                                                                                                                                                                                                                                                                                                                                                                                                                                                                                                                                                                                                                                                                                                                                                                                                                                                                                                                                                                                                                                                                                                                                                                                                                                                                                                                                                                                                                                                                                                                                                                                                                                                                                                                                                                                      |
| ProxUt | DOWN | DMP1         | dentin matrix acidic phosphoprotein 1(DMP1)                | GO:0001503-ossification,GO:0010811-positive regulation of cell-substrate adhesion,GO:0030198-extracellular matrix organization,GO:0070173-regulation of enamel mineralization,                                                                                                                                                                                                                                                                                                                                                                                                                                                                                                                                                                                                                                                                                                                                                                                                                                                                                                                                                                                                                                                                                                                                                                                                                                                                                                                                                                                                                                                                                                                                                                                                                                                                                                                                                                                                                                                                                                                                                                                                                                                                                                                                                                                      |
| ProxUt | DOWN | ACKR3        | atypical chemokine receptor 3(ACKR3)                       | GO:0001525-angiogenesis,GO:0001570-vasculogenesis,GO:0002230-positive regulation of defense response to virus by host,GO:0006935-chemotaxis,GO:0031623-receptor internalization,GO:0070374-positive regulation of ERK1 and ERK2 cascade,GO:0098792-xenophagy,GO:1902230-negative regulation of intrinsic apoptotic signaling pathway in response to DNA damage,                                                                                                                                                                                                                                                                                                                                                                                                                                                                                                                                                                                                                                                                                                                                                                                                                                                                                                                                                                                                                                                                                                                                                                                                                                                                                                                                                                                                                                                                                                                                                                                                                                                                                                                                                                                                                                                                                                                                                                                                     |
| ProxUt | DOWN | EPAS1        | endothelial PAS domain protein 1(EPAS1)                    | GO:0001525-angiogenesis,GO:0001892-embryonic placenta development,GO:0001974-blood vessel remodeling,GO:0002027-regulation of heart rate,GO:0006351-transcription, DNA-templated,GO:0007005-mitochondrion organization,GO:0007601-visual perception,GO:0008218-erythrocyte differentiation,GO:0030324-lung development,GO:0042415-norepinephrine metabolic process,GO:0043129-surfactant homeostasis,GO:0043619-regulation of transcription from RNA polymerase II promoter in response to oxidative stress,GO:0045944-positive regulation of transcription from RNA polymerase II promoter,GO:0048469-cell maturation,GO:0048625-myoblast fate commitment,GO:0050572-iron ion homeostasis,GO:0071456-cellular response to hypoxia,                                                                                                                                                                                                                                                                                                                                                                                                                                                                                                                                                                                                                                                                                                                                                                                                                                                                                                                                                                                                                                                                                                                                                                                                                                                                                                                                                                                                                                                                                                                                                                                                                                 |
| ProxUt | DOWN | ENPEP        | glutamyl aminopeptidase(ENPEP)                             | GO:0001525-angiogenesis,GO:0002003-angiotensin maturation,GO:0003081-regulation of systemic arterial blood pressure by renin-angiotensin,GO:0006508-proteolysis,GO:0008217-regulation of blood pressure,GO:0008283-cell proliferation,GO:0016477-cell migration,GO:0032835-glomerulus development,GO:0043171-peptide catabolic process,                                                                                                                                                                                                                                                                                                                                                                                                                                                                                                                                                                                                                                                                                                                                                                                                                                                                                                                                                                                                                                                                                                                                                                                                                                                                                                                                                                                                                                                                                                                                                                                                                                                                                                                                                                                                                                                                                                                                                                                                                             |
| ProxUt | DOWN | MFGE8        | milk fat globule-EGF factor 8 protein(MFGE8)               | GO:0001525-angiogenesis,GO:0006910-phagocytosis, recognition,GO:0006911-phagocytosis, engulfment,GO:0007155-cell adhesion,GO:0007338-single fertilization,GO:2000427-positive regulation of apoptotic cell clearance,                                                                                                                                                                                                                                                                                                                                                                                                                                                                                                                                                                                                                                                                                                                                                                                                                                                                                                                                                                                                                                                                                                                                                                                                                                                                                                                                                                                                                                                                                                                                                                                                                                                                                                                                                                                                                                                                                                                                                                                                                                                                                                                                               |
| ProxUt | DOWN | SRPX2        | sushi repeat containing protein, X-linked 2(SRPX2)         | GO:0001525-angiogenesis,GO:0016337-single organismal cell-cell adhesion,GO:0042325-regulation of phosphorylation,GO:0048870-cell motility,GO:0051965-positive regulation of synapse assembly,GO:0071625-vocalization behavior,GO:0090050-positive regulation of cell migration involved in sprouting angiogenesis,                                                                                                                                                                                                                                                                                                                                                                                                                                                                                                                                                                                                                                                                                                                                                                                                                                                                                                                                                                                                                                                                                                                                                                                                                                                                                                                                                                                                                                                                                                                                                                                                                                                                                                                                                                                                                                                                                                                                                                                                                                                  |
| ProxUt | DOWN | LOC100525121 | neuron navigator 1(LOC100525121)                           | GO:0001578-microtubule bundle formation,GO:0001764-neuron migration,                                                                                                                                                                                                                                                                                                                                                                                                                                                                                                                                                                                                                                                                                                                                                                                                                                                                                                                                                                                                                                                                                                                                                                                                                                                                                                                                                                                                                                                                                                                                                                                                                                                                                                                                                                                                                                                                                                                                                                                                                                                                                                                                                                                                                                                                                                |
| ProxUt | DOWN | GJA1         | gap junction protein alpha 1(GJA1)                         | GO:0001649-osteoblast differentiation,GO:0001701-in utero embryonic development,GO:0001764-neuron migration,GO:0001947-heart looping,GO:0002070-epithelial cell maturation,GO:0002088-lens development in camera-type eye,GO:0002931-response to ischemia,GO:0003294-atrial ventricular junction remodeling,GO:0007154-cell communication,GO:0007267-cell-cell signaling,GO:0007507-heart development,GO:0007512-adult heart development,GO:0009611-response to wounding,GO:0010628-positive regulation of gene expression,GO:0010629-negative regulation of gene expression,GO:0010643-cell communication by chemical coupling,GO:0030308-negative regulation of cell growth,GO:0030500-regulation of bone mineralization,GO:0036120-cellular response to platelet-derived growth factor stimulus,GO:0042733-embryonic digit morphogenesis,GO:0043123-positive regulation of I-kappaB kinase/NF-kappaB signaling,GO:0043403-skeletal muscle tissue regeneration,GO:0045216-cell-cell junction organization,GO:0045669-positive regulation of osteoblast differentiation,GO:0045844-positive regulation of striated muscle tissue development,GO:0046850-regulation of bone remodeling,GO:0048514-blood vessel morphogenesis,GO:0055085-transmembrane transport,GO:0060156-milk ejection,GO:0060307-regulation of ventricular cardiac muscle cell membrane repolarization,GO:0060371-regulation of atrial cardiac muscle cell membrane depolarization,GO:0060373-regulation of ventricular cardiac muscle cell membrane depolarization,GO:0061337-cardiac conduction,GO:0071673-positive regulation of smooth muscle cell chemotaxis,                                                                                                                                                                                                                                                                                                                                                                                                                                                                                                                                                                                                                                                                                                                               |
| ProxUt | DOWN | MRC2         | mannose receptor C type 2(MRC2)                            | GO:0001649-osteoblast differentiation,GO:0030574-collagen catabolic process,                                                                                                                                                                                                                                                                                                                                                                                                                                                                                                                                                                                                                                                                                                                                                                                                                                                                                                                                                                                                                                                                                                                                                                                                                                                                                                                                                                                                                                                                                                                                                                                                                                                                                                                                                                                                                                                                                                                                                                                                                                                                                                                                                                                                                                                                                        |
| ProxUt | DOWN | PLAU         | plasminogen activator, urokinase(PLAU)                     | GO:0001666-response to hypoxia,GO:0006508-proteolysis,GO:0010469-regulation of receptor activity,GO:0014909-smooth muscle cell migration,GO:0014910-regulation of smooth muscle cell migration,GO:0030335-positive regulation of cell migration,GO:0033628-regulation of cell adhesion mediated by integrin,GO:0042127-regulation of cell proliferation,GO:0042730-fibrinolysis,GO:2000097-regulation of smooth muscle cell-matrix adhesion,                                                                                                                                                                                                                                                                                                                                                                                                                                                                                                                                                                                                                                                                                                                                                                                                                                                                                                                                                                                                                                                                                                                                                                                                                                                                                                                                                                                                                                                                                                                                                                                                                                                                                                                                                                                                                                                                                                                        |
| ProxUt | DOWN | PLOD2        | procollagen-lysine,2-oxoglutarate 5-dioxygenase 2(PLOD2)   | GO:0001666-response to hypoxia,GO:0098779-mitophagy in response to mitochondrial depolarization,                                                                                                                                                                                                                                                                                                                                                                                                                                                                                                                                                                                                                                                                                                                                                                                                                                                                                                                                                                                                                                                                                                                                                                                                                                                                                                                                                                                                                                                                                                                                                                                                                                                                                                                                                                                                                                                                                                                                                                                                                                                                                                                                                                                                                                                                    |
| ProxUt | DOWN | MAN2A1       | mannosidase alpha class 2A member 1(MAN2A1)                | GO:0001701-in utero embryonic development,GO:0001889-liver development,GO:0006013-mannose metabolic process,GO:0006491-N-glycan processing,GO:0006517-protein deglycosylation,GO:0007005-mitochondrion organization,GO:0007033-vacuole organization,GO:0007585-respiratory gaseous exchange,GO:0048286-lung alveolus development,GO:0050769-positive regulation of neurogenesis,GO:0060042-retina morphogenesis in camera-type eye,                                                                                                                                                                                                                                                                                                                                                                                                                                                                                                                                                                                                                                                                                                                                                                                                                                                                                                                                                                                                                                                                                                                                                                                                                                                                                                                                                                                                                                                                                                                                                                                                                                                                                                                                                                                                                                                                                                                                 |
| ProxUt | DOWN | LOC100739844 | semaphorin-3A-like(LOC100739844)                           | GO:0001755-neural crest cell migration,GO:0021772-olfactory bulb development,GO:0048843-negative regulation of axon extension involved in axon guidance,GO:0050919-negative chemotaxis,GO:0071526-semaphorin-plexin signaling pathway,GO:2001224-positive regulation of neuron migration,                                                                                                                                                                                                                                                                                                                                                                                                                                                                                                                                                                                                                                                                                                                                                                                                                                                                                                                                                                                                                                                                                                                                                                                                                                                                                                                                                                                                                                                                                                                                                                                                                                                                                                                                                                                                                                                                                                                                                                                                                                                                           |
| ProxUt | DOWN | ELF4         | E74 like ETS transcription factor 4(ELF4)                  | GO:0001787-natural killer cell proliferation,GO:0001866-NK T cell proliferation,GO:0006357-regulation of transcription from RNA polymerase II promoter,GO:0030154-cell differentiation,GO:0045087-innate immune response,GO:0045944-positive regulation of transcription from RNA polymerase II promoter,                                                                                                                                                                                                                                                                                                                                                                                                                                                                                                                                                                                                                                                                                                                                                                                                                                                                                                                                                                                                                                                                                                                                                                                                                                                                                                                                                                                                                                                                                                                                                                                                                                                                                                                                                                                                                                                                                                                                                                                                                                                           |
| ProxUt | DOWN | IRAK4        | interleukin 1 receptor associated kinase 4(IRAK4)          | GO:0001816-cytokine production,GO:0002446-neutrophil mediated immunity,GO:0019221-cytokine-mediated signaling pathway,GO:0035556-intracellular signal transduction,GO:0043123-positive regulation of I-kappaB kinase/NF-kappaB signaling,GO:1990266-neutrophil migration,                                                                                                                                                                                                                                                                                                                                                                                                                                                                                                                                                                                                                                                                                                                                                                                                                                                                                                                                                                                                                                                                                                                                                                                                                                                                                                                                                                                                                                                                                                                                                                                                                                                                                                                                                                                                                                                                                                                                                                                                                                                                                           |

|        |      |         |                                                                       |                                                                                                                                                                                                                                                                                                                                                                                                                                                                                                                                                                                                                                                                                                                                                                                                                                                                                                                                                                                                                                                                                                                                                                        |
|--------|------|---------|-----------------------------------------------------------------------|------------------------------------------------------------------------------------------------------------------------------------------------------------------------------------------------------------------------------------------------------------------------------------------------------------------------------------------------------------------------------------------------------------------------------------------------------------------------------------------------------------------------------------------------------------------------------------------------------------------------------------------------------------------------------------------------------------------------------------------------------------------------------------------------------------------------------------------------------------------------------------------------------------------------------------------------------------------------------------------------------------------------------------------------------------------------------------------------------------------------------------------------------------------------|
| ProxUt | DOWN | AGTR1   | angiotensin II receptor type 1(AGTR1)                                 | GO:001822-kidney development,GO:0007266-Rho protein signal transduction,GO:0010873-positive regulation of cholesterol esterification,GO:0019229-regulation of vasoconstriction,GO:0019722-calcium-mediated signaling,GO:0032270-positive regulation of cellular protein metabolic process,GO:0032430-positive regulation of phospholipase A2 activity,GO:0051482-positive regulation of cytosolic calcium ion concentration involved in phospholipase C-activating G-protein coupled signaling pathway,GO:0060326-cell chemotaxis,GO:0086097-phospholipase C-activating angiotensin-activated signaling pathway,                                                                                                                                                                                                                                                                                                                                                                                                                                                                                                                                                       |
| ProxUt | DOWN | SDC4    | syndecan 4(SDC4)                                                      | GO:0001843-neural tube closure,GO:0010762-regulation of fibroblast migration,GO:0016477-cell migration,GO:0042060-wound healing,GO:0060122-inner ear receptor stereocilium organization,GO:1903543-positive regulation of exosomal secretion,GO:1903553-positive regulation of extracellular exosome assembly,                                                                                                                                                                                                                                                                                                                                                                                                                                                                                                                                                                                                                                                                                                                                                                                                                                                         |
| ProxUt | DOWN | ECE1    | endothelin converting enzyme 1(ECE1)                                  | GO:0001921-positive regulation of receptor recycling,GO:0007507-heart development,GO:0010814-substance P catabolic process,GO:0010815-bradykinin catabolic process,GO:0010816-calcitonin catabolic process,GO:0016485-protein processing,GO:0034959-endothelin maturation,GO:0042733-embryonic digit morphogenesis,GO:0043583-ear development,GO:0060037-pharyngeal system development,                                                                                                                                                                                                                                                                                                                                                                                                                                                                                                                                                                                                                                                                                                                                                                                |
| ProxUt | DOWN | STAT2   | signal transducer and activator of transcription 2(STAT2)             | GO:0001932-regulation of protein phosphorylation,GO:0002230-positive regulation of defense response to virus by host,GO:0006351-transcription, DNA-templated,GO:0006355-regulation of transcription, DNA-templated,GO:0051607-defense response to virus,GO:0060337-type I interferon signaling pathway,GO:0090140-regulation of mitochondrial fission,GO:0098779-mitophagy in response to mitochondrial depolarization,GO:0098792-xenophagy,                                                                                                                                                                                                                                                                                                                                                                                                                                                                                                                                                                                                                                                                                                                           |
| ProxUt | DOWN | PLAUR   | plasminogen activator, urokinase receptor(PLAUR)                      | GO:0001934-positive regulation of protein phosphorylation,GO:0030162-regulation of proteolysis,GO:0038195-urokinase plasminogen activator signaling pathway,GO:0043388-positive regulation of DNA binding,GO:0045742-positive regulation of epidermal growth factor receptor signaling pathway,GO:0090200-positive regulation of release of cytochrome c from mitochondria,GO:2001243-negative regulation of intrinsic apoptotic signaling pathway,GO:2001268-negative regulation of cysteine-type endopeptidase activity involved in apoptotic signaling pathway,                                                                                                                                                                                                                                                                                                                                                                                                                                                                                                                                                                                                     |
| ProxUt | DOWN | KDR     | kinase insert domain receptor(KDR)                                    | GO:0001938-positive regulation of endothelial cell proliferation,GO:0008360-regulation of cell shape,GO:0014068-positive regulation of phosphatidylinositol 3-kinase signaling,GO:0016239-positive regulation of macroautophagy,GO:0035584-calcium-mediated signaling using intracellular calcium source,GO:0038033-positive regulation of endothelial cell chemotaxis by VEGF-activated vascular endothelial growth factor receptor signaling pathway,GO:0045766-positive regulation of angiogenesis,GO:0046777-protein autophosphorylation,GO:0048010-vascular endothelial growth factor receptor signaling pathway,GO:0050927-positive regulation of positive chemotaxis,GO:0051770-positive regulation of nitric-oxide synthase biosynthetic process,GO:0051894-positive regulation of focal adhesion assembly,GO:0051901-positive regulation of mitochondrial depolarization,GO:0070374-positive regulation of ERK1 and ERK2 cascade,GO:0090141-positive regulation of mitochondrial fission,GO:2000352-negative regulation of endothelial cell apoptotic process,                                                                                                |
| ProxUt | DOWN | CRYGS   | crystallin gamma S(CRYGS)                                             | GO:0002009-morphogenesis of an epithelium,GO:0002088-lens development in camera-type eye,                                                                                                                                                                                                                                                                                                                                                                                                                                                                                                                                                                                                                                                                                                                                                                                                                                                                                                                                                                                                                                                                              |
| ProxUt | DOWN | WNT2    | Wnt family member 2(WNT2)                                             | GO:0002053-positive regulation of mesenchymal cell proliferation,GO:0016055-Wnt signaling pathway,GO:0030182-neuron differentiation,GO:0033278-cell proliferation in midbrain,GO:0045165-cell fate commitment,GO:0045944-positive regulation of transcription from RNA polymerase II promoter,GO:0048146-positive regulation of fibroblast proliferation,GO:0050769-positive regulation of neurogenesis,GO:0051091-positive regulation of sequence-specific DNA binding transcription factor activity,GO:0055009-atrial cardiac muscle tissue morphogenesis,GO:0060045-positive regulation of cardiac muscle cell proliferation,GO:0060070-canonical Wnt signaling pathway,GO:0060317-cardiac epithelial to mesenchymal transition,GO:0060492-lung induction,GO:0060501-positive regulation of epithelial cell proliferation involved in lung morphogenesis,GO:0060716-labyrinthine layer blood vessel development,GO:0061180-mammary gland epithelium development,GO:0071560-cellular response to transforming growth factor beta stimulus,GO:0090263-positive regulation of canonical Wnt signaling pathway,GO:1904948-midbrain dopaminergic neuron differentiation, |
| ProxUt | DOWN | CREB3L2 | cAMP responsive element binding protein 3 like 2(CREB3L2)             | GO:0002062-chondrocyte differentiation,GO:0068888-ER to Golgi vesicle-mediated transport,GO:0030968-endoplasmic reticulum unfolded protein response,                                                                                                                                                                                                                                                                                                                                                                                                                                                                                                                                                                                                                                                                                                                                                                                                                                                                                                                                                                                                                   |
| ProxUt | DOWN | B4GALT1 | beta-1,4-galactosyltransferase 1(B4GALT1)                             | GO:0002064-epithelial cell development,GO:0002526-acute inflammatory response,GO:0005989-lactose biosynthetic process,GO:0006012-galactose metabolic process,GO:0006487-protein N-linked glycosylation,GO:0007155-cell adhesion,GO:0007339-binding of sperm to zona pellucida,GO:0007341-penetration of zona pellucida,GO:0008285-negative regulation of cell proliferation,GO:0030198-extracellular matrix organization,GO:0030879-mammary gland development,GO:0045136-development of secondary sexual characteristics,GO:0048754-branching morphogenesis of an epithelial tube,GO:0050900-leukocyte migration,GO:0051270-regulation of cellular component movement,GO:0060046-regulation of acrosome reaction,GO:0060054-positive regulation of epithelial cell proliferation involved in wound healing,GO:0060055-angiogenesis involved in wound healing,GO:0060058-positive regulation of apoptotic process involved in mammary gland involution,                                                                                                                                                                                                                 |
| ProxUt | DOWN | FGFBP1  | fibroblast growth factor binding protein 1(FGFBP1)                    | GO:0002230-positive regulation of defense response to virus by host,GO:0008284-positive regulation of cell proliferation,GO:0045743-positive regulation of fibroblast growth factor receptor signaling pathway,GO:0098779-mitophagy in response to mitochondrial depolarization,GO:0098792-xenophagy,                                                                                                                                                                                                                                                                                                                                                                                                                                                                                                                                                                                                                                                                                                                                                                                                                                                                  |
| ProxUt | DOWN | TMEM39A | transmembrane protein 39A(TMEM39A)                                    | GO:0002230-positive regulation of defense response to virus by host,GO:0098779-mitophagy in response to mitochondrial depolarization,GO:0098792-xenophagy,                                                                                                                                                                                                                                                                                                                                                                                                                                                                                                                                                                                                                                                                                                                                                                                                                                                                                                                                                                                                             |
| ProxUt | DOWN | GCNT3   | glucosaminyl (N-acetyl) transferase 3, mucin type(GCNT3)              | GO:0002426-immunoglobulin production in mucosal tissue,GO:0048729-tissue morphogenesis,GO:0050892-intestinal absorption,GO:0060993-kidney morphogenesis,                                                                                                                                                                                                                                                                                                                                                                                                                                                                                                                                                                                                                                                                                                                                                                                                                                                                                                                                                                                                               |
| ProxUt | DOWN | ABCB1   | ATP-binding cassette, sub-family B (MDR/TAP), member 1(ABCB1)         | GO:0002481-antigen processing and presentation of exogenous protein antigen via MHC class Ib, TAP-dependent,GO:0002485-antigen processing and presentation of endogenous peptide antigen via MHC class I via ER pathway, TAP-dependent,GO:0002489-antigen processing and presentation of endogenous peptide antigen via MHC class Ib via ER pathway, TAP-dependent,GO:0002591-positive regulation of antigen processing and presentation of peptide antigen via MHC class I,GO:0055085-transmembrane transport,                                                                                                                                                                                                                                                                                                                                                                                                                                                                                                                                                                                                                                                        |
| ProxUt | DOWN | VNN1    | vanin 1(VNN1)                                                         | GO:0002526-acute inflammatory response,GO:0002544-chronic inflammatory response,GO:0006768-biotin metabolic process,GO:0006807-nitrogen compound metabolic process,GO:0007417-central nervous system development,GO:0015939-pantothenate metabolic process,GO:0016337-single organismal cell-cell adhesion,GO:0033089-positive regulation of T cell differentiation in thymus,GO:0045087-innate immune response,GO:1902176-negative regulation of oxidative stress-induced intrinsic apoptotic signaling pathway,                                                                                                                                                                                                                                                                                                                                                                                                                                                                                                                                                                                                                                                      |
| ProxUt | DOWN | GLB1L   | galactosidase beta 1 like(GLB1L)                                      | GO:0059755-carbohydrate metabolic process,                                                                                                                                                                                                                                                                                                                                                                                                                                                                                                                                                                                                                                                                                                                                                                                                                                                                                                                                                                                                                                                                                                                             |
| ProxUt | DOWN | GPD2    | glycerol-3-phosphate dehydrogenase 2(GPD2)                            | GO:0006072-glycerol-3-phosphate metabolic process,GO:0006094-gluconeogenesis,GO:0035264-multicellular organism growth,GO:0043010-camera-type eye development,                                                                                                                                                                                                                                                                                                                                                                                                                                                                                                                                                                                                                                                                                                                                                                                                                                                                                                                                                                                                          |
| ProxUt | DOWN | DCTD    | dCMP deaminase(DCTD)                                                  | GO:0006220-pyrimidine nucleotide metabolic process,                                                                                                                                                                                                                                                                                                                                                                                                                                                                                                                                                                                                                                                                                                                                                                                                                                                                                                                                                                                                                                                                                                                    |
| ProxUt | DOWN | FAM111A | family with sequence similarity 111 member A(FAM111A)                 | GO:0006260-DNA replication,GO:0045071-negative regulation of viral genome replication,                                                                                                                                                                                                                                                                                                                                                                                                                                                                                                                                                                                                                                                                                                                                                                                                                                                                                                                                                                                                                                                                                 |
| ProxUt | DOWN | DCLRE1A | DNA cross-link repair 1A(DCLRE1A)                                     | GO:0006303-double-strand break repair via nonhomologous end joining,GO:0031848-protection from non-homologous end joining at telomere,GO:0036297-interstrand cross-link repair,                                                                                                                                                                                                                                                                                                                                                                                                                                                                                                                                                                                                                                                                                                                                                                                                                                                                                                                                                                                        |
| ProxUt | DOWN | HOXA10  | homeobox A10(HOXA10)                                                  | GO:0006355-regulation of transcription, DNA-templated,                                                                                                                                                                                                                                                                                                                                                                                                                                                                                                                                                                                                                                                                                                                                                                                                                                                                                                                                                                                                                                                                                                                 |
| ProxUt | DOWN | HOXA10  | homeobox A10(HOXA10)                                                  | GO:0006355-regulation of transcription, DNA-templated,                                                                                                                                                                                                                                                                                                                                                                                                                                                                                                                                                                                                                                                                                                                                                                                                                                                                                                                                                                                                                                                                                                                 |
| ProxUt | DOWN | TCEAL8  | transcription elongation factor A like 8(TCEAL8)                      | GO:0006357-regulation of transcription from RNA polymerase II promoter,                                                                                                                                                                                                                                                                                                                                                                                                                                                                                                                                                                                                                                                                                                                                                                                                                                                                                                                                                                                                                                                                                                |
| ProxUt | DOWN | MAGED1  | MAGE family member D1(MAGED1)                                         | GO:0006357-regulation of transcription from RNA polymerase II promoter,GO:0032922-circadian regulation of gene expression,GO:0042752-regulation of circadian rhythm,GO:0042981-regulation of apoptotic process,GO:0043406-positive regulation of MAP kinase activity,GO:0045892-negative regulation of transcription, DNA-templated,GO:0045893-positive regulation of transcription, DNA-templated,GO:0050680-negative regulation of epithelial cell proliferation,GO:0090190-positive regulation of branching involved in ureteric bud morphogenesis,GO:2001235-positive regulation of apoptotic signaling pathway,                                                                                                                                                                                                                                                                                                                                                                                                                                                                                                                                                   |
| ProxUt | DOWN | ZNF516  | zinc finger protein 516(ZNF516)                                       | GO:0006366-transcription from RNA polymerase II promoter,GO:0007165-signal transduction,GO:0007275-multicellular organism development,GO:0009409-response to cold,GO:0045893-positive regulation of transcription, DNA-templated,GO:0050873-brown fat cell differentiation,GO:0060612-adipose tissue development,                                                                                                                                                                                                                                                                                                                                                                                                                                                                                                                                                                                                                                                                                                                                                                                                                                                      |
| ProxUt | DOWN | ERP44   | endoplasmic reticulum protein 44(ERP44)                               | GO:0006457-protein folding,GO:0006986-response to unfolded protein,GO:0009100-glycoprotein metabolic process,GO:0034976-response to endoplasmic reticulum stress,GO:0045454-cell redox homeostasis,                                                                                                                                                                                                                                                                                                                                                                                                                                                                                                                                                                                                                                                                                                                                                                                                                                                                                                                                                                    |
| ProxUt | DOWN | GMNN    | geminin, DNA replication inhibitor(GMNN)                              | GO:0006461-protein complex assembly,GO:0008156-negative regulation of DNA replication,GO:0009887-organ morphogenesis,GO:0045786-negative regulation of cell cycle,GO:0045892-negative regulation of transcription, DNA-templated,                                                                                                                                                                                                                                                                                                                                                                                                                                                                                                                                                                                                                                                                                                                                                                                                                                                                                                                                      |
| ProxUt | DOWN | NCEH1   | neutral cholesterol ester hydrolase 1(NCEH1)                          | GO:0006470-protein dephosphorylation,GO:0006805-xenobiotic metabolic process,GO:0009056-catabolic process,GO:0060395-SMAD protein signal transduction,                                                                                                                                                                                                                                                                                                                                                                                                                                                                                                                                                                                                                                                                                                                                                                                                                                                                                                                                                                                                                 |
| ProxUt | DOWN | B3GNT2  | UDP-GlcNAc:betaGal beta-1,3-N-acetylglucosaminyltransferase 2(B3GNT2) | GO:0006486-protein glycosylation,                                                                                                                                                                                                                                                                                                                                                                                                                                                                                                                                                                                                                                                                                                                                                                                                                                                                                                                                                                                                                                                                                                                                      |

|        |      |              |                                                                |                                                                                                                                                                                                                                                                                                                                                                                                                                                                                                                                                                                                                                                                                                                                                                                                                                                                                                                                                                                                                                                                                          |
|--------|------|--------------|----------------------------------------------------------------|------------------------------------------------------------------------------------------------------------------------------------------------------------------------------------------------------------------------------------------------------------------------------------------------------------------------------------------------------------------------------------------------------------------------------------------------------------------------------------------------------------------------------------------------------------------------------------------------------------------------------------------------------------------------------------------------------------------------------------------------------------------------------------------------------------------------------------------------------------------------------------------------------------------------------------------------------------------------------------------------------------------------------------------------------------------------------------------|
| ProxUt | DOWN | B3GALT2      | beta-1,3-galactosyltransferase 2(B3GALT2)                      | GO:0006486-protein glycosylation,GO:0009312-oligosaccharide biosynthetic process,                                                                                                                                                                                                                                                                                                                                                                                                                                                                                                                                                                                                                                                                                                                                                                                                                                                                                                                                                                                                        |
| ProxUt | DOWN | MAN1A1       | mannosidase alpha class 1A member 1(MAN1A1)                    | GO:0006491-N-glycan processing,GO:0008152-metabolic process,                                                                                                                                                                                                                                                                                                                                                                                                                                                                                                                                                                                                                                                                                                                                                                                                                                                                                                                                                                                                                             |
| ProxUt | DOWN | CPXM1        | carboxypeptidase X, M14 family member 1(CPXM1)                 | GO:0006508-proteolysis,                                                                                                                                                                                                                                                                                                                                                                                                                                                                                                                                                                                                                                                                                                                                                                                                                                                                                                                                                                                                                                                                  |
| ProxUt | DOWN | MMP1         | matrix metalloproteinase 1(MMP1)                               | GO:0006508-proteolysis,GO:0030574-collagen catabolic process,GO:0032461-positive regulation of protein oligomerization,                                                                                                                                                                                                                                                                                                                                                                                                                                                                                                                                                                                                                                                                                                                                                                                                                                                                                                                                                                  |
| ProxUt | DOWN | USP15        | ubiquitin specific peptidase 15(USP15)                         | GO:0006511-ubiquitin-dependent protein catabolic process,GO:0016579-protein deubiquitination,                                                                                                                                                                                                                                                                                                                                                                                                                                                                                                                                                                                                                                                                                                                                                                                                                                                                                                                                                                                            |
| ProxUt | DOWN | SRP54        | signal recognition particle 54(SRP54)                          | GO:0006614-SRP-dependent cotranslational protein targeting to membrane,GO:0042493-response to drug,                                                                                                                                                                                                                                                                                                                                                                                                                                                                                                                                                                                                                                                                                                                                                                                                                                                                                                                                                                                      |
| ProxUt | DOWN | KDEL3        | KDEL endoplasmic reticulum protein retention receptor 3(KDEL3) | GO:0006621-protein retention in ER lumen,GO:0015031-protein transport,                                                                                                                                                                                                                                                                                                                                                                                                                                                                                                                                                                                                                                                                                                                                                                                                                                                                                                                                                                                                                   |
| ProxUt | DOWN | SEC23A       | Sec23 homolog A, coat complex II component(SEC23A)             | GO:0006886-intracellular protein transport,GO:0006888-ER to Golgi vesicle-mediated transport,                                                                                                                                                                                                                                                                                                                                                                                                                                                                                                                                                                                                                                                                                                                                                                                                                                                                                                                                                                                            |
| ProxUt | DOWN | TBC1D15      | TBC1 domain family member 15(TBC1D15)                          | GO:0006886-intracellular protein transport,GO:0031338-regulation of vesicle fusion,GO:0090630-activation of GTPase activity,                                                                                                                                                                                                                                                                                                                                                                                                                                                                                                                                                                                                                                                                                                                                                                                                                                                                                                                                                             |
| ProxUt | DOWN | EXOC5        | exocyst complex component 5(EXOC5)                             | GO:0006887-exocytosis,GO:0042384-cilium assembly,GO:0048278-vesicle docking,                                                                                                                                                                                                                                                                                                                                                                                                                                                                                                                                                                                                                                                                                                                                                                                                                                                                                                                                                                                                             |
| ProxUt | DOWN | LMAN2        | lectin, mannose binding 2(LMAN2)                               | GO:0006888-ER to Golgi vesicle-mediated transport,GO:0006890-retrograde vesicle-mediated transport, Golgi to ER,GO:0007029-endoplasmic reticulum organization,GO:0007030-Golgi organization,GO:0050766-positive regulation of phagocytosis,                                                                                                                                                                                                                                                                                                                                                                                                                                                                                                                                                                                                                                                                                                                                                                                                                                              |
| ProxUt | DOWN | NSF          | N-ethylmaleimide sensitive factor, vesicle fusing ATPase(NSF)  | GO:0006891-intra-Golgi vesicle-mediated transport,GO:0043001-Golgi to plasma membrane protein transport,GO:0048211-Golgi vesicle docking,                                                                                                                                                                                                                                                                                                                                                                                                                                                                                                                                                                                                                                                                                                                                                                                                                                                                                                                                                |
| ProxUt | DOWN | CHIC2        | cysteine rich hydrophobic domain 2(CHIC2)                      | GO:0006893-Golgi to plasma membrane transport,                                                                                                                                                                                                                                                                                                                                                                                                                                                                                                                                                                                                                                                                                                                                                                                                                                                                                                                                                                                                                                           |
| ProxUt | DOWN | RAB8B        | RAB8B, member RAS oncogene family(RAB8B)                       | GO:0006904-vesicle docking involved in exocytosis,GO:0007264-small GTPase mediated signal transduction,GO:0009306-protein secretion,GO:0019882-antigen processing and presentation,GO:0045046-protein import into peroxisome membrane,                                                                                                                                                                                                                                                                                                                                                                                                                                                                                                                                                                                                                                                                                                                                                                                                                                                   |
| ProxUt | DOWN | TMEM74       | transmembrane protein 74(TMEM74)                               | GO:0006914-autophagy,                                                                                                                                                                                                                                                                                                                                                                                                                                                                                                                                                                                                                                                                                                                                                                                                                                                                                                                                                                                                                                                                    |
| ProxUt | DOWN | GPX8         | glutathione peroxidase 8 (putative)(GPX8)                      | GO:0006979-response to oxidative stress,                                                                                                                                                                                                                                                                                                                                                                                                                                                                                                                                                                                                                                                                                                                                                                                                                                                                                                                                                                                                                                                 |
| ProxUt | DOWN | CLDN11       | claudin 11(CLDN11)                                             | GO:0007155-cell adhesion,GO:0007283-spermatogenesis,GO:0008366-axon ensheathment,                                                                                                                                                                                                                                                                                                                                                                                                                                                                                                                                                                                                                                                                                                                                                                                                                                                                                                                                                                                                        |
| ProxUt | DOWN | SELL         | selectin L(SELL)                                               | GO:0007155-cell adhesion,GO:0033198-response to ATP,                                                                                                                                                                                                                                                                                                                                                                                                                                                                                                                                                                                                                                                                                                                                                                                                                                                                                                                                                                                                                                     |
| ProxUt | DOWN | LOC100520265 | protocadherin-9(LOC100520265)                                  | GO:0007156-homophilic cell adhesion via plasma membrane adhesion molecules,                                                                                                                                                                                                                                                                                                                                                                                                                                                                                                                                                                                                                                                                                                                                                                                                                                                                                                                                                                                                              |
| ProxUt | DOWN | CDH11        | cadherin 11(CDH11)                                             | GO:0007156-homophilic cell adhesion via plasma membrane adhesion molecules,GO:0021957-corticospinal tract morphogenesis,                                                                                                                                                                                                                                                                                                                                                                                                                                                                                                                                                                                                                                                                                                                                                                                                                                                                                                                                                                 |
| ProxUt | DOWN | COL3A1       | collagen type III alpha 1 chain(COL3A1)                        | GO:0007160-cell-matrix adhesion,GO:0007179-transforming growth factor beta receptor signaling pathway,GO:0007229-integrin-mediated signaling pathway,GO:0007507-heart development,GO:0009314-response to radiation,GO:0018149-peptide cross-linking,GO:0021987-cerebral cortex development,GO:0030199-collagen fibril organization,GO:0034097-response to cytokine,GO:0035025-positive regulation of Rho protein signal transduction,GO:0042060-wound healing,GO:0043206-extraacellular fibril organization,GO:0043588-skin development,GO:0048565-digestive tract development,GO:0050777-negative regulation of immune response,GO:0060414-aorta smooth muscle tissue morphogenesis,GO:0071230-cellular response to amino acid stimulus,GO:2001223-negative regulation of neuron migration,                                                                                                                                                                                                                                                                                             |
| ProxUt | DOWN | PDE7B        | phosphodiesterase 7B(PDE7B)                                    | GO:0007165-signal transduction,                                                                                                                                                                                                                                                                                                                                                                                                                                                                                                                                                                                                                                                                                                                                                                                                                                                                                                                                                                                                                                                          |
| ProxUt | DOWN | SPARC        | secreted protein, acidic, cysteine-rich (osteonectin)(SPARC)   | GO:0007165-signal transduction,GO:0048856-anatomical structure development,                                                                                                                                                                                                                                                                                                                                                                                                                                                                                                                                                                                                                                                                                                                                                                                                                                                                                                                                                                                                              |
| ProxUt | DOWN | GNAI1        | G protein subunit alpha i1(GNAI1)                              | GO:0007188-adenylate cyclase-modulating G-protein coupled receptor signaling pathway,GO:0051301-cell division,                                                                                                                                                                                                                                                                                                                                                                                                                                                                                                                                                                                                                                                                                                                                                                                                                                                                                                                                                                           |
| ProxUt | DOWN | TAC3         | tachykinin 3(TAC3)                                             | GO:0007217-tachykinin receptor signaling pathway,GO:0007218-neuropeptide signaling pathway,                                                                                                                                                                                                                                                                                                                                                                                                                                                                                                                                                                                                                                                                                                                                                                                                                                                                                                                                                                                              |
| ProxUt | DOWN | PTPN1        | protein tyrosine phosphatase, non-receptor type 1(PTPN1)       | GO:0007257-activation of JUN kinase activity,GO:0008286-insulin receptor signaling pathway,GO:0030100-regulation of endocytosis,GO:0030948-negative regulation of vascular endothelial growth factor receptor signaling pathway,GO:0031532-actin cytoskeleton reorganization,GO:0033157-regulation of intracellular protein transport,GO:0035791-platelet-derived growth factor receptor-beta signaling pathway,GO:0036498-IRE1-mediated unfolded protein response,GO:0043407-negative regulation of MAP kinase activity,GO:0061098-positive regulation of protein tyrosine kinase activity,GO:0070373-negative regulation of ERK1 and ERK2 cascade,GO:1902202-regulation of hepatocyte growth factor receptor signaling pathway,GO:1902236-negative regulation of endoplasmic reticulum stress-induced intrinsic apoptotic signaling pathway,GO:1903898-negative regulation of PERK-mediated unfolded protein response,GO:1990264-peptidyl-tyrosine dephosphorylation involved in inactivation of protein kinase activity,GO:2000646-positive regulation of receptor catabolic process, |
| ProxUt | DOWN | RAB32        | RAB32, member RAS oncogene family(RAB32)                       | GO:0007264-small GTPase mediated signal transduction,GO:0019882-antigen processing and presentation,GO:0032438-melanosome organization,GO:0035646-endosome to melanosome transport,GO:0090382-phagosome maturation,GO:1903232-melanosome assembly,                                                                                                                                                                                                                                                                                                                                                                                                                                                                                                                                                                                                                                                                                                                                                                                                                                       |
| ProxUt | DOWN | RAP2C        | RAP2C, member of RAS oncogene family(RAP2C)                    | GO:0007264-small GTPase mediated signal transduction,GO:0030336-negative regulation of cell migration,GO:0031954-positive regulation of protein autophosphorylation,GO:0032486-Rap protein signal transduction,GO:0061097-regulation of protein tyrosine kinase activity,GO:0090557-establishment of endothelial intestinal barrier,                                                                                                                                                                                                                                                                                                                                                                                                                                                                                                                                                                                                                                                                                                                                                     |
| ProxUt | DOWN | ABHD2        | abhydrolase domain containing 2(ABHD2)                         | GO:0007340-acrosome reaction,GO:0009611-response to wounding,GO:0030336-negative regulation of cell migration,GO:0032570-response to progesterone,GO:0046464-acylglycerol catabolic process,GO:0048240-sperm capacitation,                                                                                                                                                                                                                                                                                                                                                                                                                                                                                                                                                                                                                                                                                                                                                                                                                                                               |
| ProxUt | DOWN | MORC3        | MORC family CW-type zinc finger 3(MORC3)                       | GO:0007569-cell aging,GO:0009791-post-embryonic development,GO:0018105-peptidyl-serine phosphorylation,GO:0048147-negative regulation of fibroblast proliferation,GO:0050821-protein stabilization,GO:0051457-maintenance of protein location in nucleus,                                                                                                                                                                                                                                                                                                                                                                                                                                                                                                                                                                                                                                                                                                                                                                                                                                |
| ProxUt | DOWN | LUM          | lumican(LUM)                                                   | GO:0007601-visual perception,GO:0030199-collagen fibril organization,GO:0032914-positive regulation of transforming growth factor beta1 production,GO:0045944-positive regulation of transcription from RNA polymerase II promoter,                                                                                                                                                                                                                                                                                                                                                                                                                                                                                                                                                                                                                                                                                                                                                                                                                                                      |
| ProxUt | DOWN | AFF2         | Af4/FMR2 family member 2(AFF2)                                 | GO:0007611-learning or memory,GO:0043484-regulation of RNA splicing,                                                                                                                                                                                                                                                                                                                                                                                                                                                                                                                                                                                                                                                                                                                                                                                                                                                                                                                                                                                                                     |
| ProxUt | DOWN | EPHA4        | EPH receptor A4(EPHA4)                                         | GO:0007628-adult walking behavior,GO:0008045-motor neuron axon guidance,GO:0018108-peptidyl-tyrosine phosphorylation,GO:0021957-corticospinal tract morphogenesis,GO:0043507-positive regulation of JUN kinase activity,GO:0046777-protein autophosphorylation,GO:0048681-negative regulation of axon regeneration,GO:0048710-regulation of astrocyte differentiation,GO:0050770-regulation of axonogenesis,GO:0061001-regulation of dendritic spine morphogenesis,GO:0072178-nephric duct morphogenesis,GO:0097155-fasciculation of sensory neuron axon,GO:0097156-fasciculation of motor neuron axon,GO:2001108-positive regulation of Rho guanyl-nucleotide exchange factor activity,                                                                                                                                                                                                                                                                                                                                                                                                 |
| ProxUt | DOWN | LOC100736973 | ras-related protein Rap-1b(LOC100736973)                       | GO:0008283-cell proliferation,GO:0032486-Rap protein signal transduction,GO:0061028-establishment of endothelial barrier,GO:0070374-positive regulation of ERK1 and ERK2 cascade,GO:0071320-cellular response to cAMP,GO:1901888-regulation of cell junction assembly,GO:2000114-regulation of establishment of cell polarity,GO:2000301-negative regulation of synaptic vesicle exocytosis,                                                                                                                                                                                                                                                                                                                                                                                                                                                                                                                                                                                                                                                                                             |
| ProxUt | DOWN | FRZB         | frizzled-related protein(FRZB)                                 | GO:0008285-negative regulation of cell proliferation,GO:0010721-negative regulation of cell development,GO:0014033-neural crest cell differentiation,GO:0030308-negative regulation of cell growth,GO:0035567-non-canonical Wnt signaling pathway,GO:0043065-positive regulation of apoptotic process,GO:0045600-positive regulation of fat cell differentiation,GO:0060029-convergent extension involved in organogenesis,GO:0060070-canonical Wnt signaling pathway,GO:0061037-negative regulation of cartilage development,GO:0061053-somite development,GO:0070367-negative regulation of hepatocyte differentiation,GO:0090090-negative regulation of canonical Wnt signaling pathway,GO:0090103-cochlea morphogenesis,                                                                                                                                                                                                                                                                                                                                                             |



|        |      |              |                                                                           |                                                                                                                                                                                                                                                                                                                                                                                                                                                                                                                                                                                                                                                                                                                                                                                                                                                                                                                                                                                                                                                                                                                                                                                                                                                                                       |
|--------|------|--------------|---------------------------------------------------------------------------|---------------------------------------------------------------------------------------------------------------------------------------------------------------------------------------------------------------------------------------------------------------------------------------------------------------------------------------------------------------------------------------------------------------------------------------------------------------------------------------------------------------------------------------------------------------------------------------------------------------------------------------------------------------------------------------------------------------------------------------------------------------------------------------------------------------------------------------------------------------------------------------------------------------------------------------------------------------------------------------------------------------------------------------------------------------------------------------------------------------------------------------------------------------------------------------------------------------------------------------------------------------------------------------|
| ProxUt | DOWN | LOC100623707 | phosphatidylinositol 3-kinase regulatory subunit alpha-like(LOC100623707) | GO:0008286-insulin receptor signaling pathway,GO:0043551-regulation of phosphatidylinositol 3-kinase activity,GO:0046854-phosphatidylinositol phosphorylation,                                                                                                                                                                                                                                                                                                                                                                                                                                                                                                                                                                                                                                                                                                                                                                                                                                                                                                                                                                                                                                                                                                                        |
| ProxUt | DOWN | ADAM22       | ADAM metalloproteinase domain 22(ADAM22)                                  | GO:0008344-adult locomotory behavior,GO:0022011-myelination in peripheral nervous system,                                                                                                                                                                                                                                                                                                                                                                                                                                                                                                                                                                                                                                                                                                                                                                                                                                                                                                                                                                                                                                                                                                                                                                                             |
| ProxUt | DOWN | DRAM1        | DNA damage regulated autophagy modulator 1(DRAM1)                         | GO:0010506-regulation of autophagy,                                                                                                                                                                                                                                                                                                                                                                                                                                                                                                                                                                                                                                                                                                                                                                                                                                                                                                                                                                                                                                                                                                                                                                                                                                                   |
| ProxUt | DOWN | AGR2         | anterior gradient 2, protein disulphide isomerase family member(AGR2)     | GO:0010628-positive regulation of gene expression,GO:0010811-positive regulation of cell-substrate adhesion,GO:0030154-cell differentiation,GO:0045742-positive regulation of epidermal growth factor receptor signaling pathway,GO:0048546-digestive tract morphogenesis,GO:0048639-positive regulation of developmental growth,GO:0060480-lung goblet cell differentiation,GO:0060548-negative regulation of cell death,GO:0070254-mucus secretion,GO:0090004-positive regulation of establishment of protein localization to plasma membrane,GO:1903896-positive regulation of IRE1-mediated unfolded protein response,GO:1903899-positive regulation of PERK-mediated unfolded protein response,                                                                                                                                                                                                                                                                                                                                                                                                                                                                                                                                                                                  |
| ProxUt | DOWN | FAP          | fibroblast activation protein alpha(FAP)                                  | GO:0010710-regulation of collagen catabolic process,GO:0010716-negative regulation of extracellular matrix disassembly,GO:0043542-endothelial cell migration,GO:0051603-proteolysis involved in cellular protein catabolic process,GO:0060244-negative regulation of cell proliferation involved in contact inhibition,GO:0071158-positive regulation of cell cycle arrest,GO:0097325-melanocyte proliferation,GO:1900119-positive regulation of execution phase of apoptosis,GO:1902362-melanocyte apoptotic process,                                                                                                                                                                                                                                                                                                                                                                                                                                                                                                                                                                                                                                                                                                                                                                |
| ProxUt | DOWN | BMP1         | bone morphogenetic protein 1(BMP1)                                        | GO:0010862-positive regulation of pathway-restricted SMAD protein phosphorylation,GO:0030509-BMP signaling pathway,GO:0042981-regulation of apoptotic process,GO:0043408-regulation of MAPK cascade,GO:0048468-cell development,GO:0060395-SMAD protein signal transduction,GO:0061036-positive regulation of cartilage development,                                                                                                                                                                                                                                                                                                                                                                                                                                                                                                                                                                                                                                                                                                                                                                                                                                                                                                                                                  |
| ProxUt | DOWN | CLIC2        | chloride intracellular channel 2(CLIC2)                                   | GO:0010880-regulation of release of sequestered calcium ion into cytosol by sarcoplasmic reticulum,GO:0051099-positive regulation of binding,GO:0060315-negative regulation of ryanodine-sensitive calcium-release channel activity,GO:1902476-chloride transmembrane transport,                                                                                                                                                                                                                                                                                                                                                                                                                                                                                                                                                                                                                                                                                                                                                                                                                                                                                                                                                                                                      |
| ProxUt | DOWN | IER3         | immediate early response 3(IER3)                                          | GO:0010941-regulation of cell death,GO:0043066-negative regulation of apoptotic process,GO:2001020-regulation of response to DNA damage stimulus,                                                                                                                                                                                                                                                                                                                                                                                                                                                                                                                                                                                                                                                                                                                                                                                                                                                                                                                                                                                                                                                                                                                                     |
| ProxUt | DOWN | STEAP2       | STEAP2 metalloenductase(STEAP2)                                           | GO:0015677-copper ion import,GO:0097461-ferric iron import into cell,                                                                                                                                                                                                                                                                                                                                                                                                                                                                                                                                                                                                                                                                                                                                                                                                                                                                                                                                                                                                                                                                                                                                                                                                                 |
| ProxUt | DOWN | SEC22B       | SEC22 homolog B, vesicle trafficking protein(SEC22B)                      | GO:0016192-vesicle-mediated transport,                                                                                                                                                                                                                                                                                                                                                                                                                                                                                                                                                                                                                                                                                                                                                                                                                                                                                                                                                                                                                                                                                                                                                                                                                                                |
| ProxUt | DOWN | CLINT1       | clathrin interactor 1(CLINT1)                                             | GO:0016192-vesicle-mediated transport,                                                                                                                                                                                                                                                                                                                                                                                                                                                                                                                                                                                                                                                                                                                                                                                                                                                                                                                                                                                                                                                                                                                                                                                                                                                |
| ProxUt | DOWN | SDC2         | syndecan 2(SDC2)                                                          | GO:0016477-cell migration,GO:0048813-dendrite morphogenesis,GO:0048814-regulation of dendrite morphogenesis,                                                                                                                                                                                                                                                                                                                                                                                                                                                                                                                                                                                                                                                                                                                                                                                                                                                                                                                                                                                                                                                                                                                                                                          |
| ProxUt | DOWN | FBXL5        | F-box and leucine rich repeat protein 5(FBXL5)                            | GO:0016567-protein ubiquitination,GO:0031146-SCF-dependent proteasomal ubiquitin-dependent protein catabolic process,GO:0055072-iron ion homeostasis,GO:1903364-positive regulation of cellular protein catabolic process,                                                                                                                                                                                                                                                                                                                                                                                                                                                                                                                                                                                                                                                                                                                                                                                                                                                                                                                                                                                                                                                            |
| ProxUt | DOWN | FBLN1        | fibulin 1(FBLN1)                                                          | GO:0030198-extracellular matrix organization,                                                                                                                                                                                                                                                                                                                                                                                                                                                                                                                                                                                                                                                                                                                                                                                                                                                                                                                                                                                                                                                                                                                                                                                                                                         |
| ProxUt | DOWN | CRISPLD2     | cysteine rich secretory protein LCCL domain containing 2(CRISPLD2)        | GO:0030198-extracellular matrix organization,GO:0060325-face morphogenesis,                                                                                                                                                                                                                                                                                                                                                                                                                                                                                                                                                                                                                                                                                                                                                                                                                                                                                                                                                                                                                                                                                                                                                                                                           |
| ProxUt | DOWN | SLC12A2      | solute carrier family 12 member 2(SLC12A2)                                | GO:0030321-trans epithelial chloride transport,GO:0070634-trans epithelial ammonium transport,                                                                                                                                                                                                                                                                                                                                                                                                                                                                                                                                                                                                                                                                                                                                                                                                                                                                                                                                                                                                                                                                                                                                                                                        |
| ProxUt | DOWN | HSD11B1      | hydroxysteroid 11-beta dehydrogenase 1(HSD11B1)                           | GO:0030324-lung development,                                                                                                                                                                                                                                                                                                                                                                                                                                                                                                                                                                                                                                                                                                                                                                                                                                                                                                                                                                                                                                                                                                                                                                                                                                                          |
| ProxUt | DOWN | ERLEC1       | endoplasmic reticulum lectin 1(ERLEC1)                                    | GO:0030433-ER-associated ubiquitin-dependent protein catabolic process,GO:0030970-retrograde protein transport, ER to cytosol,GO:1904153-negative regulation of retrograde protein transport, ER to cytosol,                                                                                                                                                                                                                                                                                                                                                                                                                                                                                                                                                                                                                                                                                                                                                                                                                                                                                                                                                                                                                                                                          |
| ProxUt | DOWN | OMD          | osteomodulin(OMD)                                                         | GO:0030500-regulation of bone mineralization,                                                                                                                                                                                                                                                                                                                                                                                                                                                                                                                                                                                                                                                                                                                                                                                                                                                                                                                                                                                                                                                                                                                                                                                                                                         |
| ProxUt | DOWN | CREB3L1      | cAMP responsive element binding protein 3 like 1(CREB3L1)                 | GO:0030968-endoplasmic reticulum unfolded protein response,GO:0045944-positive regulation of transcription from RNA polymerase II promoter,                                                                                                                                                                                                                                                                                                                                                                                                                                                                                                                                                                                                                                                                                                                                                                                                                                                                                                                                                                                                                                                                                                                                           |
| ProxUt | DOWN | SIPA1L1      | signal induced proliferation associated 1 like 1(SIPA1L1)                 | GO:0031532-actin cytoskeleton reorganization,GO:0048013-ephrin receptor signaling pathway,GO:0048814-regulation of dendrite morphogenesis,GO:0050770-regulation of axonogenesis,GO:0051056-regulation of small GTPase mediated signal transduction,                                                                                                                                                                                                                                                                                                                                                                                                                                                                                                                                                                                                                                                                                                                                                                                                                                                                                                                                                                                                                                   |
| ProxUt | DOWN | PPP4R4       | protein phosphatase 4 regulatory subunit 4(PPP4R4)                        | GO:0032515-negative regulation of phosphoprotein phosphatase activity,GO:0080163-regulation of protein serine/threonine phosphatase activity,                                                                                                                                                                                                                                                                                                                                                                                                                                                                                                                                                                                                                                                                                                                                                                                                                                                                                                                                                                                                                                                                                                                                         |
| ProxUt | DOWN | PLEKHG2      | pleckstrin homology and RhoGEF domain containing G2(PLEKHG2)              | GO:0035023-regulation of Rho protein signal transduction,                                                                                                                                                                                                                                                                                                                                                                                                                                                                                                                                                                                                                                                                                                                                                                                                                                                                                                                                                                                                                                                                                                                                                                                                                             |
| ProxUt | DOWN | PDP1         | pyruvate dehydrogenase phosphatase catalytic subunit 1(PDP1)              | GO:0035970-peptidyl-threonine dephosphorylation,                                                                                                                                                                                                                                                                                                                                                                                                                                                                                                                                                                                                                                                                                                                                                                                                                                                                                                                                                                                                                                                                                                                                                                                                                                      |
| ProxUt | DOWN | COL7A1       | collagen type VII alpha 1 chain(COL7A1)                                   | GO:0035987-endothelial cell differentiation,                                                                                                                                                                                                                                                                                                                                                                                                                                                                                                                                                                                                                                                                                                                                                                                                                                                                                                                                                                                                                                                                                                                                                                                                                                          |
| ProxUt | DOWN | FGFR1OP2     | FGFR1 oncogene partner 2(FGFR1OP2)                                        | GO:0042060-wound healing,                                                                                                                                                                                                                                                                                                                                                                                                                                                                                                                                                                                                                                                                                                                                                                                                                                                                                                                                                                                                                                                                                                                                                                                                                                                             |
| ProxUt | DOWN | MDFIC        | MyoD family inhibitor domain containing(MDFIC)                            | GO:0042308-negative regulation of protein import into nucleus,GO:0045892-negative regulation of transcription, DNA-templated,GO:0050434-positive regulation of viral transcription,                                                                                                                                                                                                                                                                                                                                                                                                                                                                                                                                                                                                                                                                                                                                                                                                                                                                                                                                                                                                                                                                                                   |
| ProxUt | DOWN | ADAMTS9      | ADAM metalloproteinase with thrombospondin type 1 motif 9(ADAMTS9)        | GO:0045636-positive regulation of melanocyte differentiation,                                                                                                                                                                                                                                                                                                                                                                                                                                                                                                                                                                                                                                                                                                                                                                                                                                                                                                                                                                                                                                                                                                                                                                                                                         |
| ProxUt | DOWN | BRINP2       | BMP/retinoic acid inducible neural specific 2(BRINP2)                     | GO:0045666-positive regulation of neuron differentiation,GO:0045930-negative regulation of mitotic cell cycle,GO:0071300-cellular response to retinoic acid,                                                                                                                                                                                                                                                                                                                                                                                                                                                                                                                                                                                                                                                                                                                                                                                                                                                                                                                                                                                                                                                                                                                          |
| ProxUt | DOWN | MFAP2        | microfibrillar associated protein 2(MFAP2)                                | GO:0048048-embryonic eye morphogenesis,GO:0048050-post-embryonic eye morphogenesis,                                                                                                                                                                                                                                                                                                                                                                                                                                                                                                                                                                                                                                                                                                                                                                                                                                                                                                                                                                                                                                                                                                                                                                                                   |
| ProxUt | DOWN | FKBP7        | FK506 binding protein 7(FKBP7)                                            | GO:0061077-chaperone-mediated protein folding,                                                                                                                                                                                                                                                                                                                                                                                                                                                                                                                                                                                                                                                                                                                                                                                                                                                                                                                                                                                                                                                                                                                                                                                                                                        |
| ProxUt | DOWN | UACA         | uveal autoantigen with coiled-coil domains and ankyrin repeats(UACA)      | GO:0097190-apoptotic signaling pathway,GO:1901222-regulation of NIK/NF-kappaB signaling,                                                                                                                                                                                                                                                                                                                                                                                                                                                                                                                                                                                                                                                                                                                                                                                                                                                                                                                                                                                                                                                                                                                                                                                              |
| ProxUt | DOWN | LOC100513074 | serine protease inhibitor Kazal-type 9(LOC100513074)                      | GO:1900004-negative regulation of serine-type endopeptidase activity,                                                                                                                                                                                                                                                                                                                                                                                                                                                                                                                                                                                                                                                                                                                                                                                                                                                                                                                                                                                                                                                                                                                                                                                                                 |
| ProxUt | DOWN | LOC100517015 | cAMP-dependent protein kinase inhibitor beta-like(LOC100517015)           | GO:2000480-negative regulation of cAMP-dependent protein kinase activity,                                                                                                                                                                                                                                                                                                                                                                                                                                                                                                                                                                                                                                                                                                                                                                                                                                                                                                                                                                                                                                                                                                                                                                                                             |
| UTJ    | UP   | EP300        | E1A binding protein p300(EP300)                                           | GO:0000122-negative regulation of transcription from RNA polymerase II promoter,GO:0001666-response to hypoxia,GO:0001756-somitogenesis,GO:0006355-regulation of transcription, DNA-templated,GO:0006990-positive regulation of transcription from RNA polymerase II promoter involved in unfolded protein response,GO:0007507-heart development,GO:0007519-skeletal muscle tissue development,GO:0007623-circadian rhythm,GO:0009887-organ morphogenesis,GO:0018076-N-terminal peptidyl-lysine acetylation,GO:0030183-B cell differentiation,GO:0030220-platelet formation,GO:0030324-lung development,GO:0032092-positive regulation of protein binding,GO:0034644-cellular response to UV,GO:0035855-megakaryocyte development,GO:0042771-intrinsic apoptotic signaling pathway in response to DNA damage by p53 class mediator,GO:0043627-response to estrogen,GO:0043923-positive regulation by host of viral transcription,GO:0043967-histone H4 acetylation,GO:0043969-histone H2B acetylation,GO:0045444-fat cell differentiation,GO:0050821-protein stabilization,GO:0051091-positive regulation of sequence-specific DNA binding transcription factor activity,GO:0060765-regulation of androgen receptor signaling pathway,GO:0090043-regulation of tubulin deacetylation, |
| UTJ    | UP   | TSHZ2        | teashirt zinc finger homeobox 2(TSHZ2)                                    | GO:0000122-negative regulation of transcription from RNA polymerase II promoter,GO:0006351-transcription, DNA-templated,GO:0006357-regulation of transcription from RNA polymerase II promoter,GO:0007275-multicellular organism development,GO:0010468-regulation of gene expression,                                                                                                                                                                                                                                                                                                                                                                                                                                                                                                                                                                                                                                                                                                                                                                                                                                                                                                                                                                                                |
| UTJ    | UP   | LOC100627422 | ligand-dependent corepressor(LOC100627422)                                | GO:0000122-negative regulation of transcription from RNA polymerase II promoter,GO:0006366-transcription from RNA polymerase II promoter,                                                                                                                                                                                                                                                                                                                                                                                                                                                                                                                                                                                                                                                                                                                                                                                                                                                                                                                                                                                                                                                                                                                                             |

|     |    |              |                                                                |                                                                                                                                                                                                                                                                                                                                                                                                                                                                                                                                                                                                                                                                                                                                                                                                                                                                                                                                                                                                                                                                                                                                                                                                                                                                                                                                                                                                                                                                                                                                                                                                                                                                                                                                                                                                                                                                                                                                                                                                                                                                                                                                                                                                                                                                                                                                                                                                 |
|-----|----|--------------|----------------------------------------------------------------|-------------------------------------------------------------------------------------------------------------------------------------------------------------------------------------------------------------------------------------------------------------------------------------------------------------------------------------------------------------------------------------------------------------------------------------------------------------------------------------------------------------------------------------------------------------------------------------------------------------------------------------------------------------------------------------------------------------------------------------------------------------------------------------------------------------------------------------------------------------------------------------------------------------------------------------------------------------------------------------------------------------------------------------------------------------------------------------------------------------------------------------------------------------------------------------------------------------------------------------------------------------------------------------------------------------------------------------------------------------------------------------------------------------------------------------------------------------------------------------------------------------------------------------------------------------------------------------------------------------------------------------------------------------------------------------------------------------------------------------------------------------------------------------------------------------------------------------------------------------------------------------------------------------------------------------------------------------------------------------------------------------------------------------------------------------------------------------------------------------------------------------------------------------------------------------------------------------------------------------------------------------------------------------------------------------------------------------------------------------------------------------------------|
| UTJ | UP | TTL6         | tubulin tyrosine ligase like 6(TTL6)                           | GO:001578-microtubule bundle formation,GO:0003353-positive regulation of cilium movement,GO:0018095-protein polyglutamylation,GO:0051013-microtubule severing,                                                                                                                                                                                                                                                                                                                                                                                                                                                                                                                                                                                                                                                                                                                                                                                                                                                                                                                                                                                                                                                                                                                                                                                                                                                                                                                                                                                                                                                                                                                                                                                                                                                                                                                                                                                                                                                                                                                                                                                                                                                                                                                                                                                                                                  |
| UTJ | UP | BMPER        | BMP binding endothelial regulator(BMPER)                       | GO:0001657-ureteric bud development,GO:0002043-blood vessel endothelial cell proliferation involved in sprouting angiogenesis,GO:0010594-regulation of endothelial cell migration,GO:0030514-negative regulation of BMP signaling pathway,GO:0042118-endothelial cell activation,GO:0045446-endothelial cell differentiation,GO:0048839-inner ear development,GO:0060393-regulation of pathway-restricted SMAD protein phosphorylation,GO:0070374-positive regulation of ERK1 and ERK2 cascade,                                                                                                                                                                                                                                                                                                                                                                                                                                                                                                                                                                                                                                                                                                                                                                                                                                                                                                                                                                                                                                                                                                                                                                                                                                                                                                                                                                                                                                                                                                                                                                                                                                                                                                                                                                                                                                                                                                 |
| UTJ | UP | CTDSP1       | CTD small phosphatase like(CTDSP1)                             | GO:001933-negative regulation of protein phosphorylation,GO:2000134-negative regulation of G1/S transition of mitotic cell cycle,                                                                                                                                                                                                                                                                                                                                                                                                                                                                                                                                                                                                                                                                                                                                                                                                                                                                                                                                                                                                                                                                                                                                                                                                                                                                                                                                                                                                                                                                                                                                                                                                                                                                                                                                                                                                                                                                                                                                                                                                                                                                                                                                                                                                                                                               |
| UTJ | UP | CA9          | carbonic anhydrase 9(CA9)                                      | GO:0002009-morphogenesis of an epithelium,GO:0006730-one-carbon metabolic process,GO:0046903-secretion,                                                                                                                                                                                                                                                                                                                                                                                                                                                                                                                                                                                                                                                                                                                                                                                                                                                                                                                                                                                                                                                                                                                                                                                                                                                                                                                                                                                                                                                                                                                                                                                                                                                                                                                                                                                                                                                                                                                                                                                                                                                                                                                                                                                                                                                                                         |
| UTJ | UP | ARRB1        | arrestin beta 1(ARRB1)                                         | GO:0002031-G-protein coupled receptor internalization,GO:0002092-positive regulation of receptor internalization,GO:0006366-transcription from RNA polymerase II promoter,GO:0007602-phototransduction,GO:0016567-protein ubiquitination,GO:0031397-negative regulation of protein ubiquitination,GO:0032088-negative regulation of NF-kappaB transcription factor activity,GO:0032092-positive regulation of protein binding,GO:0032715-negative regulation of interleukin-6 production,GO:0032717-negative regulation of interleukin-8 production,GO:0033138-positive regulation of peptidyl-serine phosphorylation,GO:0035025-positive regulation of Rho protein signal transduction,GO:0035774-positive regulation of insulin secretion involved in cellular response to glucose stimulus,GO:0043149-stress fiber assembly,GO:0043161-proteasome-mediated ubiquitin-dependent protein catabolic process,GO:0045944-positive regulation of transcription from RNA polymerase II promoter,GO:0070374-positive regulation of ERK1 and ERK2 cascade,GO:0090240-positive regulation of histone H4 acetylation,                                                                                                                                                                                                                                                                                                                                                                                                                                                                                                                                                                                                                                                                                                                                                                                                                                                                                                                                                                                                                                                                                                                                                                                                                                                                                   |
| UTJ | UP | RDH10        | retinol dehydrogenase 10 (all-trans)(RDH10)                    | GO:002138-retinoic acid biosynthetic process,                                                                                                                                                                                                                                                                                                                                                                                                                                                                                                                                                                                                                                                                                                                                                                                                                                                                                                                                                                                                                                                                                                                                                                                                                                                                                                                                                                                                                                                                                                                                                                                                                                                                                                                                                                                                                                                                                                                                                                                                                                                                                                                                                                                                                                                                                                                                                   |
| UTJ | UP | JAK2         | Janus kinase 2(JAK2)                                           | GO:0002250-adaptive immune response,GO:0006954-inflammatory response,GO:0007165-signal transduction,GO:0007169-transmembrane receptor protein tyrosine kinase signaling pathway,GO:0007260-tyrosine phosphorylation of STAT protein,GO:0010811-positive regulation of cell-substrate adhesion,GO:0016477-cell migration,GO:0019221-cytokine-mediated signaling pathway,GO:0030155-regulation of cell adhesion,GO:0030218-erythrocyte differentiation,GO:0033209-tumor necrosis factor-mediated signaling pathway,GO:0035409-histone H3-Y41 phosphorylation,GO:0035556-intracellular signal transduction,GO:0035722-interleukin-12-mediated signaling pathway,GO:0038083-peptidyl-tyrosine autophosphorylation,GO:0042127-regulation of cell proliferation,GO:0042517-positive regulation of tyrosine phosphorylation of Stat3 protein,GO:0042977-activation of JAK2 kinase activity,GO:0042981-regulation of apoptotic process,GO:0045087-innate immune response,GO:0046677-response to antibiotic,GO:0046777-protein autophosphorylation,GO:0050727-regulation of inflammatory response,GO:0060396-growth hormone receptor signaling pathway,GO:0060397-JAK-STAT cascade involved in growth hormone signaling pathway,                                                                                                                                                                                                                                                                                                                                                                                                                                                                                                                                                                                                                                                                                                                                                                                                                                                                                                                                                                                                                                                                                                                                                                         |
| UTJ | UP | HAVCR2       | hepatitis A virus cellular receptor 2(HAVCR2)                  | GO:0002281-macrophage activation involved in immune response,GO:0002519-natural killer cell tolerance induction,GO:0002652-regulation of tolerance induction dependent upon immune response,GO:0002826-negative regulation of T-helper 1 type immune response,GO:0002859-negative regulation of natural killer cell mediated cytotoxicity directed against tumor cell target,GO:0010629-negative regulation of gene expression,GO:0030886-negative regulation of myeloid dendritic cell activation,GO:0032088-negative regulation of NF-kappaB transcription factor activity,GO:0032687-negative regulation of interferon-alpha production,GO:0032689-negative regulation of interferon-gamma production,GO:0032703-negative regulation of interleukin-2 production,GO:0032712-negative regulation of interleukin-3 production,GO:0032715-negative regulation of interleukin-6 production,GO:0032720-negative regulation of tumor necrosis factor production,GO:0032722-positive regulation of chemokine production,GO:0032729-positive regulation of interferon-gamma production,GO:0032732-positive regulation of interleukin-1 production,GO:0032753-positive regulation of interleukin-4 production,GO:0032815-negative regulation of natural killer cell activation,GO:0034138-toll-like receptor 3 signaling pathway,GO:0034154-toll-like receptor 7 signaling pathway,GO:0034162-toll-like receptor 9 signaling pathway,GO:0042102-positive regulation of T cell proliferation,GO:0042130-negative regulation of T cell proliferation,GO:0043032-positive regulation of macrophage activation,GO:0050830-defense response to Gram-positive bacterium,GO:0060135-maternal process involved in female pregnancy,GO:0070374-positive regulation of ERK1 and ERK2 cascade,GO:0071222-cellular response to lipopolysaccharide,GO:0071656-negative regulation of granulocyte colony-stimulating factor production,GO:1900425-negative regulation of defense response to bacterium,GO:1900426-positive regulation of defense response to bacterium,GO:1901224-positive regulation of NIK/NF-kappaB signaling,GO:1904469-positive regulation of tumor necrosis factor secretion,GO:2000521-negative regulation of immunological synapse formation,GO:2001189-negative regulation of T cell activation via T cell receptor contact with antigen bound to MHC molecule on antigen presenting cell, |
| UTJ | UP | RENBP        | renin binding protein(RENBP)                                   | GO:0006044-N-acetylglucosamine metabolic process,GO:0010951-negative regulation of endopeptidase activity,GO:0019262-N-acetylneuraminate catabolic process,                                                                                                                                                                                                                                                                                                                                                                                                                                                                                                                                                                                                                                                                                                                                                                                                                                                                                                                                                                                                                                                                                                                                                                                                                                                                                                                                                                                                                                                                                                                                                                                                                                                                                                                                                                                                                                                                                                                                                                                                                                                                                                                                                                                                                                     |
| UTJ | UP | UAP1         | UDP-N-acetylglucosamine pyrophosphorylase 1(UAP1)              | GO:0006048-UDP-N-acetylglucosamine biosynthetic process,                                                                                                                                                                                                                                                                                                                                                                                                                                                                                                                                                                                                                                                                                                                                                                                                                                                                                                                                                                                                                                                                                                                                                                                                                                                                                                                                                                                                                                                                                                                                                                                                                                                                                                                                                                                                                                                                                                                                                                                                                                                                                                                                                                                                                                                                                                                                        |
| UTJ | UP | ALDH2        | aldehyde dehydrogenase 2 family (mitochondrial)(ALDH2)         | GO:0006068-ethanol catabolic process,GO:0055114-oxidation-reduction process,                                                                                                                                                                                                                                                                                                                                                                                                                                                                                                                                                                                                                                                                                                                                                                                                                                                                                                                                                                                                                                                                                                                                                                                                                                                                                                                                                                                                                                                                                                                                                                                                                                                                                                                                                                                                                                                                                                                                                                                                                                                                                                                                                                                                                                                                                                                    |
| UTJ | UP | LOC100154396 | sister chromatid cohesion protein PDS5 homolog B(LOC100154396) | GO:0006281-DNA repair,GO:0007064-mitotic sister chromatid cohesion,                                                                                                                                                                                                                                                                                                                                                                                                                                                                                                                                                                                                                                                                                                                                                                                                                                                                                                                                                                                                                                                                                                                                                                                                                                                                                                                                                                                                                                                                                                                                                                                                                                                                                                                                                                                                                                                                                                                                                                                                                                                                                                                                                                                                                                                                                                                             |
| UTJ | UP | IRF2         | interferon regulatory factor 2(IRF2)                           | GO:0006351-transcription, DNA-templated,GO:0008283-cell proliferation,                                                                                                                                                                                                                                                                                                                                                                                                                                                                                                                                                                                                                                                                                                                                                                                                                                                                                                                                                                                                                                                                                                                                                                                                                                                                                                                                                                                                                                                                                                                                                                                                                                                                                                                                                                                                                                                                                                                                                                                                                                                                                                                                                                                                                                                                                                                          |
| UTJ | UP | MAFB         | MAF bZIP transcription factor B(MAFB)                          | GO:0006357-regulation of transcription from RNA polymerase II promoter,GO:0007379-segment specification,GO:0007399-nervous system development,GO:0007585-respiratory gaseous exchange,GO:0021571-rhombomere 5 development,GO:0021572-rhombomere 6 development,GO:0033077-T cell differentiation in thymus,GO:0035284-brain segmentation,GO:0042472-inner ear morphogenesis,GO:0045647-negative regulation of erythrocyte differentiation,GO:0045671-negative regulation of osteoclast differentiation,GO:0048538-thymus development,                                                                                                                                                                                                                                                                                                                                                                                                                                                                                                                                                                                                                                                                                                                                                                                                                                                                                                                                                                                                                                                                                                                                                                                                                                                                                                                                                                                                                                                                                                                                                                                                                                                                                                                                                                                                                                                            |
| UTJ | UP | ZNF217       | zinc finger protein 217(ZNF217)                                | GO:0006366-transcription from RNA polymerase II promoter,GO:0007165-signal transduction,GO:0022008-neurogenesis,                                                                                                                                                                                                                                                                                                                                                                                                                                                                                                                                                                                                                                                                                                                                                                                                                                                                                                                                                                                                                                                                                                                                                                                                                                                                                                                                                                                                                                                                                                                                                                                                                                                                                                                                                                                                                                                                                                                                                                                                                                                                                                                                                                                                                                                                                |
| UTJ | UP | CHKA         | choline kinase alpha(CHKA)                                     | GO:0006646-phosphatidylethanolamine biosynthetic process,                                                                                                                                                                                                                                                                                                                                                                                                                                                                                                                                                                                                                                                                                                                                                                                                                                                                                                                                                                                                                                                                                                                                                                                                                                                                                                                                                                                                                                                                                                                                                                                                                                                                                                                                                                                                                                                                                                                                                                                                                                                                                                                                                                                                                                                                                                                                       |
| UTJ | UP | HPGD         | hydroxyprostaglandin dehydrogenase 15-(NAD)(HPGD)              | GO:0006693-prostaglandin metabolic process,GO:0007179-transforming growth factor beta receptor signaling pathway,GO:0007565-female pregnancy,GO:0007567-parturition,GO:0030728-ovulation,GO:0045786-negative regulation of cell cycle,GO:0070493-thrombin receptor signaling pathway,GO:0097070-ductus arteriosus closure,                                                                                                                                                                                                                                                                                                                                                                                                                                                                                                                                                                                                                                                                                                                                                                                                                                                                                                                                                                                                                                                                                                                                                                                                                                                                                                                                                                                                                                                                                                                                                                                                                                                                                                                                                                                                                                                                                                                                                                                                                                                                      |
| UTJ | UP | EPS15        | epidermal growth factor receptor pathway substrate 15(EPS15)   | GO:0006895-Golgi to endosome transport,GO:0019065-receptor-mediated endocytosis of virus by host cell,GO:0048268-clathrin coat assembly,                                                                                                                                                                                                                                                                                                                                                                                                                                                                                                                                                                                                                                                                                                                                                                                                                                                                                                                                                                                                                                                                                                                                                                                                                                                                                                                                                                                                                                                                                                                                                                                                                                                                                                                                                                                                                                                                                                                                                                                                                                                                                                                                                                                                                                                        |
| UTJ | UP | ELMO1        | engulfment and cell motility 1(ELMO1)                          | GO:0006911-phagocytosis,engulfment,GO:0016477-cell migration,GO:0016601-Rac protein signal transduction,GO:0030036-actin cytoskeleton organization,                                                                                                                                                                                                                                                                                                                                                                                                                                                                                                                                                                                                                                                                                                                                                                                                                                                                                                                                                                                                                                                                                                                                                                                                                                                                                                                                                                                                                                                                                                                                                                                                                                                                                                                                                                                                                                                                                                                                                                                                                                                                                                                                                                                                                                             |
| UTJ | UP | CD27         | CD27 molecule(CD27)                                            | GO:0006954-inflammatory response,GO:0006955-immune response,GO:0007420-brain development,GO:0008625-extrinsic apoptotic signaling pathway via death domain receptors,GO:0032496-response to lipopolysaccharide,GO:0042127-regulation of cell proliferation,GO:0043281-regulation of cysteine-type endopeptidase activity involved in apoptotic process,GO:0043410-positive regulation of MAPK cascade,GO:0046330-positive regulation of JNK cascade,GO:0070233-negative regulation of T cell apoptotic process,                                                                                                                                                                                                                                                                                                                                                                                                                                                                                                                                                                                                                                                                                                                                                                                                                                                                                                                                                                                                                                                                                                                                                                                                                                                                                                                                                                                                                                                                                                                                                                                                                                                                                                                                                                                                                                                                                 |
| UTJ | UP | CDC14A       | cell division cycle 14A(CDC14A)                                | GO:0007096-regulation of exit from mitosis,GO:0042384-cilium assembly,GO:0051256-mitotic spindle midzone assembly,GO:0071850-mitotic cell cycle arrest,                                                                                                                                                                                                                                                                                                                                                                                                                                                                                                                                                                                                                                                                                                                                                                                                                                                                                                                                                                                                                                                                                                                                                                                                                                                                                                                                                                                                                                                                                                                                                                                                                                                                                                                                                                                                                                                                                                                                                                                                                                                                                                                                                                                                                                         |
| UTJ | UP | ARHGAP20     | Rho GTPase activating protein 20(ARHGAP20)                     | GO:0007165-signal transduction,                                                                                                                                                                                                                                                                                                                                                                                                                                                                                                                                                                                                                                                                                                                                                                                                                                                                                                                                                                                                                                                                                                                                                                                                                                                                                                                                                                                                                                                                                                                                                                                                                                                                                                                                                                                                                                                                                                                                                                                                                                                                                                                                                                                                                                                                                                                                                                 |
| UTJ | UP | MYLIP        | myosin regulatory light chain interacting protein(MYLIP)       | GO:0007399-nervous system development,GO:0010989-negative regulation of low-density lipoprotein particle clearance,GO:0031648-protein destabilization,GO:0032803-regulation of low-density lipoprotein particle receptor catabolic process,GO:0042632-cholesterol homeostasis,GO:0042787-protein ubiquitination involved in ubiquitin-dependent protein catabolic process,GO:0045732-positive regulation of protein catabolic process,                                                                                                                                                                                                                                                                                                                                                                                                                                                                                                                                                                                                                                                                                                                                                                                                                                                                                                                                                                                                                                                                                                                                                                                                                                                                                                                                                                                                                                                                                                                                                                                                                                                                                                                                                                                                                                                                                                                                                          |
| UTJ | UP | ADAP2        | AdGAP with dual PH domains 2(ADAP2)                            | GO:0007507-heart development,                                                                                                                                                                                                                                                                                                                                                                                                                                                                                                                                                                                                                                                                                                                                                                                                                                                                                                                                                                                                                                                                                                                                                                                                                                                                                                                                                                                                                                                                                                                                                                                                                                                                                                                                                                                                                                                                                                                                                                                                                                                                                                                                                                                                                                                                                                                                                                   |
| UTJ | UP | DLEC1        | deleted in lung and esophageal cancer 1(DLEC1)                 | GO:0008285-negative regulation of cell proliferation,                                                                                                                                                                                                                                                                                                                                                                                                                                                                                                                                                                                                                                                                                                                                                                                                                                                                                                                                                                                                                                                                                                                                                                                                                                                                                                                                                                                                                                                                                                                                                                                                                                                                                                                                                                                                                                                                                                                                                                                                                                                                                                                                                                                                                                                                                                                                           |
| UTJ | UP | MTR          | 5-methyltetrahydrofolate-homocysteine methyltransferase(MTR)   | GO:0009235-cobalamin metabolic process,GO:0042558-pteridine-containing compound metabolic process,                                                                                                                                                                                                                                                                                                                                                                                                                                                                                                                                                                                                                                                                                                                                                                                                                                                                                                                                                                                                                                                                                                                                                                                                                                                                                                                                                                                                                                                                                                                                                                                                                                                                                                                                                                                                                                                                                                                                                                                                                                                                                                                                                                                                                                                                                              |

|     |      |          |                                                                                                |                                                                                                                                                                                                                                                                                                                                                                                                                                                                                                                                                                                                                                                                                                                                                                                                                                                                                                                                                        |
|-----|------|----------|------------------------------------------------------------------------------------------------|--------------------------------------------------------------------------------------------------------------------------------------------------------------------------------------------------------------------------------------------------------------------------------------------------------------------------------------------------------------------------------------------------------------------------------------------------------------------------------------------------------------------------------------------------------------------------------------------------------------------------------------------------------------------------------------------------------------------------------------------------------------------------------------------------------------------------------------------------------------------------------------------------------------------------------------------------------|
| UTJ | UP   | HIPK3    | homeodomain interacting protein kinase 3(HIPK3)                                                | GO:0009299-mRNA transcription,GO:0018105-peptidyl-serine phosphorylation,GO:0018107-peptidyl-threonine phosphorylation,GO:0043066-negative regulation of apoptotic process,GO:0043508-negative regulation of JUN kinase activity,                                                                                                                                                                                                                                                                                                                                                                                                                                                                                                                                                                                                                                                                                                                      |
| UTJ | UP   | CAMK1D   | calcium/calmodulin dependent protein kinase ID(CAMK1D)                                         | GO:0010976-positive regulation of neuron projection development,GO:0032793-positive regulation of CREB transcription factor activity,GO:0043065-positive regulation of apoptotic process,GO:0043066-negative regulation of apoptotic process,GO:0050766-positive regulation of phagocytosis,GO:0050773-regulation of dendrite development,GO:0060267-positive regulation of respiratory burst,GO:0090023-positive regulation of neutrophil chemotaxis,                                                                                                                                                                                                                                                                                                                                                                                                                                                                                                 |
| UTJ | UP   | CHDH     | choline dehydrogenase(CHDH)                                                                    | GO:0019285-glycine betaine biosynthetic process from choline,                                                                                                                                                                                                                                                                                                                                                                                                                                                                                                                                                                                                                                                                                                                                                                                                                                                                                          |
| UTJ | UP   | TEKT2    | tektin 2(TEKT2)                                                                                | GO:0030317-sperm motility,GO:0036159-inner dynein arm assembly,                                                                                                                                                                                                                                                                                                                                                                                                                                                                                                                                                                                                                                                                                                                                                                                                                                                                                        |
| UTJ | UP   | ANKZF1   | ankyrin repeat and zinc finger domain containing 1(ANKZF1)                                     | GO:0030433-ER-associated ubiquitin-dependent protein catabolic process,GO:0071630-nucleus-associated proteasomal ubiquitin-dependent protein catabolic process,GO:0072671-mitochondria-associated ubiquitin-dependent protein catabolic process,                                                                                                                                                                                                                                                                                                                                                                                                                                                                                                                                                                                                                                                                                                       |
| UTJ | UP   | C1QC     | complement C1q C chain(C1QC)                                                                   | GO:0030853-negative regulation of granulocyte differentiation,GO:0045650-negative regulation of macrophage differentiation,                                                                                                                                                                                                                                                                                                                                                                                                                                                                                                                                                                                                                                                                                                                                                                                                                            |
| UTJ | UP   | EPB41L1  | erythrocyte membrane protein band 4.1 like 1(EPB41L1)                                          | GO:0030866-cortical actin cytoskeleton organization,GO:0031032-actomyosin structure organization,                                                                                                                                                                                                                                                                                                                                                                                                                                                                                                                                                                                                                                                                                                                                                                                                                                                      |
| UTJ | UP   | STMND1   | stathmin domain containing 1(STMND1)                                                           | GO:0031110-regulation of microtubule polymerization or depolymerization,                                                                                                                                                                                                                                                                                                                                                                                                                                                                                                                                                                                                                                                                                                                                                                                                                                                                               |
| UTJ | UP   | RNF128   | ring finger protein 128, E3 ubiquitin protein ligase(RNF128)                                   | GO:0031647-regulation of protein stability,GO:0042036-negative regulation of cytokine biosynthetic process,                                                                                                                                                                                                                                                                                                                                                                                                                                                                                                                                                                                                                                                                                                                                                                                                                                            |
| UTJ | UP   | ECT2L    | epithelial cell transforming 2 like(ECT2L)                                                     | GO:0035023-regulation of Rho protein signal transduction,                                                                                                                                                                                                                                                                                                                                                                                                                                                                                                                                                                                                                                                                                                                                                                                                                                                                                              |
| UTJ | UP   | SLC2A12  | solute carrier family 2 member 12(SLC2A12)                                                     | GO:0035428-hexose transmembrane transport,GO:0046323-glucose import,                                                                                                                                                                                                                                                                                                                                                                                                                                                                                                                                                                                                                                                                                                                                                                                                                                                                                   |
| UTJ | UP   | CHN2     | chimerin 2(CHN2)                                                                               | GO:0035556-intracellular signal transduction,GO:0043087-regulation of GTPase activity,GO:0051056-regulation of small GTPase mediated signal transduction,                                                                                                                                                                                                                                                                                                                                                                                                                                                                                                                                                                                                                                                                                                                                                                                              |
| UTJ | UP   | JADE1    | jade family PHD finger 1(JADE1)                                                                | GO:0043966-histone H3 acetylation,GO:0043981-histone H4-K5 acetylation,GO:0043982-histone H4-K8 acetylation,GO:0043983-histone H4-K12 acetylation,GO:2000134-negative regulation of G1/S transition of mitotic cell cycle,                                                                                                                                                                                                                                                                                                                                                                                                                                                                                                                                                                                                                                                                                                                             |
| UTJ | UP   | DYRK1A   | dual specificity tyrosine phosphorylation regulated kinase 1A(DYRK1A)                          | GO:0046777-protein autophosphorylation,                                                                                                                                                                                                                                                                                                                                                                                                                                                                                                                                                                                                                                                                                                                                                                                                                                                                                                                |
| UTJ | UP   | KCNRG    | potassium channel regulator(KCNRG)                                                             | GO:0051260-protein homooligomerization,GO:1902260-negative regulation of delayed rectifier potassium channel activity,                                                                                                                                                                                                                                                                                                                                                                                                                                                                                                                                                                                                                                                                                                                                                                                                                                 |
| UTJ | DOWN | CALM2    | calmodulin 2(CALM2)                                                                            | GO:0000086-G2/M transition of mitotic cell cycle,GO:0002027-regulation of heart rate,GO:0005513-detection of calcium ion,GO:0010880-regulation of release of sequestered calcium ion into cytosol by sarcoplasmic reticulum,GO:0021762-substantia nigra development,GO:0030801-positive regulation of cyclic nucleotide metabolic process,GO:0032465-regulation of cytokinesis,GO:0032516-positive regulation of phosphoprotein phosphatase activity,GO:0043388-positive regulation of DNA binding,GO:0051343-positive regulation of cyclic-nucleotide phosphodiesterase activity,GO:0055117-regulation of cardiac muscle contraction,GO:0060316-positive regulation of ryanodine-sensitive calcium-release channel activity,                                                                                                                                                                                                                          |
| UTJ | DOWN | GAPDH    | glyceraldehyde-3-phosphate dehydrogenase(GAPDH)                                                | GO:0000226-microtubule cytoskeleton organization,GO:0006006-glucose metabolic process,GO:0006096-glycolytic process,GO:0006417-regulation of translation,GO:0035606-peptidyl-cysteine S-trans-nitrosylation,GO:0050821-protein stabilization,GO:0051402-neuron apoptotic process,GO:0055114-oxidation-reduction process,                                                                                                                                                                                                                                                                                                                                                                                                                                                                                                                                                                                                                               |
| UTJ | DOWN | VCAN     | versican(VCAN)                                                                                 | GO:0001501-skeletal system development,GO:0001649-osteoblast differentiation,GO:0007155-cell adhesion,GO:0007417-central nervous system development,                                                                                                                                                                                                                                                                                                                                                                                                                                                                                                                                                                                                                                                                                                                                                                                                   |
| UTJ | DOWN | FBN1     | fibillin 1(FBN1)                                                                               | GO:0001501-skeletal system development,GO:0006006-glucose metabolic process,GO:0007507-heart development,GO:0009653-anatomical structure morphogenesis,GO:0010737-protein kinase A signaling,GO:0034199-activation of protein kinase A activity,GO:0042593-glucose homeostasis,GO:0043010-camera-type eye development,GO:0048048-embryonic eye morphogenesis,GO:0048050-post-embryonic eye morphogenesis,GO:0090287-regulation of cellular response to growth factor stimulus,                                                                                                                                                                                                                                                                                                                                                                                                                                                                         |
| UTJ | DOWN | ACKR3    | atypical chemokine receptor 3(ACKR3)                                                           | GO:0001525-angiogenesis,GO:0001570-vasculogenesis,GO:0002230-positive regulation of defense response to virus by host,GO:0006935-chemotaxis,GO:0031623-receptor internalization,GO:0070374-positive regulation of ERK1 and ERK2 cascade,GO:0098792-xenophagy,GO:1902230-negative regulation of intrinsic apoptotic signaling pathway in response to DNA damage,                                                                                                                                                                                                                                                                                                                                                                                                                                                                                                                                                                                        |
| UTJ | DOWN | SRPX2    | sushi repeat containing protein, X-linked 2(SRPX2)                                             | GO:0001525-angiogenesis,GO:0016337-single organismal cell-cell adhesion,GO:0042325-regulation of phosphorylation,GO:0048870-cell motility,GO:0051965-positive regulation of synapse assembly,GO:0071625-vocalization behavior,GO:0090050-positive regulation of cell migration involved in sprouting angiogenesis,                                                                                                                                                                                                                                                                                                                                                                                                                                                                                                                                                                                                                                     |
| UTJ | DOWN | PLAUR    | plasminogen activator, urokinase receptor(PLAUR)                                               | GO:0001934-positive regulation of protein phosphorylation,GO:0030162-regulation of proteolysis,GO:0038195-urokinase plasminogen activator signaling pathway,GO:0043388-positive regulation of DNA binding,GO:0045742-positive regulation of epidermal growth factor receptor signaling pathway,GO:0090200-positive regulation of release of cytochrome c from mitochondria,GO:2001243-negative regulation of intrinsic apoptotic signaling pathway,GO:2001268-negative regulation of cysteine-type endopeptidase activity involved in apoptotic signaling pathway,                                                                                                                                                                                                                                                                                                                                                                                     |
| UTJ | DOWN | CREB3L2  | cAMP responsive element binding protein 3 like 2(CREB3L2)                                      | GO:0002062-chondrocyte differentiation,GO:0006888-ER to Golgi vesicle-mediated transport,GO:0030968-endoplasmic reticulum unfolded protein response,                                                                                                                                                                                                                                                                                                                                                                                                                                                                                                                                                                                                                                                                                                                                                                                                   |
| UTJ | DOWN | B4GALT1  | beta-1,4-galactosyltransferase 1(B4GALT1)                                                      | GO:0002064-epithelial cell development,GO:0002526-acute inflammatory response,GO:0005989-lactose biosynthetic process,GO:0006012-galactose metabolic process,GO:0006487-protein N-linked glycosylation,GO:0007155-cell adhesion,GO:0007339-binding of sperm to zona pellucida,GO:0007341-penetration of zona pellucida,GO:0008285-negative regulation of cell proliferation,GO:0030198-extracellular matrix organization,GO:0030879-mammary gland development,GO:0045136-development of secondary sexual characteristics,GO:0048754-branching morphogenesis of an epithelial tube,GO:0050900-leukocyte migration,GO:0051270-regulation of cellular component movement,GO:0060046-regulation of acrosome reaction,GO:0060054-positive regulation of epithelial cell proliferation involved in wound healing,GO:0060055-angiogenesis involved in wound healing,GO:0060058-positive regulation of apoptotic process involved in mammary gland involution, |
| UTJ | DOWN | CD63     | CD63 molecule(CD63)                                                                            | GO:0002092-positive regulation of receptor internalization,GO:0007155-cell adhesion,GO:0007160-cell-matrix adhesion,GO:0007166-cell surface receptor signaling pathway,GO:0016477-cell migration,GO:0034613-cellular protein localization,GO:0035646-endosome to melanosome transport,GO:0045807-positive regulation of endocytosis,GO:1900746-regulation of vascular endothelial growth factor signaling pathway,GO:2000080-regulation of rubidium ion transport,GO:2001046-positive regulation of integrin-mediated signaling pathway,                                                                                                                                                                                                                                                                                                                                                                                                               |
| UTJ | DOWN | PGK1     | phosphoglycerate kinase 1(PGK1)                                                                | GO:0006096-glycolytic process,GO:0016310-phosphorylation,                                                                                                                                                                                                                                                                                                                                                                                                                                                                                                                                                                                                                                                                                                                                                                                                                                                                                              |
| UTJ | DOWN | NPR2     | natriuretic peptide receptor B/guanylate cyclase B (atrionatriuretic peptide receptor B)(NPR2) | GO:0006182-cGMP biosynthetic process,GO:0007168-receptor guanylyl cyclase signaling pathway,GO:0035556-intracellular signal transduction,GO:0044702-single organism reproductive process,GO:0051447-negative regulation of meiotic cell cycle,GO:0060348-bone development,GO:0097011-cellular response to granulocyte macrophage colony-stimulating factor stimulus,GO:1900194-negative regulation of oocyte maturation,                                                                                                                                                                                                                                                                                                                                                                                                                                                                                                                               |
| UTJ | DOWN | CCNO     | cyclin O(CCNO)                                                                                 | GO:0006284-base-excision repair,GO:0007049-cell cycle,GO:0042384-cilium assembly,GO:0051301-cell division,GO:1903251-multi-ciliated epithelial cell differentiation,                                                                                                                                                                                                                                                                                                                                                                                                                                                                                                                                                                                                                                                                                                                                                                                   |
| UTJ | DOWN | MAGED1   | MAGE family member D1(MAGED1)                                                                  | GO:0006357-regulation of transcription from RNA polymerase II promoter,GO:0032922-circadian regulation of gene expression,GO:0042752-regulation of circadian rhythm,GO:0042981-regulation of apoptotic process,GO:0043406-positive regulation of MAP kinase activity,GO:0045892-negative regulation of transcription, DNA-templated,GO:0045893-positive regulation of transcription, DNA-templated,GO:0050680-negative regulation of epithelial cell proliferation,GO:0090190-positive regulation of branching involved in ureteric bud morphogenesis,GO:2001235-positive regulation of apoptotic signaling pathway,                                                                                                                                                                                                                                                                                                                                   |
| UTJ | DOWN | EEF1G    | eukaryotic translation elongation factor 1 gamma(EEF1G)                                        | GO:0006414-translational elongation,GO:0006749-glutathione metabolic process,GO:0009615-response to virus,                                                                                                                                                                                                                                                                                                                                                                                                                                                                                                                                                                                                                                                                                                                                                                                                                                             |
| UTJ | DOWN | CPXM1    | carboxypeptidase X, M14 family member 1(CPXM1)                                                 | GO:0006508-proteolysis,                                                                                                                                                                                                                                                                                                                                                                                                                                                                                                                                                                                                                                                                                                                                                                                                                                                                                                                                |
| UTJ | DOWN | ALDH18A1 | aldehyde dehydrogenase 18 family member A1(ALDH18A1)                                           | GO:0006536-glutamate metabolic process,GO:0006561-proline biosynthetic process,GO:0006592-ornithine biosynthetic process,GO:0019240-citrulline biosynthetic process,                                                                                                                                                                                                                                                                                                                                                                                                                                                                                                                                                                                                                                                                                                                                                                                   |
| UTJ | DOWN | SEC61G   | Sec61 translocon gamma subunit(SEC61G)                                                         | GO:0006605-protein targeting,                                                                                                                                                                                                                                                                                                                                                                                                                                                                                                                                                                                                                                                                                                                                                                                                                                                                                                                          |
| UTJ | DOWN | KDEL3    | KDEL endoplasmic reticulum protein retention receptor 3(KDEL3)                                 | GO:0006621-protein retention in ER lumen,GO:0015031-protein transport,                                                                                                                                                                                                                                                                                                                                                                                                                                                                                                                                                                                                                                                                                                                                                                                                                                                                                 |

|     |      |         |                                                                                 |                                                                                                                                                                                                                                                             |
|-----|------|---------|---------------------------------------------------------------------------------|-------------------------------------------------------------------------------------------------------------------------------------------------------------------------------------------------------------------------------------------------------------|
| UTJ | DOWN | SEC23A  | Sec23 homolog A, coat complex II component(SEC23A)                              | GO:0006886-intracellular protein transport,GO:0006888-ER to Golgi vesicle-mediated transport,                                                                                                                                                               |
| UTJ | DOWN | ATP8B2  | ATPase phospholipid transporting 8B2(ATP8B2)                                    | GO:0007030-Golgi organization,                                                                                                                                                                                                                              |
| UTJ | DOWN | SHAS2   | hyaluronan synthase 2(SHAS2)                                                    | GO:0007155-cell adhesion,GO:0030213-hyaluronan biosynthetic process,GO:0035810-positive regulation of urine volume,GO:0045226-extracellular polysaccharide biosynthetic process,GO:0070295-renal water absorption,GO:0085029-extracellular matrix assembly, |
| UTJ | DOWN | GNG2    | G protein subunit gamma 2(GNG2)                                                 | GO:0007186-G-protein coupled receptor signaling pathway,GO:0008283-cell proliferation,                                                                                                                                                                      |
| UTJ | DOWN | GDI2    | GDP dissociation inhibitor 2(GDI2)                                              | GO:0007264-small GTPase mediated signal transduction,GO:0015031-protein transport,GO:0043547-positive regulation of GTPase activity,GO:0055114-oxidation-reduction process,                                                                                 |
| UTJ | DOWN | RHOC    | ras homolog family member C(RHOC)                                               | GO:0007264-small GTPase mediated signal transduction,GO:0043297-apical junction assembly,GO:0044319-wound healing, spreading of cells,GO:1902766-skeletal muscle satellite cell migration,                                                                  |
| UTJ | DOWN | ABHD2   | abhydrolase domain containing 2(ABHD2)                                          | GO:0007340-acrosome reaction,GO:0009611-response to wounding,GO:0030336-negative regulation of cell migration,GO:0032570-response to progesterone,GO:0046464-acylglycerol catabolic process,GO:0048240-sperm capacitation,                                  |
| UTJ | DOWN | CD248   | CD248 molecule(CD248)                                                           | GO:0008284-positive regulation of cell proliferation,GO:0016477-cell migration,GO:0048535-lymph node development,GO:0060033-anatomical structure regression,GO:2000353-positive regulation of endothelial cell apoptotic process,                           |
| UTJ | DOWN | HMGCS1  | 3-hydroxy-3-methylglutaryl-CoA synthase 1(HMGCS1)                               | GO:0008299-isoprenoid biosynthetic process,                                                                                                                                                                                                                 |
| UTJ | DOWN | FBXL5   | F-box and leucine rich repeat protein 5(FBXL5)                                  | GO:0016567-protein ubiquitination,GO:0031146-5CF-dependent proteasomal ubiquitin-dependent protein catabolic process,GO:0055072-iron ion homeostasis,GO:1903364-positive regulation of cellular protein catabolic process,                                  |
| UTJ | DOWN | CYP51   | cytochrome P450, family 51, subfamily A, polypeptide 1(CYP51)                   | GO:0033488-cholesterol biosynthetic process via 24,25-dihydrolanosterol,GO:0055114-oxidation-reduction process,GO:0070988-demethylation,                                                                                                                    |
| UTJ | DOWN | FAM19A4 | family with sequence similarity 19 member A4, C-C motif chemokine like(FAM19A4) | GO:0042391-regulation of membrane potential,GO:0051930-regulation of sensory perception of pain,                                                                                                                                                            |

**Table 7.** List of biological pathways classified according to **molecular function** (DAVID database,  $P < 0.05$ ) of differentially-expressed genes (DEGs, ID and name), solely related to copulation, in pig uterine mucosae (endocervix (Cvx), endometrium (distal: D-Endom or proximal: P-Endom) and utero-tubal junction (UT)), up- or down-regulated.

| Tissue | Regulation | ID           | Gene Name                                                                                      | GOTERM_MF_DIRECT                                                                                                                                                                                                                                                                                                                                                                                      |
|--------|------------|--------------|------------------------------------------------------------------------------------------------|-------------------------------------------------------------------------------------------------------------------------------------------------------------------------------------------------------------------------------------------------------------------------------------------------------------------------------------------------------------------------------------------------------|
| Cvx    | UP         | TSHZ2        | teashirt zinc finger homeobox 2(TSHZ2)                                                         | GO:0001078-transcriptional repressor activity, RNA polymerase II core promoter proximal region sequence-specific binding,GO:0003677-DNA binding,GO:0003682-chromatin binding,GO:0046872-metal ion binding,                                                                                                                                                                                            |
| Cvx    | UP         | LOC100520903 | zinc finger protein 300-like(LOC100520903)                                                     | GO:0003676-nucleic acid binding,GO:0003700-transcription factor activity, sequence-specific DNA binding,GO:0046872-metal ion binding,                                                                                                                                                                                                                                                                 |
| Cvx    | UP         | DDX17        | DEAD-box helicase 17(DDX17)                                                                    | GO:0003676-nucleic acid binding,GO:0004004-ATP-dependent RNA helicase activity,GO:0005524-ATP binding,                                                                                                                                                                                                                                                                                                |
| Cvx    | UP         | ZBTB44       | zinc finger and BTB domain containing 44(ZBTB44)                                               | GO:0003676-nucleic acid binding,GO:0046872-metal ion binding,                                                                                                                                                                                                                                                                                                                                         |
| Cvx    | UP         | AKAP9        | A-kinase anchoring protein 9(AKAP9)                                                            | GO:0003677-DNA binding,                                                                                                                                                                                                                                                                                                                                                                               |
| Cvx    | UP         | NCOR2        | nuclear receptor corepressor 2(NCOR2)                                                          | GO:0003677-DNA binding,GO:0003714-transcription corepressor activity,GO:0008134-transcription factor binding,GO:0016922-ligand-dependent nuclear receptor binding,                                                                                                                                                                                                                                    |
| Cvx    | UP         | ENPP5        | ectonucleotide pyrophosphatase/phosphodiesterase 5 (putative)(ENPP5)                           | GO:0003824-catalytic activity,                                                                                                                                                                                                                                                                                                                                                                        |
| Cvx    | UP         | CPD          | carboxypeptidase D(CPD)                                                                        | GO:0004181-metalloprotease activity,GO:0004185-serine-type carboxypeptidase activity,GO:0008270-zinc ion binding,                                                                                                                                                                                                                                                                                     |
| Cvx    | UP         | LOC100153094 | glutathione S-transferase theta-1(LOC100153094)                                                | GO:0004364-glutathione transferase activity,                                                                                                                                                                                                                                                                                                                                                          |
| Cvx    | UP         | HDAC9        | histone deacetylase 9(HDAC9)                                                                   | GO:0004407-histone deacetylase activity,                                                                                                                                                                                                                                                                                                                                                              |
| Cvx    | UP         | FMO1         | flavin containing monooxygenase 1(FMO1)                                                        | GO:0004499-N,N-dimethylaniline monooxygenase activity,GO:0050660-flavin adenine dinucleotide binding,GO:0050661-NADP binding,                                                                                                                                                                                                                                                                         |
| Cvx    | UP         | PCBD1        | pterin-4 alpha-carbinolamine dehydratase 1(PCBD1)                                              | GO:0004505-phenylalanine 4-monooxygenase activity,GO:0008124-4-alpha-hydroxytetrahydrobiopterin dehydratase activity,                                                                                                                                                                                                                                                                                 |
| Cvx    | UP         | PRKCC        | protein kinase C theta(PRKCC)                                                                  | GO:0004679-protein serine/threonine kinase activity,GO:0004697-protein kinase C activity,GO:0005524-ATP binding,GO:0046872-metal ion binding,                                                                                                                                                                                                                                                         |
| Cvx    | UP         | IGF1R        | insulin like growth factor 1 receptor(IGF1R)                                                   | GO:0004714-transmembrane receptor protein tyrosine kinase activity,GO:0005520-insulin-like growth factor binding,GO:0005524-ATP binding,                                                                                                                                                                                                                                                              |
| Cvx    | UP         | MYLIP        | myosin regulatory light chain interacting protein(MYLIP)                                       | GO:0004842-ubiquitin-protein transferase activity,GO:0008270-zinc ion binding,GO:0061630-ubiquitin protein ligase activity,                                                                                                                                                                                                                                                                           |
| Cvx    | UP         | KCNQ4        | potassium voltage-gated channel subfamily Q member 4(KCNQ4)                                    | GO:0005251-delayed rectifier potassium channel activity,                                                                                                                                                                                                                                                                                                                                              |
| Cvx    | UP         | VAMP2        | vesicle associated membrane protein 2(VAMP2)                                                   | GO:0005484-SNAP receptor activity,GO:0005543-phospholipid binding,GO:0019905-syntaxin binding,                                                                                                                                                                                                                                                                                                        |
| Cvx    | UP         | THBS3        | thrombospondin 3(THBS3)                                                                        | GO:0005509-calcium ion binding,GO:0008201-heparin binding,                                                                                                                                                                                                                                                                                                                                            |
| Cvx    | UP         | PYGO1        | pygopus family PHD finger 1(PYGO1)                                                             | GO:0008270-zinc ion binding,                                                                                                                                                                                                                                                                                                                                                                          |
| Cvx    | UP         | RNF149       | ring finger protein 149(RNF149)                                                                | GO:0008270-zinc ion binding,GO:0061630-ubiquitin protein ligase activity,                                                                                                                                                                                                                                                                                                                             |
| Cvx    | UP         | DECR2        | 2,4-dienoyl-CoA reductase 2, peroxisomal(DECR2)                                                | GO:0008670-2,4-dienoyl-CoA reductase (NADPH) activity,GO:0019166-trans-2-enoyl-CoA reductase (NADPH) activity,                                                                                                                                                                                                                                                                                        |
| Cvx    | UP         | LOC102166095 | nuclear receptor coactivator 2-like(LOC102166095)                                              | GO:0016922-ligand-dependent nuclear receptor binding,GO:0003074-ligand-dependent nuclear receptor transcription coactivator activity,GO:0035257-nuclear hormone receptor binding,                                                                                                                                                                                                                     |
| Cvx    | UP         | CDKAL1       | CDK5 regulatory subunit associated protein 1 like 1(CDKAL1)                                    | GO:0035598-N6-threonylcarbamyladenosine methyltransferase activity,GO:0051539-4 iron, 4 sulfur cluster binding,                                                                                                                                                                                                                                                                                       |
| Cvx    | UP         | RETSAT       | retinol saturase(RETSAT)                                                                       | GO:0051786-all-trans-retinol 13,14-reductase activity,                                                                                                                                                                                                                                                                                                                                                |
| Cvx    | DOWN       | TDG          | thymine-DNA glycosylase(TDG)                                                                   | GO:0001104-RNA polymerase II transcription cofactor activity,GO:0004844-uracil DNA N-glycosylase activity,GO:0008263-pyrimidine-specific mismatch base pair DNA N-glycosylase activity,GO:0030983-mismatched DNA binding,GO:0043566-structure-specific DNA binding,                                                                                                                                   |
| Cvx    | DOWN       | NPY2R        | neuropeptide Y receptor Y2(NPY2R)                                                              | GO:0001601-peptide YY receptor activity,GO:0004930-G-protein coupled receptor activity,GO:0004983-neuropeptide Y receptor activity,                                                                                                                                                                                                                                                                   |
| Cvx    | DOWN       | THBS1        | thrombospondin 1(THBS1)                                                                        | GO:0001786-phosphatidylserine binding,GO:0005509-calcium ion binding,GO:0008201-heparin binding,GO:0030169-low-density lipoprotein particle binding,GO:0050840-extracellular matrix binding,                                                                                                                                                                                                          |
| Cvx    | DOWN       | ZBP1         | Z-DNA binding protein 1(ZBP1)                                                                  | GO:0003677-DNA binding,GO:0003723-RNA binding,GO:0003726-double-stranded RNA adenosine deaminase activity,                                                                                                                                                                                                                                                                                            |
| Cvx    | DOWN       | ABHD2        | abhydrolase domain containing 2(ABHD2)                                                         | GO:0003707-steroid hormone receptor activity,GO:0042562-hormone binding,GO:0047372-acylglycerol lipase activity,                                                                                                                                                                                                                                                                                      |
| Cvx    | DOWN       | SLC25A17     | solute carrier family 25 member 17(SLC25A17)                                                   | GO:0003735-structural constituent of ribosome,GO:0005347-ATP transmembrane transporter activity,GO:0015217-ADP transmembrane transporter activity,GO:0015228-coenzyme A transmembrane transporter activity,GO:0015230-FAD transmembrane transporter activity,GO:0044610-FMN transmembrane transporter activity,GO:0051724-NAD transporter activity,GO:0080122-AMP transmembrane transporter activity, |
| Cvx    | DOWN       | SLA-7        | MHC class I antigen 7(SLA-7)                                                                   | GO:0003823-antigen binding,                                                                                                                                                                                                                                                                                                                                                                           |
| Cvx    | DOWN       | RSAD2        | radical S-adenosyl methionine domain containing 2(RSAD2)                                       | GO:0003824-catalytic activity,GO:0043621-protein self-association,GO:0046872-metal ion binding,GO:0051539-4 iron, 4 sulfur cluster binding,                                                                                                                                                                                                                                                           |
| Cvx    | DOWN       | B4GALT1      | beta-1,4-galactosyltransferase 1(B4GALT1)                                                      | GO:0003831-beta-N-acetylglucosaminylglycopeptide beta-1,4-galactosyltransferase activity,GO:0003945-N-acetyllactosamine synthase activity,GO:0004461-lactose synthase activity,GO:0030145-manganese ion binding,                                                                                                                                                                                      |
| Cvx    | DOWN       | AGPAT2       | 1-acylglycerol-3-phosphate O-acyltransferase 2(AGPAT2)                                         | GO:0003841-1-acylglycerol-3-phosphate O-acyltransferase activity,                                                                                                                                                                                                                                                                                                                                     |
| Cvx    | DOWN       | MX1          | myxovirus (influenza virus) resistance 1, interferon-inducible protein p78 (mouse)(MX1)        | GO:0003924-GTPase activity,GO:0005525-GTP binding,GO:0008017-microtubule binding,                                                                                                                                                                                                                                                                                                                     |
| Cvx    | DOWN       | PAPSS2       | 3'-phosphoadenosine 5'-phosphosulfate synthase 2(PAPSS2)                                       | GO:0004020-adenylsulfate kinase activity,GO:0004781-sulfate adenylyltransferase (ATP) activity,GO:0005524-ATP binding,                                                                                                                                                                                                                                                                                |
| Cvx    | DOWN       | CMPK2        | cytidine/uridine monophosphate kinase 2(CMPK2)                                                 | GO:0004127-cytidylyltransferase activity,GO:0004550-nucleoside diphosphate kinase activity,GO:0004798-thymidylyltransferase activity,GO:0009041-uridylyltransferase activity,GO:003862-UMP kinase activity,                                                                                                                                                                                           |
| Cvx    | DOWN       | FDPS         | farnesyl diphosphate synthase(FDPS)                                                            | GO:0004161-dimethylallyltransferase activity,GO:0004337-geranyltransferase activity,GO:0044822-poly(A) RNA binding,                                                                                                                                                                                                                                                                                   |
| Cvx    | DOWN       | MMP3         | matrix metalloproteinase 3 (stromelysin 1, progelatinase)(MMP3)                                | GO:0004222-metalloendopeptidase activity,GO:0005509-calcium ion binding,GO:0008270-zinc ion binding,                                                                                                                                                                                                                                                                                                  |
| Cvx    | DOWN       | HTRA4        | HtrA serine peptidase 4(HTRA4)                                                                 | GO:0004252-serine-type endopeptidase activity,                                                                                                                                                                                                                                                                                                                                                        |
| Cvx    | DOWN       | PLAT         | plasminogen activator, tissue type(PLAT)                                                       | GO:0004252-serine-type endopeptidase activity,                                                                                                                                                                                                                                                                                                                                                        |
| Cvx    | DOWN       | PRSS23       | protease, serine 23(PRSS23)                                                                    | GO:0004252-serine-type endopeptidase activity,                                                                                                                                                                                                                                                                                                                                                        |
| Cvx    | DOWN       | NPR2         | natriuretic peptide receptor B/guanylate cyclase B (atrionatriuretic peptide receptor B)(NPR2) | GO:0004383-guanylate cyclase activity,GO:0004672-protein kinase activity,GO:0005524-ATP binding,GO:0016941-natriuretic peptide receptor activity,GO:0042562-hormone binding,                                                                                                                                                                                                                          |

|        |      |              |                                                                      |                                                                                                                                                                                                                                                                                                                                                                                                                                                                                                                                        |
|--------|------|--------------|----------------------------------------------------------------------|----------------------------------------------------------------------------------------------------------------------------------------------------------------------------------------------------------------------------------------------------------------------------------------------------------------------------------------------------------------------------------------------------------------------------------------------------------------------------------------------------------------------------------------|
| Cvx    | DOWN | HMGCR        | 3-hydroxy-3-methylglutaryl-CoA reductase(HMGCR)                      | GO:0004420-hydroxymethylglutaryl-CoA reductase (NADPH) activity,GO:0042282-hydroxymethylglutaryl-CoA reductase activity,GO:0050661-NADP binding,GO:0070402-NADPH binding,                                                                                                                                                                                                                                                                                                                                                              |
| Cvx    | DOWN | HMGCS1       | 3-hydroxy-3-methylglutaryl-CoA synthase 1(HMGCS1)                    | GO:0004421-hydroxymethylglutaryl-CoA synthase activity,                                                                                                                                                                                                                                                                                                                                                                                                                                                                                |
| Cvx    | DOWN | CYP51        | cytochrome P450, family 51, subfamily A, polypeptide 1(CYP51)        | GO:0004497-monoxygenase activity,GO:0005506-iron ion binding,GO:0008168-methyltransferase activity,GO:0008398-sterol 14-demethylase activity,GO:0016705-oxidoreductase activity, acting on paired donors, with incorporation or reduction of molecular oxygen,GO:0020037-heme binding,                                                                                                                                                                                                                                                 |
| Cvx    | DOWN | SQLE         | squalene epoxidase(SQLE)                                             | GO:0004506-squalene monoxygenase activity,GO:0050660-flavin adenine dinucleotide binding,                                                                                                                                                                                                                                                                                                                                                                                                                                              |
| Cvx    | DOWN | MAN2A1       | mannosidase alpha class 2A member 1(MAN2A1)                          | GO:0004559-alpha-mannosidase activity,GO:0008270-zinc ion binding,GO:0016799-hydrolase activity, hydrolyzing N-glycosyl compounds,GO:0030246-carbohydrate binding,                                                                                                                                                                                                                                                                                                                                                                     |
| Cvx    | DOWN | PANK3        | pantothenate kinase 3(PANK3)                                         | GO:0004594-pantothenate kinase activity,GO:0005524-ATP binding,                                                                                                                                                                                                                                                                                                                                                                                                                                                                        |
| Cvx    | DOWN | PGD          | phosphogluconate dehydrogenase(PGD)                                  | GO:0004616-phosphogluconate dehydrogenase (decarboxylating) activity,                                                                                                                                                                                                                                                                                                                                                                                                                                                                  |
| Cvx    | DOWN | KSR1         | kinase suppressor of ras 1(KSR1)                                     | GO:0004672-protein kinase activity,GO:0005524-ATP binding,GO:0046872-metal ion binding,                                                                                                                                                                                                                                                                                                                                                                                                                                                |
| Cvx    | DOWN | RIPK3        | receptor interacting serine/threonine kinase 3(RIPK3)                | GO:0004704-NF-kappaB-inducing kinase activity,GO:0005524-ATP binding,                                                                                                                                                                                                                                                                                                                                                                                                                                                                  |
| Cvx    | DOWN | MAPK6        | mitogen-activated protein kinase 6(MAPK6)                            | GO:0004707-MAP kinase activity,GO:0005524-ATP binding,                                                                                                                                                                                                                                                                                                                                                                                                                                                                                 |
| Cvx    | DOWN | UBASH3B      | ubiquitin associated and SH3 domain containing B(UBASH3B)            | GO:0004725-protein tyrosine phosphatase activity,                                                                                                                                                                                                                                                                                                                                                                                                                                                                                      |
| Cvx    | DOWN | SEPHS2       | selenophosphate synthetase 2(SEPHS2)                                 | GO:0004756-selenide, water dikinase activity,GO:0005524-ATP binding,                                                                                                                                                                                                                                                                                                                                                                                                                                                                   |
| Cvx    | DOWN | GARS         | glycyl-tRNA synthetase(GARS)                                         | GO:0004820-glycine-tRNA ligase activity,GO:0005524-ATP binding,                                                                                                                                                                                                                                                                                                                                                                                                                                                                        |
| Cvx    | DOWN | UBA7         | ubiquitin like modifier activating enzyme 7(UBA7)                    | GO:0004839-ubiquitin activating enzyme activity,GO:0004842-ubiquitin-protein transferase activity,GO:0005524-ATP binding,GO:0008641-small protein activating enzyme activity,GO:0019782-ISC15 activating enzyme activity,                                                                                                                                                                                                                                                                                                              |
| Cvx    | DOWN | LOC100518083 | E3 ISG15--protein ligase HERC5(LOC100518083)                         | GO:0004842-ubiquitin-protein transferase activity,GO:0016874-ligase activity,                                                                                                                                                                                                                                                                                                                                                                                                                                                          |
| Cvx    | DOWN | GJA1         | gap junction protein alpha 1(GJA1)                                   | GO:0004871-signal transducer activity,GO:0015075-ion transmembrane transporter activity,GO:0022857-transmembrane transporter activity,GO:1903763-gap junction channel activity involved in cell communication by electrical coupling,                                                                                                                                                                                                                                                                                                  |
| Cvx    | DOWN | LOC100154959 | olfactory receptor 4K3(LOC100154959)                                 | GO:0004888-transmembrane signaling receptor activity,GO:0004930-G-protein coupled receptor activity,GO:0004984-olfactory receptor activity,                                                                                                                                                                                                                                                                                                                                                                                            |
| Cvx    | DOWN | IL6ST        | interleukin 6 signal transducer(IL6ST)                               | GO:0004896-cytokine receptor activity,GO:0004915-interleukin-6 receptor activity,GO:0004921-interleukin-11 receptor activity,GO:0004923-leukemia inhibitory factor receptor activity,GO:0004924-oncostatin-M receptor activity,                                                                                                                                                                                                                                                                                                        |
| Cvx    | DOWN | VCAN         | versican(VCAN)                                                       | GO:0005201-extracellular matrix structural constituent,GO:0005509-calcium ion binding,GO:0005540-hyaluronic acid binding,                                                                                                                                                                                                                                                                                                                                                                                                              |
| Cvx    | DOWN | NPC1         | NPC intracellular cholesterol transporter 1(NPC1)                    | GO:0005319-lipid transporter activity,GO:0015485-cholesterol binding,                                                                                                                                                                                                                                                                                                                                                                                                                                                                  |
| Cvx    | DOWN | SLC30A7      | solute carrier family 30 member 7(SLC30A7)                           | GO:0005385-zinc ion transmembrane transporter activity,                                                                                                                                                                                                                                                                                                                                                                                                                                                                                |
| Cvx    | DOWN | PLOD2        | procollagen-lysine,2-oxoglutarate 5-dioxygenase 2(PLOD2)             | GO:0005506-iron ion binding,GO:0008475-procollagen-lysine 5-dioxygenase activity,GO:0031418-L-ascorbic acid binding,                                                                                                                                                                                                                                                                                                                                                                                                                   |
| Cvx    | DOWN | CDH7         | cadherin 7(CDH7)                                                     | GO:0005509-calcium ion binding,                                                                                                                                                                                                                                                                                                                                                                                                                                                                                                        |
| Cvx    | DOWN | ANXA5        | annexin A5(ANXA5)                                                    | GO:0005509-calcium ion binding,GO:0005544-calcium-dependent phospholipid binding,                                                                                                                                                                                                                                                                                                                                                                                                                                                      |
| Cvx    | DOWN | LRP8         | LDL receptor related protein 8(LRP8)                                 | GO:0005509-calcium ion binding,GO:0030229-very-low-density lipoprotein particle receptor activity,                                                                                                                                                                                                                                                                                                                                                                                                                                     |
| Cvx    | DOWN | LOC100152428 | multidrug resistance-associated protein 1-like(LOC100152428)         | GO:0005524-ATP binding,GO:0042626-ATPase activity, coupled to transmembrane movement of substances,                                                                                                                                                                                                                                                                                                                                                                                                                                    |
| Cvx    | DOWN | IFI44        | interferon induced protein 44(IFI44)                                 | GO:0005525-GTP binding,                                                                                                                                                                                                                                                                                                                                                                                                                                                                                                                |
| Cvx    | DOWN | RASD1        | ras related dexamethasone induced 1(RASD1)                           | GO:0005525-GTP binding,                                                                                                                                                                                                                                                                                                                                                                                                                                                                                                                |
| Cvx    | DOWN | MFS2A        | major facilitator superfamily domain containing 2A(MFS2A)            | GO:0005548-phospholipid transporter activity,GO:0015293-symporter activity,                                                                                                                                                                                                                                                                                                                                                                                                                                                            |
| Cvx    | DOWN | CXCL10       | C-X-C motif chemokine ligand 10(CXCL10)                              | GO:0008009-chemokine activity,GO:0008201-heparin binding,GO:0045236-CXCR chemokine receptor binding,                                                                                                                                                                                                                                                                                                                                                                                                                                   |
| Cvx    | DOWN | NT5C2        | 5'-nucleotidase, cytosolic II(NT5C2)                                 | GO:0008253-5'-nucleotidase activity,GO:0046872-metal ion binding,                                                                                                                                                                                                                                                                                                                                                                                                                                                                      |
| Cvx    | DOWN | CPXM1        | carboxypeptidase X, M14 family member 1(CPXM1)                       | GO:0008270-zinc ion binding,                                                                                                                                                                                                                                                                                                                                                                                                                                                                                                           |
| Cvx    | DOWN | ENPEP        | glutamyl aminopeptidase(ENPEP)                                       | GO:0008270-zinc ion binding,GO:0042277-peptide binding,GO:0070006-metaloaminopeptidase activity,                                                                                                                                                                                                                                                                                                                                                                                                                                       |
| Cvx    | DOWN | STARD4       | STAR related lipid transfer domain containing 4(STARD4)              | GO:0008289-lipid binding,GO:0015485-cholesterol binding,                                                                                                                                                                                                                                                                                                                                                                                                                                                                               |
| Cvx    | DOWN | B3GALT2      | beta-1,3-galactosyltransferase 2(B3GALT2)                            | GO:0008499-UDP-galactose:beta-N-acetylglucosamine beta-1,3-galactosyltransferase activity,                                                                                                                                                                                                                                                                                                                                                                                                                                             |
| Cvx    | DOWN | LOC100511841 | UDP-glucuronosyltransferase 1-10(LOC100511841)                       | GO:0016758-transferase activity, transferring hexosyl groups,                                                                                                                                                                                                                                                                                                                                                                                                                                                                          |
| Cvx    | DOWN | OLFML3       | olfactomedin like 3(OLFML3)                                          | GO:0019164-pyruvate synthase activity,                                                                                                                                                                                                                                                                                                                                                                                                                                                                                                 |
| Cvx    | DOWN | XPNPEP1      | X-prolyl aminopeptidase 1(XPNPEP1)                                   | GO:0030145-manganese ion binding,GO:0046872-metal ion binding,GO:0070006-metaloaminopeptidase activity,                                                                                                                                                                                                                                                                                                                                                                                                                                |
| Cvx    | DOWN | LOC100739844 | semaphorin-3A-like(LOC100739844)                                     | GO:0030215-semaphorin receptor binding,GO:0038191-neuropilin binding,GO:0045499-chemorepellent activity,                                                                                                                                                                                                                                                                                                                                                                                                                               |
| Cvx    | DOWN | PLAUR        | plasminogen activator, urokinase receptor(PLAUR)                     | GO:0030377-urokinase plasminogen activator receptor activity,                                                                                                                                                                                                                                                                                                                                                                                                                                                                          |
| Cvx    | DOWN | SNX31        | sorting nexin 31(SNX31)                                              | GO:0035091-phosphatidylinositol binding,                                                                                                                                                                                                                                                                                                                                                                                                                                                                                               |
| Cvx    | DOWN | S1PR3        | sphingosine-1-phosphate receptor 3(S1PR3)                            | GO:0038036-sphingosine-1-phosphate receptor activity,                                                                                                                                                                                                                                                                                                                                                                                                                                                                                  |
| Cvx    | DOWN | SGPP2        | sphingosine-1-phosphate phosphatase 2(SGPP2)                         | GO:0042392-sphingosine-1-phosphate phosphatase activity,                                                                                                                                                                                                                                                                                                                                                                                                                                                                               |
| Cvx    | DOWN | ATP6V0C      | ATPase H+ transporting V0 subunit c(ATP6V0C)                         | GO:0046961-proton-transporting ATPase activity, rotational mechanism,                                                                                                                                                                                                                                                                                                                                                                                                                                                                  |
| Cvx    | DOWN | GCNT3        | glucosaminyl (N-acetyl) transferase 3, mucin type(GCNT3)             | GO:0047225-acetylglucosaminyl-O-glycosyl-glycoprotein beta-1,6-N-acetylglucosaminyltransferase activity,                                                                                                                                                                                                                                                                                                                                                                                                                               |
| Cvx    | DOWN | CD47         | CD47 molecule(CD47)                                                  | GO:0070053-thrombospondin receptor activity,                                                                                                                                                                                                                                                                                                                                                                                                                                                                                           |
| Cvx    | DOWN | DCBLD1       | discoidin, CUB and LCCL domain containing 1(DCBLD1)                  | GO:0070492-oligosaccharide binding,                                                                                                                                                                                                                                                                                                                                                                                                                                                                                                    |
| DistUt | UP   | STX10        | syntaxin 10(STX10)                                                   | GO:0000149-SNARE binding,GO:0005484-SNAP receptor activity,                                                                                                                                                                                                                                                                                                                                                                                                                                                                            |
| DistUt | UP   | IDH3G        | isocitrate dehydrogenase 3 (NAD(+)) gamma(IDH3G)                     | GO:0002287-magnesium ion binding,GO:0004449-isocitrate dehydrogenase (NAD+) activity,GO:0051287-NAD binding,                                                                                                                                                                                                                                                                                                                                                                                                                           |
| DistUt | UP   | PRPSA1       | phosphoribosyl pyrophosphate synthetase associated protein 1(PRPSA1) | GO:0002287-magnesium ion binding,GO:0004749-ribose phosphate diphosphokinase activity,                                                                                                                                                                                                                                                                                                                                                                                                                                                 |
| DistUt | UP   | RARG         | retinoic acid receptor gamma(RARG)                                   | GO:0009977-RNA polymerase II regulatory region sequence-specific DNA binding,GO:0003707-steroid hormone receptor activity,GO:0003708-retinoic acid receptor activity,GO:0008270-zinc ion binding,GO:0009977-RNA polymerase II regulatory region sequence-specific DNA binding,GO:0008168-methyltransferase activity,GO:0008270-zinc ion binding,GO:0018024-histone-lysine N-methyltransferase activity,GO:0046974-histone methyltransferase activity (H3-K9 specific),GO:0046976-histone methyltransferase activity (H3-K27 specific), |

|        |    |              |                                                                        |                                                                                                                                                                                                                                                                                                               |
|--------|----|--------------|------------------------------------------------------------------------|---------------------------------------------------------------------------------------------------------------------------------------------------------------------------------------------------------------------------------------------------------------------------------------------------------------|
| DistUt | UP | RREB1        | ras responsive element binding protein 1(RREB1)                        | GO:000979-RNA polymerase II core promoter sequence-specific DNA binding,GO:0003676-nucleic acid binding,GO:0003700-transcription factor activity, sequence-specific DNA binding,GO:0043565-sequence-specific DNA binding,GO:0044212-transcription regulatory region DNA binding,GO:0046872-metal ion binding, |
| DistUt | UP | NFIX         | nuclear factor I X(NFIX)                                               | GO:0000981-RNA polymerase II transcription factor activity, sequence-specific DNA binding,GO:0003677-DNA binding,GO:0003700-transcription factor activity, sequence-specific DNA binding,                                                                                                                     |
| DistUt | UP | LOC100153966 | activator of 90 kDa heat shock protein ATPase homolog 1(LOC100153966)  | GO:0001671-ATPase activator activity,                                                                                                                                                                                                                                                                         |
| DistUt | UP | ANXA9        | annexin A9(ANXA9)                                                      | GO:0001786-phosphatidylserine binding,GO:0005509-calcium ion binding,GO:0005544-calcium-dependent phospholipid binding,GO:0015464-acetylcholine receptor activity,                                                                                                                                            |
| DistUt | UP | ZCCHC14      | zinc finger CCHC-type containing 14(ZCCHC14)                           | GO:0003676-nucleic acid binding,GO:0008270-zinc ion binding,                                                                                                                                                                                                                                                  |
| DistUt | UP | ZBTB7C       | zinc finger and BTB domain containing 7C(ZBTB7C)                       | GO:0003676-nucleic acid binding,GO:0046872-metal ion binding,                                                                                                                                                                                                                                                 |
| DistUt | UP | NCOR2        | nuclear receptor corepressor 2(NCOR2)                                  | GO:0003677-DNA binding,GO:0003714-transcription corepressor activity,GO:0008134-transcription factor binding,GO:0016922-ligand-dependent nuclear receptor binding,                                                                                                                                            |
| DistUt | UP | POLR1D       | RNA polymerase I subunit D(POLR1D)                                     | GO:0003677-DNA binding,GO:0003899-DNA-directed RNA polymerase activity,                                                                                                                                                                                                                                       |
| DistUt | UP | POLR1A       | RNA polymerase I subunit A(POLR1A)                                     | GO:0003677-DNA binding,GO:0003899-DNA-directed RNA polymerase activity,GO:0008270-zinc ion binding,                                                                                                                                                                                                           |
| DistUt | UP | TET3         | tet methylcytosine dioxygenase 3(TET3)                                 | GO:0003677-DNA binding,GO:0005506-iron ion binding,GO:0008270-zinc ion binding,GO:0070579-methylcytosine dioxygenase activity,                                                                                                                                                                                |
| DistUt | UP | SRCAP        | Smf2 related CREBBP activator protein(SRCAP)                           | GO:0003677-DNA binding,GO:0005524-ATP binding,                                                                                                                                                                                                                                                                |
| DistUt | UP | TBL1X        | transducin beta like 1X-linked(TBL1X)                                  | GO:0003682-chromatin binding,GO:0003714-transcription corepressor activity,GO:0044212-transcription regulatory region DNA binding,                                                                                                                                                                            |
| DistUt | UP | UBP1         | upstream binding protein 1 (LBP-1a)(UBP1)                              | GO:0003700-transcription factor activity, sequence-specific DNA binding,GO:0043565-sequence-specific DNA binding,                                                                                                                                                                                             |
| DistUt | UP | KCTD1        | potassium channel tetramerization domain containing 1(KCTD1)           | GO:0003714-transcription corepressor activity,                                                                                                                                                                                                                                                                |
| DistUt | UP | HSP90A1      | heat shock protein 90 alpha family class B member 1(HSP90A1)           | GO:0003725-double-stranded RNA binding,GO:0005524-ATP binding,GO:0019887-protein kinase regulator activity,GO:0044822-poly(A) RNA binding,                                                                                                                                                                    |
| DistUt | UP | CBX8         | chromobox 8(CBX8)                                                      | GO:0003727-single-stranded RNA binding,GO:0097027-ubiquitin-protein transferase activator activity,                                                                                                                                                                                                           |
| DistUt | UP | CAP2         | CAP, adenylate cyclase-associated protein, 2 (yeast)(CAP2)             | GO:0003779-actin binding,GO:0008179-adenylate cyclase binding,                                                                                                                                                                                                                                                |
| DistUt | UP | LOC100624445 | gamma-glutamylcyclotransferase-like(LOC100624445)                      | GO:0003839-gamma-glutamylcyclotransferase activity,                                                                                                                                                                                                                                                           |
| DistUt | UP | DGAT1        | diacylglycerol O-acyltransferase 1(DGAT1)                              | GO:0003846-2-acylglycerol O-acyltransferase activity,GO:0004144-diacylglycerol O-acyltransferase activity,GO:0008374-O-acyltransferase activity,GO:0016746-transferase activity, transferring acyl groups,                                                                                                    |
| DistUt | UP | HADH         | hydroxyacyl-CoA dehydrogenase(HADH)                                    | GO:0003857-3-hydroxyacyl-CoA dehydrogenase activity,GO:0070403-NAD+ binding,                                                                                                                                                                                                                                  |
| DistUt | UP | GMPR         | guanosine monophosphate reductase(GMPR)                                | GO:0003920-GMP reductase activity,GO:0046872-metal ion binding,                                                                                                                                                                                                                                               |
| DistUt | UP | DHX32        | DEAH-box helicase 32 (putative)(DHX32)                                 | GO:0004004-ATP-dependent RNA helicase activity,GO:0004386-helicase activity,GO:0044822-poly(A) RNA binding,                                                                                                                                                                                                   |
| DistUt | UP | ALDH6A1      | aldehyde dehydrogenase 6 family member A1(ALDH6A1)                     | GO:0004029-aldehyde dehydrogenase (NAD) activity,GO:0004491-methylmalonate-semialdehyde dehydrogenase (acylating) activity,GO:0018478-malonate-semialdehyde dehydrogenase (acylating) activity,GO:0044822-poly(A) RNA binding,                                                                                |
| DistUt | UP | ALDH2        | aldehyde dehydrogenase 2 family (mitochondrial)(ALDH2)                 | GO:0004029-aldehyde dehydrogenase (NAD) activity,GO:0016620-oxidoreductase activity, acting on the aldehyde or oxo group of donors, NAD or NADP as acceptor,                                                                                                                                                  |
| DistUt | UP | CHKA         | choline kinase alpha(CHKA)                                             | GO:0004103-choline kinase activity,GO:0004104-cholinesterase activity,GO:0004305-ethanolamine kinase activity,GO:0008144-drug binding,                                                                                                                                                                        |
| DistUt | UP | DGUOK        | deoxyguanosine kinase(DGUOK)                                           | GO:0004138-deoxyguanosine kinase activity,GO:0005524-ATP binding,                                                                                                                                                                                                                                             |
| DistUt | UP | CAPN5        | calpain 5(CAPN5)                                                       | GO:0004198-calcium-dependent cysteine-type endopeptidase activity,                                                                                                                                                                                                                                            |
| DistUt | UP | CAPN15       | calpain 15(CAPN15)                                                     | GO:0004198-calcium-dependent cysteine-type endopeptidase activity,GO:0008270-zinc ion binding,                                                                                                                                                                                                                |
| DistUt | UP | FAH          | fumarylacetoacetate hydrolase(FAH)                                     | GO:0004334-fumarylacetoacetase activity,                                                                                                                                                                                                                                                                      |
| DistUt | UP | GSTK1        | glutathione S-transferase kappa 1(GSTK1)                               | GO:0004364-glutathione transferase activity,GO:0004602-glutathione peroxidase activity,GO:0015035-protein disulfide oxidoreductase activity,                                                                                                                                                                  |
| DistUt | UP | FMO2         | flavin containing monooxygenase 2(FMO2)                                | GO:0004497-monoxygenase activity,GO:0004499-N,N-dimethylaniline monooxygenase activity,GO:0050660-flavin adenine dinucleotide binding,GO:0050661-NADP binding,                                                                                                                                                |
| DistUt | UP | PCBD1        | pterin-4 alpha-carbinolamine dehydratase 1(PCBD1)                      | GO:0004505-phenylalanine 4-monoxygenase activity,GO:0008124-4-alpha-hydroxytetrahydrobiopterin dehydratase activity,                                                                                                                                                                                          |
| DistUt | UP | CNOT2        | CCR4-NOT transcription complex subunit 2(CNOT2)                        | GO:0004535-poly(A)-specific ribonuclease activity,                                                                                                                                                                                                                                                            |
| DistUt | UP | CNOT1        | CCR4-NOT transcription complex subunit 1(CNOT1)                        | GO:0004535-poly(A)-specific ribonuclease activity,GO:0032947-protein complex scaffold,GO:0044822-poly(A) RNA binding,                                                                                                                                                                                         |
| DistUt | UP | PLD2         | phospholipase D2(PLD2)                                                 | GO:0004630-phospholipase D activity,                                                                                                                                                                                                                                                                          |
| DistUt | UP | MAP4K2       | mitogen-activated protein kinase kinase kinase kinase 2(MAP4K2)        | GO:0004702-receptor signaling protein serine/threonine kinase activity,GO:0005524-ATP binding,GO:0008349-MAP kinase kinase kinase activity,                                                                                                                                                                   |
| DistUt | UP | CSF1R        | colony stimulating factor 1 receptor(CSF1R)                            | GO:0004714-transmembrane receptor protein tyrosine kinase activity,GO:0005011-macrophage colony-stimulating factor receptor activity,GO:0005524-ATP binding,                                                                                                                                                  |
| DistUt | UP | NTRK3        | neurotrophic receptor tyrosine kinase 3(NTRK3)                         | GO:0004714-transmembrane receptor protein tyrosine kinase activity,GO:0005030-neurotrophin receptor activity,GO:0005524-ATP binding,                                                                                                                                                                          |
| DistUt | UP | CDC25B       | cell division cycle 25B(CDC25B)                                        | GO:0004725-protein tyrosine phosphatase activity,                                                                                                                                                                                                                                                             |
| DistUt | UP | CDC25C       | cell division cycle 25C(CDC25C)                                        | GO:0004725-protein tyrosine phosphatase activity,GO:0019901-protein kinase binding,GO:0050699-WW domain binding,                                                                                                                                                                                              |
| DistUt | UP | MTMR7        | myotubularin related protein 7(MTMR7)                                  | GO:0004725-protein tyrosine phosphatase activity,GO:0052866-phosphatidylinositol phosphate phosphatase activity,                                                                                                                                                                                              |
| DistUt | UP | DHRS3        | dehydrogenase/reductase 3(DHRS3)                                       | GO:0004745-retinol dehydrogenase activity,                                                                                                                                                                                                                                                                    |
| DistUt | UP | SPR          | sepiapterin reductase (7,8-dihydrobiopterin:NADP+ oxidoreductase)(SPR) | GO:0004757-sepiapterin reductase activity,                                                                                                                                                                                                                                                                    |
| DistUt | UP | RNF167       | ring finger protein 167(RNF167)                                        | GO:0004842-ubiquitin-protein transferase activity,GO:0008270-zinc ion binding,                                                                                                                                                                                                                                |
| DistUt | UP | TRIM9        | tripartite motif containing 9(TRIM9)                                   | GO:0004842-ubiquitin-protein transferase activity,GO:0008270-zinc ion binding,                                                                                                                                                                                                                                |
| DistUt | UP | USP2         | ubiquitin specific peptidase 2(USP2)                                   | GO:0004843-thiol-dependent ubiquitin-specific protease activity,GO:0036459-thiol-dependent ubiquitinyl hydrolase activity,                                                                                                                                                                                    |
| DistUt | UP | GABRB2       | gamma-aminobutyric acid type A receptor beta2 subunit(GABRB2)          | GO:0004890-GABA-A receptor activity,GO:0005230-extracellular ligand-gated ion channel activity,                                                                                                                                                                                                               |
| DistUt | UP | IL1RAPL2     | interleukin 1 receptor accessory protein like 2(IL1RAPL2)              | GO:0004910-interleukin-1, Type II, blocking receptor activity,                                                                                                                                                                                                                                                |
| DistUt | UP | LOC100152489 | olfactory receptor 13C8(LOC100152489)                                  | GO:0004930-G-protein coupled receptor activity,GO:0004984-olfactory receptor activity,                                                                                                                                                                                                                        |

|        |      |              |                                                                                           |                                                                                                                                                                                                                                                                                                                                                                                                                               |
|--------|------|--------------|-------------------------------------------------------------------------------------------|-------------------------------------------------------------------------------------------------------------------------------------------------------------------------------------------------------------------------------------------------------------------------------------------------------------------------------------------------------------------------------------------------------------------------------|
| DistUt | UP   | ADRA2A       | adrenoceptor alpha 2A(ADRA2A)                                                             | GO:0004938-alpha2-adrenergic receptor activity,GO:0019901-protein kinase binding,GO:0031692-alpha-1B adrenergic receptor binding,GO:0031696-alpha-2C adrenergic receptor binding,GO:0031996-thioesterase binding,GO:0032795-heterotrimeric G-protein binding,GO:0042803-protein homodimerization activity,GO:0046982-protein heterodimerization activity,GO:0051379-epinephrine binding,GO:0051380-norepinephrine binding,    |
| DistUt | UP   | GARNL3       | GTPase activating Rap/RanGAP domain like 3(GARNL3)                                        | GO:0005096-GTPase activator activity,                                                                                                                                                                                                                                                                                                                                                                                         |
| DistUt | UP   | WNT7A        | Wnt family member 7A(WNT7A)                                                               | GO:0005109-frizzled binding,                                                                                                                                                                                                                                                                                                                                                                                                  |
| DistUt | UP   | AQP9         | aquaporin 9(AQP9)                                                                         | GO:0005215-transporter activity,GO:0005345-purine nucleobase transmembrane transporter activity,GO:0005350-pyrimidine nucleobase transmembrane transporter activity,GO:0015204-urea transmembrane transporter activity,GO:0015250-water channel activity,GO:0015254-glycerol channel activity,GO:0015265-urea channel activity,                                                                                               |
| DistUt | UP   | STARD10      | STAR related lipid transfer domain containing 10(STARD10)                                 | GO:0005215-transporter activity,GO:0008289-lipid binding,                                                                                                                                                                                                                                                                                                                                                                     |
| DistUt | UP   | ATP2C2       | ATPase secretory pathway Ca2+ transporting 2(ATP2C2)                                      | GO:0005388-calcium-transporting ATPase activity,GO:0005524-ATP binding,GO:0015410-manganese-transporting ATPase activity,GO:0046872-metal ion binding,                                                                                                                                                                                                                                                                        |
| DistUt | UP   | ATP2A3       | ATPase sarcoplasmic/endoplasmic reticulum Ca2+ transporting 3(ATP2A3)                     | GO:0005388-calcium-transporting ATPase activity,GO:0005524-ATP binding,GO:0046872-metal ion binding,                                                                                                                                                                                                                                                                                                                          |
| DistUt | UP   | SLC15A1      | solute carrier family 15 member 1(SLC15A1)                                                | GO:0005427-proton-dependent oligopeptide secondary active transmembrane transporter activity,GO:0015198-oligopeptide transporter activity,                                                                                                                                                                                                                                                                                    |
| DistUt | UP   | ABCA9        | ATP binding cassette subfamily A member 9(ABCA9)                                          | GO:0005524-ATP binding,GO:0042626-ATPase activity, coupled to transmembrane movement of substances,                                                                                                                                                                                                                                                                                                                           |
| DistUt | UP   | TRAP1        | TNF receptor associated protein 1(TRAP1)                                                  | GO:0005524-ATP binding,GO:0044822-poly(A) RNA binding,                                                                                                                                                                                                                                                                                                                                                                        |
| DistUt | UP   | HSPE1        | heat shock protein family E (Hsp10) member 1(HSPE1)                                       | GO:0005524-ATP binding,GO:0046872-metal ion binding,GO:0051082-unfolded protein binding,GO:0051087-chaperone binding,                                                                                                                                                                                                                                                                                                         |
| DistUt | UP   | CNMT         | glycine N-methyltransferase(CNMT)                                                         | GO:0005542-folic acid binding,GO:0016594-glycine binding,GO:0017174-glycine N-methyltransferase activity,                                                                                                                                                                                                                                                                                                                     |
| DistUt | UP   | TDP1         | tyrosyl-DNA phosphodiesterase 1(TDP1)                                                     | GO:0008081-phosphoric diester hydrolase activity,                                                                                                                                                                                                                                                                                                                                                                             |
| DistUt | UP   | VEGFB        | vascular endothelial growth factor B(VEGFB)                                               | GO:0008083-growth factor activity,GO:0043183-vascular endothelial growth factor receptor 1 binding,                                                                                                                                                                                                                                                                                                                           |
| DistUt | UP   | RNF4         | ring finger protein 4(RNF4)                                                               | GO:0008134-transcription factor binding,GO:0008270-zinc ion binding,GO:0032184-SUMO polymer binding,GO:0061630-ubiquitin protein ligase activity,                                                                                                                                                                                                                                                                             |
| DistUt | UP   | NDUFA10      | NADH:ubiquinone oxidoreductase subunit A10(NDUFA10)                                       | GO:0008137-NADH dehydrogenase (ubiquinone) activity,                                                                                                                                                                                                                                                                                                                                                                          |
| DistUt | UP   | NDUFV1       | NADH:ubiquinone oxidoreductase core subunit V1(NDUFV1)                                    | GO:0008137-NADH dehydrogenase (ubiquinone) activity,GO:0010181-FMN binding,GO:0051287-NAD binding,GO:0051539-4 iron, 4 sulfur cluster binding,                                                                                                                                                                                                                                                                                |
| DistUt | UP   | ZSWIM1       | zinc finger SWIM-type containing 1(ZSWIM1)                                                | GO:0008270-zinc ion binding,                                                                                                                                                                                                                                                                                                                                                                                                  |
| DistUt | UP   | RUFY1        | RUN and FYVE domain containing 1(RUFY1)                                                   | GO:0008270-zinc ion binding,GO:0008565-protein transporter activity,                                                                                                                                                                                                                                                                                                                                                          |
| DistUt | UP   | KRT19        | keratin 19(KRT19)                                                                         | GO:0008307-structural constituent of muscle,                                                                                                                                                                                                                                                                                                                                                                                  |
| DistUt | UP   | CACNB2       | calcium voltage-gated channel auxiliary subunit beta 2(CACNB2)                            | GO:0008331-high voltage-gated calcium channel activity,GO:0086056-voltage-gated calcium channel activity involved in AV node cell action potential,                                                                                                                                                                                                                                                                           |
| DistUt | UP   | POFU1T       | protein O-fucosyltransferase 1(POFU1)                                                     | GO:0008417-fucosyltransferase activity,GO:0046922-peptide-O-fucosyltransferase activity,                                                                                                                                                                                                                                                                                                                                      |
| DistUt | UP   | NUDT14       | nudix hydrolase 14(NUDT14)                                                                | GO:0008768-UDP-sugar diphosphatase activity,GO:0046872-metal ion binding,GO:0047631-ADP-ribose diphosphatase activity,                                                                                                                                                                                                                                                                                                        |
| DistUt | UP   | SLC7A7       | solute carrier family 7 member 7(SLC7A7)                                                  | GO:0015171-amino acid transmembrane transporter activity,GO:0015174-basic amino acid transmembrane transporter activity,GO:0015179-L-amino acid transmembrane transporter activity,GO:0015297-antiporter activity,                                                                                                                                                                                                            |
| DistUt | UP   | SLC44A1      | solute carrier family 44 member 1(SLC44A1)                                                | GO:0015220-choline transmembrane transporter activity,                                                                                                                                                                                                                                                                                                                                                                        |
| DistUt | UP   | KCNMB4       | potassium large conductance calcium-activated channel, subfamily M, beta member 4(KCNMB4) | GO:0015269-calcium-activated potassium channel activity,                                                                                                                                                                                                                                                                                                                                                                      |
| DistUt | UP   | FCGR1A       | Fc fragment of IgG, high affinity Ia, receptor (CD64)(FCGR1A)                             | GO:0019770-IgG receptor activity,                                                                                                                                                                                                                                                                                                                                                                                             |
| DistUt | UP   | LOC100521617 | myelin and lymphocyte protein(LOC100521617)                                               | GO:0019911-structural constituent of myelin sheath,                                                                                                                                                                                                                                                                                                                                                                           |
| DistUt | UP   | CUL4A        | cullin 4A(CUL4A)                                                                          | GO:0031625-ubiquitin protein ligase binding,                                                                                                                                                                                                                                                                                                                                                                                  |
| DistUt | UP   | KBTBD4       | kelch repeat and BTB domain containing 4(KBTBD4)                                          | GO:0031625-ubiquitin protein ligase binding,                                                                                                                                                                                                                                                                                                                                                                                  |
| DistUt | UP   | NIPSNAP1     | nipsnap homolog 1 (C. elegans)(NIPSNAP1)                                                  | GO:0042165-neurotransmitter binding,                                                                                                                                                                                                                                                                                                                                                                                          |
| DistUt | UP   | PDF          | peptide deformylase (mitochondrial)(PDF)                                                  | GO:0042586-peptide deformylase activity,GO:0046872-metal ion binding,                                                                                                                                                                                                                                                                                                                                                         |
| DistUt | UP   | TENM2        | tenascin transmembrane protein 2(TENM2)                                                   | GO:0042803-protein homodimerization activity,GO:0046982-protein heterodimerization activity,GO:0050839-cell adhesion molecule binding,                                                                                                                                                                                                                                                                                        |
| DistUt | UP   | OLFML2A      | olfactomedin like 2A(OLFML2A)                                                             | GO:0042803-protein homodimerization activity,GO:0050840-extracellular matrix binding,                                                                                                                                                                                                                                                                                                                                         |
| DistUt | UP   | CCDC124      | coiled-coil domain containing 124(CCDC124)                                                | GO:0044822-poly(A) RNA binding,                                                                                                                                                                                                                                                                                                                                                                                               |
| DistUt | UP   | KCTD12       | potassium channel tetramerization domain containing 12(KCTD12)                            | GO:0044822-poly(A) RNA binding,                                                                                                                                                                                                                                                                                                                                                                                               |
| DistUt | UP   | PRR3         | proline rich 3(PRR3)                                                                      | GO:0046872-metal ion binding,                                                                                                                                                                                                                                                                                                                                                                                                 |
| DistUt | UP   | ATP5E        | ATP synthase, H+ transporting, mitochondrial F1 complex, epsilon subunit(ATP5E)           | GO:0046933-proton-transporting ATP synthase activity, rotational mechanism,GO:0046961-proton-transporting ATPase activity, rotational mechanism,                                                                                                                                                                                                                                                                              |
| DistUt | UP   | LOC100513474 | platelet-activating factor acetyltransferase gamma(LOC100513474)                          | GO:0047179-platelet-activating factor acetyltransferase activity,                                                                                                                                                                                                                                                                                                                                                             |
| DistUt | DOWN | GUCY1B3      | guanylate cyclase 1, soluble, beta 3(GUCY1B3)                                             | GO:0001166-nucleotide binding,GO:0004383-guanylate cyclase activity,GO:0020037-heme binding,                                                                                                                                                                                                                                                                                                                                  |
| DistUt | DOWN | RCAN2        | regulator of calcineurin 2(RCAN2)                                                         | GO:0001166-nucleotide binding,GO:0008597-calcium-dependent protein serine/threonine phosphatase regulator activity,                                                                                                                                                                                                                                                                                                           |
| DistUt | DOWN | ATP8B2       | ATPase phospholipid transporting 8B2(ATP8B2)                                              | GO:0000287-magnesium ion binding,GO:0004012-phospholipid-translocating ATPase activity,GO:0005524-ATP binding,                                                                                                                                                                                                                                                                                                                |
| DistUt | DOWN | RPS6KA6      | ribosomal protein S6 kinase A6(RPS6KA6)                                                   | GO:0000287-magnesium ion binding,GO:0004672-protein kinase activity,GO:0004674-protein serine/threonine kinase activity,GO:0005524-ATP binding,                                                                                                                                                                                                                                                                               |
| DistUt | DOWN | FOXP2        | forkhead box P2(FOXP2)                                                                    | GO:0000978-RNA polymerase II core promoter proximal region sequence-specific DNA binding,GO:0000981-RNA polymerase II transcription factor activity, sequence-specific DNA binding,GO:0001078-transcriptional repressor activity, RNA polymerase II core promoter proximal region sequence-specific binding,GO:0003700-transcription factor activity, sequence-specific DNA binding,GO:0043565-sequence-specific DNA binding, |
| DistUt | DOWN | LOC100736857 | microphthalmia-associated transcription factor-like(LOC100736857)                         | GO:0000978-RNA polymerase II core promoter proximal region sequence-specific DNA binding,GO:0001077-transcriptional activator activity, RNA polymerase II core promoter proximal region sequence-specific binding,                                                                                                                                                                                                            |
| DistUt | DOWN | CREB3L2      | cAMP responsive element binding protein 3 like 2(CREB3L2)                                 | GO:0000978-RNA polymerase II core promoter proximal region sequence-specific DNA binding,GO:0001077-transcriptional activator activity, RNA polymerase II core promoter proximal region sequence-specific binding,GO:0035497-cAMP response element binding,                                                                                                                                                                   |



|        |      |              |                                                                                                 |                                                                                                                                                                                                                                                                                                                                                                                                                                                                                                                                        |
|--------|------|--------------|-------------------------------------------------------------------------------------------------|----------------------------------------------------------------------------------------------------------------------------------------------------------------------------------------------------------------------------------------------------------------------------------------------------------------------------------------------------------------------------------------------------------------------------------------------------------------------------------------------------------------------------------------|
| DistUt | DOWN | TCF7L2       | transcription factor 7 like 2(TCF7L2)                                                           | GO:000978-RNA polymerase II core promoter proximal region sequence-specific DNA binding,GO:0003700-transcription factor activity, sequence-specific DNA binding,GO:0008013-beta-catenin binding,GO:0043565-sequence-specific DNA binding,GO:0044212-transcription regulatory region DNA binding,                                                                                                                                                                                                                                       |
| DistUt | DOWN | HIF1A        | hypoxia inducible factor 1, alpha subunit (basic helix-loop-helix transcription factor)(HIF1A)  | GO:000981-RNA polymerase II transcription factor activity, sequence-specific DNA binding,GO:0001076-transcription factor activity, RNA polymerase II transcription factor binding,GO:0001077-transcriptional activator activity, RNA polymerase II core promoter proximal region sequence-specific DNA binding,GO:0003700-transcription factor activity, sequence-specific DNA binding,GO:0003705-transcription factor activity, RNA polymerase II distal enhancer sequence-specific binding,GO:0043565-sequence-specific DNA binding, |
| DistUt | DOWN | ZNF516       | zinc finger protein 516(ZNF516)                                                                 | GO:000987-core promoter proximal region sequence-specific DNA binding,GO:0003700-transcription factor activity, sequence-specific DNA binding,GO:003613-activating transcription factor binding,GO:0043565-sequence-specific DNA binding,GO:0044212-transcription regulatory region DNA binding,                                                                                                                                                                                                                                       |
| DistUt | DOWN | TDG          | thymine-DNA glycosylase(TDG)                                                                    | GO:0001104-RNA polymerase II transcription cofactor activity,GO:0004844-uracil DNA N-glycosylase activity,GO:0008263-pyrimidine-specific mismatch base pair DNA N-glycosylase activity,GO:0030983-mismatched DNA binding,GO:0043566-structure-specific DNA binding,                                                                                                                                                                                                                                                                    |
| DistUt | DOWN | AGTR1        | angiotensin II receptor type 1(AGTR1)                                                           | GO:0001596-angiotensin type I receptor activity,GO:0004945-angiotensin type II receptor activity,GO:0031711-bradykinin receptor binding,GO:0046982-protein heterodimerization activity,                                                                                                                                                                                                                                                                                                                                                |
| DistUt | DOWN | ERLEC1       | endoplasmic reticulum lectin 1(ERLEC1)                                                          | GO:0001948-glycoprotein binding,                                                                                                                                                                                                                                                                                                                                                                                                                                                                                                       |
| DistUt | DOWN | AFF2         | Af4/FMR2 family member 2(AFF2)                                                                  | GO:002151-G-quadruplex RNA binding,                                                                                                                                                                                                                                                                                                                                                                                                                                                                                                    |
| DistUt | DOWN | AGR2         | anterior gradient 2, protein disulphide isomerase family member(AGR2)                           | GO:0002162-dystroglycan binding,                                                                                                                                                                                                                                                                                                                                                                                                                                                                                                       |
| DistUt | DOWN | PRDM1        | PR/SET domain 1(PRDM1)                                                                          | GO:0003676-nucleic acid binding,GO:0003700-transcription factor activity, sequence-specific DNA binding,GO:0046872-metal ion binding,                                                                                                                                                                                                                                                                                                                                                                                                  |
| DistUt | DOWN | ZBTB38       | zinc finger and BTB domain containing 38(ZBTB38)                                                | GO:0003676-nucleic acid binding,GO:0046872-metal ion binding,                                                                                                                                                                                                                                                                                                                                                                                                                                                                          |
| DistUt | DOWN | ZFAND5       | zinc finger AN1-type containing 5(ZFAND5)                                                       | GO:0003677-DNA binding,GO:0008270-zinc ion binding,                                                                                                                                                                                                                                                                                                                                                                                                                                                                                    |
| DistUt | DOWN | SVEP1        | sushi, von Willebrand factor type A, EGF and pentraxin domain containing 1(SVEP1)               | GO:0003682-chromatin binding,GO:0005509-calcium ion binding,                                                                                                                                                                                                                                                                                                                                                                                                                                                                           |
| DistUt | DOWN | ABHD2        | abhydrolase domain containing 2(ABHD2)                                                          | GO:0003707-steroid hormone receptor activity,GO:0042562-hormone binding,GO:0047372-acylglycerol lipase activity,                                                                                                                                                                                                                                                                                                                                                                                                                       |
| DistUt | DOWN | MAGED1       | MAGE family member D1(MAGED1)                                                                   | GO:0003713-transcription coactivator activity,                                                                                                                                                                                                                                                                                                                                                                                                                                                                                         |
| DistUt | DOWN | HSBP1L1      | heat shock factor binding protein 1 like 1(HSBP1L1)                                             | GO:0003714-transcription corepressor activity,                                                                                                                                                                                                                                                                                                                                                                                                                                                                                         |
| DistUt | DOWN | FKBP7        | FK506 binding protein 7(FKBP7)                                                                  | GO:0003755-peptidyl-prolyl cis-trans isomerase activity,GO:0005509-calcium ion binding,GO:0005528-FK506 binding,                                                                                                                                                                                                                                                                                                                                                                                                                       |
| DistUt | DOWN | ERO1A        | endoplasmic reticulum oxidoreductase 1 alpha(ERO1A)                                             | GO:0003756-protein disulfide isomerase activity,GO:0015035-protein disulfide oxidoreductase activity,GO:0016671-oxidoreductase activity, acting on a sulfur group of donors, disulfide as acceptor,                                                                                                                                                                                                                                                                                                                                    |
| DistUt | DOWN | PDIA3        | protein disulfide isomerase family A member 3(PDIA3)                                            | GO:0003756-protein disulfide isomerase activity,GO:0044822-poly(A) RNA binding,                                                                                                                                                                                                                                                                                                                                                                                                                                                        |
| DistUt | DOWN | TGM2         | transglutaminase 2(TGM2)                                                                        | GO:0003810-protein-glutamine gamma-glutamyltransferase activity,GO:0046872-metal ion binding,                                                                                                                                                                                                                                                                                                                                                                                                                                          |
| DistUt | DOWN | B4GALT1      | beta-1,4-galactosyltransferase 1(B4GALT1)                                                       | GO:0003831-beta-N-acetylglucosaminylglycopeptide beta-1,4-galactosyltransferase activity,GO:0003945-N-acetylglucosaminyl synthase activity,GO:0004461-lactose synthase activity,GO:0030145-manganese ion binding,                                                                                                                                                                                                                                                                                                                      |
| DistUt | DOWN | HSD11B1      | hydroxysteroid 11-beta dehydrogenase 1(HSD11B1)                                                 | GO:0003845-11-beta-hydroxysteroid dehydrogenase [NAD(P)] activity,                                                                                                                                                                                                                                                                                                                                                                                                                                                                     |
| DistUt | DOWN | GNAI1        | G protein subunit alpha ii(GNAI1)                                                               | GO:0003924-GTPase activity,GO:0004871-signal transducer activity,GO:0005525-GTP binding,GO:0031683-G-protein beta/gamma-subunit complex binding,GO:0031821-G-protein coupled serotonin receptor binding,                                                                                                                                                                                                                                                                                                                               |
| DistUt | DOWN | ADAM22       | ADAM metalloproteinase domain 22(ADAM22)                                                        | GO:0004222-metalloendopeptidase activity,                                                                                                                                                                                                                                                                                                                                                                                                                                                                                              |
| DistUt | DOWN | MMP1         | matrix metalloproteinase 1(MMP1)                                                                | GO:0004222-metalloendopeptidase activity,GO:0005509-calcium ion binding,GO:0008270-zinc ion binding,                                                                                                                                                                                                                                                                                                                                                                                                                                   |
| DistUt | DOWN | MMP3         | matrix metalloproteinase 3 (stromelysin 1, progelatinase)(MMP3)                                 | GO:0004222-metalloendopeptidase activity,GO:0005509-calcium ion binding,GO:0008270-zinc ion binding,                                                                                                                                                                                                                                                                                                                                                                                                                                   |
| DistUt | DOWN | ADAMTS5      | ADAM metalloproteinase with thrombospondin type 1 motif 5(ADAMTS5)                              | GO:0004222-metalloendopeptidase activity,GO:0008201-heparin binding,GO:0008270-zinc ion binding,GO:0050840-extracellular matrix binding,                                                                                                                                                                                                                                                                                                                                                                                               |
| DistUt | DOWN | HTRA4        | HtrA serine peptidase 4(HTRA4)                                                                  | GO:0004252-serine-type endopeptidase activity,                                                                                                                                                                                                                                                                                                                                                                                                                                                                                         |
| DistUt | DOWN | PLAU         | plasminogen activator, urokinase(PLAU)                                                          | GO:0004252-serine-type endopeptidase activity,                                                                                                                                                                                                                                                                                                                                                                                                                                                                                         |
| DistUt | DOWN | PRSS23       | protease, serine 23(PRSS23)                                                                     | GO:0004252-serine-type endopeptidase activity,                                                                                                                                                                                                                                                                                                                                                                                                                                                                                         |
| DistUt | DOWN | FAP          | fibroblast activation protein alpha(FAP)                                                        | GO:0004252-serine-type endopeptidase activity,GO:0008239-dipeptidyl-peptidase activity,                                                                                                                                                                                                                                                                                                                                                                                                                                                |
| DistUt | DOWN | GCLM         | glutamate-cysteine ligase modifier subunit(GCLM)                                                | GO:0004357-glutamate-cysteine ligase activity,GO:0030234-enzyme regulator activity,                                                                                                                                                                                                                                                                                                                                                                                                                                                    |
| DistUt | DOWN | NPR2         | natriuretic peptide receptor B/guanylate cyclase B (atrialnatriuretic peptide receptor B)(NPR2) | GO:0004383-guanylate cyclase activity,GO:0004672-protein kinase activity,GO:0005524-ATP binding,GO:0016941-natriuretic peptide receptor activity,GO:0042562-hormone binding,                                                                                                                                                                                                                                                                                                                                                           |
| DistUt | DOWN | ME1          | malic enzyme 1(ME1)                                                                             | GO:0004470-malic enzyme activity,GO:0004471-malate dehydrogenase (decarboxylating) (NAD+) activity,GO:0004473-malate dehydrogenase (decarboxylating) (NADP+) activity,GO:0008948-oxaloacetate decarboxylase activity,GO:0030145-manganese ion binding,GO:0051287-NAD binding,                                                                                                                                                                                                                                                          |
| DistUt | DOWN | PELO         | pelota homolog (Drosophila)(PELO)                                                               | GO:0004519-endonuclease activity,GO:0046872-metal ion binding,                                                                                                                                                                                                                                                                                                                                                                                                                                                                         |
| DistUt | DOWN | MAN2A1       | mannosidase alpha class 2A member 1(MAN2A1)                                                     | GO:0004559-alpha-mannosidase activity,GO:0008270-zinc ion binding,GO:0016799-hydrolase activity, hydrolyzing N-glycosyl compounds,GO:0030246-carbohydrate binding,                                                                                                                                                                                                                                                                                                                                                                     |
| DistUt | DOWN | EDEM3        | ER degradation enhancing alpha-mannosidase like protein 3(EDEM3)                                | GO:0004569-glycoprotein endo-alpha-1,2-mannosidase activity,GO:0004571-mannosyl-oligosaccharide 1,2-alpha-mannosidase activity,GO:0005509-calcium ion binding,                                                                                                                                                                                                                                                                                                                                                                         |
| DistUt | DOWN | GPX8         | glutathione peroxidase 8 (putative)(GPX8)                                                       | GO:0004602-glutathione peroxidase activity,                                                                                                                                                                                                                                                                                                                                                                                                                                                                                            |
| DistUt | DOWN | EIF2AK3      | eukaryotic translation initiation factor 2 alpha kinase 3(EIF2AK3)                              | GO:0004672-protein kinase activity,GO:0004694-eukaryotic translation initiation factor 2alpha kinase activity,GO:0005524-ATP binding,                                                                                                                                                                                                                                                                                                                                                                                                  |
| DistUt | DOWN | EPHA4        | EPH receptor A4(EPHA4)                                                                          | GO:0004672-protein kinase activity,GO:0005003-ephrin receptor activity,GO:0005004-GPI-linked ephrin receptor activity,GO:0005005-transmembrane-ephrin receptor activity,GO:0005524-ATP binding,GO:0097161-DH domain binding,                                                                                                                                                                                                                                                                                                           |
| DistUt | DOWN | PDP1         | pyruvate dehydrogenase phosphatase catalytic subunit 1(PDP1)                                    | GO:0004722-protein serine/threonine phosphatase activity,GO:0004741-[pyruvate dehydrogenase (lipoamide)] phosphatase activity,GO:0046872-metal ion binding,                                                                                                                                                                                                                                                                                                                                                                            |
| DistUt | DOWN | RNF11        | ring finger protein 11(RNF11)                                                                   | GO:0004842-ubiquitin-protein transferase activity,GO:0008270-zinc ion binding,                                                                                                                                                                                                                                                                                                                                                                                                                                                         |
| DistUt | DOWN | DCN          | decorin(DCN)                                                                                    | GO:0004860-protein kinase inhibitor activity,GO:0005518-collagen binding,GO:0005539-glycosaminoglycan binding,GO:0044822-poly(A) RNA binding,GO:0050840-extracellular matrix binding,                                                                                                                                                                                                                                                                                                                                                  |
| DistUt | DOWN | LOC100517015 | cAMP-dependent protein kinase inhibitor beta-like(LOC100517015)                                 | GO:0004862-cAMP-dependent protein kinase inhibitor activity,                                                                                                                                                                                                                                                                                                                                                                                                                                                                           |
| DistUt | DOWN | COL6A3       | collagen type VI alpha 3 chain(COL6A3)                                                          | GO:0004867-serine-type endopeptidase inhibitor activity,                                                                                                                                                                                                                                                                                                                                                                                                                                                                               |

|        |      |              |                                                                      |                                                                                                                                                                                                                                       |
|--------|------|--------------|----------------------------------------------------------------------|---------------------------------------------------------------------------------------------------------------------------------------------------------------------------------------------------------------------------------------|
| DistUt | DOWN | GJA1         | gap junction protein alpha 1(GJA1)                                   | GO:0004871-signal transducer activity,GO:0015075-ion transmembrane transporter activity,GO:0022857-transmembrane transporter activity,GO:1903763-gap junction channel activity involved in cell communication by electrical coupling, |
| DistUt | DOWN | MRC2         | mannose receptor C type 2(MRC2)                                      | GO:0004888-transmembrane signaling receptor activity,                                                                                                                                                                                 |
| DistUt | DOWN | LOC100157704 | olfactory receptor 1L8-like(LOC100157704)                            | GO:0004888-transmembrane signaling receptor activity,GO:0004930-G-protein coupled receptor activity,GO:0004984-olfactory receptor activity,                                                                                           |
| DistUt | DOWN | FRZB         | frizzled-related protein(FRZB)                                       | GO:0004930-G-protein coupled receptor activity,GO:0017147-Wnt-protein binding,GO:0042813-Wnt-activated receptor activity,                                                                                                             |
| DistUt | DOWN | PTGFR        | prostaglandin F receptor(PTGFR)                                      | GO:0004958-prostaglandin F receptor activity,                                                                                                                                                                                         |
| DistUt | DOWN | HRH1         | histamine receptor H1(HRH1)                                          | GO:0004969-histamine receptor activity,                                                                                                                                                                                               |
| DistUt | DOWN | HTR2A        | 5-hydroxytryptamine receptor 2A(HTR2A)                               | GO:0004993-G-protein coupled serotonin receptor activity,GO:0008144-drug binding,GO:0030594-neurotransmitter receptor activity,GO:0051378-serotonin binding,GO:0071886-1-(4-iodo-2,5-dimethoxyphenyl)propan-2-amine binding,          |
| DistUt | DOWN | FGFR1        | fibroblast growth factor receptor 1(FGFR1)                           | GO:0005007-fibroblast growth factor-activated receptor activity,GO:0005524-ATP binding,GO:0008201-heparin binding,                                                                                                                    |
| DistUt | DOWN | ACKR3        | atypical chemokine receptor 3(ACKR3)                                 | GO:0005044-scavenger receptor activity,GO:0015026-coreceptor activity,GO:0016494-C-X-C chemokine receptor activity,                                                                                                                   |
| DistUt | DOWN | WNT2         | Wnt family member 2(WNT2)                                            | GO:0005109-frizzled binding,                                                                                                                                                                                                          |
| DistUt | DOWN | FBN1         | fibrillin 1(FBN1)                                                    | GO:0005179-hormone activity,GO:0005201-extracellular matrix structural constituent,GO:0005509-calcium ion binding,GO:0008201-heparin binding,                                                                                         |
| DistUt | DOWN | CLDN11       | claudin 11(CLDN11)                                                   | GO:0005198-structural molecule activity,                                                                                                                                                                                              |
| DistUt | DOWN | COL1A2       | collagen type I alpha 2 chain(COL1A2)                                | GO:0005201-extracellular matrix structural constituent,                                                                                                                                                                               |
| DistUt | DOWN | COL3A1       | collagen type III alpha 1 chain(COL3A1)                              | GO:0005201-extracellular matrix structural constituent,                                                                                                                                                                               |
| DistUt | DOWN | COL4A1       | collagen type IV alpha 1 chain(COL4A1)                               | GO:0005201-extracellular matrix structural constituent,                                                                                                                                                                               |
| DistUt | DOWN | COL5A2       | collagen type V alpha 2 chain(COL5A2)                                | GO:0005201-extracellular matrix structural constituent,                                                                                                                                                                               |
| DistUt | DOWN | VCAN         | versican(VCAN)                                                       | GO:0005201-extracellular matrix structural constituent,GO:0005509-calcium ion binding,GO:0005540-hyaluronic acid binding,                                                                                                             |
| DistUt | DOWN | CRYGS        | crystallin gamma 5(CRYGS)                                            | GO:0005212-structural constituent of eye lens,                                                                                                                                                                                        |
| DistUt | DOWN | SLCO2A1      | solute carrier organic anion transporter family, member 2A1(SLCO2A1) | GO:0005215-transporter activity,                                                                                                                                                                                                      |
| DistUt | DOWN | SLC38A1      | solute carrier family 38 member 1(SLC38A1)                           | GO:0005290-L-histidine transmembrane transporter activity,GO:0015182-L-asparagine transmembrane transporter activity,GO:0015186-L-glutamine transmembrane transporter activity,                                                       |
| DistUt | DOWN | SLC30A7      | solute carrier family 30 member 7(SLC30A7)                           | GO:0005385-zinc ion transmembrane transporter activity,                                                                                                                                                                               |
| DistUt | DOWN | FBXL5        | F-box and leucine rich repeat protein 5(FBXL5)                       | GO:0005506-iron ion binding,                                                                                                                                                                                                          |
| DistUt | DOWN | PLOD2        | procollagen-lysine,2-oxoglutarate 5-dioxygenase 2(PLOD2)             | GO:0005506-iron ion binding,GO:0008475-procollagen-lysine 5-dioxygenase activity,GO:0031418-L-ascorbic acid binding,                                                                                                                  |
| DistUt | DOWN | PRNP         | prion protein(PRNP)                                                  | GO:0005507-copper ion binding,GO:0008017-microtubule binding,GO:0015631-tubulin binding,GO:0042802-identical protein binding,                                                                                                         |
| DistUt | DOWN | CDH11        | cadherin 11(CDH11)                                                   | GO:0005509-calcium ion binding,                                                                                                                                                                                                       |
| DistUt | DOWN | CALU         | calumenin(CALU)                                                      | GO:0005509-calcium ion binding,                                                                                                                                                                                                       |
| DistUt | DOWN | LOC100520265 | protocadherin-9(LOC100520265)                                        | GO:0005509-calcium ion binding,                                                                                                                                                                                                       |
| DistUt | DOWN | SPARC        | secreted protein, acidic, cysteine-rich (osteonectin)(SPARC)         | GO:0005509-calcium ion binding,GO:0005518-collagen binding,GO:0050840-extracellular matrix binding,                                                                                                                                   |
| DistUt | DOWN | ANXA5        | annexin A5(ANXA5)                                                    | GO:0005509-calcium ion binding,GO:0005544-calcium-dependent phospholipid binding,                                                                                                                                                     |
| DistUt | DOWN | CD248        | CD248 molecule(CD248)                                                | GO:0005509-calcium ion binding,GO:0050840-extracellular matrix binding,                                                                                                                                                               |
| DistUt | DOWN | HSPA13       | heat shock protein family A (Hsp70) member 13(HSPA13)                | GO:0005524-ATP binding,                                                                                                                                                                                                               |
| DistUt | DOWN | ABCB1        | ATP-binding cassette, sub-family B (MDR/TAP), member 1(ABCB1)        | GO:0005524-ATP binding,GO:0042626-ATPase activity, coupled to transmembrane movement of substances,                                                                                                                                   |
| DistUt | DOWN | LOC100152428 | multidrug resistance-associated protein 1-like(LOC100152428)         | GO:0005524-ATP binding,GO:0042626-ATPase activity, coupled to transmembrane movement of substances,                                                                                                                                   |
| DistUt | DOWN | ARF4         | ADP ribosylation factor 4(ARF4)                                      | GO:0005525-GTP binding,                                                                                                                                                                                                               |
| DistUt | DOWN | RASL12       | RAS like family 12(RASL12)                                           | GO:0005525-GTP binding,                                                                                                                                                                                                               |
| DistUt | DOWN | RND3         | Rho family GTPase 3(RND3)                                            | GO:0005525-GTP binding,                                                                                                                                                                                                               |
| DistUt | DOWN | CRISPLD2     | cysteine rich secretory protein LCCL domain containing 2(CRISPLD2)   | GO:0008201-heparin binding,                                                                                                                                                                                                           |
| DistUt | DOWN | MORC3        | MORC family CW-type zinc finger 3(MORC3)                             | GO:0008270-zinc ion binding,                                                                                                                                                                                                          |
| DistUt | DOWN | SEC23A       | Sec23 homolog A, coat complex II component(SEC23A)                   | GO:0008270-zinc ion binding,                                                                                                                                                                                                          |
| DistUt | DOWN | SEC23B       | Sec23 homolog B, coat complex II component(SEC23B)                   | GO:0008270-zinc ion binding,                                                                                                                                                                                                          |
| DistUt | DOWN | ENPEP        | glutamyl aminopeptidase(ENPEP)                                       | GO:0008270-zinc ion binding,GO:0042277-peptide binding,GO:0070006-metalloaminopeptidase activity,                                                                                                                                     |
| DistUt | DOWN | BGALT2       | beta-1,3-galactosyltransferase 2(B3GALT2)                            | GO:0008499-UDP-galactose:beta-N-acetylglucosamine beta-1,3-galactosyltransferase activity,                                                                                                                                            |
| DistUt | DOWN | STEAP2       | STEAP2 metalloductase(STEAP2)                                        | GO:0008823-cupric reductase activity,GO:0052851-ferric-chelate reductase (NADPH) activity,                                                                                                                                            |
| DistUt | DOWN | FAM213A      | family with sequence similarity 213 member A(FAM213A)                | GO:0016209-antioxidant activity,                                                                                                                                                                                                      |
| DistUt | DOWN | HSD17B11     | hydroxysteroid 17-beta dehydrogenase 11(HSD17B11)                    | GO:0016229-steroid dehydrogenase activity,                                                                                                                                                                                            |
| DistUt | DOWN | PLEKHA8      | pleckstrin homology domain containing A8(PLEKHA8)                    | GO:0017089-glycolipid transporter activity,GO:0051861-glycolipid binding,GO:0070273-phosphatidylinositol-4-phosphate binding,GO:0097001-ceramide binding,                                                                             |
| DistUt | DOWN | NCEH1        | neutral cholesterol ester hydrolase 1(NCEH1)                         | GO:0017171-serine hydrolase activity,GO:0042301-phosphate ion binding,GO:0052689-carboxylic ester hydrolase activity,                                                                                                                 |
| DistUt | DOWN | PPP4R4       | protein phosphatase 4 regulatory subunit 4(PPP4R4)                   | GO:0019888-protein phosphatase regulator activity,                                                                                                                                                                                    |
| DistUt | DOWN | LOC100739844 | semaphorin-3A-like(LOC100739844)                                     | GO:0030215-semaphorin receptor binding,GO:0038191-neuropilin binding,GO:0045499-chemorepellent activity,                                                                                                                              |
| DistUt | DOWN | PLAUR        | plasminogen activator, urokinase receptor(PLAUR)                     | GO:0030377-urokinase plasminogen activator receptor activity,                                                                                                                                                                         |
| DistUt | DOWN | WIPI1        | WD repeat domain, phosphoinositide interacting 1(WIPI1)              | GO:0032266-phosphatidylinositol-3-phosphate binding,GO:0080025-phosphatidylinositol-3,5-bisphosphate binding,                                                                                                                         |
| DistUt | DOWN | INPP5F       | inositol polyphosphate-5-phosphatase F(INPP5F)                       | GO:0034595-phosphatidylinositol phosphate 5-phosphatase activity,GO:0034596-phosphatidylinositol phosphate 4-phosphatase activity,GO:0052833-inositol monophosphate 4-phosphatase activity,                                           |

|        |      |              |                                                                        |                                                                                                                                                                                                                                                                                                                                                                                                                            |
|--------|------|--------------|------------------------------------------------------------------------|----------------------------------------------------------------------------------------------------------------------------------------------------------------------------------------------------------------------------------------------------------------------------------------------------------------------------------------------------------------------------------------------------------------------------|
| DistUt | DOWN | LOC100738373 | epidermal growth factor receptor kinase substrate 8-like(LOC100738373) | GO:0035591-signaling adaptor activity,                                                                                                                                                                                                                                                                                                                                                                                     |
| DistUt | DOWN | SIPR3        | sphingosine-1-phosphate receptor 3(SIPR3)                              | GO:0038036-sphingosine-1-phosphate receptor activity,                                                                                                                                                                                                                                                                                                                                                                      |
| DistUt | DOWN | HOXA10       | homeobox A10(HOXA10)                                                   | GO:0043565-sequence-specific DNA binding,                                                                                                                                                                                                                                                                                                                                                                                  |
| DistUt | DOWN | HOXA10       | homeobox A10(HOXA10)                                                   | GO:0043565-sequence-specific DNA binding,                                                                                                                                                                                                                                                                                                                                                                                  |
| DistUt | DOWN | BICC1        | BicC family RNA binding protein 1(BICC1)                               | GO:0044822-poly(A) RNA binding,                                                                                                                                                                                                                                                                                                                                                                                            |
| DistUt | DOWN | SEC63        | SEC63 homolog, protein translocation regulator(SEC63)                  | GO:0044822-poly(A) RNA binding,                                                                                                                                                                                                                                                                                                                                                                                            |
| DistUt | DOWN | HELZ         | helicase with zinc finger(HELZ)                                        | GO:0044822-poly(A) RNA binding,GO:0046872-metal ion binding,                                                                                                                                                                                                                                                                                                                                                               |
| DistUt | DOWN | SLC39A7      | solute carrier family 39 member 7(SLC39A7)                             | GO:0046873-metal ion transmembrane transporter activity,                                                                                                                                                                                                                                                                                                                                                                   |
| DistUt | DOWN | KDEL3        | KDEL endoplasmic reticulum protein retention receptor 3(KDEL3)         | GO:0046923-ER retention sequence binding,                                                                                                                                                                                                                                                                                                                                                                                  |
| DistUt | DOWN | GCNT3        | glucosaminyl (N-acetyl) transferase 3, mucin type(GCNT3)               | GO:0047225-acetylgalactosaminyl-O-glycosyl-glycoprotein beta-1,6-N-acetylglucosaminyltransferase activity,                                                                                                                                                                                                                                                                                                                 |
| DistUt | DOWN | DMP1         | dentin matrix acidic phosphoprotein 1(DMP1)                            | GO:0050840-extracellular matrix binding,                                                                                                                                                                                                                                                                                                                                                                                   |
| DistUt | DOWN | CFL2         | cofilin 2(CFL2)                                                        | GO:0051015-actin filament binding,                                                                                                                                                                                                                                                                                                                                                                                         |
| DistUt | DOWN | SLC41A2      | solute carrier family 41 member 2(SLC41A2)                             | GO:0072509-divalent inorganic cation transmembrane transporter activity,                                                                                                                                                                                                                                                                                                                                                   |
| ProxUt | UP   | CELF4        | CUGBP, Elav-like family member 4(CELF4)                                | GO:000166-nucleotide binding,GO:0003729-mRNA binding,                                                                                                                                                                                                                                                                                                                                                                      |
| ProxUt | UP   | STK11        | serine/threonine kinase 11(STK11)                                      | GO:000287-magnesium ion binding,GO:0004674-protein serine/threonine kinase activity,GO:0055524-ATP binding,GO:0030295-protein kinase activator activity,                                                                                                                                                                                                                                                                   |
| ProxUt | UP   | HSF1         | heat shock transcription factor 1(HSF1)                                | GO:000978-RNA polymerase II core promoter proximal region sequence-specific DNA binding,GO:000979-RNA polymerase II core promoter sequence-specific DNA binding,GO:001078-transcriptional repressor activity, RNA polymerase II core promoter proximal region sequence-specific binding,GO:0001162-RNA polymerase II intronic transcription regulatory region sequence-specific DNA binding,GO:0003682-chromatin binding,  |
| ProxUt | UP   | RREB1        | ras responsive element binding protein 1(RREB1)                        | GO:000979-RNA polymerase II core promoter sequence-specific DNA binding,GO:0003676-nucleic acid binding,GO:0003700-transcription factor activity, sequence-specific DNA binding,GO:0043565-sequence-specific DNA binding,GO:0044212-transcription regulatory region DNA binding,GO:0046872-metal ion binding,                                                                                                              |
| ProxUt | UP   | MLXIP        | MLX interacting protein(MLXIP)                                         | GO:000989-transcription factor activity, transcription factor binding,GO:0003700-transcription factor activity, sequence-specific DNA binding,                                                                                                                                                                                                                                                                             |
| ProxUt | UP   | CHST4        | carbohydrate sulfotransferase 4(CHST4)                                 | GO:0001517-N-acetylglucosamine 6-O-sulfotransferase activity,                                                                                                                                                                                                                                                                                                                                                              |
| ProxUt | UP   | JAZF1        | JAZF zinc finger 1(JAZF1)                                              | GO:0003676-nucleic acid binding,GO:0003714-transcription corepressor activity,GO:0046872-metal ion binding,                                                                                                                                                                                                                                                                                                                |
| ProxUt | UP   | LOC100152736 | zinc finger protein 142(LOC100152736)                                  | GO:0003676-nucleic acid binding,GO:0046872-metal ion binding,                                                                                                                                                                                                                                                                                                                                                              |
| ProxUt | UP   | ZNF576       | zinc finger protein 576(ZNF576)                                        | GO:0003676-nucleic acid binding,GO:0046872-metal ion binding,                                                                                                                                                                                                                                                                                                                                                              |
| ProxUt | UP   | ZNF697       | zinc finger protein 697(ZNF697)                                        | GO:0003676-nucleic acid binding,GO:0046872-metal ion binding,                                                                                                                                                                                                                                                                                                                                                              |
| ProxUt | UP   | DEAF1        | DEAF1, transcription factor(DEAF1)                                     | GO:0003677-DNA binding,GO:0003700-transcription factor activity, sequence-specific DNA binding,GO:0046872-metal ion binding,                                                                                                                                                                                                                                                                                               |
| ProxUt | UP   | THAP11       | THAP domain containing 11(THAP11)                                      | GO:0003677-DNA binding,GO:0008270-zinc ion binding,                                                                                                                                                                                                                                                                                                                                                                        |
| ProxUt | UP   | SP7          | Sp7 transcription factor(SP7)                                          | GO:0003677-DNA binding,GO:0046872-metal ion binding,                                                                                                                                                                                                                                                                                                                                                                       |
| ProxUt | UP   | DDB1         | damage specific DNA binding protein 1(DDB1)                            | GO:0003684-damaged DNA binding,                                                                                                                                                                                                                                                                                                                                                                                            |
| ProxUt | UP   | TMSB4X       | thymosin beta 4, X-linked(TMSB4X)                                      | GO:0003785-actin monomer binding,                                                                                                                                                                                                                                                                                                                                                                                          |
| ProxUt | UP   | DGATI        | diacylglycerol O-acyltransferase 1(DGATI)                              | GO:0003846-2-acylglycerol O-acyltransferase activity,GO:0004144-diacylglycerol O-acyltransferase activity,GO:0008374-O-acyltransferase activity,GO:0016746-transferase activity, transferring acyl groups,                                                                                                                                                                                                                 |
| ProxUt | UP   | CRYL1        | crystallin lambda 1(CRYL1)                                             | GO:0003857-3-hydroxyacyl-CoA dehydrogenase activity,GO:0050104-L-gulonate 3-dehydrogenase activity,GO:0074003-NAD+ binding,                                                                                                                                                                                                                                                                                                |
| ProxUt | UP   | ALDH2        | aldehyde dehydrogenase 2 family (mitochondrial)(ALDH2)                 | GO:0004029-aldehyde dehydrogenase (NAD) activity,GO:0016620-oxidoreductase activity, acting on the aldehyde or oxo group of donors, NAD or NADP as acceptor,                                                                                                                                                                                                                                                               |
| ProxUt | UP   | RHBDL1       | rhomboid like 1(RHBDL1)                                                | GO:0004252-serine-type endopeptidase activity,                                                                                                                                                                                                                                                                                                                                                                             |
| ProxUt | UP   | MST1         | macrophage stimulating 1(MST1)                                         | GO:0004252-serine-type endopeptidase activity,                                                                                                                                                                                                                                                                                                                                                                             |
| ProxUt | UP   | GALK1        | galactokinase 1(GALK1)                                                 | GO:0004335-galactokinase activity,GO:0005524-ATP binding,GO:0005534-galactose binding,                                                                                                                                                                                                                                                                                                                                     |
| ProxUt | UP   | KHK          | ketohehexokinase(KHK)                                                  | GO:0004454-ketohehexokinase activity,                                                                                                                                                                                                                                                                                                                                                                                      |
| ProxUt | UP   | PCBD1        | pterin-4 alpha-carbinolamine dehydratase 1(PCBD1)                      | GO:0004505-phenylalanine 4-monoxygenase activity,GO:0008124-4-alpha-hydroxytetrahydrobiopterin dehydratase activity,                                                                                                                                                                                                                                                                                                       |
| ProxUt | UP   | GRK1         | G protein-coupled receptor kinase 1(GRK1)                              | GO:0004703-G-protein coupled receptor kinase activity,GO:0005524-ATP binding,GO:0050254-rhodopsin kinase activity,                                                                                                                                                                                                                                                                                                         |
| ProxUt | UP   | MTMR7        | myotubularin related protein 7(MTMR7)                                  | GO:0004725-protein tyrosine phosphatase activity,GO:0052866-phosphatidylinositol phosphate phosphatase activity,                                                                                                                                                                                                                                                                                                           |
| ProxUt | UP   | SDR16C5      | short chain dehydrogenase/reductase family 16C, member 5(SDR16C5)      | GO:0004745-retinol dehydrogenase activity,                                                                                                                                                                                                                                                                                                                                                                                 |
| ProxUt | UP   | SPR          | sepiapterin reductase (7,8-dihydrobiopterin:NADP+ oxidoreductase)(SPR) | GO:0004757-sepiapterin reductase activity,                                                                                                                                                                                                                                                                                                                                                                                 |
| ProxUt | UP   | RTN4RL1      | reticulin 4 receptor like 1(RTN4RL1)                                   | GO:0004860-protein kinase inhibitor activity,                                                                                                                                                                                                                                                                                                                                                                              |
| ProxUt | UP   | GPR26        | G protein-coupled receptor 26(GPR26)                                   | GO:0004930-G-protein coupled receptor activity,                                                                                                                                                                                                                                                                                                                                                                            |
| ProxUt | UP   | LOC100516511 | olfactory receptor 1A1(LOC100516511)                                   | GO:0004930-G-protein coupled receptor activity,GO:0004984-olfactory receptor activity,                                                                                                                                                                                                                                                                                                                                     |
| ProxUt | UP   | ADRA1A       | adrenoceptor alpha 1A(ADRA1A)                                          | GO:0004937-alpha1-adrenergic receptor activity,                                                                                                                                                                                                                                                                                                                                                                            |
| ProxUt | UP   | ADRA2A       | adrenoceptor alpha 2A(ADRA2A)                                          | GO:0004938-alpha2-adrenergic receptor activity,GO:0019901-protein kinase binding,GO:0031692-alpha-1B adrenergic receptor binding,GO:0031696-alpha-2C adrenergic receptor binding,GO:0031996-thioesterase binding,GO:0032795-heterotrimeric G-protein binding,GO:0042803-protein homodimerization activity,GO:0046982-protein heterodimerization activity,GO:0051379-epinephrine binding,GO:0051380-norepinephrine binding, |
| ProxUt | UP   | RXFP4        | relaxin/insulin like family peptide receptor 4(RXFP4)                  | GO:0004945-angiotensin type II receptor activity,GO:0008528-G-protein coupled peptide receptor activity,                                                                                                                                                                                                                                                                                                                   |
| ProxUt | UP   | LOC100524975 | olfactory receptor 10H1(LOC100524975)                                  | GO:0004984-olfactory receptor activity,GO:0004993-G-protein coupled serotonin receptor activity,GO:0030594-neurotransmitter receptor activity,                                                                                                                                                                                                                                                                             |
| ProxUt | UP   | VIPR1        | vasoactive intestinal peptide receptor 1(VIPR1)                        | GO:0004999-vasoactive intestinal polypeptide receptor activity,                                                                                                                                                                                                                                                                                                                                                            |
| ProxUt | UP   | IL17D        | interleukin 17D(IL17D)                                                 | GO:0005125-cytokine activity,GO:0005126-cytokine receptor binding,                                                                                                                                                                                                                                                                                                                                                         |
| ProxUt | UP   | LIM2         | lens intrinsic membrane protein 2(LIM2)                                | GO:0005212-structural constituent of eye lens,                                                                                                                                                                                                                                                                                                                                                                             |

|        |      |              |                                                                       |                                                                                                                                                                                                                                                                                                                                                                                                                             |
|--------|------|--------------|-----------------------------------------------------------------------|-----------------------------------------------------------------------------------------------------------------------------------------------------------------------------------------------------------------------------------------------------------------------------------------------------------------------------------------------------------------------------------------------------------------------------|
| ProxUt | UP   | KCNQ4        | potassium voltage-gated channel subfamily Q member 4(KCNQ4)           | GO:0005251-delayed rectifier potassium channel activity,                                                                                                                                                                                                                                                                                                                                                                    |
| ProxUt | UP   | LOC100515312 | C2 calcium-dependent domain-containing protein 4D-like(LOC100515312)  | GO:0005509-calcium ion binding,GO:0005544-calcium-dependent phospholipid binding,                                                                                                                                                                                                                                                                                                                                           |
| ProxUt | UP   | CALM1        | calmodulin 1(CALM1)                                                   | GO:0005509-calcium ion binding,GO:0072542-protein phosphatase activator activity,                                                                                                                                                                                                                                                                                                                                           |
| ProxUt | UP   | MAPT         | microtubule associated protein tau(MAPT)                              | GO:0008017-microtubule binding,GO:0071813-lipoprotein particle binding,                                                                                                                                                                                                                                                                                                                                                     |
| ProxUt | UP   | JADE3        | jade family PHD finger 3(JADE3)                                       | GO:0008270-zinc ion binding,                                                                                                                                                                                                                                                                                                                                                                                                |
| ProxUt | UP   | ZSWIM1       | zinc finger SWIM-type containing 1(ZSWIM1)                            | GO:0008270-zinc ion binding,                                                                                                                                                                                                                                                                                                                                                                                                |
| ProxUt | UP   | PGLYRP1      | peptidoglycan recognition protein 1(PGLYRP1)                          | GO:0008270-zinc ion binding,GO:0008745-N-acetylmuramoyl-L-alanine amidase activity,                                                                                                                                                                                                                                                                                                                                         |
| ProxUt | UP   | RNF152       | ring finger protein 152(RNF152)                                       | GO:0008270-zinc ion binding,GO:0061630-ubiquitin protein ligase activity,                                                                                                                                                                                                                                                                                                                                                   |
| ProxUt | UP   | RHCG         | Rh family C glycoprotein(RHCG)                                        | GO:0008519-ammonium transmembrane transporter activity,GO:0030506-ankyrin binding,                                                                                                                                                                                                                                                                                                                                          |
| ProxUt | UP   | SERINC5      | serine incorporator 5(SERINC5)                                        | GO:0015194-L-serine transmembrane transporter activity,                                                                                                                                                                                                                                                                                                                                                                     |
| ProxUt | UP   | LOC100739011 | putative lipoyltransferase 2, mitochondrial(LOC100739011)             | GO:0016415-octanoyltransferase activity,GO:0033819-lipoyl(octanoyl) transferase activity,                                                                                                                                                                                                                                                                                                                                   |
| ProxUt | UP   | ADHFE1       | alcohol dehydrogenase, iron containing 1(ADHFE1)                      | GO:0016491-oxidoreductase activity,GO:0016616-oxidoreductase activity, acting on the CH-OH group of donors, NAD or NADP as acceptor,GO:0046872-metal ion binding,GO:0047988-hydroxyacid-oxoacid transhydrogenase activity,                                                                                                                                                                                                  |
| ProxUt | UP   | CD207        | CD207 molecule, langerin(CD207)                                       | GO:0030246-carbohydrate binding,                                                                                                                                                                                                                                                                                                                                                                                            |
| ProxUt | UP   | HOXD12       | homeobox D12(HOXD12)                                                  | GO:0043565-sequence-specific DNA binding,                                                                                                                                                                                                                                                                                                                                                                                   |
| ProxUt | UP   | OTOGL        | otogelin like(OTOGL)                                                  | GO:0046556-alpha-L-arabinofuranosidase activity,                                                                                                                                                                                                                                                                                                                                                                            |
| ProxUt | DOWN | IRAK4        | interleukin 1 receptor associated kinase 4(IRAK4)                     | GO:000287-magnesium ion binding,GO:0004672-protein kinase activity,GO:0004674-protein serine/threonine kinase activity,GO:0005524-ATP binding,                                                                                                                                                                                                                                                                              |
| ProxUt | DOWN | RARA         | retinoic acid receptor alpha(RARA)                                    | GO:000977-RNA polymerase II regulatory region sequence-specific DNA binding,GO:0001972-retinoic acid binding,GO:0003707-steroid hormone receptor activity,GO:0003708-retinoic acid receptor activity,GO:0003713-transcription coactivator activity,GO:0003714-transcription corepressor activity,GO:0008270-zinc ion binding,GO:0031490-chromatin DNA binding,GO:0044323-retinoic acid-responsive element binding,          |
| ProxUt | DOWN | ELF4         | E74 like ETS transcription factor 4(ELF4)                             | GO:000978-RNA polymerase II core promoter proximal region sequence-specific DNA binding,GO:0000981-RNA polymerase II transcription factor activity, sequence-specific DNA binding,GO:001077-transcriptional activator activity, RNA polymerase II core promoter proximal region sequence-specific binding,GO:0003700-transcription factor activity, sequence-specific DNA binding,GO:0043565-sequence-specific DNA binding, |
| ProxUt | DOWN | CREB3L2      | cAMP responsive element binding protein 3 like 2(CREB3L2)             | GO:000978-RNA polymerase II core promoter proximal region sequence-specific DNA binding,GO:0001077-transcriptional activator activity, RNA polymerase II core promoter proximal region sequence-specific binding,GO:0035497-cAMP response element binding,                                                                                                                                                                  |
| ProxUt | DOWN | TCF7L2       | transcription factor 7 like 2(TCF7L2)                                 | GO:000978-RNA polymerase II core promoter proximal region sequence-specific DNA binding,GO:0003700-transcription factor activity, sequence-specific DNA binding,GO:0008013-beta-catenin binding,GO:0043565-sequence-specific DNA binding,GO:0044212-transcription regulatory region DNA binding,                                                                                                                            |
| ProxUt | DOWN | EPAS1        | endothelial PAS domain protein 1(EPAS1)                               | GO:000981-RNA polymerase II transcription factor activity, sequence-specific DNA binding,GO:001077-transcriptional activator activity, RNA polymerase II core promoter proximal region sequence-specific binding,GO:0003700-transcription factor activity, sequence-specific DNA binding,GO:0043565-sequence-specific DNA binding,                                                                                          |
| ProxUt | DOWN | ZNF516       | zinc finger protein 516(ZNF516)                                       | GO:000987-core promoter proximal region sequence-specific DNA binding,GO:0003700-transcription factor activity, sequence-specific DNA binding,GO:003613-activating transcription factor binding,GO:0043565-sequence-specific DNA binding,GO:0044212-transcription regulatory region DNA binding,GO:0046872-metal ion binding,                                                                                               |
| ProxUt | DOWN | TDG          | thymine-DNA glycosylase(TDG)                                          | GO:001104-RNA polymerase II transcription cofactor activity,GO:0004844-uracil DNA N-glycosylase activity,GO:0008263-pyrimidine-specific mismatch base pair DNA N-glycosylase activity,GO:0030983-mismatched DNA binding,GO:0043566-structure-specific DNA binding,                                                                                                                                                          |
| ProxUt | DOWN | P2RX7        | purinergic receptor P2X 7(P2RX7)                                      | GO:001530-lipopolysaccharide binding,GO:001614-purinergic nucleotide receptor activity,GO:0004931-extracellular ATP-gated cation channel activity,GO:0005524-ATP binding,                                                                                                                                                                                                                                                   |
| ProxUt | DOWN | AGTR1        | angiotensin II receptor type 1(AGTR1)                                 | GO:0001596-angiotensin type I receptor activity,GO:0004945-angiotensin type II receptor activity,GO:0031711-bradykinin receptor binding,GO:0046982-protein heterodimerization activity,                                                                                                                                                                                                                                     |
| ProxUt | DOWN | MFGE8        | milk fat globule-EGF factor 8 protein(MFGE8)                          | GO:0001786-phosphatidylserine binding,GO:0008429-phosphatidylethanolamine binding,                                                                                                                                                                                                                                                                                                                                          |
| ProxUt | DOWN | ERLEC1       | endoplasmic reticulum lectin 1(ERLEC1)                                | GO:0001948-glycoprotein binding,                                                                                                                                                                                                                                                                                                                                                                                            |
| ProxUt | DOWN | LMAN2        | lectin, mannose binding 2(LMAN2)                                      | GO:0001948-glycoprotein binding,GO:0005537-mannose binding,                                                                                                                                                                                                                                                                                                                                                                 |
| ProxUt | DOWN | AFF2         | AF4/FMR2 family member 2(AFF2)                                        | GO:0002151-G-quadruplex RNA binding,                                                                                                                                                                                                                                                                                                                                                                                        |
| ProxUt | DOWN | AGR2         | anterior gradient 2, protein disulphide isomerase family member(AGR2) | GO:0002162-dystroglycan binding,                                                                                                                                                                                                                                                                                                                                                                                            |
| ProxUt | DOWN | PRDM1        | PR/SET domain 1(PRDM1)                                                | GO:0003676-nucleic acid binding,GO:0003700-transcription factor activity, sequence-specific DNA binding,GO:0046872-metal ion binding,                                                                                                                                                                                                                                                                                       |
| ProxUt | DOWN | ZBTB1        | zinc finger and BTB domain containing 1(ZBTB1)                        | GO:0003676-nucleic acid binding,GO:0046872-metal ion binding,                                                                                                                                                                                                                                                                                                                                                               |
| ProxUt | DOWN | SNAI2        | snail family transcriptional repressor 2(SNAI2)                       | GO:0003676-nucleic acid binding,GO:0046872-metal ion binding,                                                                                                                                                                                                                                                                                                                                                               |
| ProxUt | DOWN | SNAI2        | snail homolog 2 (Drosophila)(SNAI2)                                   | GO:0003676-nucleic acid binding,GO:0046872-metal ion binding,                                                                                                                                                                                                                                                                                                                                                               |
| ProxUt | DOWN | ERCC6        | ERCC excision repair 6, chromatin remodeling factor(ERCC6)            | GO:0003677-DNA binding,GO:0003682-chromatin binding,GO:0005524-ATP binding,GO:0008094-DNA-dependent ATPase activity,GO:0030296-protein tyrosine kinase activator activity,                                                                                                                                                                                                                                                  |
| ProxUt | DOWN | STAT2        | signal transducer and activator of transcription 2(STAT2)             | GO:0003677-DNA binding,GO:0003700-transcription factor activity, sequence-specific DNA binding,GO:0004871-signal transducer activity,                                                                                                                                                                                                                                                                                       |
| ProxUt | DOWN | DCLRE1A      | DNA cross-link repair 1A(DCLRE1A)                                     | GO:0003684-damaged DNA binding,GO:0035312-5'-3' exodeoxyribonuclease activity,                                                                                                                                                                                                                                                                                                                                              |
| ProxUt | DOWN | CREB3L1      | cAMP responsive element binding protein 3 like 1(CREB3L1)             | GO:0003700-transcription factor activity, sequence-specific DNA binding,GO:0035497-cAMP response element binding,GO:0043565-sequence-specific DNA binding,                                                                                                                                                                                                                                                                  |
| ProxUt | DOWN | XBP1         | X-box binding protein 1(XBP1)                                         | GO:0003700-transcription factor activity, sequence-specific DNA binding,GO:0043565-sequence-specific DNA binding,                                                                                                                                                                                                                                                                                                           |
| ProxUt | DOWN | ABHD2        | abhydrolase domain containing 2(ABHD2)                                | GO:0003707-steroid hormone receptor activity,GO:0042562-hormone binding,GO:0047372-acylglycerol lipase activity,                                                                                                                                                                                                                                                                                                            |
| ProxUt | DOWN | MAGED1       | MAGE family member D1(MAGED1)                                         | GO:0003713-transcription coactivator activity,                                                                                                                                                                                                                                                                                                                                                                              |
| ProxUt | DOWN | RAP2C        | RAP2C, member of RAS oncogene family(RAP2C)                           | GO:0003713-transcription coactivator activity,GO:0005525-GTP binding,GO:0019003-GDP binding,                                                                                                                                                                                                                                                                                                                                |
| ProxUt | DOWN | GMNN         | geminin, DNA replication inhibitor(GMNN)                              | GO:0003714-transcription corepressor activity,                                                                                                                                                                                                                                                                                                                                                                              |
| ProxUt | DOWN | FKBP7        | FK506 binding protein 7(FKBP7)                                        | GO:0003755-peptidyl-prolyl cis-trans isomerase activity,GO:0005509-calcium ion binding,GO:0005528-FK506 binding,                                                                                                                                                                                                                                                                                                            |
| ProxUt | DOWN | ERP44        | endoplasmic reticulum protein 44(ERP44)                               | GO:0003756-protein disulfide isomerase activity,                                                                                                                                                                                                                                                                                                                                                                            |
| ProxUt | DOWN | B4GALT1      | beta-1,4-galactosyltransferase 1(B4GALT1)                             | GO:0003831-beta-N-acetylglucosaminylglycopeptide beta-1,4-galactosyltransferase activity,GO:0003945-N-acetylglucosaminylglycopeptide beta-1,4-galactosyltransferase activity,GO:0004461-lactose synthase activity,GO:0030145-manganese ion binding,                                                                                                                                                                         |
| ProxUt | DOWN | HSD11B1      | hydroxysteroid 11-beta dehydrogenase 1(HSD11B1)                       | GO:0003845-11-beta-hydroxysteroid dehydrogenase [NAD(P)] activity,                                                                                                                                                                                                                                                                                                                                                          |

|        |      |              |                                                                   |                                                                                                                                                                                                                                                                 |
|--------|------|--------------|-------------------------------------------------------------------|-----------------------------------------------------------------------------------------------------------------------------------------------------------------------------------------------------------------------------------------------------------------|
| ProxUt | DOWN | GNAI1        | G protein subunit alpha i1(GNAI1)                                 | GO:0003924-GTPase activity,GO:0004871-signal transducer activity,GO:0005525-GTP binding,GO:0031683-G-protein beta/gamma-subunit complex binding,GO:0031821-G-protein coupled serotonin receptor binding,                                                        |
| ProxUt | DOWN | RAB32        | RAB32, member RAS oncogene family(RAB32)                          | GO:0003924-GTPase activity,GO:0005525-GTP binding,                                                                                                                                                                                                              |
| ProxUt | DOWN | SRP54        | signal recognition particle 54(SRP54)                             | GO:0003924-GTPase activity,GO:0005525-GTP binding,GO:0008144-drug binding,GO:0008312-7S RNA binding,GO:0019003-GDP binding,GO:0030942-endoplasmic reticulum signal peptide binding,GO:0043021-ribonucleoprotein complex binding,GO:0044822-poly(A) RNA binding, |
| ProxUt | DOWN | LOC100736973 | ras-related protein Rap-1b(LOC100736973)                          | GO:0003924-GTPase activity,GO:0005525-GTP binding,GO:0019003-GDP binding,                                                                                                                                                                                       |
| ProxUt | DOWN | PDE7B        | phosphodiesterase 7B(PDE7B)                                       | GO:0004115-3',5'-cyclic-AMP phosphodiesterase activity,GO:0046872-metal ion binding,                                                                                                                                                                            |
| ProxUt | DOWN | DCTD         | dCMP deaminase(DCTD)                                              | GO:0004132-dCMP deaminase activity,GO:0008270-zinc ion binding,                                                                                                                                                                                                 |
| ProxUt | DOWN | ECE1         | endothelin converting enzyme 1(ECE1)                              | GO:0004222-metalloendopeptidase activity,                                                                                                                                                                                                                       |
| ProxUt | DOWN | ADAM22       | ADAM metallopeptidase domain 22(ADAM22)                           | GO:0004222-metalloendopeptidase activity,                                                                                                                                                                                                                       |
| ProxUt | DOWN | ADAM12       | ADAM metallopeptidase domain 12(ADAM12)                           | GO:0004222-metalloendopeptidase activity,                                                                                                                                                                                                                       |
| ProxUt | DOWN | BMP1         | bone morphogenetic protein 1(BMP1)                                | GO:0004222-metalloendopeptidase activity,GO:0005125-cytokine activity,GO:0005160-transforming growth factor beta receptor binding,GO:0005509-calcium ion binding,GO:0008270-zinc ion binding,                                                                   |
| ProxUt | DOWN | MMP1         | matrix metallopeptidase 1(MMP1)                                   | GO:0004222-metalloendopeptidase activity,GO:0005509-calcium ion binding,GO:0008270-zinc ion binding,                                                                                                                                                            |
| ProxUt | DOWN | ADAMTS9      | ADAM metallopeptidase with thrombospondin type 1 motif 9(ADAMTS9) | GO:0004222-metalloendopeptidase activity,GO:0008270-zinc ion binding,                                                                                                                                                                                           |
| ProxUt | DOWN | PLAU         | plasminogen activator, urokinase(PLAU)                            | GO:0004252-serine-type endopeptidase activity,                                                                                                                                                                                                                  |
| ProxUt | DOWN | HTRA4        | HtrA serine peptidase 4(HTRA4)                                    | GO:0004252-serine-type endopeptidase activity,                                                                                                                                                                                                                  |
| ProxUt | DOWN | PRSS23       | protease, serine 23(PRSS23)                                       | GO:0004252-serine-type endopeptidase activity,                                                                                                                                                                                                                  |
| ProxUt | DOWN | FAP          | fibroblast activation protein alpha(FAP)                          | GO:0004252-serine-type endopeptidase activity,GO:0008239-dipeptidyl-peptidase activity,                                                                                                                                                                         |
| ProxUt | DOWN | MAN2A1       | mannosidase alpha class 2A member 1(MAN2A1)                       | GO:0004559-alpha-mannosidase activity,GO:0008270-zinc ion binding,GO:0016799-hydrolase activity, hydrolyzing N-glycosyl compounds,GO:0030246-carbohydrate binding,                                                                                              |
| ProxUt | DOWN | GLB1L        | galactosidase beta 1 like(GLB1L)                                  | GO:0004565-beta-galactosidase activity,                                                                                                                                                                                                                         |
| ProxUt | DOWN | MAN1A1       | mannosidase alpha class 1A member 1(MAN1A1)                       | GO:0004571-mannosyl-oligosaccharide 1,2-alpha-mannosidase activity,GO:0005509-calcium ion binding,                                                                                                                                                              |
| ProxUt | DOWN | GPX8         | glutathione peroxidase 8 (putative)(GPX8)                         | GO:0004602-glutathione peroxidase activity,                                                                                                                                                                                                                     |
| ProxUt | DOWN | CLIC2        | glutathione intracellular channel 2(CLIC2)                        | GO:0004602-glutathione peroxidase activity,GO:0005244-voltage-gated ion channel activity,GO:0005254-chloride channel activity,                                                                                                                                  |
| ProxUt | DOWN | EPHA4        | EPH receptor A4(EPHA4)                                            | GO:0004672-protein kinase activity,GO:0005003-ephrin receptor activity,GO:0005004-GPI-linked ephrin receptor activity,GO:0005005-transmembrane-ephrin receptor activity,GO:0005524-ATP binding,GO:0097161-DH domain binding,                                    |
| ProxUt | DOWN | PDP1         | pyruvate dehydrogenase phosphatase catalytic subunit 1(PDP1)      | GO:0004722-protein serine/threonine phosphatase activity,GO:0004741-[pyruvate dehydrogenase (lipoamide)] phosphatase activity,GO:0046872-metal ion binding,                                                                                                     |
| ProxUt | DOWN | PTPN1        | protein tyrosine phosphatase, non-receptor type 1(PTPN1)          | GO:0004725-protein tyrosine phosphatase activity,GO:0008270-zinc ion binding,GO:0044822-poly(A) RNA binding,                                                                                                                                                    |
| ProxUt | DOWN | USP15        | ubiquitin specific peptidase 15(USP15)                            | GO:0004843-thiol-dependent ubiquitin-specific protease activity,                                                                                                                                                                                                |
| ProxUt | DOWN | LOC100517015 | cAMP-dependent protein kinase inhibitor beta-like(LOC100517015)   | GO:0004862-cAMP-dependent protein kinase inhibitor activity,                                                                                                                                                                                                    |
| ProxUt | DOWN | COL7A1       | collagen type VII alpha 1 chain(COL7A1)                           | GO:0004867-serine-type endopeptidase inhibitor activity,                                                                                                                                                                                                        |
| ProxUt | DOWN | LOC100513074 | serine protease inhibitor Kazal-type 9(LOC100513074)              | GO:0004867-serine-type endopeptidase inhibitor activity,                                                                                                                                                                                                        |
| ProxUt | DOWN | GJA1         | gap junction protein alpha 1(GJA1)                                | GO:0004871-signal transducer activity,GO:0015075-ion transmembrane transporter activity,GO:0022857-transmembrane transporter activity,GO:1903763-gap junction channel activity involved in cell communication by electrical coupling,                           |
| ProxUt | DOWN | MRC2         | mannose receptor C type 2(MRC2)                                   | GO:0004888-transmembrane signaling receptor activity,                                                                                                                                                                                                           |
| ProxUt | DOWN | FRZB         | frizzled-related protein(FRZB)                                    | GO:0004930-G-protein coupled receptor activity,GO:0017147-Wnt-protein binding,GO:0042813-Wnt-activated receptor activity,                                                                                                                                       |
| ProxUt | DOWN | KDR          | kinase insert domain receptor(KDR)                                | GO:0005021-vascular endothelial growth factor-activated receptor activity,GO:0005524-ATP binding,                                                                                                                                                               |
| ProxUt | DOWN | ACKR3        | atypical chemokine receptor 3(ACKR3)                              | GO:0005044-scavenger receptor activity,GO:0015026-coreceptor activity,GO:0016494-C-X-C chemokine receptor activity,                                                                                                                                             |
| ProxUt | DOWN | PLEKHG2      | pleckstrin homology and RhoGEF domain containing G2(PLEKHG2)      | GO:0005089-Rho guanyl-nucleotide exchange factor activity,                                                                                                                                                                                                      |
| ProxUt | DOWN | SIPA1L1      | signal induced proliferation associated 1 like 1(SIPA1L1)         | GO:0005096-GTPase activator activity,                                                                                                                                                                                                                           |
| ProxUt | DOWN | TBC1D15      | TBC1 domain family member 15(TBC1D15)                             | GO:0005096-GTPase activator activity,GO:0017137-Rab GTPase binding,                                                                                                                                                                                             |
| ProxUt | DOWN | WNT2         | Wnt family member 2(WNT2)                                         | GO:0005109-frizzled binding,                                                                                                                                                                                                                                    |
| ProxUt | DOWN | FBN1         | fibrillin 1(FBN1)                                                 | GO:0005179-hormone activity,GO:0005201-extracellular matrix structural constituent,GO:0005509-calcium ion binding,GO:0008201-heparin binding,                                                                                                                   |
| ProxUt | DOWN | CLDN11       | claudin 11(CLDN11)                                                | GO:0005198-structural molecule activity,                                                                                                                                                                                                                        |
| ProxUt | DOWN | ADD3         | adducin 3(ADD3)                                                   | GO:0005198-structural molecule activity,                                                                                                                                                                                                                        |
| ProxUt | DOWN | COL3A1       | collagen type III alpha 1 chain(COL3A1)                           | GO:0005201-extracellular matrix structural constituent,                                                                                                                                                                                                         |
| ProxUt | DOWN | COL1A2       | collagen type I alpha 2 chain(COL1A2)                             | GO:0005201-extracellular matrix structural constituent,                                                                                                                                                                                                         |
| ProxUt | DOWN | VCAN         | versican(VCAN)                                                    | GO:0005201-extracellular matrix structural constituent,GO:0005509-calcium ion binding,GO:0005540-hyaluronic acid binding,                                                                                                                                       |
| ProxUt | DOWN | CRYGS        | crystallin gamma S(CRYGS)                                         | GO:0005212-structural constituent of eye lens,                                                                                                                                                                                                                  |
| ProxUt | DOWN | FBXL5        | F-box and leucine rich repeat protein 5(FBXL5)                    | GO:0005506-iron ion binding,                                                                                                                                                                                                                                    |
| ProxUt | DOWN | PLOD2        | procollagen-lysine,2-oxoglutarate 5-dioxygenase 2(PLOD2)          | GO:0005506-iron ion binding,GO:0008475-procollagen-lysine 5-dioxygenase activity,GO:0031418-L-ascorbic acid binding,                                                                                                                                            |
| ProxUt | DOWN | LOC100520265 | protocadherin-9(LOC100520265)                                     | GO:0005509-calcium ion binding,                                                                                                                                                                                                                                 |
| ProxUt | DOWN | CDH11        | cadherin 11(CDH11)                                                | GO:0005509-calcium ion binding,                                                                                                                                                                                                                                 |
| ProxUt | DOWN | SPARC        | secreted protein, acidic, cysteine-rich (osteonectin)(SPARC)      | GO:0005509-calcium ion binding,GO:0005518-collagen binding,GO:0050840-extracellular matrix binding,                                                                                                                                                             |
| ProxUt | DOWN | FBLN1        | fibulin 1(FBLN1)                                                  | GO:0005509-calcium ion binding,GO:0016504-peptidase activator activity,                                                                                                                                                                                         |
| ProxUt | DOWN | GP2D         | glycerol-3-phosphate dehydrogenase 2(GP2D)                        | GO:0005509-calcium ion binding,GO:0052591-sn-glycerol-3-phosphate:ubiquinone-8 oxidoreductase activity,                                                                                                                                                         |
| ProxUt | DOWN | LUM          | lumican(LUM)                                                      | GO:0005518-collagen binding,                                                                                                                                                                                                                                    |

|        |      |              |                                                                           |                                                                                                                                                                                                                                                                                                                                                                                                                                                                                                                       |
|--------|------|--------------|---------------------------------------------------------------------------|-----------------------------------------------------------------------------------------------------------------------------------------------------------------------------------------------------------------------------------------------------------------------------------------------------------------------------------------------------------------------------------------------------------------------------------------------------------------------------------------------------------------------|
| ProxUt | DOWN | HSPA13       | heat shock protein family A (Hsp70) member 13(HSPA13)                     | GO:0005524-ATP binding,                                                                                                                                                                                                                                                                                                                                                                                                                                                                                               |
| ProxUt | DOWN | NSF          | N-ethylmaleimide sensitive factor, vesicle fusing ATPase(NSF)             | GO:0005524-ATP binding,GO:0016887-ATPase activity,                                                                                                                                                                                                                                                                                                                                                                                                                                                                    |
| ProxUt | DOWN | ABC1         | ATP-binding cassette, sub-family B (MDR/TAP), member 1(ABC1)              | GO:0005524-ATP binding,GO:0042626-ATPase activity, coupled to transmembrane movement of substances,                                                                                                                                                                                                                                                                                                                                                                                                                   |
| ProxUt | DOWN | LOC100152428 | multidrug resistance-associated protein 1-like(LOC100152428)              | GO:0005524-ATP binding,GO:0042626-ATPase activity, coupled to transmembrane movement of substances,                                                                                                                                                                                                                                                                                                                                                                                                                   |
| ProxUt | DOWN | RAB8B        | RAB8B, member RAS oncogene family(RAB8B)                                  | GO:0005525-GTP binding,GO:0019003-GDP binding,                                                                                                                                                                                                                                                                                                                                                                                                                                                                        |
| ProxUt | DOWN | MDF1C        | MyoD family inhibitor domain containing(MDF1C)                            | GO:0008134-transcription factor binding,                                                                                                                                                                                                                                                                                                                                                                                                                                                                              |
| ProxUt | DOWN | CRISPLD2     | cysteine rich secretory protein LCCL domain containing 2(CRISPLD2)        | GO:0008201-heparin binding,                                                                                                                                                                                                                                                                                                                                                                                                                                                                                           |
| ProxUt | DOWN | CPXM1        | carboxypeptidase X, M14 family member 1(CPXM1)                            | GO:0008270-zinc ion binding,                                                                                                                                                                                                                                                                                                                                                                                                                                                                                          |
| ProxUt | DOWN | SEC23A       | Sec23 homolog A, coat complex II component(SEC23A)                        | GO:0008270-zinc ion binding,                                                                                                                                                                                                                                                                                                                                                                                                                                                                                          |
| ProxUt | DOWN | MORC3        | MORC family CW-type zinc finger 3(MORC3)                                  | GO:0008270-zinc ion binding,                                                                                                                                                                                                                                                                                                                                                                                                                                                                                          |
| ProxUt | DOWN | ENPEP        | glutamyl aminopeptidase(ENPEP)                                            | GO:0008270-zinc ion binding,GO:0042277-peptide binding,GO:0070006-metalloaminopeptidase activity,                                                                                                                                                                                                                                                                                                                                                                                                                     |
| ProxUt | DOWN | B3GNT2       | UDP-GlcNAc:betaGal beta-1,3-N-acetylglucosaminyltransferase 2(B3GNT2)     | GO:0008378-galactosyltransferase activity,                                                                                                                                                                                                                                                                                                                                                                                                                                                                            |
| ProxUt | DOWN | B3GALT2      | beta-1,3-galactosyltransferase 2(B3GALT2)                                 | GO:0008499-UDP-galactose:beta-N-acetylglucosamine beta-1,3-galactosyltransferase activity,                                                                                                                                                                                                                                                                                                                                                                                                                            |
| ProxUt | DOWN | SLC12A2      | solute carrier family 12 member 2(SLC12A2)                                | GO:0008519-ammonium transmembrane transporter activity,GO:0015377-cation:chloride symporter activity,                                                                                                                                                                                                                                                                                                                                                                                                                 |
| ProxUt | DOWN | STEAP2       | STEAP2 metalloredutase(STEAP2)                                            | GO:0008823-cupric reductase activity,GO:0052851-ferric-chelate reductase (NADPH) activity,                                                                                                                                                                                                                                                                                                                                                                                                                            |
| ProxUt | DOWN | SLC9B1       | solute carrier family 9 member B1(SLC9B1)                                 | GO:0015299-solute:proton antiporter activity,                                                                                                                                                                                                                                                                                                                                                                                                                                                                         |
| ProxUt | DOWN | NOX4         | NADPH oxidase 4(NOX4)                                                     | GO:0016175-superoxide-generating NADPH oxidase activity,GO:0016491-oxidoreductase activity,GO:0072341-modified amino acid binding,                                                                                                                                                                                                                                                                                                                                                                                    |
| ProxUt | DOWN | ENTPD5       | ectonucleoside triphosphate diphosphohydrolase 5(ENTPD5)                  | GO:0016787-hydrolase activity,                                                                                                                                                                                                                                                                                                                                                                                                                                                                                        |
| ProxUt | DOWN | VNN1         | vanin 1(VNN1)                                                             | GO:0017159-pantetheine hydrolase activity,                                                                                                                                                                                                                                                                                                                                                                                                                                                                            |
| ProxUt | DOWN | NCEH1        | neutral cholesterol ester hydrolase 1(NCEH1)                              | GO:0017171-serine hydrolase activity,GO:0042301-phosphate ion binding,GO:0052689-carboxylic ester hydrolase activity,                                                                                                                                                                                                                                                                                                                                                                                                 |
| ProxUt | DOWN | OLFML3       | olfactomedin like 3(OLFML3)                                               | GO:0019164-pyruvate synthase activity,                                                                                                                                                                                                                                                                                                                                                                                                                                                                                |
| ProxUt | DOWN | PPP4R4       | protein phosphatase 4 regulatory subunit 4(PPP4R4)                        | GO:0019888-protein phosphatase regulator activity,                                                                                                                                                                                                                                                                                                                                                                                                                                                                    |
| ProxUt | DOWN | LOC100739844 | semaphorin-3A-like(LOC100739844)                                          | GO:0030215-semaphorin receptor binding,GO:0038191-neuropilin binding,GO:0045499-chemorepellent activity,                                                                                                                                                                                                                                                                                                                                                                                                              |
| ProxUt | DOWN | SELL         | selectin L(SELL)                                                          | GO:0030246-carbohydrate binding,                                                                                                                                                                                                                                                                                                                                                                                                                                                                                      |
| ProxUt | DOWN | PLAUR        | plasminogen activator, urokinase receptor(PLAUR)                          | GO:0030377-urokinase plasminogen activator receptor activity,                                                                                                                                                                                                                                                                                                                                                                                                                                                         |
| ProxUt | DOWN | LOC100512873 | antileukoproteinase(LOC100512873)                                         | GO:0030414-peptidase inhibitor activity,                                                                                                                                                                                                                                                                                                                                                                                                                                                                              |
| ProxUt | DOWN | LOC100623707 | phosphatidylinositol 3-kinase regulatory subunit alpha-like(LOC100623707) | GO:0035014-phosphatidylinositol 3-kinase regulator activity,GO:0046935-1-phosphatidylinositol-3-kinase regulator activity,                                                                                                                                                                                                                                                                                                                                                                                            |
| ProxUt | DOWN | HOXA10       | homeobox A10(HOXA10)                                                      | GO:0043565-sequence-specific DNA binding,                                                                                                                                                                                                                                                                                                                                                                                                                                                                             |
| ProxUt | DOWN | HOXA10       | homeobox A10(HOXA10)                                                      | GO:0043565-sequence-specific DNA binding,                                                                                                                                                                                                                                                                                                                                                                                                                                                                             |
| ProxUt | DOWN | KDEL3        | KDEL endoplasmic reticulum protein retention receptor 3(KDEL3)            | GO:0046923-ER retention sequence binding,                                                                                                                                                                                                                                                                                                                                                                                                                                                                             |
| ProxUt | DOWN | GCNT3        | glucosaminyl (N-acetyl) transferase 3, mucin type(GCNT3)                  | GO:0047225-acetylglucosaminyl-O-glycosyl-glycoprotein beta-1,6-N-acetylglucosaminyltransferase activity,                                                                                                                                                                                                                                                                                                                                                                                                              |
| ProxUt | DOWN | TCEAL8       | transcription elongation factor A like 8(TCEAL8)                          | GO:0050699-WW domain binding,                                                                                                                                                                                                                                                                                                                                                                                                                                                                                         |
| ProxUt | DOWN | DMP1         | dentin matrix acidic phosphoprotein 1(DMP1)                               | GO:0050840-extracellular matrix binding,                                                                                                                                                                                                                                                                                                                                                                                                                                                                              |
| ProxUt | DOWN | SDC4         | syndecan 4(SDC4)                                                          | GO:0070053-thrombospondin receptor activity,                                                                                                                                                                                                                                                                                                                                                                                                                                                                          |
| UTJ    | UP   | IRF2         | interferon regulatory factor 2(IRF2)                                      | GO:0000975-regulatory region DNA binding,GO:0000977-RNA polymerase II regulatory region sequence-specific DNA binding,GO:0001228-transcriptional activator activity, RNA polymerase II transcription regulatory region sequence-specific binding,GO:0003700-transcription factor activity, sequence-specific DNA binding,                                                                                                                                                                                             |
| UTJ    | UP   | MAFB         | MAF bZIP transcription factor B(MAFB)                                     | GO:0000978-RNA polymerase II core promoter proximal region sequence-specific DNA binding,GO:0001077-transcriptional activator activity, RNA polymerase II core promoter proximal region sequence-specific binding,GO:0001228-transcriptional activator activity, RNA polymerase II transcription regulatory region sequence-specific binding,                                                                                                                                                                         |
| UTJ    | UP   | ZNF217       | zinc finger protein 217(ZNF217)                                           | GO:0000978-RNA polymerase II core promoter proximal region sequence-specific DNA binding,GO:0001078-transcriptional repressor activity, RNA polymerase II core promoter proximal region sequence-specific binding,GO:0003676-nucleic acid binding,GO:0043565-sequence-specific DNA binding,GO:0044212-transcription regulatory region DNA binding,GO:0046872-metal ion binding,                                                                                                                                       |
| UTJ    | UP   | EP300        | E1A binding protein p300(EP300)                                           | GO:0000979-RNA polymerase II core promoter sequence-specific DNA binding,GO:0001228-transcriptional activator activity, RNA polymerase II transcription regulatory region sequence-specific binding,GO:0003684-damaged DNA binding,GO:0003713-transcription coactivator activity,GO:0004402-histone acetyltransferase activity,GO:0004468-lysine N-acetyltransferase activity, acting on acetyl phosphate as donor,GO:0008270-zinc ion binding,GO:0031490-chromatin DNA binding,GO:0097157-pre-mRNA intronic binding, |
| UTJ    | UP   | TSHZ2        | teashirt zinc finger homeobox 2(TSHZ2)                                    | GO:0001078-transcriptional repressor activity, RNA polymerase II core promoter proximal region sequence-specific binding,GO:0003677-DNA binding,GO:0003682-chromatin binding,GO:0046872-metal ion binding,                                                                                                                                                                                                                                                                                                            |
| UTJ    | UP   | JADE1        | jade family PHD finger 1(JADE1)                                           | GO:0001078-RNA polymerase II transcription coactivator activity,GO:0008270-zinc ion binding,                                                                                                                                                                                                                                                                                                                                                                                                                          |
| UTJ    | UP   | ZXDB         | zinc finger, X-linked, duplicated B(ZXDB)                                 | GO:0003676-nucleic acid binding,GO:0046872-metal ion binding,                                                                                                                                                                                                                                                                                                                                                                                                                                                         |
| UTJ    | UP   | LOC100627422 | ligand-dependent corepressor(LOC100627422)                                | GO:0003677-DNA binding,GO:0003700-transcription factor activity, sequence-specific DNA binding,                                                                                                                                                                                                                                                                                                                                                                                                                       |
| UTJ    | UP   | RENBP        | renin binding protein(RENBP)                                              | GO:0003824-catalytic activity,GO:0004866-endorpeptidase inhibitor activity,GO:0030414-peptidase inhibitor activity,GO:0050121-N-acylglucosamine 2-epimerase activity,                                                                                                                                                                                                                                                                                                                                                 |
| UTJ    | UP   | HPGD         | hydroxyprostaglandin dehydrogenase 15-(NAD)(HPGD)                         | GO:0003824-catalytic activity,GO:0004957-prostaglandin E receptor activity,GO:0016404-15-hydroxyprostaglandin dehydrogenase (NAD+) activity,GO:0051287-NAD binding,GO:0070403-NAD+ binding,                                                                                                                                                                                                                                                                                                                           |
| UTJ    | UP   | UAP1         | UDP-N-acetylglucosamine pyrophosphorylase 1(UAP1)                         | GO:0003977-UDP-N-acetylglucosamine diphosphorylase activity,                                                                                                                                                                                                                                                                                                                                                                                                                                                          |
| UTJ    | UP   | ALDH2        | aldehyde dehydrogenase 2 family (mitochondrial)(ALDH2)                    | GO:0004029-aldehyde dehydrogenase (NAD) activity,GO:0016620-oxidoreductase activity, acting on the aldehyde or oxo group of donors, NAD or NADP as acceptor,                                                                                                                                                                                                                                                                                                                                                          |
| UTJ    | UP   | CA9          | carbonic anhydrase 9(CA9)                                                 | GO:0004089-carbonate dehydratase activity,GO:0008270-zinc ion binding,                                                                                                                                                                                                                                                                                                                                                                                                                                                |
| UTJ    | UP   | CHKA         | choline kinase alpha(CHKA)                                                | GO:0004103-choline kinase activity,GO:004104-cholinesterase activity,GO:0004305-ethanolamine kinase activity,GO:0008144-drug binding,                                                                                                                                                                                                                                                                                                                                                                                 |

|     |      |          |                                                                                                |                                                                                                                                                                                                                                                                                                                                                                                     |
|-----|------|----------|------------------------------------------------------------------------------------------------|-------------------------------------------------------------------------------------------------------------------------------------------------------------------------------------------------------------------------------------------------------------------------------------------------------------------------------------------------------------------------------------|
| UTJ | UP   | JAK2     | Janus kinase 2(JAK2)                                                                           | GO:0004672-protein kinase activity,GO:0004713-protein tyrosine kinase activity,GO:0004715-non-membrane spanning protein tyrosine kinase activity,GO:0005131-growth hormone receptor binding,GO:0005524-ATP binding,GO:0016301-kinase activity,GO:0020037-heme binding,GO:0035401-histone kinase activity (H3-Y41 specific),GO:0042393-histone binding,GO:0046872-metal ion binding, |
| UTJ | UP   | HIPK3    | homeodomain interacting protein kinase 3(HIPK3)                                                | GO:0004674-protein serine/threonine kinase activity,GO:0005524-ATP binding,                                                                                                                                                                                                                                                                                                         |
| UTJ | UP   | CAMK1D   | calcium/calmodulin dependent protein kinase ID(CAMK1D)                                         | GO:0004674-protein serine/threonine kinase activity,GO:0005524-ATP binding,                                                                                                                                                                                                                                                                                                         |
| UTJ | UP   | MAPK10   | mitogen-activated protein kinase 10(MAPK10)                                                    | GO:0004707-MAP kinase activity,GO:0005524-ATP binding,                                                                                                                                                                                                                                                                                                                              |
| UTJ | UP   | DYRK1A   | dual specificity tyrosine phosphorylation regulated kinase 1A(DYRK1A)                          | GO:0004712-protein serine/threonine/tyrosine kinase activity,GO:0005524-ATP binding,                                                                                                                                                                                                                                                                                                |
| UTJ | UP   | CTDSP1   | CTD small phosphatase like(CTDSP1)                                                             | GO:0004721-phosphoprotein phosphatase activity,                                                                                                                                                                                                                                                                                                                                     |
| UTJ | UP   | CDC14A   | cell division cycle 14A(CDC14A)                                                                | GO:0004722-protein serine/threonine phosphatase activity,GO:0004725-protein tyrosine phosphatase activity,GO:0008138-protein tyrosine/serine/threonine phosphatase activity,                                                                                                                                                                                                        |
| UTJ | UP   | MYLIP    | myosin regulatory light chain interacting protein(MYLIP)                                       | GO:0004842-ubiquitin-protein transferase activity,GO:0008270-zinc ion binding,GO:0061630-ubiquitin protein ligase activity,                                                                                                                                                                                                                                                         |
| UTJ | UP   | CD27     | CD27 molecule(CD27)                                                                            | GO:0005031-tumor necrosis factor-activated receptor activity,GO:0043027-cysteine-type endopeptidase inhibitor activity involved in apoptotic process,                                                                                                                                                                                                                               |
| UTJ | UP   | ELMO1    | engulfment and cell motility 1(ELMO1)                                                          | GO:0005085-guanyl-nucleotide exchange factor activity,                                                                                                                                                                                                                                                                                                                              |
| UTJ | UP   | ECT2L    | epithelial cell transforming 2 like(ECT2L)                                                     | GO:0005089-Rho guanyl-nucleotide exchange factor activity,                                                                                                                                                                                                                                                                                                                          |
| UTJ | UP   | ARHGAP20 | Rho GTPase activating protein 20(ARHGAP20)                                                     | GO:0005096-GTPase activator activity,                                                                                                                                                                                                                                                                                                                                               |
| UTJ | UP   | ADAP2    | ArfGAP with dual PH domains 2(ADAP2)                                                           | GO:0005096-GTPase activator activity,GO:0005547-phosphatidylinositol-3,4,5-trisphosphate binding,GO:0043533-inositol 1,3,4,5 tetrakisphosphate binding,                                                                                                                                                                                                                             |
| UTJ | UP   | ARRB1    | arrestin beta 1(ARRB1)                                                                         | GO:0005096-GTPase activator activity,GO:0043027-cysteine-type endopeptidase inhibitor activity involved in apoptotic process,GO:0044212-transcription regulatory region DNA binding,                                                                                                                                                                                                |
| UTJ | UP   | CHN2     | chimerin 2(CHN2)                                                                               | GO:0005096-GTPase activator activity,GO:0046872-metal ion binding,                                                                                                                                                                                                                                                                                                                  |
| UTJ | UP   | EPB41L1  | erythrocyte membrane protein band 4.1 like 1(EPB41L1)                                          | GO:0005200-structural constituent of cytoskeleton,                                                                                                                                                                                                                                                                                                                                  |
| UTJ | UP   | SLC2A12  | solute carrier family 2 member 12(SLC2A12)                                                     | GO:0005351-sugar:proton symporter activity,GO:0005355-glucose transmembrane transporter activity,                                                                                                                                                                                                                                                                                   |
| UTJ | UP   | EPS15    | epidermal growth factor receptor pathway substrate 15(EPS15)                                   | GO:0005509-calcium ion binding,                                                                                                                                                                                                                                                                                                                                                     |
| UTJ | UP   | EFCAB6   | EF-hand calcium binding domain 6(EFCAB6)                                                       | GO:0005509-calcium ion binding,                                                                                                                                                                                                                                                                                                                                                     |
| UTJ | UP   | MTR      | 5-methyltetrahydrofolate-homocysteine methyltransferase(MTR)                                   | GO:0008270-zinc ion binding,GO:0008705-methionine synthase activity,GO:0008898-S-adenosylmethionine-homocysteine S-methyltransferase activity,GO:0031419-cobalamin binding,                                                                                                                                                                                                         |
| UTJ | UP   | RNF128   | ring finger protein 128, E3 ubiquitin protein ligase(RNF128)                                   | GO:0008270-zinc ion binding,GO:0061630-ubiquitin protein ligase activity,                                                                                                                                                                                                                                                                                                           |
| UTJ | UP   | CHDH     | choline dehydrogenase(CHDH)                                                                    | GO:0008812-choline dehydrogenase activity,GO:0050660-flavin adenine dinucleotide binding,                                                                                                                                                                                                                                                                                           |
| UTJ | UP   | ANKZF1   | ankyrin repeat and zinc finger domain containing 1(ANKZF1)                                     | GO:0046872-metal ion binding,                                                                                                                                                                                                                                                                                                                                                       |
| UTJ | UP   | RDH10    | retinol dehydrogenase 10 (all-trans)(RDH10)                                                    | GO:0052650-NADP-retinol dehydrogenase activity,                                                                                                                                                                                                                                                                                                                                     |
| UTJ | UP   | TTL6     | tubulin tyrosine ligase like 6(TTL6)                                                           | GO:0070739-protein-glutamic acid ligase activity,                                                                                                                                                                                                                                                                                                                                   |
| UTJ | DOWN | ATP8B2   | ATPase phospholipid transporting 8B2(ATP8B2)                                                   | GO:0000287-magnesium ion binding,GO:0004012-phospholipid-translocating ATPase activity,GO:0005524-ATP binding,                                                                                                                                                                                                                                                                      |
| UTJ | DOWN | CREB3L2  | cAMP responsive element binding protein 3 like 2(CREB3L2)                                      | GO:000978-RNA polymerase II core promoter proximal region sequence-specific DNA binding,GO:0011077-transcriptional activator activity, RNA polymerase II core promoter proximal region sequence-specific binding,GO:0035497-cAMP response element binding,                                                                                                                          |
| UTJ | DOWN | DPF2     | double PHD fingers 2(DPF2)                                                                     | GO:000978-RNA polymerase II core promoter proximal region sequence-specific DNA binding,GO:0008270-zinc ion binding,                                                                                                                                                                                                                                                                |
| UTJ | DOWN | ABHD2    | abhydrolase domain containing 2(ABHD2)                                                         | GO:0003707-steroid hormone receptor activity,GO:0042562-hormone binding,GO:0047372-acylglycerol lipase activity,                                                                                                                                                                                                                                                                    |
| UTJ | DOWN | MAGED1   | MAGE family member D1(MAGED1)                                                                  | GO:0003713-transcription coactivator activity,                                                                                                                                                                                                                                                                                                                                      |
| UTJ | DOWN | EEFIG    | eukaryotic translation elongation factor 1 gamma(EEFIG)                                        | GO:0003746-translation elongation factor activity,GO:0004364-glutathione transferase activity,                                                                                                                                                                                                                                                                                      |
| UTJ | DOWN | B4GALT1  | beta-1,4-galactosyltransferase 1(B4GALT1)                                                      | GO:0003831-beta-N-acetylglucosaminylglycopeptide beta-1,4-galactosyltransferase activity,GO:0003945-N-acetyllactosamine synthase activity,GO:0004461-lactose synthase activity,GO:0030145-manganese ion binding,                                                                                                                                                                    |
| UTJ | DOWN | MMP19    | matrix metalloproteinase 19(MMP19)                                                             | GO:0004222-metalloendopeptidase activity,GO:0004252-serine-type endopeptidase activity,GO:0005509-calcium ion binding,GO:0008270-zinc ion binding,                                                                                                                                                                                                                                  |
| UTJ | DOWN | HTRA4    | HtrA serine peptidase 4(HTRA4)                                                                 | GO:0004252-serine-type endopeptidase activity,                                                                                                                                                                                                                                                                                                                                      |
| UTJ | DOWN | PRSS23   | protease, serine 23(PRSS23)                                                                    | GO:0004252-serine-type endopeptidase activity,                                                                                                                                                                                                                                                                                                                                      |
| UTJ | DOWN | ALDH18A1 | aldehyde dehydrogenase 18 family member A1(ALDH18A1)                                           | GO:0004349-glutamate 5-kinase activity,GO:0004350-glutamate-5-semialdehyde dehydrogenase activity,GO:0017084-delta1-pyrroline-5-carboxylate synthetase activity,GO:0044822-poly(A) RNA binding,                                                                                                                                                                                     |
| UTJ | DOWN | GAPDH    | glyceraldehyde-3-phosphate dehydrogenase(GAPDH)                                                | GO:0004365-glyceraldehyde-3-phosphate dehydrogenase (NAD+) (phosphorylating) activity,GO:0008017-microtubule binding,GO:0016620-oxidoreductase activity, acting on the aldehyde or oxo group of donors, NAD or NADP as acceptor,GO:0035605-peptidyl-cysteine S-nitrosylase activity,GO:0050661-NADP binding,GO:0051287-NAD binding,                                                 |
| UTJ | DOWN | NPR2     | natriuretic peptide receptor B/guanylate cyclase B (atrionatriuretic peptide receptor B)(NPR2) | GO:0004383-guanylate cyclase activity,GO:0004672-protein kinase activity,GO:0005524-ATP binding,GO:0016941-natriuretic peptide receptor activity,GO:0042562-hormone binding,                                                                                                                                                                                                        |
| UTJ | DOWN | HMGC51   | 3-hydroxy-3-methylglutaryl-CoA synthase 1(HMGC51)                                              | GO:0004421-hydroxymethylglutaryl-CoA synthase activity,                                                                                                                                                                                                                                                                                                                             |
| UTJ | DOWN | CYP51    | cytochrome P450, family 51, subfamily A, polypeptide 1(CYP51)                                  | GO:0004497-monoxygenase activity,GO:0005506-iron ion binding,GO:0008168-methyltransferase activity,GO:0008398-sterol 14-demethylase activity,GO:0016705-oxidoreductase activity, acting on paired donors, with incorporation or reduction of molecular oxygen,GO:0020037-heme binding,                                                                                              |
| UTJ | DOWN | SQLE     | squalene epoxidase(SQLE)                                                                       | GO:0004506-squalene monooxygenase activity,GO:0050660-flavin adenine dinucleotide binding,                                                                                                                                                                                                                                                                                          |
| UTJ | DOWN | PGK1     | phosphoglycerate kinase 1(PGK1)                                                                | GO:0004618-phosphoglycerate kinase activity,GO:0005524-ATP binding,                                                                                                                                                                                                                                                                                                                 |
| UTJ | DOWN | CCNO     | cyclin O(CCNO)                                                                                 | GO:0004844-uracil DNA N-glycosylase activity,                                                                                                                                                                                                                                                                                                                                       |
| UTJ | DOWN | GNC2     | G protein subunit gamma 2(GNC2)                                                                | GO:0004871-signal transducer activity,                                                                                                                                                                                                                                                                                                                                              |
| UTJ | DOWN | ACKR3    | atypical chemokine receptor 3(ACKR3)                                                           | GO:0005044-scavenger receptor activity,GO:0015026-coreceptor activity,GO:0016494-C-X-C chemokine receptor activity,                                                                                                                                                                                                                                                                 |
| UTJ | DOWN | GD12     | GDP dissociation inhibitor 2(GDI2)                                                             | GO:0005093-Rab GDP-dissociation inhibitor activity,GO:0005096-GTPase activator activity,GO:0016491-oxidoreductase activity,GO:0044822-poly(A) RNA binding,                                                                                                                                                                                                                          |
| UTJ | DOWN | TP23     | basic proline-rich protein(TP23)                                                               | GO:0005179-hormone activity,                                                                                                                                                                                                                                                                                                                                                        |
| UTJ | DOWN | FBN1     | fibrillin 1(FBN1)                                                                              | GO:0005179-hormone activity,GO:0005201-extracellular matrix structural constituent,GO:0005509-calcium ion binding,GO:0008201-heparin binding,                                                                                                                                                                                                                                       |
| UTJ | DOWN | COL1A2   | collagen type I alpha 2 chain(COL1A2)                                                          | GO:0005201-extracellular matrix structural constituent,                                                                                                                                                                                                                                                                                                                             |
| UTJ | DOWN | VCAN     | versican(VCAN)                                                                                 | GO:0005201-extracellular matrix structural constituent,GO:0005509-calcium ion binding,GO:0005540-hyaluronic acid binding,                                                                                                                                                                                                                                                           |
| UTJ | DOWN | FBXL5    | F-box and leucine rich repeat protein 5(FBXL5)                                                 | GO:0005506-iron ion binding,                                                                                                                                                                                                                                                                                                                                                        |
| UTJ | DOWN | CD248    | CD248 molecule(CD248)                                                                          | GO:0005509-calcium ion binding,GO:0050840-extracellular matrix binding,                                                                                                                                                                                                                                                                                                             |

|     |      |        |                                                                |                                                                                   |
|-----|------|--------|----------------------------------------------------------------|-----------------------------------------------------------------------------------|
| UTJ | DOWN | CALM2  | calmodulin 2(CALM2)                                            | GO:0005509-calcium ion binding,GO:0072542-protein phosphatase activator activity, |
| UTJ | DOWN | HSPA13 | heat shock protein family A (Hsp70) member 13(HSPA13)          | GO:0005524-ATP binding,                                                           |
| UTJ | DOWN | RHOC   | ras homolog family member C(RHOC)                              | GO:0005525-GTP binding,                                                           |
| UTJ | DOWN | CPXM1  | carboxypeptidase X, M14 family member 1(CPXM1)                 | GO:0008270-zinc ion binding,                                                      |
| UTJ | DOWN | SEC23A | Sec23 homolog A, coat complex II component(SEC23A)             | GO:0008270-zinc ion binding,                                                      |
| UTJ | DOWN | SLC9B1 | solute carrier family 9 member B1(SLC9B1)                      | GO:0015299-solute:proton antiporter activity,                                     |
| UTJ | DOWN | SEC61G | Sec61 translocon gamma subunit(SEC61G)                         | GO:0015450-P-P-bond-hydrolysis-driven protein transmembrane transporter activity, |
| UTJ | DOWN | PLAUR  | plasminogen activator, urokinase receptor(PLAUR)               | GO:0030377-urokinase plasminogen activator receptor activity,                     |
| UTJ | DOWN | FAM98A | family with sequence similarity 98 member A(FAM98A)            | GO:0044822-poly(A) RNA binding,                                                   |
| UTJ | DOWN | KDEL3  | KDEL endoplasmic reticulum protein retention receptor 3(KDEL3) | GO:0046923-ER retention sequence binding,                                         |
| UTJ | DOWN | SHAS2  | hyaluronan synthase 2(SHAS2)                                   | GO:0050501-hyaluronan synthase activity,                                          |
